# Supplementary material for: CircRNA signatures define ATLL subtypes and uncover the HBZ-DHX9 axis in tumor survival
Source: Research Square preprint supplement (doi:10.21203/rs.3.rs-6001314/v1), 2025-02-13
Supplement: Supplementary file 1 [file 107cbc36ab8fdad64d1fdeac.xlsx]

## Sheet: RT-qPCR
RTqPCR
Target	Name	Sequence
GAPDH	GAPDH_F	CTATAAATTGAGCCCGCAGC
	GAPDH_R	AGAAGATGCGGCTGACTGTC
HBZ	HBZ_F	AAACGCATCGTGATCGGCAGC
	HBZ_R	TTGTCTCCACTTGCGCTCACGGCG
circAFF2(3)	circAFF2(3)_F	CTTGGATGGAAAACCCAGTGC
	circAFF2(3)_R	TTCTGGACTCGGTTGGCAAGTGC
AFF2	AFF2_F	CCGCAGAAATGTCAGTGGC
	AFF2_R	ACCGATATCCCTTTGAAAGTAGC
circPLEKHM1(4)	cPLEKHM1_0002_F	ATGTCCTGTGACTCAGACC
	cPLEKHM1_0002_R	CGTGTTGACAAACGTCAGGT
PLEKHM1	PLEKHM1_F	AAAATCATCACGGCCAAGGC
	PLEKHM1_R	AGTAGGATGCCAGGACTTTGC
circTMEM138(3,4)	cTMEM138_0003_F#2	TCCTTCAGAACTTACGCTGG
	cTMEM138_0003_R#2	GCCTGGAAGACGAAGGTGTT
TMEM138	TMEM138_F	CTTCAACACCTTCGTCTTCCAG
	TMEM138_R	AGACATGAAGGGAGATGCTGAG
circCCDC7(2-9)	cCCDC7_0003_F	AAGTTGTGAAGCTCTGGC
	cCCDC7_0003_R	CCGATTTGTTACTGGTGGTC
CCDC7	CCDC7_F	GTGAGGGGAAAACTGAGACAAC
	CCDC7_R	CCACCTGAATCTGAAACCAGTG
circSATB1(2-5)	cSATB1_0005_F	AGTTCATTGGCCAAGGAGTGC
	cSATB1_0005_R	AATGTGAGTGATCCGAAGGGTCC
SATB1	SATB1_F	ATGGTTGTGCGAGCTGTTAC
	SATB1_R	ACTGAGGAACCTTCGGATCATG
circmCherry	circmCherry_F	TGCGCTTCAAGGTGCACATG	Li, Xiang and al., Molecular Cell, 2017)
	circmCherry_R	ACAGGATGTCCCAGGCGAAG
Primary RNA EGFP-mCherry	EGFP_mCherry_F	GACCACATGAAGCAGCACGA
	EGFP_mCherry_R	ACAGGATGTCCCAGGCGAAG

## Sheet: RT-PCR
RT-PCR
Target	Name	Sequence
circAFF2(3)	Full_circAFF2(3)_F	AAGGTGATGCACTTGCCAACCG
	Full_circAFF2(3)_R	TGGAGGATGGTGAACTTTGGC
circSATB1(2,3,4,5)	Full_circSATB1(2,3,4,5)_F	GACAGTGACTGAGTATGG
	Full_circSATB1(2,3,4,5)_R	CACTCCTTGGCCAATGAACTC

## Sheet: CLIP-RIP
CLIP/RIP
Target	Name	Sequence
AFF2_I2	Intron2_AFF2_F	GCTGTTTAATTCCATTCCTGTCC
	Intron2_AFF2_R	ACATATCAGCCTTTGCACCAC
AFF2_I3	Intron3_AFF2_F	CTGTCACTGGTGACTAAAGGC
	Intron3_AFF2_R	CTACAACCATTCAGACAGACTGC
AFF2_I5	Intron5_AFF2_F	CTGTCCAAGTCGCTGTGC
	Intron5_AFF2_R	CTTGTGAGCAAGAACTGGAAGG
pcircmCherry_UpStream_Intron	mCherry-Nter_Intron_F	tccccttcatgtttctcaccag
	mCherry-Nter_Intron_R	tccctcgagcctgatgaaatc
pcircmCherry_DownStream_Intron	Intron_mCherry-Cter_F	caagctgaaggtgtgtggtc
	Intron_mCherry-Cter_R	tggcctgagttttcctaaccc
GAPDH	CLIP_GAPDH_F	AAGGTGAAGGTCGGAGTCAAC
	CLIP_GAPDH_R	GGGGTCATTGATGGCAACAATA
SATB1_I1	Intron1_SATB1_F	TTGAGCTTGGCACTTCAACC
	Intron1_SATB1_R	ACAGGAAGAAGTGAAGGGTTTTC
SATB1_I5	Intron5_SATB1_F	AAAGGGCTGCTTTTGTGGTC
	Intron5_SATB1_R	TGGCCTTAAAACGGGTTTGG
SATB1_I9	Intron9_SATB1_F	TAGAGGCAAATAGGGACTCCAG
	Intron9_SATB1_R	AGCCAGGCTGTTTTAGGATTC
			Li, Xiang and al., Molecular Cell, 2017)

## Sheet: siRNA
siRNA sequences
Target	Name	Sequence
Gaussia Luciferase	siGL2 (CTL)	CGUACGCGGAAUACUUCGAdTdT
DHX9	siDHX9	GAGCCAACUUGAAGGAUUAAdTdT
circAFF2(3)	siRNA-circAFF2	UCCAAACAAGUGAAACAAACAdTdT

## Sheet: IVT_Sequences
IVT_Sequences (cloned in pUCIDT)
Name	Sequence
circAFF2(3)_IVT	taatacgactcactataggGGGAGACCCTCGACCGTCGATTGTCCACTGGTCAACAATAGATGACTTACAACTAATCGGAAGGTGCAGAGACTCGACGGGAGCTACCCTAACGTCAAGACGAGGGTAAAGAGAGAGTCCAATTCTCAAAGCCAATAGGCAGTAGCGAAAGCTGCAAGAGAATGAAAATCCGTTGACCTTAAACGGTCGTGTGGGTTCAAGTCCCTCCACCCCCACACAAACAAAGGTGATGCACTTGCCAACCGAGTCCAGAACACGCTTGGAAACTATGATGAAATGAAGAATTTGCTAACTAACCATTCTAATCAGAATCACCTAGTGGGAATTCCAAAGAATTCTGTGCCCCAGAATCCCAACAACAAAAATGAACCAAGCTTTTT…
circSATB1(2,3,4,5)_IVT	taatacgactcactataggGGGAGACCCTCGACCGTCGATTGTCCACTGGTCAACAATAGATGACTTACAACTAATCGGAAGGTGCAGAGACTCGACGGGAGCTACCCTAACGTCAAGACGAGGGTAAAGAGAGAGTCCAATTCTCAAAGCCAATAGGCAGTAGCGAAAGCTGCAAGAGAATGAAAATCCGTTGACCTTAAACGGTCGTGTGGGTTCAAGTCCCTCCACCCCCACGTGATCTTTAGACAGTGACTGAGTATGGATCATTTGAACGAGGCAACTCAGGGGAAAGAACATTCAGAAATGTCTAACAATGTGAGTGATCCGAAGGGTCCACCAGCCAAGATTGCCCGCCTGGAGCAGAACGGGAGCCCGCTAGGAAGAGGAAGGCTTGGGAG…
IRES_mCherry_IVT	taatacgactcactataggGGGAGACCCTCGACCGTCGATTGTCCACTGGTCAACAATAGATGACTTACAACTAATCGGAAGGTGCAGAGACTCGACGGGAGCTACCCTAACGTCAAGACGAGGGTAAAGAGAGAGTCCAATTCTCAAAGCCAATAGGCAGTAGCGAAAGCTGCAAGAGAATGAAAATCCGTTGACCTTAAACGGTCGTGTGGGTTCAAGTCCCTCCACCCCCACGCCGGAAACGCAATAGCCGAAAAACAAAAAACAAAAAAAACAAAAAAAAAACCAAAAAAACAAAAGCTTCACATTAAAACAGCCTGTGGGTTGATCCCACCCACAGGCCCATTGGGCGCTAGCACTCTGGTATCACGGTACCTTTGTGCGCCTGTTTTATACCC…
pUC(IDT)	tcgcgcgtttcggtgatgacggtgaaaacctctgacacatgcagctcccggagacggtcacagcttgtctgtaagcggatgccgggagcagacaagcccgtcagggcgcgtcagcgggtgttggcgggtgtcggggctggcttaactatgcggcatcagagcagattgtactgagagtgcaccaaatgcggtgtgaaataccgcacagatgcgtaaggagaaaataccgcatcaggcgccattcgccattcaggctgcgcaactgttgggaagggcgatcggtgcgggcctcatcgctattacgccagctggcgaaagggggatgtgctgcaaggcgattaagttgggtaacgccagggttttcccagtcacgacgttgtaaaacgacggccagtgcaa…

## Sheet: Antibodies
Antibodies
Antibody	Reference	Provider	Use
Myc-tag	4A6	Milipore	WB / IP
Tubulin	2146S	Cell Signaling Technologies	WB
DHX9	ab26271	Abcam	WB / CLIP / IP
J2 (dsRNA)	10010200	Scicons	RIP
Rabbit IgG Isotype Control	BETA90-137P	Bethyl Laboratories	WB
Mouse IgG Isotype Control	BETA120-108P	Bethyl Laboratories	WB
Rabbit IgG Isotype Control	10500C	ThermoFisher Scientific	CLIP / RIP / IP
Mouse IgG Isotype Control	10400C	ThermoFisher Scientific	CLIP / RIP / IP
HBZ	4D4-F3		WB
