# Supplementary material for: CircRNA signatures define ATLL subtypes and uncover the HBZ-DHX9 axis in tumor survival
Source: Research Square preprint supplement (doi:10.21203/rs.3.rs-6001314/v1), 2025-02-13
Supplement: Supplementary file 2 [file 9120c6ca900292951a4b519d.xlsx]

## Sheet: DGE Chronic vs Donor
	baseMean	log2FoldChange	lfcSE	stat	pvalue	padj
DNALI1|DNALI1	16.9994863741971	1.88951687551815	0.956055241729392	1.97636788445429	0.0481131261733132	0.253436374585252
C2orf49|C2orf49	600.3667976774	-0.369135516994773	0.218604563688675	-1.68859931726071	0.0912962416149783	0.349229091833052
SMA5|SMA5	527.987455237344	-0.247785379466902	0.53903173004555	-0.459686073482099	0.645741567126073	0.857786675981766
TMX1|TMX1	1497.28269651221	0.401737989500982	0.36751940805321	1.09310686918286	0.274346880348084	0.595273190338696
ZNF14|ZNF14	734.973227202806	-0.287549419302162	0.511517472402917	-0.562149750137298	0.574013994636452	0.819156308320113
MGAT5B|MGAT5B	14.3098920531015	-0.802243650790113	2.28257649357968	-0.351464081509042	0.725240214605578	0.8948740467468
KIF21A|KIF21A	428.253767323621	0.747249497472056	0.514451033156056	1.45251821711355	0.14635756759504	0.441685768778951
ZNF136|ZNF136	740.713800523486	-0.916508703457717	0.32067235395681	-2.85808455936042	0.00426206797627598	0.0643696916472566
FANCE|FANCE	113.20050468552	0.596976610721293	0.550079145825454	1.08525584954773	0.277808354390789	0.599309110442836
CAPS|CAPS	289.852669456248	-0.236424267498362	0.410185305694573	-0.576384049394508	0.564355623330922	0.812641633055457
A1BG-AS1|A1BG-AS1	29.6322813790614	2.96285591257744	1.29847891411703	2.28178977753536	0.0225017546029584	0.169378286852604
ASGR1|ASGR1	38.6754543377536	-0.139678789115836	1.2161765859342	-0.114850746784064	0.908563425031975	0.971013576868203
SNORD116-16|SNORD116-16	5.54621260006241	-1.47079795773193	0.934528740259582	-1.5738391922793	0.115524630761796	0.393032382695371
CDR2|CDR2	1356.8417078931	-1.186351050915	0.52378269819715	-2.26496800104012	0.0235146432261781	0.172755138855392
BTN2A1|BTN2A1	648.916183811125	0.25546462840306	0.302291030175329	0.845094967769605	0.398057817750212	0.707142878733779
ATG9A|ATG9A	682.07507911492	-0.318146564945516	0.356722713879402	-0.891859566456067	0.372468209320684	0.685757874739066
UAP1L1|UAP1L1	169.512113106719	0.590689753261034	0.722842344463518	0.817176467019838	0.413827588958764	0.718959410877126
LIME1|LIME1	1374.90060102202	-0.659904416704228	0.57305605610935	-1.15155299323511	0.249504807102631	0.57177461122721
FCER1A|FCER1A	90.7682220465644	-0.711640319424474	1.69082981151157	-0.420882287844382	0.673841039552705	0.871765249109107
MIR3687-2|MIR3687-2	44.0629098704951	-0.58954400024634	1.05155768149957	-0.560638765346301	0.575043819182011	0.819674519833068
MIR374B|MIR374B	7.16516359188365	2.30935543253426	1.3952691624489	1.65513256845797	0.0978976097590159	0.361243077383211
ZNF708|ZNF708	673.696836504569	-0.0539514693825432	0.4463142536467	-0.120882245955001	0.903784304713821	0.968135234215828
URM1|URM1	594.126211391608	-0.654275609158719	0.305972737339445	-2.13834609857043	0.0324886637200297	0.206097723712677
DUOX1|DUOX1	50.7850547279654	0.0992257763860857	0.685351034409264	0.144780953707341	0.884883820505893	0.962115018581482
TCHP|TCHP	369.251430247101	0.660859392680341	0.39637360991175	1.66726385449192	0.0954619505888179	0.356142100947469
MTF1|MTF1	684.934182286515	0.175168005225665	0.332086905584193	0.52747639934046	0.597862801353346	0.8321807033187
DEFA3|DEFA3	19.5462573530702	-0.404878963219004	1.41260724133916	-0.286618213025142	0.774404667307847	0.916635684689702
TNFAIP8|TNFAIP8	3845.46709129821	-0.4435468714776	0.351701433582925	-1.26114604356032	0.20725623426616	0.523113017167081
ZNF385D-AS1|ZNF385D-AS1	72.341968922525	18.0919644845117	3.3266221735874	5.43853901659096	5.37192469180768e-08	1.29168307519072e-05
CXorf65|CXorf65	123.398156736304	0.373042119074225	0.678199610301806	0.550047675356547	0.582286674064294	0.823742521753097
CCDC159|CCDC159	158.9128085812	0.231096130447979	0.470948712090359	0.490703391930371	0.623636247109031	0.845984744588429
BEND5|BEND5	13.3688334571521	-1.37723235737735	1.60558257852064	-0.857777342505994	0.391015423150346	0.701199086557007
OSGEPL1|OSGEPL1	157.681041630962	0.498549040047236	0.517673813004877	0.963056325282074	0.335519257809609	0.653377378478876
CDO1|CDO1	7.78831330242001	-4.5412066468878	2.63065599473026	-1.72626396457186	0.0842999351534243	0.336018793588433
CASP6|CASP6	225.621630509817	-0.272390101193717	0.569143439401351	-0.478596575724792	0.63222565486569	0.850958290033289
NISCH|NISCH	2133.92259371809	0.137174983822079	0.383054654833916	0.358108123973991	0.720262399636985	0.893061762043814
GGT1|GGT1	492.137350594127	0.877398075116861	0.347639187912231	2.52387563204865	0.0116068983404429	0.11746526945408
EMB|EMB	7445.39257523906	-0.917233110917945	0.442637464883713	-2.07219944917883	0.0382468447680924	0.223919798998928
CCDC92|CCDC92	309.187166107155	1.03479105007028	0.481970353535901	2.14700145450585	0.0317931658200701	0.203820100217889
PPP4R3B|PPP4R3B	3161.00210969267	0.423407715156185	0.342322750819082	1.23686700385262	0.216136461693306	0.534378229403059
SLC7A11-AS1|SLC7A11-AS1	4.2707963219307	1.50389087578894	2.3220002625493	0.64767041591022	0.517198142658605	0.785039590039673
LOC101241902|LOC101241902	67.0075630603026	2.5930103821622	1.1704214885086	2.21545008154825	0.0267291870615943	0.183280838388271
CCAT2|CCAT2	5.95268183739767	-1.51710846131102	1.56706889225012	-0.968118548465757	0.332985167356158	0.650749854435769
PSMA3|PSMA3	818.509879206035	-0.39727074685263	0.309513817560121	-1.28353153983332	0.199305917052942	0.51367008090698
SOX12|SOX12	137.675740445814	-0.985252082145016	0.848730149818094	-1.1608543449955	0.245701138056325	0.566839166067239
AURKAPS1|AURKAPS1	102.745199124573	0.672870882870095	0.543823164002699	1.23729720874257	0.215976763751692	0.534314490811719
IFIH1|IFIH1	1086.84752924314	-0.0234628581921598	0.553123703453134	-0.0424188261064964	0.966164820793078	0.990962339169216
ADGRL4|ADGRL4	23.6239716300411	1.76104663456766	2.51256711080604	0.700895361956206	0.483368319126885	0.764703348148849
SPNS3|SPNS3	41.1522587650261	-1.48238796699709	0.883743166338804	-1.67739680877914	0.093464912997786	0.352860016518842
PCM1|PCM1	6567.04550587396	0.392914561460881	0.282460051133694	1.39104471546989	0.164211867670218	0.467393298577186
SYS1|SYS1	957.427899716301	-0.612254943435746	0.384955851916704	-1.59045495837332	0.111732290680581	0.386332600238838
C1orf228|C1orf228	243.151836225328	-0.760553726328723	1.28767547903572	-0.590640839800929	0.554761094827737	0.809048601207478
NRL|NRL	24.1732285061856	-1.12803352489055	0.48997591951866	-2.30222237451731	0.0213226348086744	0.164714941834249
TMEM63A|TMEM63A	1909.00286825717	0.565619314515986	0.527562941634009	1.07213617538053	0.283658872513282	0.606379232697262
MEGF10|MEGF10	14.5553927252951	3.24502259096364	2.05880438284114	1.57616848788982	0.114986978702122	0.392308868549907
SIRT2|SIRT2	756.934222383785	0.215127433382386	0.376726177219638	0.571044558066277	0.567969439016785	0.814939509887215
LYPD2|LYPD2	7.58347088046925	3.81977153717837	2.62855144759772	1.45318500068519	0.146172395565545	0.441219691361475
SLC25A26|SLC25A26	473.965776603653	-0.902734559726404	0.353283519857156	-2.55526937710372	0.0106105647768612	0.111585549467746
TRIM38|TRIM38	1787.33533547355	0.127115281417529	0.358878280082117	0.354201656863835	0.723187761983994	0.893925114538818
AKNA|AKNA	7492.16373713182	-0.0289579966525676	0.299228700422221	-0.0967754650931109	0.92290470848079	0.976379078092833
KLHL21|KLHL21	713.123671007797	-0.751621816853119	0.415542837935527	-1.80877095749569	0.0704865940025686	0.308155475752074
KIR3DL2|KIR3DL2	901.34060364784	5.95693432628917	1.30765993151864	4.55541550422144	5.22821288786729e-06	0.000619833683483823
CDK20|CDK20	38.1403956246432	-0.483546264710936	0.818515355498838	-0.590760162851486	0.554681130580012	0.809014631461936
ST8SIA4|ST8SIA4	1810.25822073583	0.741958558082706	0.437696429817415	1.69514418564532	0.0900480719008447	0.34724416318148
MVK|MVK	130.348184874357	0.679917713438259	0.715613016049122	0.950119265845755	0.342051654913626	0.659756621024226
CDC45|CDC45	129.494066717119	0.0718920796072443	1.10952574172201	0.0647953237170202	0.948336964761191	0.985273165920341
PAM|PAM	362.925468079193	0.175883958336126	0.664372030297432	0.264737150745772	0.791211956097796	0.922653016704573
C18orf8|C18orf8	828.457732772674	0.146732272560213	0.253892019001216	0.577931803990695	0.5633101620788	0.812393134756445
ABHD11-AS1|ABHD11-AS1	4.98371566667367	-0.103693381046555	1.59582651194802	-0.064977853338191	0.948191633458986	0.985273165920341
RWDD4|RWDD4	321.25505355985	0.135986346530829	0.337761325353108	0.402610767791912	0.687234587038336	0.877786875781735
AKR7A2|AKR7A2	305.922572640136	0.258308388135247	0.422661550404841	0.611147117327871	0.541102189334072	0.799659324559553
SLC37A1|SLC37A1	312.912301740877	0.1437369062376	0.45907682444436	0.313099896540348	0.754204767699346	0.908088285080981
CHCHD6|CHCHD6	71.8095871127451	-0.60619207750017	0.635449054736122	-0.953958579341815	0.340104609388443	0.657412351843241
CALR|CALR	7636.22557647	-0.125387504507839	0.397567795200902	-0.315386472499557	0.752468236524368	0.907812838222329
PALLD|PALLD	396.167530412542	2.20855282165416	1.01434451797011	2.17732021273588	0.0294566840997067	0.193864499209789
PROB1|PROB1	37.4706127168569	0.49683308901314	0.805060229897273	0.617137787413169	0.537143846294656	0.796694124200945
PDXK|PDXK	1272.24978451748	0.689835428757661	0.333787315160473	2.0666915650345	0.0387632264929198	0.225653413265388
PCYOX1|PCYOX1	507.832362784817	0.101641584669142	0.379529753357087	0.267809265993202	0.78884613795172	0.921941724855374
ZNF124|ZNF124	863.036023307475	-0.364337945253204	0.45409422231905	-0.802339971190423	0.42235632679249	0.724849854877327
C10orf12|C10orf12	740.126250273325	0.160252105098269	0.344612051231495	0.465021767304994	0.641915868613386	0.856233167690335
CEACAM21|CEACAM21	430.015127692124	0.570499807213263	0.503434113916746	1.13321642582928	0.257123377904948	0.579180671275006
BAZ2A|BAZ2A	3202.63116624045	-0.527263238639342	0.323513778009386	-1.62980149372199	0.103143458002803	0.369619041776626
SNORD13|SNORD13	297.017893810663	-0.854742850757412	0.700179723291223	-1.22074779135228	0.222181526722766	0.540248258682676
CLEC5A|CLEC5A	97.6829877064485	3.11903300964312	1.31825681050036	2.3660283677649	0.0179800666659062	0.149417926969568
NUB1|NUB1	1440.15513902053	-0.142360364195559	0.307240370268844	-0.46335175312733	0.643112255393534	0.85662443671682
SLCO4C1|SLCO4C1	70.8316617265765	1.79164489851766	1.24407948308525	1.44013700320375	0.149828641955117	0.446400449469068
YIPF5|YIPF5	983.533930778525	-0.921166269901959	0.41333390488646	-2.22862499062349	0.0258388668463502	0.180049442775873
GOLGA8M|GOLGA8M	18.4453130634187	-0.88599323989808	1.13437892154599	-0.781038172580468	0.434780043808018	0.732225008177024
ZNF614|ZNF614	327.841788538681	-0.139558306415751	0.416381587423178	-0.335169254912116	0.73749741303639	0.90018605750276
PTEN|PTEN	5202.97965253247	-0.0336475410037618	0.34643648880056	-0.097124702770938	0.922627363624993	0.976345426917143
LINC00998|LINC00998	307.351390967596	0.393453693809352	0.584477807130593	0.673171314649147	0.500838308302502	0.775103074342891
LEAP2|LEAP2	21.0416385679308	0.373927596275709	0.679084926761039	0.550634510559958	0.581884246540836	0.823526186069523
SIRPG-AS1|SIRPG-AS1	102.7970452211	1.60729977394415	0.871408463776089	1.84448492384296	0.0651125009678717	0.297212021490657
SNORD27|SNORD27	39.8659875930839	-1.16515661767296	0.626962798202305	-1.85841428074173	0.0631102058527058	0.291623533378645
ARMT1|ARMT1	464.557797665457	0.528027419865839	0.543875964390472	0.970860001981528	0.331617998379918	0.649122156152095
AMIGO1|AMIGO1	116.765674108891	-1.00073137192726	0.627580501667568	-1.59458646224377	0.110804741900244	0.384645103238472
DSE|DSE	564.618120077059	0.0377023093753361	0.739376274945432	0.0509920464760904	0.959331858297355	0.988574484508507
DNAJC1|DNAJC1	900.945202667778	0.311770279202713	0.547549002441941	0.569392470468014	0.569089825491928	0.81581169710288
LOC102724699|LOC102724699	4.54895353605801	3.07146410145966	1.44262924360601	2.12907378321418	0.0332481564230969	0.20802182008971
SAMD10|SAMD10	151.384493853404	0.844647511307709	0.513011138072137	1.64645062967217	0.0996710166251837	0.364542962737041
AMY2B|AMY2B	375.647781707123	0.426476896594899	0.409049477872534	1.0426046717209	0.297131424685364	0.619974050626806
TSR2|TSR2	505.408212092738	-0.641441826879362	0.363524286237054	-1.76450886822202	0.0776463436090435	0.322623155485169
MIR6871|MIR6871	4.34854618344675	-0.0915746769543394	0.999525485637656	-0.0916181510828796	0.927001429625372	0.977751798118941
DICER1|DICER1	4816.53890338527	0.649731422624437	0.369498676890017	1.75841339431327	0.07867719572551	0.324528236902077
PCMTD1|PCMTD1	2155.93566439929	-0.011114911773529	0.385717960955147	-0.0288161633593762	0.977011209736499	0.994065377175207
IPP|IPP	254.190090430588	1.0485823777836	0.467113173393667	2.24481439940015	0.0247800499882099	0.176870473110634
SLC9A3R2|SLC9A3R2	12.2216855463884	0.0185335017400805	1.28818560380915	0.0143872914627187	0.98852099828587	0.998815985354204
HDDC2|HDDC2	377.020665715157	-0.04798404566825	0.418049565303937	-0.114780757237156	0.908618901737907	0.971013576868203
PPP2R1A|PPP2R1A	2212.33130665933	-0.119714642988643	0.303021933120728	-0.395069233951943	0.692791793626333	0.880238604802425
MIR6891|MIR6891	181.435675666571	-0.0443809051536597	0.902514113499844	-0.0491747491699113	0.960780034158286	0.988780027150434
TTC25|TTC25	26.8858552824415	-1.1444472115508	1.11396353719158	-1.02736505580431	0.304248599491117	0.626141096309144
SMYD4|SMYD4	306.601454500334	0.788538153930075	0.389496450109762	2.0245066513645	0.0429180483033403	0.238444316755381
GPR108|GPR108	718.678506837699	-0.0288078640149944	0.397135500312254	-0.0725391308315267	0.942172865575751	0.982598676831725
COPS2|COPS2	2527.74639071298	-0.845769816193822	0.391128686523512	-2.16238247240651	0.0305887074620775	0.198785844610806
TMEM161B-AS1|TMEM161B-AS1	52.3433991653186	3.65281953487498	0.874720536227104	4.17598465291616	2.96699823648329e-05	0.00225122639525523
CCDC181|CCDC181	25.8242846811941	3.83966719242913	1.19664925233568	3.20868223076617	0.00133344777706594	0.0310567809687173
BCL2L1|BCL2L1	645.352455047871	1.59776965909466	0.371801658133733	4.29737098837779	1.72835792730492e-05	0.00150543502729335
KATNA1|KATNA1	441.05048791614	-0.194636165239883	0.23475537034229	-0.829102077435287	0.407046648322715	0.713370033102566
SASH3|SASH3	3455.63363904418	0.263964664451993	0.308429961497061	0.855833405972488	0.392089934434653	0.702102954876062
MUL1|MUL1	460.918807697676	-0.544969609468377	0.321060587348447	-1.69740426244509	0.0896202572687341	0.346911997377912
SLC15A3|SLC15A3	331.540266442693	-0.191906410282033	0.811138682158515	-0.236588902123805	0.812975730629192	0.931422164505842
C1orf116|C1orf116	14.2041395837817	0.499909934399589	1.25885683862554	0.397114206366315	0.691283244304306	0.879692960470733
SLC43A1|SLC43A1	205.167026450714	0.339469636812343	0.536674660638568	0.632542696181	0.527032318226816	0.790217158519622
FTO-IT1|FTO-IT1	22.3782002777629	0.021945585502066	0.67753019115365	0.0323905647137268	0.974160586809265	0.993412189341021
SORT1|SORT1	800.288085976973	1.55003562888335	0.929641627657889	1.66734748398526	0.0954453298573532	0.356142100947469
FLJ26850|FLJ26850	6.19773354109143	-1.8962151197946	1.25497828053837	-1.51095453140523	0.130800035793758	0.420156351732663
GCSAM|GCSAM	144.306228275898	-0.0646901537855155	1.1238533525091	-0.0575610275496257	0.954098293684934	0.987211762081409
PCDH11X|PCDH11X	4.31527883977368	2.30293013288402	2.53536924782713	0.908321395338249	0.363708441792886	0.678530271914343
CHMP6|CHMP6	205.147667754612	0.709156660727136	0.317169227451659	2.23589364713896	0.0253587385572872	0.178746649318748
SIRT1|SIRT1	974.65314011296	-0.913907361090207	0.334651885174966	-2.73091950643693	0.00631578952678414	0.0823077548101212
TMEM171|TMEM171	16.5687043794327	4.32049623581397	2.39263508211546	1.80574809259838	0.0709576967967752	0.309343666934256
USP22|USP22	3561.81844063031	-0.224170871334778	0.329367740097177	-0.680609677403861	0.496118501858048	0.773068187634228
MAPK7|MAPK7	258.861424140444	-0.944677334939798	0.50833555089251	-1.85837353551445	0.0631159877587843	0.291623533378645
AIF1|AIF1	584.399305773863	-0.594833828313057	0.78898373216469	-0.753924072275921	0.450894815062074	0.741929017496851
APBB1|APBB1	822.538438264111	-1.30360884699323	0.716225474594253	-1.82010957894473	0.0687423191565578	0.30458574426181
ARPC5L|ARPC5L	507.859660157399	-0.635141143614306	0.390922066828074	-1.62472573822147	0.104221010603795	0.371166696103556
SIGLEC11|SIGLEC11	21.0432660551393	2.67512149142362	1.48162011692301	1.80553804640507	0.070990527451657	0.309407782653737
TRNP1|TRNP1	14.0063804743647	-0.768983850522694	1.23906587154272	-0.620615794675435	0.534852444886265	0.795244812671862
KAT8|KAT8	594.113147484791	-0.385459953114129	0.312373898088795	-1.23396978900125	0.217214161976861	0.535270207738325
PRH1|PRH1	22.3621347388297	0.713425591364709	1.278639424688	0.557956823158956	0.576873868029117	0.820725657148598
ENOSF1|ENOSF1	494.021973904439	0.159238247284115	0.470137221100858	0.338705892954504	0.734831300876501	0.899111462691633
PNPT1|PNPT1	856.122193774477	1.04749840969547	0.334966925836266	3.12716966631951	0.00176498038500138	0.0367018715934905
TMEM150C|TMEM150C	9.44101788173859	0.641704887573143	1.20657878605051	0.531838363969278	0.594837949352886	0.831156774541862
B3GALNT1|B3GALNT1	53.1764671672257	-0.349481209374966	1.61408435582926	-0.216519792235652	0.828582599071519	0.938781665207657
PRDM5|PRDM5	60.8502765993805	4.11280146317339	2.06528892087713	1.99139278848535	0.0464377214538438	0.248366159354643
RPL36A|RPL36A	7255.09462260825	-1.11445788098164	0.44034438489832	-2.53087792010561	0.0113777441242568	0.115757358575275
TDRD6|TDRD6	25.5008042355045	0.628687467048875	1.20257465476014	0.522784564401345	0.601124182344281	0.834339554172788
PROSER1|PROSER1	689.991360571292	0.119506137635532	0.303351707247965	0.393952414903818	0.693616171489025	0.880407203092395
CBWD5|CBWD5	513.245300922033	0.237022655823939	0.32666746022391	0.725577796029866	0.468097637036261	0.75289216305047
PLEKHA4|PLEKHA4	10.9862437392312	4.40676627626311	2.11014715250513	2.08836917891317	0.0367645454972758	0.219379350132643
C1orf177|C1orf177	8.10735613351648	4.47770332247447	1.5043275098162	2.97654818731698	0.00291513266575747	0.0512720564342244
SCAPER|SCAPER	957.437063570342	0.0307086621616392	0.438228297382614	0.0700745760715396	0.944134302302006	0.983658486528523
SLC37A3|SLC37A3	463.378379793927	-0.4151814502022	0.388504450013195	-1.06866588063045	0.285220250994449	0.607679264609771
DVL2|DVL2	436.368992889127	0.231552323338736	0.430005937206129	0.538486340079854	0.590241333144962	0.827232401794263
NOP10|NOP10	777.999177497393	-0.501197896538161	0.330289546216348	-1.51745007457749	0.129153089423091	0.417656536914045
DNAH3|DNAH3	14.5569641984802	0.965550233736572	2.27453960264272	0.424503592997338	0.671198585533871	0.869994856292934
ATP5F1|ATP5F1	2465.09413742622	-0.247211217418394	0.309843819393487	-0.797857507380025	0.4249531846627	0.725837113546937
LOC100289561|LOC100289561	82.6169917019531	-0.683901476213816	0.546066461294019	-1.25241435739007	0.210418917367275	0.527654488439208
DDX47|DDX47	928.241780011429	-0.740437953823481	0.350808015394367	-2.11066429879347	0.034801176694583	0.213637428453765
GLDN|GLDN	15.6551283465648	2.40432607818726	1.88980240127871	1.27226321469398	0.203279613862476	0.518599520885115
AFF4|AFF4	3336.24722022023	-0.376906039702695	0.286120510720571	-1.31729822078637	0.187738681378775	0.499497834142564
MED25|MED25	360.347026172789	0.526679108326112	0.433305523673016	1.21549133244735	0.224178752605083	0.542779025376226
CNEP1R1|CNEP1R1	478.590038541582	-0.591801496629836	0.337501066699658	-1.75348037390495	0.0795195854544876	0.326019495099643
MRPL10|MRPL10	968.224819573372	-0.694207979619274	0.514009939468885	-1.35057306544808	0.176832233685043	0.485350465188272
BAZ2B|BAZ2B	1672.1038363973	0.249330335079376	0.564674147515794	0.441547282049781	0.658816839546669	0.863875458322282
SNORD103B|SNORD103B	10.9281026508062	0.243949618738777	0.655649829698806	0.372073029975228	0.709838476060028	0.888312744707286
MTRNR2L9|MTRNR2L9	339.444467383238	-1.05887206537656	0.948062097269785	-1.11688049593575	0.264045425023235	0.586217357781774
RNF138P1|RNF138P1	76.3652520783949	1.14930906510328	0.867837614294786	1.32433654196612	0.185391299578172	0.495773993468371
TMEM179B|TMEM179B	390.993146149879	0.00206066784122164	0.32710906692826	0.00629963534967857	0.994973651461272	1
BTBD9|BTBD9	1039.37105913258	0.0108135701362851	0.331639306624965	0.032606418842003	0.973988451058024	0.993412189341021
MMRN1|MMRN1	130.558803234742	2.56909143935201	1.31011255049449	1.96097002382148	0.0498825198095952	0.258686020106139
ZNF222|ZNF222	55.5550494194711	-0.578053851467512	0.761374009536624	-0.759224565360877	0.447718233468643	0.739783747752291
MIR3064|MIR3064	190.935175385577	0.602964079918076	0.514505862214512	1.17192849333694	0.24122576625798	0.561522536345274
KIAA1217|KIAA1217	91.8363972118758	1.25534534252661	1.19745173061866	1.04834734497234	0.294478603801476	0.616397587555028
FAM162A|FAM162A	384.125337804924	-0.570667462100732	0.421261446635788	-1.35466339646817	0.175524824984402	0.48362811687116
NUPL1|NUPL1	1252.89538257608	-0.209501235952153	0.331929214556228	-0.631162388740761	0.527934351419237	0.790875449211419
KIAA0825|KIAA0825	146.991149619461	0.945774496729538	0.815434263864718	1.15984149629313	0.246113345674812	0.56696651714396
CCL21|CCL21	95.6601066942848	0.871550202506995	4.54953098936519	0.19156924187225	0.848079637662921	0.947478714752231
SLC2A12|SLC2A12	98.581623535029	0.318112836548351	0.41347785106396	0.769358831990115	0.441680320697648	0.736590832274617
TMEM56-RWDD3|TMEM56-RWDD3	23.5684361550681	-1.55801287343685	0.979111853350905	-1.59125116104429	0.111553063220796	0.38621656769528
GNPTAB|GNPTAB	1780.27103966254	0.865773531150534	0.508110219064997	1.70390891319544	0.0883981055739991	0.344236418421376
PRKAG2-AS1|PRKAG2-AS1	27.5075615806048	-2.34539689604188	0.804899639355809	-2.9138997973946	0.0035694445768215	0.057815519749048
ADIRF|ADIRF	15.5356456304334	-1.42229849684291	1.2210787988812	-1.16478846258413	0.244104630165455	0.565185607848828
NEU3|NEU3	213.514882323226	0.284880493056732	0.30563316456084	0.932099412267881	0.351285151758676	0.6670159171198
STAR|STAR	14.5425361628729	0.340778434264784	1.00039217036392	0.340644843452559	0.733370966145563	0.898690805368267
PPIP5K2|PPIP5K2	1834.7798937919	0.684858481472691	0.376603393628834	1.81851383460358	0.0689856341631256	0.305109519801264
UBE2F|UBE2F	583.856292903527	-0.44283205392772	0.436859583821207	-1.0136713725135	0.310739588516845	0.632814550876216
TIPARP-AS1|TIPARP-AS1	59.5973247722946	-0.678606074898823	0.509817817314705	-1.33107563496536	0.183164125152966	0.492996236923769
LAMP3|LAMP3	199.593349218689	-0.415254995307798	0.976256909665925	-0.425354218952364	0.670578474324924	0.869521169199082
ZNF345|ZNF345	153.776598870609	-0.438161163494897	0.388036883327303	-1.12917400979462	0.258824435324061	0.581198726076148
SIGLEC5|SIGLEC5	169.699037239325	0.83065620948851	0.845642562159127	0.982278147598966	0.325962837108028	0.645327755318898
RGS13|RGS13	1174.74693521087	8.63510487871796	1.53208131623396	5.63619227466601	1.7385126567042e-08	4.71109334527842e-06
CLMP|CLMP	22.6901355904237	-0.401966942615337	0.801723657705245	-0.501378422293136	0.616104822762758	0.84201845357716
GOLGA7B|GOLGA7B	260.451766908935	2.05162703499843	0.891316027591643	2.30179529088238	0.0213467192539411	0.164751894712153
KCNIP2-AS1|KCNIP2-AS1	7.06709897361227	3.99742575564511	1.29078655831792	3.09689137207496	0.00195561522279157	0.0393997136134937
C11orf24|C11orf24	128.532188901313	0.651440803898848	0.503972325242212	1.29261225521811	0.196145198848182	0.510110840115161
RGS10|RGS10	1261.50525857228	-0.790299445757501	0.578845562280479	-1.36530276338987	0.17215791081649	0.479005494062346
TLR8|TLR8	791.881591700772	0.980745124518562	0.86368780111225	1.13553198650666	0.256152487666623	0.578402983394988
ENHO|ENHO	11.5894262453117	-1.19284159404755	1.4608283228474	-0.81655152449571	0.41418476719997	0.719104394117978
OR2W3|OR2W3	6.46374732058857	1.27319477016414	2.02862227072202	0.627615494781584	0.530255855741312	0.792482532540985
CRYBB2P1|CRYBB2P1	132.106586802789	0.12864756456049	0.375572542049163	0.342537193636615	0.731946658484464	0.898293282179296
GPR68|GPR68	345.096888870593	1.10087542955236	0.682400861287664	1.61323862850209	0.106692674133895	0.375782613701563
SOWAHC|SOWAHC	339.5366522083	1.99158874928567	0.846179029657801	2.35362574524103	0.0185913186487996	0.152152920408584
TICAM2|TICAM2	14.0299281172977	5.09675951900778	1.89468862091968	2.69002487413146	0.00714466933773245	0.0887533932760544
NDUFAF6|NDUFAF6	152.482337065083	0.0796275412665608	0.354330304899361	0.22472687254108	0.822191757994646	0.935648117231849
ADAMTS1|ADAMTS1	23.8510068617938	2.12113464351758	1.77709484008642	1.1935967601	0.232635741959381	0.551242831991446
C5orf67|C5orf67	4.62047161318885	0.508986701541426	2.30091201934306	0.221210849116581	0.824928262131882	0.936879676098689
GPRC5B|GPRC5B	6.83569748661026	1.68233391777916	2.42024337737667	0.695109398296408	0.486986745387065	0.767171515848295
FLT3LG|FLT3LG	751.963964055894	-1.03326982060905	0.480262793867415	-2.15146755860148	0.0314393137609317	0.202540363972312
NDUFA8|NDUFA8	193.416548958345	0.36194200269482	0.44932066095044	0.805531626186988	0.420512963640925	0.723322811234273
RBM48|RBM48	365.654099080633	-0.46755407022675	0.344417604567126	-1.35752082363614	0.174615781496393	0.482916024899794
OLR1|OLR1	46.6986701936196	-1.09218327800669	1.62533401299245	-0.671974664454259	0.501599825556162	0.775662338939747
MGRN1|MGRN1	937.270949938537	-0.300414734002907	0.359746132451387	-0.835074256270157	0.403675900396649	0.711496486844062
VPS9D1-AS1|VPS9D1-AS1	38.6564408484833	1.58697526066957	0.745465432090615	2.12883816251411	0.0332676523427929	0.208038593698227
PRORSD1P|PRORSD1P	39.8796467513085	0.735888484245183	0.539393362107301	1.36428909946206	0.172476595261991	0.479485496549862
MAP4K1|MAP4K1	1750.18897407117	0.30428393941371	0.448679640493284	0.678176391242483	0.49765985969545	0.773414418414012
TP53INP2|TP53INP2	542.513349536285	-0.0333238853445584	0.857084052728713	-0.0388805336401542	0.968985636737152	0.99170933226201
LOC440600|LOC440600	8.67192628659451	-0.584546081883061	1.25970040654336	-0.464035796802723	0.642622099033615	0.85662443671682
DUSP6|DUSP6	3177.93175912517	2.72241444308308	0.815474822321473	3.33844083050042	0.000842499713982648	0.0228667012990648
WWP1|WWP1	2172.57634725896	0.23760112608322	0.388267211649103	0.611952590779033	0.540569124924116	0.79936323660982
TFAP2A-AS1|TFAP2A-AS1	69.5869000908508	4.05740201765758	1.3599389351592	2.98351779830658	0.00284955462021122	0.0507744161774735
FLNA|FLNA	57032.3244277781	0.423449589324943	0.387795901733024	1.0919393099117	0.274859777870374	0.59601246383882
EXOSC2|EXOSC2	526.722154152648	0.104661459004578	0.206225816361589	0.507509005667208	0.611797719152475	0.839279653414795
SUCLG1|SUCLG1	726.820609099281	0.136972659823023	0.242775348298721	0.564195091399832	0.572621368052628	0.818126370022133
MIR4722|MIR4722	5.46198374688721	1.07190512757205	0.974170448980713	1.10032605556205	0.271190083540572	0.59302640017992
RGPD4|RGPD4	183.803751055989	-0.961688079494534	0.405831409782879	-2.3696738505505	0.0178037827510662	0.148615866568723
LOC283045|LOC283045	107.086145808924	4.67864226365818	1.47748894192078	3.16661744863945	0.00154223054088986	0.0341934542780152
TMEM180|TMEM180	103.812855123076	0.317303780378096	0.411358319660519	0.771356175900264	0.440495843503532	0.73568235573198
COG8|COG8	409.321741198332	0.426013391996965	0.298091514558126	1.42913625913996	0.152965073691175	0.450945302069576
NBAS|NBAS	2157.03775048502	0.593981503849277	0.264448979026455	2.24611002861863	0.0246969611486159	0.176634487108995
SON|SON	11847.8319785608	-0.261889626863411	0.29752469933004	-0.880228187619813	0.378735706354953	0.690788031932881
ABCC4|ABCC4	522.320138131714	1.9461956829466	0.567011743116407	3.43237279751901	0.000598324483006426	0.018272979559724
ZNF253|ZNF253	320.156933279487	-0.0394344978824689	0.631600184837603	-0.0624358555129433	0.950215742076565	0.985786800213506
SPRED1|SPRED1	113.518662409597	2.19872069801121	0.8483229721154	2.59184387348185	0.00954630836375936	0.104537893769147
PRR34-AS1|PRR34-AS1	52.6787039521057	-1.0038190115119	0.847223885882229	-1.18483322795675	0.236083392023917	0.555664072509174
LCNL1|LCNL1	7.58133550262011	5.02702193341158	1.87849986133084	2.67608320708106	0.00744881496416096	0.0907681435175988
ATP6V1C1|ATP6V1C1	733.795633198804	1.21678804612029	0.400998009732549	3.03439921542713	0.00241015268742662	0.0453650790294898
PPARGC1B|PPARGC1B	306.714792196141	0.936527400304935	0.527577190518268	1.77514763173316	0.0758735139425619	0.319542395137139
DMTF1|DMTF1	2891.97272274851	0.252146477589993	0.375578382955725	0.671355139253893	0.501994316090998	0.775847220745799
PRDX6|PRDX6	1169.57941332307	-0.211255492833409	0.335925860497931	-0.628875349222215	0.529430665527337	0.791803795171502
TENM4|TENM4	8.61951533191508	-0.769243079358024	2.18389186017547	-0.352234967942148	0.724662054606041	0.894859355966317
HNRNPR|HNRNPR	3806.32566761034	0.0322894064729542	0.215653213507741	0.149728380800573	0.880978915942567	0.96067544238208
URB1-AS1|URB1-AS1	60.1685980998454	-0.496143095131093	0.566045042490425	-0.876508153747298	0.380753845694207	0.692231910500168
DDX18|DDX18	2566.90937575048	0.062988663991545	0.3367033204547	0.187074674245808	0.851602084623364	0.948412979185417
SCRN2|SCRN2	263.722094151007	-0.522309543548902	0.404724191999805	-1.29053205583805	0.196865989311312	0.510440934050883
ELK1|ELK1	738.15500592391	-0.49693711257828	0.450973916444538	-1.10191985491337	0.270496515905227	0.59212170667579
CAMK1D|CAMK1D	946.80969942825	0.418339529040604	0.480519539876509	0.870598371812549	0.383973485797708	0.695167157317937
PKD1L1|PKD1L1	11.8058136329194	4.03167951624932	1.96144982342806	2.05545891008473	0.0398347005371676	0.229052882307351
ADD2|ADD2	42.7875886598632	1.28395049982428	1.61054561145457	0.79721461515435	0.425326399361878	0.725837113546937
MCM3AP-AS1|MCM3AP-AS1	126.640760447784	0.753390265066229	0.501782989656515	1.50142647438477	0.133245290635109	0.423383075512361
PTOV1-AS1|PTOV1-AS1	148.833079832734	1.15615411527214	0.376890652413322	3.06761154162091	0.00215776914754357	0.042003916632684
ADCY4|ADCY4	92.8757509983481	0.820557834176762	0.762465730828689	1.07618978925772	0.281842385369877	0.603867118854737
SLC26A11|SLC26A11	440.328896873005	0.769545822109078	0.552850260385133	1.39196067588534	0.163934306330382	0.467220248004862
RALY-AS1|RALY-AS1	22.7003070779547	-0.374550502301318	0.48671198975277	-0.769552651644301	0.441565300736729	0.736531784482407
CD3G|CD3G	1808.02059550795	-0.105606868801178	0.647976150564164	-0.162979561376188	0.87053452715363	0.956355562906485
LOC286437|LOC286437	87.2844302760398	0.705893929820076	0.528826512706669	1.3348308242095	0.181931722513496	0.491266547037987
MASTL|MASTL	952.263370232943	-0.172354830297371	0.514107682241977	-0.335250447038152	0.737436170370758	0.90018605750276
RPS27|RPS27	34551.7011304593	-1.28790969651171	0.474667374942779	-2.71328885130766	0.00666190086745513	0.0853843630699654
ROPN1L|ROPN1L	15.8551376262662	3.65363021509908	1.54192477145133	2.36952559732219	0.0178109221532104	0.148615866568723
C6orf201|C6orf201	29.734390927442	-0.234284008951303	0.873039270642998	-0.268354490833788	0.788426466163059	0.921746084517323
MICALL2|MICALL2	14.8847597942574	1.08825536545303	1.21097619276884	0.898659587159008	0.368834009093727	0.682133539403109
BATF2|BATF2	28.1458861051276	3.01538764523105	1.56663781450443	1.92475096497329	0.0542605211780205	0.270384009793102
GLB1L3|GLB1L3	59.8414413460946	5.05217624730937	1.26632716699746	3.98962951990393	6.6176576196307e-05	0.00418432040304946
ARPC1B|ARPC1B	6319.05548927325	0.834971086058463	0.476162273851787	1.75354313415926	0.0795088222977164	0.326019495099643
MRS2P2|MRS2P2	181.343237614589	-0.592487242626867	0.729926535696527	-0.811708046839933	0.416959175919463	0.720500243236483
GNA14|GNA14	4.96193013016649	2.36093108946656	2.11284412615227	1.11741848830377	0.263815433712061	0.586217357781774
LOC100505549|LOC100505549	160.318162885734	1.6354592754078	0.531692033755728	3.07595218956988	0.00209831488213209	0.0415214422731272
DCAF16|DCAF16	1388.26301025394	-0.396559696349455	0.286117860133027	-1.38600119602838	0.165746538280485	0.469881252328867
OPTN|OPTN	3926.35479871885	0.745820159695656	0.368928632109118	2.02158383704701	0.0432193632212175	0.239170492354173
FAM20A|FAM20A	112.246932091109	1.68367735168899	0.688867666641027	2.44412306343065	0.0145204725641869	0.132331079675278
PPP1CA|PPP1CA	3111.38390342172	0.714074609250983	0.422668208740208	1.68944480442315	0.0911342209438968	0.34894289179533
SNRK-AS1|SNRK-AS1	54.4320772748296	-0.284190475748368	0.620152529960096	-0.458258996003217	0.646766379266861	0.858189740579673
ABLIM2|ABLIM2	21.2861521219508	-0.711608653191917	0.790847554922484	-0.899805087292286	0.368223986584427	0.681976525884129
RPL39|RPL39	18754.6949923351	-1.33685756286092	0.454617174184111	-2.9406226574263	0.00327553288638692	0.0549311369709208
BRD4|BRD4	1522.46935732168	0.100832360181414	0.33424784270319	0.301669441950452	0.762904065405628	0.911247806477389
FAT1|FAT1	103.944214503692	0.663008166165818	1.78177253449862	0.372105952543703	0.709813964575915	0.888312744707286
MRPL47|MRPL47	765.574325461334	0.0589536058872642	0.454633370546827	0.129672852250937	0.896825261950229	0.965907568734737
MGAT4B|MGAT4B	954.593561576101	0.423054121966291	0.425580721033388	0.994063173113289	0.320192112898222	0.639784615098133
ARL14EPL|ARL14EPL	12.5973050839832	4.72060039408025	2.2571806992487	2.09137017503804	0.0364948936070144	0.218476266647057
TRIM58|TRIM58	155.205056095197	3.55159630767262	1.3628793172864	2.6059506976334	0.00916196483812867	0.102297621789753
ATPIF1|ATPIF1	624.366190391298	-0.0748394637736543	0.262035439832294	-0.285608175068046	0.775178241373107	0.917001993521887
SELENBP1|SELENBP1	8.7530376094486	0.986838929144612	2.60678503693533	0.378565518507345	0.705010531800922	0.886429503528159
LOC100130691|LOC100130691	69.458498334967	0.501630866187139	0.565788069732355	0.886605591426547	0.375291282454995	0.687812428778494
CYCS|CYCS	2432.99390024388	-0.131697242884616	0.417586854549876	-0.315376888543521	0.75247551241551	0.907812838222329
ADAM23|ADAM23	37.3734100002257	-2.54187443112357	1.68951777483841	-1.50449700439919	0.132453444090942	0.422465136098157
DNAL4|DNAL4	87.2717401671083	0.146050533848149	0.503295253796709	0.29018857767163	0.771671974133642	0.915559381639414
ZSWIM6|ZSWIM6	797.264118412199	0.628524406134027	0.35937090728853	1.74895739578997	0.0802983841111207	0.327563809825651
GPATCH1|GPATCH1	220.781095019106	0.171932262515696	0.310292936780402	0.554096604001576	0.579512734145975	0.822868904127697
RPL31|RPL31	18465.6526368027	-1.49525169349636	0.493278469677699	-3.03125270087976	0.00243541329095559	0.0457900613471298
TBC1D16|TBC1D16	249.069197268026	1.41037947013345	0.815577903352569	1.72930073796243	0.0837552846398046	0.33494266089734
UQCRBP1|UQCRBP1	62.5664575259515	-0.624747565704687	0.429348991465201	-1.45510430471181	0.145640387635086	0.440689949965649
CYP4F35P|CYP4F35P	5.75492194241341	-0.454498183160832	2.1047548846224	-0.215938771056645	0.829035475041794	0.93892438080918
UQCRFS1|UQCRFS1	1312.8802659768	-0.693746732438025	0.341208418259235	-2.03320520629988	0.0420317952940185	0.23580900731498
TMEM88|TMEM88	21.2709171038586	-0.306211699354494	1.14897921586844	-0.266507605294713	0.789848302968506	0.921959480719771
CCL14|CCL14	4.6121855276671	0	5.19606456138113	0	1	1
EIF5|EIF5	5968.61702869656	-0.162456896436348	0.401879816447882	-0.404242486901345	0.686034413501873	0.877564776510114
CMTM3|CMTM3	1060.5243829091	-0.573382425457368	0.335219497194439	-1.71046860417187	0.0871792542889697	0.341816236971984
SHCBP1|SHCBP1	223.356670809468	1.19324234075519	0.857437757848938	1.39163727026517	0.164032266776494	0.467271626632455
HLA-A|HLA-A	43842.9610486347	-0.485553998439407	0.445400111271909	-1.09015239590496	0.275646019009795	0.596958489393724
AFAP1L1|AFAP1L1	7.53846399629599	0.430805953830012	2.29939172256946	0.187356486327004	0.851381137308795	0.948412979185417
DIS3L|DIS3L	754.213222680909	0.24298084412634	0.262883316698922	0.924291610352072	0.355334509642981	0.671022007027468
LINC01336|LINC01336	12.7033685921397	-3.03824954391029	1.34785193291823	-2.25414191997499	0.024187241210426	0.174893935596947
SNORD15B|SNORD15B	724.639729990408	-0.917661857634742	0.580147775545243	-1.58177260400989	0.113701491286797	0.39001490339259
ZNF526|ZNF526	217.749669331028	0.410722764118164	0.331660378723715	1.23838357086455	0.215573869490324	0.53391514579121
ARPC2|ARPC2	7742.08176785642	0.145829981989958	0.275409369582864	0.529502617179773	0.596456829371232	0.831795442770981
IFITM3|IFITM3	932.04495744002	1.97526971793464	0.71810397335824	2.7506737063398	0.00594728503292879	0.0790235583852121
NOL9|NOL9	1328.31906271204	-0.246518258480244	0.312255464417651	-0.789476203210709	0.429833732897263	0.72840684639597
SGCE|SGCE	252.808378803917	1.50972840468045	1.82019405221065	0.829432665625332	0.4068596237672	0.713370033102566
GTSF1|GTSF1	525.958214261903	3.70910716310591	0.90131564194353	4.11521446039466	3.86819588806067e-05	0.00275861051257269
TTLL7|TTLL7	34.0440259276268	5.27752253472696	1.90392527963996	2.7719168347431	0.00557272721678641	0.0758068518286675
PIFO|PIFO	7.27739728868827	-0.424004059032179	1.88683838291198	-0.224716681021619	0.822199686897388	0.935648117231849
ASPRV1|ASPRV1	36.363798250511	-0.926898985827354	0.573522643200943	-1.61615063819302	0.106061748139259	0.374495587225115
CA2|CA2	115.179642502754	2.5473552578085	1.0158758336776	2.5075458765337	0.0121572798921621	0.120808546169378
MLLT3|MLLT3	1031.5642589589	-0.473213983850952	0.401639320941356	-1.17820631391827	0.238714366048033	0.558570676695726
SPAG1|SPAG1	149.930770506334	0.0279898081080945	0.495824323439597	0.0564510589434693	0.954982482616125	0.98766953069743
EXOSC3|EXOSC3	290.126763220983	0.238241707231472	0.370943156987345	0.642259340127413	0.520704809651962	0.786470185824852
POGK|POGK	1251.9320098395	-0.192187521336592	0.265865394346623	-0.722875279834378	0.46975651214417	0.753960232273301
DUSP5|DUSP5	666.609222255432	-1.80400534985805	0.904980887044292	-1.99341817676394	0.0462156751235698	0.24777117963592
ANKRD13B|ANKRD13B	66.8853075368045	1.92005294439882	0.727187849849571	2.64038094805353	0.0082812882545654	0.0968343514259866
PTPN6|PTPN6	4815.02776348999	1.27526564609056	0.447550576880221	2.84943358799839	0.00437971483194299	0.065473285123407
ZNF324|ZNF324	305.067355615949	0.24741981426156	0.448453803673408	0.551717506318102	0.581141913898739	0.823475369601066
TBC1D10B|TBC1D10B	620.90519746775	0.24998791915932	0.405900308723628	0.615885018529347	0.53797040995594	0.797034699190125
PDHX|PDHX	450.562185107477	-0.368002195764251	0.193616297899324	-1.90067778258834	0.0573442303727605	0.278673697957235
MKRN3|MKRN3	19.5728928702676	-0.707817540200507	1.60325170871224	-0.441488717182804	0.65885922793872	0.863875458322282
LOC100652999|LOC100652999	45.171096900308	5.61884006740521	2.97178795132765	1.89072711762459	0.0586607805820962	0.281229105896531
TFAP2E|TFAP2E	99.1144189900141	2.28951324215511	0.619668206613694	3.69474053649876	0.000220111438038516	0.0094653462725278
ACSL6|ACSL6	1667.16347795123	0.861938872937381	0.879350035570859	0.980199963690029	0.326987422453894	0.645971381103297
LMBR1|LMBR1	974.372846930195	0.0145672297978942	0.40870926566085	0.0356420346241482	0.971567790816644	0.992569408398641
DOCK2|DOCK2	9622.68546063584	-0.0548728936394355	0.283333297124782	-0.193669061124394	0.846435018784853	0.946384088067
GRIN3B|GRIN3B	10.3792054506975	0.555835718027729	1.47479386716593	0.376890445778612	0.706255021937708	0.887054477316501
USP12-AS1|USP12-AS1	11.6344411240806	0.538154252795879	1.44317364726473	0.372896396643503	0.709225553977071	0.888196791189594
ABCB6|ABCB6	63.3477015907096	0.193591228417139	0.635123838527188	0.304808632070975	0.760511906751237	0.91048471394818
ARHGEF4|ARHGEF4	22.9870384621947	-0.72848843479806	0.785627748270655	-0.927269226935567	0.353786767667006	0.669606174901454
CCT8|CCT8	3131.89458353645	-0.41107941009308	0.345606589893939	-1.18944320540657	0.23426530765459	0.553061623034768
AOAH|AOAH	1320.04223076845	0.114111542126801	0.746538251301438	0.152854246822411	0.878513217551008	0.960007695088609
LOC389906|LOC389906	234.495349048784	-0.20974538090766	0.551308700443151	-0.380449974286753	0.703611424314063	0.88571407136777
MRPL17|MRPL17	319.235548953236	-0.468419250237652	0.392594043166279	-1.19313896476839	0.232814953595751	0.551264478195098
ESR2|ESR2	59.4967734200821	0.860513372125466	0.622656147195227	1.38200413824175	0.166970430473456	0.471940263086563
COLGALT1|COLGALT1	983.085388970186	0.676154699627881	0.408443921486698	1.65544072039741	0.0978351317469552	0.361133269012761
CDA|CDA	80.8117421313587	-0.969968479991252	1.05384405708514	-0.920409877979594	0.35735860861156	0.672820178753067
ZCRB1|ZCRB1	672.284873343592	0.359123115741969	0.360103366081957	0.997277863990405	0.318629655314647	0.639068218186515
ZNF32|ZNF32	419.005448135227	-0.111542205662464	0.384685849147892	-0.289956612413839	0.771849430578843	0.91564265713585
ZNF281|ZNF281	2196.34840672947	-0.716650026117819	0.499636958630668	-1.4343415028422	0.151474832108712	0.449154716762137
ZNF148|ZNF148	3015.63628220894	0.0744233024836713	0.343874296659045	0.216425895179548	0.828655783116707	0.938802278145094
LONRF3|LONRF3	142.48130766205	-1.5247461596311	0.972012828248307	-1.56864818582579	0.116729938033075	0.395635001409701
SMC5|SMC5	3232.05872400619	0.0391068346797986	0.286194119824578	0.136644438061023	0.891311849427786	0.963999550079454
LINC00239|LINC00239	66.2246555163306	0.589199364800741	1.0052321797314	0.586132613619847	0.557786401276694	0.80972693327029
LOC729218|LOC729218	231.169006041191	-0.0782369628326557	0.487072556848122	-0.160626916324196	0.872387254005709	0.956790132364478
FAM104A|FAM104A	1351.9799947828	-0.426645971553381	0.223549559526267	-1.9085073236445	0.0563256775113389	0.276002286588283
CUTC|CUTC	373.395399774551	-0.0792270340116802	0.285228634794865	-0.277766760930788	0.781191408383681	0.919314794507907
ZNF440|ZNF440	258.524227582025	0.398902025478404	0.704304743380575	0.566377025325322	0.571137509309251	0.817122588597862
CSNK1D|CSNK1D	1424.70283086542	0.343326985334652	0.527260042736293	0.651153050689953	0.514947693812733	0.784170227150842
ZNF24|ZNF24	3340.01206702359	0.0154445530028573	0.335132894952235	0.0460848613653954	0.96324261206869	0.989502102547446
ADAM9|ADAM9	502.148051482832	0.282832643502346	0.588748844728384	0.480396090854037	0.630945773446216	0.850497002423809
SLC35A4|SLC35A4	612.078060445703	0.161336828021479	0.405625994035247	0.397747753827285	0.690816132865164	0.87952964578075
LINC00339|LINC00339	149.527516122058	0.305897283026729	0.455330805163271	0.671813282909866	0.501702571491426	0.775695687760236
PKDREJ|PKDREJ	11.5097652091878	0.548155776632947	1.09826480706372	0.499110754626177	0.617701361515395	0.842637044488701
APLP2|APLP2	4684.05461559618	-0.524939007951617	0.519162073519964	-1.01112741998368	0.311955448183248	0.633672966999398
PSTPIP1|PSTPIP1	1325.14973924791	0.128441903828152	0.455899171204537	0.281733137370691	0.778148143334229	0.918138441011954
CLEC11A|CLEC11A	31.0553646513091	-1.66206917256857	0.932683531603696	-1.78202907658371	0.0747444902319685	0.317622290477507
SHROOM4|SHROOM4	16.0087816490148	4.96976941966127	2.0292930486307	2.44901514988912	0.0143247422835551	0.131691976448493
WFS1|WFS1	32.3351331612236	0.313451989804129	0.748985109854825	0.418502298216429	0.675579906588278	0.87323530037374
GPR183|GPR183	4279.05475380229	-0.128488934870438	0.803293713705126	-0.159952620913456	0.872918396604964	0.95715501133244
WDR63|WDR63	23.0283963425479	6.23134511653294	2.23334256264042	2.79014299945361	0.00526847664360095	0.0732438381592471
RRN3P2|RRN3P2	403.01253272652	0.274400872834579	0.449725069972382	0.610152493503266	0.541760796090741	0.800219788100115
TYK2|TYK2	2626.44798629574	0.645844878879136	0.357628880384751	1.80590806364494	0.070932701342839	0.309324679264351
CLASP2|CLASP2	1676.90757540891	0.00437392331310913	0.333996441733356	0.0130957182969063	0.989551427210402	0.999208728061512
JMJD7|JMJD7	156.960487382899	-0.536887094926389	0.419687787011896	-1.279253558339	0.200807781031955	0.515517359064292
S100A6|S100A6	6763.43839914124	-0.452392928061875	0.446322358556873	-1.0136013116722	0.310773031545583	0.632814550876216
UBAP2L|UBAP2L	1961.05398133865	0.163960301019972	0.25926330355976	0.632408438713653	0.527120021158708	0.790217158519622
PIK3R3|PIK3R3	191.94631033398	1.71359128143363	0.887205236944747	1.93144856463505	0.0534276042949905	0.268153055393018
SRSF8|SRSF8	1160.71180994776	-0.118236278379545	0.239115001145177	-0.494474532393553	0.620971088099793	0.844238836458495
SRSF1|SRSF1	4236.97219952802	0.629247679950697	0.228582848638792	2.75282106115073	0.00590841805004177	0.0787174927119655
SCART1|SCART1	65.2051207798929	0.340444695788905	0.643275157433844	0.52923650455741	0.596641396306554	0.831795442770981
ZNF304|ZNF304	276.929614738757	0.428994344625288	0.734964435761615	0.583694018038762	0.559426192585319	0.810126248359601
MRPL22|MRPL22	241.960126860468	-0.493534120123247	0.329893508465514	-1.49604071452906	0.134643045618997	0.425421669968058
REPS2|REPS2	102.142122170661	0.225002033576226	0.878804491302965	0.256031956826512	0.797926161530395	0.925135053483651
SLC4A4|SLC4A4	47.4427194793963	0.532954024393561	1.06091721770941	0.502352130304986	0.615419845450976	0.8416595346678
EEF2KMT|EEF2KMT	88.7417174281124	1.69962581362528	0.597722074969799	2.84350517539636	0.00446202847321402	0.066355183009329
CIDECP|CIDECP	110.596008503589	-0.804346957844223	0.351388225057361	-2.28905495542123	0.0220761595562204	0.167653112074642
LOC400684|LOC400684	14.9853286809128	-0.54725569237919	0.917703179492899	-0.596331912766817	0.55095351590206	0.80630586674399
FAM168B|FAM168B	2406.72527331674	-0.441581692261322	0.313721786822177	-1.40755825961051	0.159261914542181	0.460990065287235
SRPK1|SRPK1	1870.42676543782	0.643042861383273	0.323133821374638	1.99002029143132	0.0465887002860234	0.248812382475182
TARSL2|TARSL2	414.348355397125	-0.138952432502154	0.395919659383616	-0.350961184191966	0.72561746890323	0.8948740467468
DCP1A|DCP1A	2030.93979340655	-0.685861572282264	0.494419610484115	-1.38720543792892	0.165379127746697	0.46915129094244
USMG5|USMG5	794.182745299532	-0.385966870837042	0.360571192880715	-1.07043179948302	0.284424992083579	0.606779633850092
USP8|USP8	1783.6862156656	0.00638069756710249	0.226918223878074	0.0281189296216725	0.977567296387522	0.994347963421025
PHKB|PHKB	1245.66593942136	1.13564074423609	0.39507587191626	2.87448772492186	0.00404683500435568	0.0624097264628367
RNF169|RNF169	2399.52534423984	-0.0754334090216712	0.206302976400207	-0.365643823166846	0.714630869987509	0.891037262062378
HDHD1|HDHD1	178.646666547299	1.80942588566942	0.670448448324324	2.69882925404896	0.00695838674085765	0.0878001318846429
RBBP8|RBBP8	719.364693341948	0.253316538255288	0.484902103137215	0.522407588287169	0.601386573707341	0.834352807322533
ZNF449|ZNF449	135.724506195621	0.634229173505037	0.425282954287419	1.49131106034503	0.135879846430608	0.427379397927322
TACR2|TACR2	20.8650353390745	1.42794473612736	0.878862137926993	1.62476533520434	0.104212569926588	0.371166696103556
CC2D1B|CC2D1B	1174.06807054937	0.51498246050105	0.323819921024096	1.59033594620243	0.111759100160819	0.386332600238838
MAP3K2|MAP3K2	4462.18537372939	-0.221799600890334	0.342482345229273	-0.647623458493463	0.517228520897742	0.785039590039673
MTFP1|MTFP1	343.26710356616	-0.575933635951876	0.560523041866478	-1.02749323923256	0.304188267313185	0.626127574098228
ZNF391|ZNF391	7.94620681229809	0.024925637232632	1.77559556322175	0.0140379024080266	0.988799742262632	0.998922374099512
SREK1IP1|SREK1IP1	1034.89397695939	0.105906442589684	0.41559785761282	0.254829135063417	0.798855071435639	0.925494300808166
CAPZA1|CAPZA1	6821.80932403523	0.415105467842054	0.392753387551076	1.05691123488546	0.290552100508479	0.612549807839129
ZNF764|ZNF764	217.463840236621	-0.185725209770412	0.442148589215331	-0.420051571576907	0.674447779760502	0.872289294999827
BLZF1|BLZF1	841.594476258218	1.36418556731344	0.661148565401482	2.06335707086506	0.0390787154614463	0.226472662432004
SSX2IP|SSX2IP	290.772524152057	0.770392685654651	0.468772592170542	1.64342518850671	0.100294992144171	0.365393961990032
C14orf1|C14orf1	277.530837263956	0.205358962179854	0.432437724824462	0.474886788064604	0.634867668929231	0.851646135643549
ARRB2|ARRB2	2560.60719846975	-0.769111625276631	0.442509453215847	-1.73806823715803	0.0821987908340621	0.331827324927668
C8orf46|C8orf46	31.5738479558439	-0.333761590226645	1.50475048815591	-0.221805271275023	0.82446547578472	0.936781772713983
TTC7B|TTC7B	64.870326254557	3.29314883827842	1.34203810592546	2.4538415293413	0.014133925269531	0.1308537810203
MTERF3|MTERF3	223.470689860768	-0.00957140432270274	0.362771866824297	-0.0263840865238277	0.978950986846661	0.995037583201131
ADPRHL2|ADPRHL2	353.91972448066	-0.158157848652144	0.355491647727809	-0.444898915805869	0.656392806190586	0.863057454350407
ZFAT-AS1|ZFAT-AS1	16.303494046964	3.42681229318629	1.4598241392776	2.34741445971845	0.0189042133471939	0.153609105313324
KIAA0930|KIAA0930	832.996705742308	1.28676948038893	0.556225794725971	2.31339411546505	0.020700980331827	0.162039035408047
KCND1|KCND1	74.793750802659	0.340919275348618	0.860933122668731	0.395988104502046	0.692113803715871	0.879861989261753
MSH3|MSH3	698.908201976031	0.0300266791138356	0.289163804240959	0.103839687656117	0.917296570501181	0.974128331151789
WNT8B|WNT8B	15.1478806699241	0.648070936737033	0.727260737630691	0.891112228673794	0.372868965158188	0.68596038883436
ARHGEF12|ARHGEF12	2495.39716125648	2.42169581775031	0.635581639134696	3.81020417935184	0.000138852068388133	0.00691102773038544
TSSC4|TSSC4	676.081188509471	-0.401586414578436	0.394844349147756	-1.01707524862704	0.309117633863468	0.630722630012804
ST7-OT3|ST7-OT3	7.66889996442246	2.3324144021342	1.47769259884016	1.5784165150214	0.114469953601827	0.391606797439202
BCL11B|BCL11B	6408.17659223605	-1.17965085147876	0.325893954198278	-3.61973837281144	0.000294901035053553	0.0115525038736803
IQSEC2|IQSEC2	80.0353181086653	-0.488199563559987	0.911747973712845	-0.535454508960329	0.592335606242982	0.828949378619574
ZNF687|ZNF687	1217.73620089655	-0.81540677520755	0.382576812842267	-2.13135440475253	0.0330599561533782	0.20802182008971
PLK4|PLK4	404.411341335337	0.575174467642068	0.553766223557542	1.03865935330435	0.298963191316511	0.621960515122165
UBXN10-AS1|UBXN10-AS1	11.9313502813809	-3.36003218378198	3.0013808148037	-1.11949545596124	0.262928828372147	0.58568906027783
LOC100505530|LOC100505530	188.600192649809	2.32495087488093	0.771644729824249	3.01298095486308	0.00258695152040166	0.0475537802797512
TSTD2|TSTD2	395.69807755295	-0.368373374950999	0.329754931109297	-1.11711255905041	0.263946201272603	0.586217357781774
NSUN7|NSUN7	6.87285453981052	4.46876006976072	1.79654389635146	2.48742047374193	0.0128673218357849	0.124248257002556
MAP2K4|MAP2K4	908.984308030077	-0.00914318721761868	0.300407320106954	-0.0304359667879046	0.975719360785248	0.993868888432253
SEC11A|SEC11A	1627.30828097951	-0.785334282800172	0.294734374254963	-2.66454934137004	0.00770915561194793	0.0927362914405931
SH3BP1|SH3BP1	1928.54264956332	0.605870080123277	0.494614515159929	1.22493388599276	0.220600131700083	0.538272106547299
TP73|TP73	232.187797907979	3.11340998670662	1.33321193034796	2.33527012160327	0.0195293139926276	0.156500509610755
LCMT1|LCMT1	286.684713193741	-0.473741461235979	0.188275666278109	-2.51621184299089	0.0118623857977069	0.119056231827426
TFCP2|TFCP2	531.158568538183	1.09279081598957	0.399723924648153	2.73386392108372	0.00625959080239249	0.0817001025829087
HLA-L|HLA-L	68.047929676216	0.181143121910973	0.72101271222914	0.251234297036091	0.801632969511449	0.9268236526818
ABHD16B|ABHD16B	47.3354645410254	0.789610811857703	0.60493670207985	1.30527840209219	0.191798065654501	0.504759762117101
SYCP2L|SYCP2L	4.56873239578483	3.40915623525569	2.57516281430551	1.32386046284809	0.185549391126841	0.496038084139905
COPG1|COPG1	2030.78181464734	0.282597438618021	0.286091824240677	0.987785789992671	0.323257568321558	0.642718138101399
SMAP1|SMAP1	1045.54693036828	-0.235912570782332	0.212695712946939	-1.10915526934567	0.267363205379813	0.58941433913277
GUCY1A3|GUCY1A3	208.216655214197	3.84037761494304	1.50956192788189	2.54403449372335	0.0109580262831058	0.113638937209362
KNTC1|KNTC1	1127.64164698579	0.185534363318237	0.388131809742257	0.478018958150953	0.632636711700611	0.850958290033289
CREB3|CREB3	368.223324510767	-0.270306646683768	0.337187534513711	-0.801650770019128	0.422755000599886	0.724849854877327
SNCAIP|SNCAIP	601.754924522907	19.5024384223991	2.87097538154766	6.79296609359495	1.09851205556191e-11	8.2219040948851e-09
OR2A1-AS1|OR2A1-AS1	120.282885607086	1.10872854044207	0.791917714363868	1.40005523343127	0.161496779183658	0.463841355017396
ZMIZ2|ZMIZ2	1239.4483813154	0.703686447528495	0.476454614151687	1.47692230619151	0.139696464836765	0.432265272011445
LINC01592|LINC01592	9.44164935960223	0.552866070956559	3.5525996132239	0.155622960971626	0.876330225211413	0.958896910960726
CCSER2|CCSER2	4526.72585800772	-0.413339214681083	0.253126884040235	-1.63293289153507	0.102483111542571	0.368800944404461
LUZP1|LUZP1	1215.92239777784	-0.292220044541562	0.538270718088005	-0.542886757019885	0.587207774501852	0.826312579255911
SNORA18|SNORA18	117.561625223672	-0.64284349982852	0.714396867172321	-0.899840871885372	0.368204940045716	0.681976525884129
TGFBR3|TGFBR3	1633.29584243972	-0.419787430679769	0.569669530655147	-0.736896407636535	0.461185348811896	0.75012921826569
BDH1|BDH1	278.133164183538	0.711547555244169	0.476543271007693	1.49314364200241	0.135399590774679	0.426641161628889
GTPBP3|GTPBP3	158.765554866619	-0.00775535157011683	0.445110579898047	-0.0174234267176781	0.986098820172871	0.998083776486112
AGA|AGA	463.021603506908	0.0736843326115463	0.368426202101439	0.199997535982142	0.841482508194632	0.943317970969778
DPY19L1|DPY19L1	385.646932705496	0.272795323016957	0.524814594037573	0.519793706417827	0.603207366342845	0.835171131868723
DOK1|DOK1	261.321132355608	-0.0743741066883097	0.4217909331646	-0.17632931587765	0.860035232107535	0.952112151127672
ZNF709|ZNF709	124.629181533239	-0.442218841237647	0.587497734335655	-0.75271582406647	0.451620698884402	0.742709620590937
OAZ1|OAZ1	8063.04167450525	0.193568491977477	0.417157226986266	0.464018071497655	0.64263479826452	0.85662443671682
COMMD7|COMMD7	375.560887830183	-0.579168349987497	0.383786513677438	-1.50908989593697	0.131275811312407	0.421029616893746
RPUSD2|RPUSD2	261.832476446982	0.0637937492062149	0.471988817679639	0.135159450429003	0.892485806706882	0.964153495671701
TMC6|TMC6	4716.0258866773	0.346924685633676	0.436835257720393	0.794177391825213	0.427092168134573	0.727161791700411
LINC01004|LINC01004	437.372646238615	-0.0198274545506604	0.589919213339424	-0.033610457334354	0.973187783233912	0.993268984677372
FLVCR1-AS1|FLVCR1-AS1	26.7281698710775	2.20506334750214	1.05989104891943	2.08046227935431	0.0374831519926747	0.221960586478995
MMP11|MMP11	7.69227455318936	4.62499035382467	1.52104899192969	3.04065837350653	0.00236061506397934	0.0446294799249781
COMTD1|COMTD1	97.07971423676	-0.673747895878404	0.559848625915745	-1.20344654731688	0.22880356443035	0.547307615518415
SLC25A30|SLC25A30	489.207140989393	-0.296321213808165	0.427189069184094	-0.693653548706481	0.487899503314805	0.76768850881017
UNC5C|UNC5C	6.69162534840781	2.97767542589309	2.55501403831924	1.16542429170052	0.243847289163651	0.565185607848828
SDHC|SDHC	422.819672049305	0.722150802534021	0.248557152761792	2.90537123760065	0.0036681774189366	0.0589035694840881
HAS1|HAS1	7.73270031720306	-0.469749355100132	2.44340634134084	-0.192251835952244	0.847544943906612	0.947128839587201
DNAJC7|DNAJC7	1159.99170669462	-0.121641175580368	0.200703819770373	-0.606073046938214	0.544466248027986	0.802203140272182
KIAA0895L|KIAA0895L	120.884595168375	0.427303366508165	0.688160654073452	0.620935480659661	0.534642075143308	0.795140998991612
DIS3L2|DIS3L2	615.910425275692	0.570157554848366	0.289380376762372	1.97027027619277	0.0488074031059723	0.254969395907332
COL4A2|COL4A2	224.530557370588	1.08864501305759	1.46802472873287	0.741571304454286	0.458347114950803	0.748078579965594
CNTNAP2|CNTNAP2	35.5520779399582	0.289421317433504	1.73383861008484	0.166925177320478	0.867428922446021	0.955390991569344
COX11|COX11	680.866378886765	0.185144544251838	0.260077241232487	0.711882913608476	0.476537283548312	0.759186683906008
LOXL2|LOXL2	75.3970030920419	0.712061702065062	0.56169637271474	1.26769859421308	0.204905607022428	0.520712789980186
TREX2|TREX2	9.0529635654163	1.32643091415145	1.17094170826978	1.13278987739828	0.25730250337203	0.579431254131024
C1QL3|C1QL3	79.1392408922744	1.48502690566562	0.735818760114171	2.01819658068408	0.0435707921272688	0.23994856877314
ACSF2|ACSF2	168.606714600274	0.18530928007725	0.39112199407697	0.473788953021093	0.635650412994209	0.852222031721228
PSMA4|PSMA4	1840.04722183538	0.150137828140888	0.360518362715963	0.416449877919741	0.677080836848942	0.873797606804674
FPR3|FPR3	76.545522968711	0.692498239488625	0.96760065222884	0.715685999067359	0.474185257918915	0.757560427025241
ORM1|ORM1	13.7152134756047	-0.656904636330962	1.12725271899005	-0.582748327206972	0.560062734873249	0.810231392503233
TBC1D19|TBC1D19	203.120423304751	0.425393094092532	0.402342772314359	1.05729025936164	0.290379137380755	0.612538764719997
CHIC1|CHIC1	684.249734659082	0.922542429820097	0.502589600619587	1.83557803162421	0.0664200886785947	0.299523458660253
FCGR1B|FCGR1B	126.920708603586	1.02002468224343	1.24413182027722	0.819868655088454	0.412290987354329	0.717934693605987
STON1|STON1	133.399268182534	0.903620726298985	0.835191351508461	1.08193257110114	0.279282490752435	0.601249770759845
ZNF252P-AS1|ZNF252P-AS1	6.92202458543862	0.629849875859286	0.951794198158665	0.6617500685314	0.508131410970874	0.779338733994678
TSPAN11|TSPAN11	6.89183289900431	3.65429184952998	2.31756406215452	1.57678137541223	0.114845838533885	0.392308868549907
LOC102724190|LOC102724190	6.23587257886837	0.150662076939339	1.46743555144367	0.102670319518371	0.918224630720144	0.974453019277779
PUS1|PUS1	186.541716769204	0.222633735503707	0.297805620137105	0.747580705163356	0.454713106514998	0.744924878075428
LINC01010|LINC01010	5.1838852712458	1.03402539401261	2.84941511889665	0.362890400614217	0.716686757864198	0.891639171757197
LRRC25|LRRC25	864.129463242074	0.164602655347654	0.814317580275153	0.202135701518363	0.839810638116261	0.94278000232693
HS3ST3A1|HS3ST3A1	91.8322012208209	1.99137946864831	0.813094886686025	2.44913539767133	0.0143199606689749	0.131691976448493
SLC2A3|SLC2A3	8464.01064545803	-0.811712946895364	0.761651151163447	-1.06572798538471	0.286546623096789	0.608978457551148
APC2|APC2	57.1931373241818	1.01789296808865	0.58190836242066	1.74923241153359	0.0802508536634926	0.327563809825651
RPL32P3|RPL32P3	162.911090223381	-0.0257424530234707	0.301697680404801	-0.0853253262966122	0.932002757477139	0.979571994359383
BBX|BBX	2953.77806110022	-0.46481832897	0.293272587805016	-1.58493615938983	0.112980839889762	0.388637698689908
RNF215|RNF215	58.1814173065079	0.301303413678691	0.438116935704311	0.687723731095489	0.491626772852137	0.770319624702346
ZBTB7B|ZBTB7B	1326.08115233835	0.03731007011084	0.556628591988193	0.0670286626448241	0.94655888501498	0.984294621265895
C11orf31|C11orf31	624.641434964672	-0.190295870232702	0.340902491849388	-0.558212024794396	0.576699610633159	0.820656476846653
GINM1|GINM1	366.445959016712	-0.621512043708759	0.304642841246984	-2.04013342694923	0.0413370381930801	0.233754857910654
SRP19|SRP19	725.788585957459	0.033268892335268	0.278872618018619	0.11929780905577	0.90503941922513	0.968764998746718
MIATNB|MIATNB	157.653507004466	-0.0316644229850726	0.342683140874824	-0.0924014613156563	0.926379078435248	0.977592900084942
RHOT1|RHOT1	1057.85525198686	-0.361714754425185	0.27676818583597	-1.30692316868948	0.191238806559487	0.504064984650851
ZNF783|ZNF783	541.616821757209	0.408921998444684	0.316766360757564	1.29092621282994	0.196729264929332	0.510345777617073
C5|C5	134.666080731732	-0.452052855430813	0.926467839858605	-0.487931513629015	0.625598351952209	0.846846551401244
EPHB4|EPHB4	82.0797700617344	-0.499078032645125	0.417744724998582	-1.1946961931041	0.232205750373794	0.550754816762042
SLC45A4|SLC45A4	393.985660195418	-0.314284450551943	0.347489816935216	-0.904442188619691	0.365760976019518	0.679833574589572
PLP2|PLP2	1780.68561875087	-0.813498633667435	0.706165362816252	-1.15199452777339	0.24932332201315	0.571633091186874
GTF2H3|GTF2H3	507.445297254049	0.363409390386558	0.314820044296897	1.15434006496689	0.24836077678892	0.570047752264108
RPL37A|RPL37A	15538.473380025	-1.15845537845896	0.410007603378224	-2.82544852562235	0.00472144733994799	0.068193357857523
SUCLG2-AS1|SUCLG2-AS1	24.4539353379699	-1.04134310049143	1.28250199488574	-0.811962168202478	0.416813339951392	0.720500243236483
WDR86|WDR86	46.1656946426446	-2.4831100571634	1.46912300679346	-1.69019887761686	0.0909899130453447	0.348917294588977
ZNF736|ZNF736	787.328934937471	-0.0931064379102501	0.955063851570958	-0.0974871342445867	0.922339550948618	0.976325695299777
BRPF3|BRPF3	488.664481051817	-0.406274577619248	0.336989567388324	-1.20559986698664	0.227971810517742	0.546312748977724
TMEM243|TMEM243	854.640024491951	-0.701564585432484	0.326267328935773	-2.15027532091817	0.031533443319263	0.202840596965508
C16orf91|C16orf91	111.936512436391	-0.000883685089978011	0.375965988935437	-0.00235043891198829	0.998124622807788	1
THSD1|THSD1	46.2180603516251	0.7683618251623	0.673862689309315	1.14023500240063	0.254188408578463	0.576525111100241
NAALADL1|NAALADL1	62.4129084536819	-0.462226710325176	1.06210161632966	-0.43520008181751	0.663417203203406	0.866199533806296
EBF4|EBF4	10.6834031802221	-0.519700278630387	1.94245889508352	-0.267547632511441	0.789047544877603	0.921941724855374
NCK2|NCK2	1795.88471979965	0.00389721202479444	0.567626474456935	0.00686580383433141	0.994521924161862	1
ALG13|ALG13	967.851749178354	-0.0947314906011142	0.364021122471209	-0.260236246616724	0.794681546412607	0.92409311098649
SLC8A1|SLC8A1	940.043329776857	0.166322888427044	0.743886550319849	0.223586363210263	0.823079175641034	0.936098806998753
NR2C2AP|NR2C2AP	206.683750648699	0.155907683942494	0.416749783992792	0.374103814640947	0.708327080755022	0.88780979131924
RPL13AP6|RPL13AP6	40.8255979152156	-0.0584153919315857	0.669617991013407	-0.0872368913552923	0.930483216059605	0.979030119138839
ZNF568|ZNF568	143.812460358567	0.260716706933864	0.625370407676876	0.416899654562124	0.676751806227982	0.873797606804674
ZWINT|ZWINT	297.266811384956	0.21051145352651	0.728899550118381	0.288807221094211	0.772728905847496	0.915881556085962
NOL10|NOL10	698.095727210053	-0.0593049481583934	0.252401664484849	-0.234962587427601	0.814237771279808	0.931992439241628
CLCN4|CLCN4	101.198892219478	1.71184359636944	1.27605057635347	1.34151704336149	0.179752639947576	0.488146853762349
USP7|USP7	4354.72700220726	-0.216734139788132	0.216268511502139	-1.00215301008344	0.316269698686257	0.636862487902855
GNB3|GNB3	5.96551555194659	1.71554273109228	1.95802027436826	0.876161883280695	0.380942034788669	0.692295155841898
BTF3|BTF3	6918.94171048715	-0.988148440361602	0.321258799917747	-3.07586419613906	0.00209893420113102	0.0415214422731272
YES1|YES1	394.319198373836	-1.65276110194609	0.811370367892968	-2.03699958409636	0.0416500836841869	0.234592619154219
ZNF684|ZNF684	98.2266312008683	0.0721944044672328	0.439344088373208	0.164323149844925	0.869476758455836	0.956110736623248
NARS2|NARS2	326.566928593318	0.712528877347346	0.469466602349549	1.51774135536232	0.129079614220234	0.417656536914045
ATAD3A|ATAD3A	288.326378868846	0.610347991889015	0.443709331187133	1.37555816159206	0.16895846731206	0.474597743638508
EDEM1|EDEM1	6352.94867332855	-0.118646401297079	0.410854768883318	-0.288779418624137	0.772750182976175	0.915881556085962
PMCH|PMCH	10.7385857486131	-0.581858026701246	1.44516416252642	-0.402624173633014	0.68722472346265	0.877786875781735
SAMD15|SAMD15	6.27657897385356	-0.158832281828912	1.43339098209926	-0.110808763144509	0.911767996165884	0.972005830684068
PLEKHG2|PLEKHG2	1108.64085047036	0.574650925453006	0.725611449700176	0.79195404881008	0.428387470142144	0.727971929961274
SNUPN|SNUPN	252.199286319201	0.21684499819241	0.356676054463648	0.607960628359231	0.54321358692458	0.801325702581562
SUCLG2|SUCLG2	1306.35470672753	-0.339795659249805	0.422811675300376	-0.803657228737606	0.421594962089775	0.724091468088193
CDC16|CDC16	696.156633053856	1.13218274297307	0.481027455537664	2.35367592834714	0.0185888092305445	0.152152920408584
HYDIN2|HYDIN2	9.65785946526	3.39683701173433	2.500687845681	1.3583610675763	0.174349141579866	0.482491253858239
WIPF2|WIPF2	795.020018556397	-0.203101712528185	0.266813597734616	-0.761212000634983	0.446530451519599	0.739058353000993
CTAGE8|CTAGE8	127.979888114861	1.50819720886557	0.775473720861053	1.94487210629257	0.051790372959429	0.263379579137138
SDR16C5|SDR16C5	9.3889289930046	2.06092108135475	2.15095565998621	0.958142057362524	0.337991130309951	0.655489321171933
SVIP|SVIP	623.474019970691	-0.39794344404579	0.353108951694082	-1.12697070447127	0.259754867340945	0.58230513334412
RAB27B|RAB27B	451.233754464735	3.55149664845872	1.02420715831538	3.46755694844024	0.000525212441616349	0.016728408215064
SLIT3|SLIT3	8.96335505231292	3.56466012403539	2.25826796172226	1.57849297977766	0.11445239965377	0.391606797439202
MAST2|MAST2	231.792723113283	0.879755172029292	0.428454484460506	2.05332235730254	0.0400413239307917	0.229622264745205
XKRX|XKRX	12.9619763427678	-1.67479603686636	1.39594809188184	-1.19975523918558	0.230234412677691	0.548961158272841
TPGS2|TPGS2	692.441650437822	0.0552150395625109	0.239942856355277	0.230117455469295	0.818000501334355	0.933433336696651
ABI3|ABI3	211.344120753681	0.874335588322361	0.782311794802023	1.11763058429104	0.263724800833469	0.586217357781774
CD180|CD180	199.709483308987	3.25763047763551	0.872708329597761	3.73278261150203	0.000189376029022657	0.00857566994025146
NDUFS4|NDUFS4	436.183043562578	-0.671532177476993	0.372565036614217	-1.80245624651126	0.0714736526228379	0.311116317587223
ADI1|ADI1	806.666945940845	0.251866842807604	0.330988950575049	0.760952419620108	0.44668548706733	0.739084536365128
C17orf80|C17orf80	379.828256881958	0.850568212217789	0.50312570825464	1.69056797985625	0.0909193445172795	0.348744307052509
OSGEP|OSGEP	367.938256343922	0.822398198601168	0.287251518235405	2.86298991090869	0.00419663925974663	0.0636844670599061
IRAK3|IRAK3	1790.09131363437	0.181176968841189	0.639592837571199	0.283269227230864	0.776970464709583	0.91738292921516
TBCB|TBCB	984.049295778944	0.512697803466207	0.394059875260458	1.30106574065003	0.19323595320739	0.506247261851079
SOX6|SOX6	14.8276642612743	1.79800669678453	1.4621321888321	1.22971555548662	0.218803639660172	0.537059694480636
ATE1|ATE1	1243.08280582153	0.594788022077597	0.333876616747058	1.78146055232195	0.0748372437261428	0.317737235735566
PRKAG2|PRKAG2	495.276663451979	-0.183058036450577	0.355681086965892	-0.514669019969934	0.606784325516191	0.837009918558213
BYSL|BYSL	124.312887820829	0.830238462210793	0.532824146023887	1.5581847564648	0.119189457431448	0.400394021501315
TBX21|TBX21	211.858850790882	-0.00135956484779099	1.16957827158469	-0.00116244024091598	0.999072507087799	1
THNSL1|THNSL1	79.454142292992	0.637642693321124	0.97804578223517	0.651955874564371	0.514429638313223	0.784137748686013
CTAGE15|CTAGE15	52.8279599563271	0.878179103849448	0.645926607430065	1.35956483871046	0.173967671254211	0.481970110736929
FKTN|FKTN	342.159019069459	0.891777207954153	0.488339673423685	1.8261412219532	0.067828992334097	0.302422484152164
IFT27|IFT27	101.870741116775	1.27123911345287	0.596094703640261	2.13261266320537	0.0329565136588144	0.207767208708744
PGBD3|PGBD3	38.1426597058856	-3.71930051027989	1.43076359824117	-2.59952134290529	0.00933538731075698	0.103288225644357
KLF13|KLF13	7051.67141498587	-0.412867499706937	0.201856146549652	-2.04535510443514	0.0408198617126266	0.232292226385987
C8orf82|C8orf82	93.3667505170914	0.215331385656556	0.633219778378218	0.340057896182673	0.733812928228484	0.898877399061252
MINPP1|MINPP1	258.497326955804	0.673206381855535	0.52525459286286	1.28167633563426	0.199956209616012	0.514491697146129
A2MP1|A2MP1	65.1715296363692	3.72429492191295	1.40937213780793	2.64252061042269	0.00822914566868931	0.0965553091792878
TXNIP|TXNIP	48703.1413283794	-1.4230926161254	0.582033678470012	-2.44503483005705	0.0144838153675031	0.132251081554933
FKBP9|FKBP9	43.6280572025823	1.58400420801751	0.835377532118758	1.89615371148422	0.0579397219519381	0.279862763991449
RPS14|RPS14	20210.684846786	-1.55995318274006	0.369675186997789	-4.21979412632147	2.44525513589434e-05	0.00199738735310948
C2orf16|C2orf16	19.6648137317864	1.386484483146	1.070870700704	1.29472632151997	0.195414656509419	0.509082359625413
PCDHGA6|PCDHGA6	46.888987649841	2.86809228335976	1.41842513278258	2.02202584900149	0.0431736815025413	0.239072685894059
CLECL1|CLECL1	39.5722969457548	-0.521649881859971	0.831581469248864	-0.627298588472825	0.530463528517493	0.792585919433308
APOOL|APOOL	300.366889466377	-0.331192936081134	0.740146733904888	-0.447469293465388	0.654536253944294	0.861819086470379
HEXA|HEXA	1086.98534387154	-0.286817997378361	0.280814663718602	-1.0213782769755	0.30707525319416	0.629112924715499
ZNF671|ZNF671	278.35190966747	-0.627825873683546	0.350663338798389	-1.79039495783877	0.0733904403296546	0.314525557577072
RNF216|RNF216	2183.55156416444	-0.0454942186381235	0.279706438985125	-0.16264987964951	0.87079411159522	0.95642479058033
UBE3D|UBE3D	86.7249564807774	-0.20434275052765	0.346084045238657	-0.590442562547884	0.554893982634628	0.809048601207478
ZNF280B|ZNF280B	67.0455296594818	-0.281070544920502	0.572158081341255	-0.491246307771474	0.623252250083862	0.845665427867723
KISS1R|KISS1R	4.33667996331382	-2.4528831862067	2.32933846262222	-1.05303854530672	0.292323326497226	0.614069623472456
UBXN2A|UBXN2A	379.615747913361	0.0696473419730781	0.405476095838121	0.171766825931173	0.863620846923696	0.953808273407856
MMS22L|MMS22L	554.47436992016	1.04625845732585	0.421714300637202	2.48096508879347	0.0131027205367092	0.125176074427924
CEP78|CEP78	622.47069915003	1.65667808155224	0.443599212365337	3.73462809529933	0.000187992787888171	0.00857566994025146
PHF11|PHF11	786.206744572944	0.30650352310681	0.339812197820926	0.901979166940707	0.367067934618182	0.681118892134923
LONP2|LONP2	2070.5077840832	0.116619744137564	0.189194337799131	0.616401872773699	0.537629317634984	0.796885095659989
FAM132A|FAM132A	9.61036622158444	-0.162397974707559	1.35764780245931	-0.11961716021886	0.904786425440965	0.968674971369601
FBXO10|FBXO10	201.310871754861	-0.684251323601451	0.493515949958666	-1.38648269353556	0.165599561246151	0.469698572785229
ASB7|ASB7	894.053893293012	0.0245438194477594	0.323941216083375	0.0757662755746475	0.939605047167718	0.981853349816915
ZNF419|ZNF419	165.296093871095	-0.0646284111045917	0.535196604619792	-0.12075639222432	0.903883991223412	0.968135234215828
ZNF79|ZNF79	240.466474485632	0.612592426095841	0.322736888362185	1.89811716040458	0.0576806500873177	0.279592293665726
KIRREL|KIRREL	15.2975569359059	3.3072769935952	3.95631646797673	0.835948544653847	0.403183850923176	0.711069700719056
POTEJ|POTEJ	7.98373235801656	3.05968232932226	1.86325570426949	1.64211617456008	0.100565930258082	0.365834553881521
UBR7|UBR7	850.984727134041	0.426276050464634	0.298275494527195	1.42913534060294	0.152965337645555	0.450945302069576
VPS11|VPS11	1024.61699238315	-0.118461917334888	0.224609981839133	-0.527411633111353	0.597907766800951	0.8321807033187
CPEB4|CPEB4	1763.12071171698	0.275110478084938	0.552227682671211	0.498183062381419	0.618355019526385	0.842637044488701
CXCL2|CXCL2	284.105907088651	2.94318910164076	1.69543333388345	1.73595094706513	0.0825725083303736	0.33238788751633
FAM173A|FAM173A	71.5065752019398	0.336210125923778	0.732832767039525	0.458781513389458	0.646391071468558	0.858168471273911
RGS19|RGS19	782.055983628424	0.456249229293939	0.500032172284944	0.91243974804474	0.361537273538866	0.676401570833482
SEC1P|SEC1P	8.83608791985644	0.331376920680586	1.22270471708134	0.271019581466572	0.786375971855365	0.921211858827506
HSPA8|HSPA8	27639.7981801265	-0.575129128452803	0.396328491658127	-1.45114252585431	0.146740177000109	0.441926172548392
PSMG3|PSMG3	299.589705621302	-0.594738121710193	0.331391493053237	-1.79466924823761	0.0727064128847854	0.313233282670193
OARD1|OARD1	271.827336990596	-0.318679397696041	0.23029556252987	-1.38378436038995	0.166424493272098	0.471021045945168
ACP2|ACP2	311.502335600915	0.00742389142043815	0.329627481712764	0.0225220645495429	0.98203151149753	0.996152226041939
MCL1|MCL1	20621.6584436282	-0.667827556690517	0.250972938038018	-2.66095445154869	0.00779194970489633	0.0933502914820983
RASA1|RASA1	2242.23924998497	1.09404606382558	0.521778462023864	2.09676355666736	0.0360145111425872	0.217104425927348
IGSF22|IGSF22	6.27472864900917	-1.48119814450919	1.73345223034558	-0.854478778578107	0.392839762823542	0.702420362292536
UBALD2|UBALD2	990.257046760426	-0.818219236758409	0.517280791464391	-1.58176999853808	0.113702086296358	0.39001490339259
SYNGR2|SYNGR2	1583.70583384202	0.230990850046028	0.380567704616118	0.606963878553568	0.54387488403018	0.80180953043479
REPIN1|REPIN1	698.294821785114	-0.0635033081219743	0.520763314541766	-0.121942745098803	0.902944362521503	0.967857484583857
GP9|GP9	49.4708242688137	7.86775279293409	1.92739079838012	4.08207448097528	4.4635486329114e-05	0.00306030932775355
FBL|FBL	1098.05473365054	-1.05876482254688	0.320741900643988	-3.30098693192591	0.000963453699628962	0.0251499718043817
HAS2|HAS2	6.88771037402709	1.77933176030451	3.40870622394827	0.52199621891837	0.601672963199953	0.834352807322533
TCEAL3|TCEAL3	50.724419958604	-2.11831763301955	1.30456327516274	-1.6237753072999	0.104423771880876	0.37153194188091
TRMT6|TRMT6	516.939595878591	0.778221576566567	0.445392574799683	1.7472711055333	0.0805903226961731	0.328184558018551
MSH2|MSH2	796.212664297736	0.421571711558812	0.53386906038614	0.789653761268532	0.429730002016738	0.72840684639597
LOC100505736|LOC100505736	41.3908367048903	2.10272911592503	0.971335748367388	2.16478094156349	0.0304044650053423	0.197921359417884
DLEU7|DLEU7	124.073368450016	0.902328035730261	0.853294313949226	1.05746402030279	0.290299866893573	0.612532360351882
BOD1|BOD1	262.115979275949	-0.155557373570518	0.296140867859698	-0.525281683324491	0.599387388599483	0.833488759319897
CD200|CD200	39.8993364664594	-0.805905102294628	0.972841198153251	-0.828403550162638	0.407441996662964	0.713856799202398
MIR3620|MIR3620	6.21585543017951	0.177279084780155	1.00286837928723	0.176772035534866	0.859687455510645	0.951989186160055
STT3B|STT3B	5515.33437133934	-0.234305825306016	0.369463890986729	-0.634177875083418	0.525964744878922	0.789386384577842
EXO1|EXO1	171.417986911475	0.341371018255308	0.920175013554976	0.370984881383016	0.710648792399668	0.888675372388451
TOMM70A|TOMM70A	1907.59961096888	-0.276223556620291	0.286313218861416	-0.964760054456274	0.334665007802802	0.652885500309615
TEX21P|TEX21P	9.9669321968888	2.47805631825269	1.24199467669164	1.99522297861502	0.0460185659304283	0.247223001361866
SDF4|SDF4	1446.02783158598	0.523286601562337	0.370093827646477	1.41392955643182	0.157382586729159	0.457723257349268
SLC43A2|SLC43A2	1024.4921794152	0.0330050646467326	0.753138154750067	0.0438233867698357	0.965045185043127	0.990515926114126
RASGRP4|RASGRP4	411.06710689574	-0.0521755208606548	0.890806131418295	-0.0585711290262267	0.95329370689039	0.987084163748903
C3orf35|C3orf35	86.7510348274902	0.733969143923124	0.591306589919455	1.24126663973608	0.214507264183382	0.532597480659553
DOCK11|DOCK11	7343.0413252559	0.57409370612878	0.346786302063248	1.65546823133768	0.0978295554348747	0.361133269012761
GABPB1-AS1|GABPB1-AS1	413.820193179103	-0.0859178542996544	0.457811465974747	-0.187670822347629	0.851134704222557	0.948412979185417
NFKBIA|NFKBIA	8705.97782917409	-0.361980526766982	0.70115617869783	-0.516262336073602	0.605671198060421	0.836571091689927
LARS2-AS1|LARS2-AS1	10.8916013821915	2.18325071197853	1.07074276597755	2.03900580172055	0.0414494485235896	0.234162747052158
ECE1|ECE1	2674.92696841676	0.171471552347867	0.369193177115481	0.464449407455413	0.642325798835316	0.856563606368687
KCNK1|KCNK1	109.89179839404	1.96376130141701	0.98267163147011	1.99839014226875	0.0456743795219005	0.246367458830295
C8orf31|C8orf31	11.6115308091002	2.42137021196081	1.71342069678834	1.41317903799076	0.157603088343838	0.458057325200102
MEX3A|MEX3A	6.17310503637236	2.3105441852114	1.95407887823504	1.18242114530112	0.237038637081021	0.556655343102721
MTCP1|MTCP1	76.8957593286126	-0.178538910764474	0.482863488523771	-0.369750281410405	0.71156856347476	0.889174243569104
SNORD57|SNORD57	7.31111743635181	0.806876362120673	0.919101394710541	0.877897005449315	0.379999614445375	0.691984364566554
CCDC90B|CCDC90B	643.868498156975	-0.082078170153136	0.293542230167398	-0.279612817911513	0.779774571954065	0.918597260033107
RPL13AP20|RPL13AP20	69.5386154546449	-1.34975819248807	0.604979972654329	-2.23107913236541	0.0256758877549009	0.179695781047508
PHPT1|PHPT1	319.344120123948	0.310343908670981	0.461486238439787	0.672487894157377	0.501273144378241	0.775303550954553
LATS2|LATS2	366.600658296323	-1.20116978228128	0.617151892803298	-1.94631142882053	0.0516173415665153	0.2632250489692
LINC00907|LINC00907	4.88272908109906	3.59186746404184	2.36363640457334	1.51963620846761	0.128602432381198	0.417157652595821
TMEM75|TMEM75	36.8921567496685	1.29913723721561	0.882076444387135	1.47281706192511	0.140800370424541	0.433263144175876
PTGDS|PTGDS	154.975188559966	1.35350391195404	1.04773175338469	1.29184202691343	0.19641185770252	0.510345777617073
PLGRKT|PLGRKT	340.755428738895	0.0534546750778382	0.325571093964948	0.164187411194414	0.869583611032636	0.956110736623248
TSR1|TSR1	716.329978625082	0.0137180567032488	0.24810975874978	0.0552902746444711	0.955907210025158	0.987938996319699
ZNF160|ZNF160	838.429658589072	-0.0597859186522071	0.34341606525826	-0.174091793309804	0.861793322706598	0.952884430391647
CHERP|CHERP	447.425312128222	0.190079606207393	0.359043697155287	0.529405216449692	0.596524380287484	0.831795442770981
ASB13|ASB13	137.753782725609	0.169758015397339	0.616867875678038	0.275193476740456	0.783167598372017	0.919979111040716
TRAPPC6B|TRAPPC6B	479.496376817247	0.66412254482836	0.446435510164628	1.48761137881585	0.136853410855941	0.428334509300171
FAM127B|FAM127B	38.2764626927023	-0.434382891889251	0.720707745240389	-0.602717113501207	0.546696894848365	0.803665709478064
MKNK2|MKNK2	3590.88931525366	-0.387915803478174	0.447566783512029	-0.866721610648187	0.386094561691586	0.697069318999939
HSPB8|HSPB8	6.64630748401637	0	5.38834333162314	0	1	1
TMEM259|TMEM259	2464.52381009209	0.86051946989237	0.565280909458813	1.52228645173284	0.127937321303494	0.416014166920493
RPE|RPE	556.13245706498	0.61457024986572	0.550934014873551	1.11550609197142	0.264633609342905	0.586749096776399
ALOX12P2|ALOX12P2	81.4714514344832	3.67747576090032	1.39723975973194	2.63195756868945	0.00848944646817353	0.0982347015037544
ELOVL1|ELOVL1	614.810765857013	-0.0240457594003292	0.353052111117158	-0.0681082442029351	0.94569946767334	0.984256337691768
DNAL1|DNAL1	150.423483344118	0.566761365392249	0.339789263330768	1.66797902863851	0.0953198899324631	0.356142100947469
FRA10AC1|FRA10AC1	211.686937630517	0.151390859120154	0.384348664017112	0.3938893855851	0.693662707284146	0.880407203092395
ZNF22|ZNF22	625.682387392735	-0.506493438231522	0.399060096765027	-1.26921594601265	0.204364055266884	0.519723395131273
PNPLA3|PNPLA3	5.0731451251528	1.55617515896818	3.58870114030781	0.433631862371997	0.664555793380646	0.866698509800561
SYT10|SYT10	16.8133096448217	2.36512464797782	2.4601126289699	0.961388767378566	0.336356729973802	0.653720639129411
SEPT4|SEPT4	18.1584903363944	5.51840368185795	1.37816624597785	4.00416400993951	6.22371766648329e-05	0.00397944973791022
SRD5A1|SRD5A1	184.060025738092	-0.0100855767169199	0.474552154421982	-0.0212528309542802	0.983043970775694	0.996705467934591
ST20|ST20	50.9992774770585	0.933458005066685	0.67834602245233	1.37607942579524	0.168797044513324	0.474510644480729
SNORD99|SNORD99	6.25968176916232	-0.54200169436124	0.766776200299457	-0.706857743041016	0.479654886402115	0.761844095045208
DAPK1|DAPK1	697.025334011659	0.755158790471806	0.83266664377205	0.906916106367458	0.36445116316328	0.678907605894167
RUVBL1-AS1|RUVBL1-AS1	7.88852060704474	2.1678562854507	1.18230665357949	1.83358207355716	0.066716055247044	0.300003630535679
MTIF3|MTIF3	463.083398269067	0.325200089790094	0.438260165481205	0.742025206495845	0.458072063623538	0.747848423298198
TOR4A|TOR4A	139.912542451289	1.24660578550033	0.765898341916399	1.62763870513301	0.103601517036247	0.370250177693699
SRRM1|SRRM1	2342.57709068328	-0.753442513823457	0.29073207900486	-2.59153553471773	0.00955486733474431	0.104564548165869
RGS6|RGS6	130.881512946325	6.73640953706657	1.60709921277239	4.19165754268876	2.76923787726078e-05	0.00216357461489971
PPFIA4|PPFIA4	12.9865811258247	2.01605298111867	1.52014409956937	1.32622491623641	0.184765208521968	0.494716380157942
PAAF1|PAAF1	116.25123176986	0.126047592659032	0.388937773738073	0.324081642797487	0.745876224486794	0.904401949083905
SPIRE2|SPIRE2	17.7940128968733	-0.385682701814946	0.762966695725412	-0.505503980679323	0.613204903276584	0.840246737999666
FGF11|FGF11	46.3971544159067	1.14942556949449	0.736949158756102	1.55970809632867	0.118828877993388	0.39955552144845
MIR631|MIR631	4.19890153331404	0.707449278033745	1.04945086027719	0.674113772079705	0.50023898436997	0.774752774644751
LINC01176|LINC01176	21.3074966635275	1.33838581565453	0.913076450999486	1.46579819706169	0.142703272398531	0.436053385786241
CHM|CHM	546.427427335307	1.15236532951175	0.474092753399481	2.4306748442129	0.0150707326366836	0.13513001448186
BIVM|BIVM	499.25309259091	3.04091155787456	0.696113822771391	4.36841139825091	1.25153571690408e-05	0.00118842669944429
AR|AR	47.4665883467319	5.4076185462209	1.90397170503499	2.84017799840231	0.00450883672851088	0.0665909383938633
F2R|F2R	349.219327295609	0.367466383380703	0.812888109775304	0.452050385485742	0.651232684957202	0.860980747896643
DEGS1|DEGS1	1379.21600169377	-0.279206207683272	0.452349910172766	-0.61723502404728	0.537079717296433	0.796694124200945
MYCNOS|MYCNOS	27.9568943081297	2.88890441199772	1.85470526114204	1.55760835563644	0.119326116753523	0.400587656553346
GTF2H2|GTF2H2	31.7705761632791	-4.30188580056044	2.31465625732758	-1.85854197008382	0.0630920890745885	0.291623533378645
AGTPBP1|AGTPBP1	3652.97133928409	-0.725187908991674	0.363191465753714	-1.99670966245511	0.0458567318761843	0.246840036030647
ZNF563|ZNF563	60.0725923898833	-1.17220793235698	1.00903379171058	-1.16171325676792	0.245351959004874	0.566492919141359
SNORD45A|SNORD45A	29.8375741231534	-0.600570837302227	0.585440441547872	-1.02584446628653	0.304964902564427	0.626819265179375
GPALPP1|GPALPP1	401.741208324414	-0.201972009768328	0.391419397785846	-0.515998979383315	0.605855122049139	0.836622069370128
CDK4|CDK4	531.716473960374	0.527715044362132	0.345946076635177	1.52542572384378	0.127152946679977	0.41455721169749
HSD11B1L|HSD11B1L	25.3280383169316	-0.584173742908655	0.827771941483066	-0.705718222173644	0.480363386660848	0.762199833715149
MLXIP|MLXIP	956.394897560632	-0.387496635980101	0.3858231437683	-1.00433745937441	0.315215983803107	0.636276805336
PKM|PKM	10601.0936069906	0.74306772453194	0.400884179556738	1.85357208496867	0.0638004043664328	0.29311100735838
RBM26-AS1|RBM26-AS1	25.2778734542602	1.01329958497608	0.727021375499765	1.39376862788872	0.163387484624672	0.466368690438454
PIGC|PIGC	510.090581829582	-0.75880071449299	0.347325439345355	-2.18469662321076	0.028911097951169	0.191752239402625
KLHDC7B|KLHDC7B	166.267987661571	1.88586362748311	0.620600248517746	3.03877356154359	0.00237543327095751	0.0448103832063941
ACY3|ACY3	7.62021626763867	-0.952837273748752	1.66004080077748	-0.573984249846442	0.565978459428355	0.813772708772412
USH2A|USH2A	8.66742850935969	3.86222943653171	2.5665171017056	1.5048524063857	0.132362026751062	0.422402024801576
TAS2R19|TAS2R19	57.1075451304317	1.42024517247279	0.864807735417094	1.64226696213328	0.100534690733029	0.365834553881521
C12orf45|C12orf45	135.779372354276	-0.936810710599833	0.370582859172123	-2.52793859028627	0.0114734418383057	0.116384194333663
ZNF630|ZNF630	40.3027542841855	-0.369452575241372	0.755875558040117	-0.488774337669169	0.625001468100929	0.846846551401244
MIR1291|MIR1291	54.4364255573512	-6.62836985083812	1.48293398057952	-4.46976732453578	7.83047343747418e-06	0.000842871825491015
LOC101929567|LOC101929567	6.52262914652526	3.11192167254997	1.80709550445229	1.72205711589834	0.0850591724942845	0.336999348531544
ALG1|ALG1	290.838737801591	0.975464110234966	0.325535478755318	2.99649093230834	0.00273106360252083	0.0491070041822808
ITIH5|ITIH5	8.97945409599925	2.56165738754713	2.69064284650914	0.952061471432616	0.341065807396778	0.658599192837664
GTF3C6|GTF3C6	483.734452597622	0.587433703620238	0.335450925002163	1.75117628194482	0.0799155496355237	0.326782817575488
LOC101927391|LOC101927391	7.06940987802819	3.9903830843708	1.43764621498576	2.77563634416853	0.00550937934665281	0.0753654841394686
PDCD1LG2|PDCD1LG2	54.0925815328951	1.33808162852078	1.19998508011253	1.11508188784756	0.264815332255885	0.58690475818155
EIF4G2|EIF4G2	16783.8405010346	-0.247026272186042	0.264271820562534	-0.934743143102495	0.349920687204717	0.665642661776499
TJAP1|TJAP1	449.0255699243	0.712299539236927	0.414015350553107	1.72046649547009	0.0853476788679002	0.337593969794438
BOLA2|BOLA2	264.529480680158	0.346354865806462	0.349046184836562	0.992289504521127	0.321056321655733	0.640387139070764
ANO9|ANO9	990.537239160557	0.581544906971503	0.635248448463519	0.91546057039272	0.359949892944289	0.675504514932934
COQ3|COQ3	49.993882427852	0.0442396013861215	0.496186096236512	0.0891592926961706	0.928955316209009	0.978475145503468
AKIRIN1|AKIRIN1	2273.84963618108	-0.809789498257626	0.292648727388917	-2.7671041165385	0.00565566894289528	0.076361258776977
NHS|NHS	30.3192122776443	0.422487342811688	0.843209917182404	0.501046458541942	0.616338426784813	0.84211349431158
DPM1|DPM1	648.943732729896	-0.673308734948962	0.348012280465264	-1.93472694138495	0.0530238124830729	0.26671743441147
DNAJB11|DNAJB11	984.58955900869	0.234981115793488	0.393502869832308	0.597152228886225	0.550405750083513	0.806085549077432
UTY|UTY	1518.98568639214	-0.286529318768421	2.81306930007182	-0.101856473554031	0.918870599280236	0.97460750061396
SIK3|SIK3	1246.34303124004	-0.651319416813231	0.290408323987598	-2.24277117084649	0.0249115744398073	0.177460514604265
LHFPL2|LHFPL2	485.003925422879	3.50397174168756	0.808684540341206	4.33292781905926	1.47139361885116e-05	0.00133615063090569
PRICKLE1|PRICKLE1	23.377205452511	2.79607392405246	0.929313662845785	3.00875155056927	0.00262323539062325	0.0480513675844637
LOC102724009|LOC102724009	13.9051012732524	-0.721879301383561	0.700981499989249	-1.02981220102761	0.303098172110383	0.625240695295851
RAB27A|RAB27A	2063.69842608994	1.2567304309157	0.547517935148906	2.29532285654517	0.0217146286800013	0.166204317743524
CRELD1|CRELD1	282.138422976792	0.408507799491288	0.459263788956179	0.889484016189802	0.373743009673767	0.686583949508986
RHNO1|RHNO1	702.347617203923	-0.160953835338726	0.401459624331427	-0.400921601037144	0.688477845689409	0.878517926677448
TNFSF14|TNFSF14	153.777164208839	0.386195785433069	0.72763455825596	0.530755144943537	0.595588466844942	0.831518731706505
PDE4DIP|PDE4DIP	2491.0836588396	0.769263460764165	0.474165778557366	1.6223512863046	0.104728153240752	0.372095532180252
LARS|LARS	2054.28135861234	1.29809319891958	0.455804305495405	2.84791780873747	0.00440062880829816	0.0657283770912214
SEPHS2|SEPHS2	522.310824810553	-0.328497168179078	0.275192273255736	-1.19370055086469	0.232595124943639	0.551242831991446
EFCAB5|EFCAB5	24.1358229913412	0.430923150348473	0.693166533852432	0.621673334333552	0.534156689079995	0.794944165240867
NGLY1|NGLY1	901.635833230239	0.0950029560586563	0.347253847019042	0.273583595615131	0.78440464199035	0.920368113268677
MDP1|MDP1	99.3907684063759	0.351804061925089	0.360228387215611	0.976613932745173	0.328760318778464	0.646855171847742
MRPL27|MRPL27	232.253720911342	0.290102129973578	0.401972388322971	0.721696659772788	0.470480996162328	0.754679279008105
SLC46A1|SLC46A1	93.667689906585	0.793457895838634	0.702141792795589	1.13005365010316	0.25845361856212	0.580779272352427
HLA-DQB1|HLA-DQB1	1853.3588430713	-0.83583422127995	1.28092960669456	-0.652521588158792	0.514064750884499	0.783931525422078
CTBP2|CTBP2	277.139282468954	1.35907698349304	0.642479188080096	2.11536343699216	0.0343989835464539	0.212228731969398
EID2B|EID2B	62.0268678251432	-0.447465781855674	0.36313542742557	-1.23222838660486	0.217863782300977	0.535777944604188
FBN2|FBN2	204.010511530981	0.639521755618088	1.17156044590543	0.545871754080805	0.585154095619847	0.825940530832743
MTA1|MTA1	837.543206068521	0.0173202277257369	0.51663391731875	0.0335251464240409	0.973255813153334	0.993268984677372
IKBIP|IKBIP	228.634170748954	0.893827149183907	0.464799201823274	1.92303933758423	0.0544751097523326	0.270820930020915
ANKRD13D|ANKRD13D	1427.54672111495	0.203467413216619	0.489435663059537	0.415718405039618	0.677616071776778	0.874105692280537
MESTIT1|MESTIT1	6.67129197835845	1.37844841173017	1.76847262463859	0.779457025528952	0.435710543079624	0.732725835778286
SPC24|SPC24	49.9394631644925	3.53887734293925	1.40301377309314	2.52233970243734	0.0116577068631962	0.117768276215376
CYP4F12|CYP4F12	48.992039661724	6.49745705219102	2.89800654145097	2.24204361144675	0.0249585538266229	0.177612518102587
SNORD88B|SNORD88B	4.60124524843824	0.0849712245149554	0.9362235115308	0.0907595499028011	0.927683651847644	0.978001438841869
DOT1L|DOT1L	779.462691908135	0.686938797653818	0.435703706594369	1.57661912730374	0.11488318892956	0.392308868549907
ZNRD1|ZNRD1	300.058096731629	-0.0831802444770577	0.373507638775769	-0.222700249852169	0.823768806891233	0.936544867973996
RELT|RELT	802.73356334628	-0.465768665976371	0.634976832003363	-0.733520724696148	0.463240892266699	0.751411469519212
PDC|PDC	8.08296503518739	3.56772569563914	1.74579596968977	2.0436097674536	0.0409921135822814	0.232806840677548
SF3A1|SF3A1	2766.11686441926	-0.555563184248034	0.260571885590336	-2.13209181408571	0.0329992994495303	0.207883409668776
STAM2|STAM2	741.732594001456	0.902447607992087	0.352724238763211	2.55850749343572	0.0105122554511829	0.110986533743102
SUV39H1|SUV39H1	277.461141885155	-0.329069934002678	0.420762888429859	-0.782079273271112	0.434167986817494	0.73168788831631
EMG1|EMG1	415.429254057813	-0.161782358071841	0.336284110183124	-0.481088321371301	0.630453727983945	0.850166354197623
SNHG7|SNHG7	683.49218960705	-0.849435601730202	0.383721379104207	-2.21367806952326	0.0268509325923722	0.183652760772389
ZNF516|ZNF516	528.341626228879	-0.587793793280544	0.707625772304591	-0.830656282297663	0.406167829955397	0.712871100339111
LOC100506127|LOC100506127	87.0650847463594	1.20466981656933	0.588004460599166	2.0487426495741	0.0404872863760298	0.231402394714289
UNC13A|UNC13A	4.36559102657403	4.32479261303879	2.45117597398644	1.76437459363851	0.077668932724472	0.322623155485169
RXFP1|RXFP1	196.609287974828	17.3842890948354	3.42279158578661	5.07897973310001	3.79467184029791e-07	7.2789480514119e-05
MTMR14|MTMR14	1593.42637179552	-0.225579275356549	0.301187584019801	-0.748966050810775	0.453877667761223	0.744127489102046
ZNF788|ZNF788	14.1334976679339	0.107726019701402	1.48171530565197	0.0727035883954793	0.942041992982109	0.982598676831725
TMEM110-MUSTN1|TMEM110-MUSTN1	223.357508662989	1.04407750984138	1.01526563134121	1.02837866033357	0.303771742580115	0.625848322641022
CSNK1E|CSNK1E	921.58782375528	0.25251195814805	1.79669153013165	0.140542744212495	0.888231182608804	0.962217488699874
BCAS1|BCAS1	2840.39760306912	5.87256577173892	1.22243535815279	4.80398880200331	1.55535531629569e-06	0.000239891604778133
NOP58|NOP58	2350.02895484914	0.704158190711877	0.519626264202056	1.35512432535178	0.175377949712933	0.483507123633288
CD79B|CD79B	207.156101789309	2.00382477274146	0.786245749907167	2.54859854311207	0.0108156725507152	0.11268655315116
RIC8B|RIC8B	379.486221947781	0.759373040905622	0.429705852583492	1.76719268853355	0.0771959637557322	0.321986194292172
CEP162|CEP162	427.28609953242	1.02133179650693	0.554918088366603	1.84050910921504	0.065693528149871	0.298225958140063
TRA2A|TRA2A	1544.78440222505	-0.581813948533771	0.413062254589402	-1.40853816118375	0.158971775304867	0.460540666554334
RNVU1-18|RNVU1-18	1116.98754356885	-1.65031385028574	2.14051390647853	-0.770989548486866	0.440713126571339	0.73582929064312
TRIM40|TRIM40	7.15684594938365	5.5859932090571	3.17118781768704	1.76148293011902	0.0781566996595997	0.323621435020297
ATP6AP2|ATP6AP2	2150.48777256163	-0.52539700146746	0.292679700609169	-1.7951262092107	0.0726335938252619	0.313233282670193
THOC2|THOC2	2204.77441014614	0.660590197712386	0.343390728155071	1.92372753120484	0.0543887452268836	0.270549142923472
ECSCR|ECSCR	17.9210550527195	3.28473567176961	2.22749657246656	1.47463107794251	0.140311754890445	0.432851875585413
BEND6|BEND6	14.4207045564809	3.27835665496763	1.90678399824997	1.71931202379319	0.0855575717507899	0.338110848363307
BRIP1|BRIP1	436.115480921245	1.17596029066941	0.648295137809486	1.81392736438351	0.0696889091807673	0.307102134520506
AK1|AK1	763.747185253697	2.47816040321107	0.757825786100789	3.27009247859175	0.00107512329789385	0.027071541211864
CCDC101|CCDC101	295.75268869512	-0.114477420618161	0.479949286675735	-0.238519826565561	0.811477939658603	0.930951322718671
SLF1|SLF1	485.828047314745	0.309830472173069	0.52488066671199	0.590287453553852	0.554997949399802	0.809113670624945
NUDT5|NUDT5	619.960277041563	0.636103008781176	0.417127461396889	1.5249607557627	0.127268886377886	0.414564859424399
SH3GL1P2|SH3GL1P2	17.9803853755529	0.950484052952707	0.808630646009991	1.17542422815987	0.239825035118148	0.559865034806102
SGMS1-AS1|SGMS1-AS1	54.5893254062847	0.115313344889318	0.537097286430678	0.214697314253144	0.830003316670241	0.939269297507248
FAM87A|FAM87A	21.1632909670134	1.01665554504638	0.641919684689577	1.58377374817229	0.113245215322104	0.389311783322383
ASTN2-AS1|ASTN2-AS1	7.61682611066927	1.72594001629111	1.93616368598473	0.891422573816791	0.372702511839991	0.685939767370884
RANBP1|RANBP1	768.152567016951	0.142808015572573	0.284958056771394	0.501154510915057	0.616262385695357	0.84211349431158
EIF4E2|EIF4E2	1000.67242376355	0.362464977729602	0.256174345283962	1.4149152106852	0.157093357664449	0.457115698320688
ZNF675|ZNF675	459.099455147259	-0.551851906126186	0.433807509021404	-1.27211238775251	0.2033331903788	0.518599520885115
CD8A|CD8A	543.462567174797	3.07818115793686	1.13205759557302	2.71910295904931	0.00654592291070744	0.0844048307640463
HDC|HDC	18.3655363404754	-1.84631630527898	1.63392998845817	-1.12998495548835	0.258482563856396	0.580779272352427
NUDT9P1|NUDT9P1	9.29497298784035	0.00239397529697365	0.971008434605523	0.00246545262806724	0.998032855405542	1
PLEKHM2|PLEKHM2	1460.85583462967	-0.257406505771778	0.439896698480011	-0.585152165636166	0.558445405346487	0.80972693327029
TWSG1|TWSG1	152.926281048354	0.21662454785732	0.436527244238766	0.496245195955819	0.619721427216022	0.843137437987176
YTHDC2|YTHDC2	1416.35153866772	0.450734487351243	0.371384621690009	1.21365953522832	0.224877762447159	0.543168245684479
UQCRH|UQCRH	1496.10155048418	-0.540344691497918	0.322721752026408	-1.67433613664102	0.0940645562866695	0.353949769655283
TAGAP|TAGAP	6591.87894615007	0.442860546246734	0.400938256609469	1.10456046273005	0.269350090898371	0.591655269147836
GLRX3|GLRX3	703.096854776014	-0.110469318247299	0.29530901624972	-0.374080411259384	0.70834449200793	0.88780979131924
TMEM87A|TMEM87A	1658.31876151483	0.137833252324204	0.239630964692998	0.575189656732338	0.565163037260145	0.813324064073607
SCARNA22|SCARNA22	248.749795737868	-0.905222607094123	0.716884551667122	-1.26271741382768	0.206690753567332	0.522604346105078
PI4KB|PI4KB	1541.6761762675	-0.161360149747569	0.224734751691805	-0.718002661060868	0.472755646037852	0.756196419859291
KANSL1-AS1|KANSL1-AS1	40.8819907128887	-0.969479195510533	0.626781760807261	-1.54675719067175	0.121921806617957	0.405405810084955
TMEM176B|TMEM176B	350.498787783334	-2.86079023713399	1.52193412059218	-1.87970701124754	0.0601480195179505	0.284997776633486
ZFHX4|ZFHX4	1667.16907261847	9.29493645237148	2.04364297101793	4.54821932411301	5.41017367555054e-06	0.000634229730123377
MARVELD1|MARVELD1	137.176760907759	-0.356611299142136	0.774342972544981	-0.460534042131338	0.645132942526877	0.857765544767823
BTBD6|BTBD6	823.755967847599	-0.261231518997704	0.473447657849647	-0.551764307345383	0.581109844419149	0.823475369601066
TTC14|TTC14	2015.27573092873	0.652598500459365	0.459617877195371	1.41987188235927	0.155644983111844	0.454605842888864
FLJ38122|FLJ38122	12.2662447970745	-0.845119406354002	1.19735022508872	-0.705824735859034	0.480297137325322	0.762199833715149
F12|F12	9.2677716689042	-0.900347367591937	1.3963528245932	-0.644785008297769	0.519066518452752	0.786014404861241
PARGP1|PARGP1	246.431459588233	-0.027767512334496	0.379720748762517	-0.0731261392088484	0.94170574125773	0.982598676831725
MRPL54|MRPL54	485.381671877211	-0.546074151879804	0.448703725787225	-1.21700382790838	0.223602759440364	0.542282815408081
C17orf75|C17orf75	222.418505131084	0.545673669426385	0.353016750440086	1.54574441225841	0.122166306707124	0.405763266168097
HNRNPF|HNRNPF	5173.14681561767	0.131781523977588	0.28658618716066	0.459832085011518	0.645636751273192	0.857786675981766
TMEM81|TMEM81	29.1331690176583	0.907075732671286	0.477669405273748	1.89896133739495	0.0575695595787321	0.279291708192133
LINC00092|LINC00092	6.14465730459138	4.47811412067746	1.63518197627856	2.73860291126068	0.00617008464569775	0.0807170000546758
IRAK1|IRAK1	1801.24389956321	0.168309062643389	0.369939037899181	0.454964319524609	0.649134908448299	0.859671953846045
CSF3R|CSF3R	1699.17031079283	-0.626648881451191	0.99120559192456	-0.63220878348201	0.52725045858161	0.79034329870096
CILP|CILP	13.3891065118021	-0.270888289482261	1.3863629861388	-0.195394923400775	0.845083790558828	0.945430568310636
WDR89|WDR89	513.511100629655	-0.120858897414797	0.374200705900733	-0.322978806584233	0.746711292533843	0.904680660431323
LOC93622|LOC93622	383.790027397343	-0.349593465186016	0.267724299649086	-1.30579654384842	0.191621755713602	0.504599815438144
PMPCB|PMPCB	1785.37237329761	-0.222548702039499	0.245069848877744	-0.908103151238813	0.363823725722525	0.678597033271598
PRSS1|PRSS1	12.5487144058166	1.77839368439334	4.72996161572731	0.375984802599689	0.706928194269401	0.887138674720976
ZGRF1|ZGRF1	474.519175295894	-0.0314130484464964	0.502561706675469	-0.0625058535683091	0.950160000583692	0.985786800213506
SH3TC1|SH3TC1	739.984008857981	-1.86365614663438	0.605798112110843	-3.07636506185312	0.00209541122487442	0.0415214422731272
BTN1A1|BTN1A1	4.35702293293945	3.57591189734057	2.09896593798305	1.70365408634346	0.0884457305464832	0.344343332243914
RAP1GAP2|RAP1GAP2	1268.30131644356	1.19393893743139	0.475309093921629	2.51192109029635	0.0120075934901459	0.11964334948067
PHKG1|PHKG1	74.5175709386301	-0.489175631342643	0.618745811604224	-0.79059223055483	0.429181982123208	0.728039323170809
IFIT5|IFIT5	1153.87620117475	-0.631836458056814	0.671858285228496	-0.940431147383901	0.346996451637227	0.664489447263122
PDZK1P1|PDZK1P1	34.9498757623007	0.963670034600464	0.910624312929456	1.05825203755033	0.289940552834253	0.612271589396938
APOBEC3A_B|APOBEC3A_B	190.32144534764	1.26521905371477	1.12354139096862	1.12609919303819	0.260123535574743	0.582633035860931
SLC22A1|SLC22A1	6.22297176111988	2.35889657465413	1.71257204870217	1.37739990352041	0.168388642701202	0.473761925597571
TNFAIP1|TNFAIP1	390.502521793285	-0.0247271279250235	0.357675059536766	-0.069132938586907	0.944883802538991	0.983900962302266
STXBP1|STXBP1	31.8062830367294	-0.462147498268853	1.02560817540139	-0.450608243336186	0.652271924373779	0.861415614632052
FCHSD2|FCHSD2	801.860254792315	0.218211998224178	0.370177805079075	0.58947888077073	0.555540075293965	0.809222524067737
KIAA1143|KIAA1143	1641.42688260181	0.528128922586841	0.3451838434264	1.52999316927604	0.126018419715696	0.412934061686442
PRKAR2B|PRKAR2B	629.233245389477	3.4350138073427	1.10240425626632	3.11592937692074	0.00183366181388404	0.0377159933573836
SCAMP2|SCAMP2	933.752970608566	0.0950054447163624	0.338877383925532	0.280353452968227	0.779206344747019	0.918320621795033
MTO1|MTO1	975.339317899291	0.10685034530384	0.352841781216998	0.302827927393684	0.762020999142067	0.91091046632737
ZDHHC16|ZDHHC16	276.293355145141	0.537340822384439	0.403140218994579	1.33288815421233	0.182568510516242	0.492464782988352
C1orf174|C1orf174	406.708805803199	-0.208773175091316	0.306999085457242	-0.680044941438086	0.49647600506084	0.773197301878638
H2AFB3|H2AFB3	8.59565406403097	1.18336520779405	1.32477838930617	0.893255217133953	0.371720514199193	0.685092585383636
CLCN7|CLCN7	1103.92731497881	0.806864916209014	0.454993649152205	1.77335423848763	0.0761700267808793	0.319895374465725
RAB43|RAB43	598.818385199692	-2.01324794622392	0.924334598197019	-2.1780510544027	0.0294022359858127	0.193580783937445
ILK|ILK	1254.44379191702	0.629264920057526	0.386978468740553	1.62609801549298	0.103928806141001	0.370838997656757
MAP1LC3A|MAP1LC3A	151.693958696334	0.538656499417565	0.677747811418991	0.794774236584826	0.426744840065389	0.726721985994645
ZC3H12A|ZC3H12A	1613.65687233432	0.161827258685777	0.605408653436219	0.26730251998756	0.789236246668979	0.921943709425277
MAGEF1|MAGEF1	266.253075585099	0.431393561021149	0.591836544083156	0.728906596481708	0.46605879944295	0.752179601445457
E4F1|E4F1	697.858892969946	0.910043989048782	0.458208726904386	1.98609047714336	0.0470232784794668	0.249925719622351
DHX40|DHX40	1214.09463417349	-0.844420806816045	0.258611901144626	-3.26520474532922	0.00109384977638361	0.027346296345879
MIR3680-2|MIR3680-2	4.78960295700357	-0.933510548067177	1.01501646669638	-0.919699905071998	0.357729602264104	0.672916961902416
TMIGD2|TMIGD2	36.8747772860621	-0.949739771579769	1.14437981774865	-0.829916568651309	0.406585956453185	0.713214961112941
ACVR1C|ACVR1C	37.8976028311672	-1.90869171496452	1.1265103440726	-1.69434015853255	0.0902006636690549	0.34745165391654
BRD1|BRD1	2155.46614064788	-0.280854043288023	0.41259529244146	-0.680701036665053	0.496060680255709	0.77304864749662
SHARPIN|SHARPIN	393.950565165617	-0.14776625962482	0.482307164481148	-0.306373760347894	0.759320084604284	0.910439851363379
HEATR5B|HEATR5B	1779.47129511156	0.370428044891103	0.342452489386431	1.08169178607752	0.279389504185593	0.601252693237923
ZMPSTE24|ZMPSTE24	879.257012940815	0.51345547635916	0.276939258944716	1.85403643497746	0.0637339475639917	0.292905897625452
SEMA3G|SEMA3G	641.109633801776	3.21638428989953	0.87960569115134	3.65662059972522	0.000255562203199371	0.0104127874296412
CETN3|CETN3	122.027530213431	0.361364668231218	0.61010116105797	0.592302869256272	0.553647794898402	0.808681994738665
PPM1F|PPM1F	840.60562152678	0.234131048393463	0.533522020295243	0.438840459225841	0.660777141730466	0.864693190527557
CPSF3L|CPSF3L	1121.72450182332	0.404034150813786	0.32411910202137	1.24656074971831	0.212558601127571	0.530489036930232
BCOR|BCOR	1839.72989131361	-0.0955093216152727	0.413330070167275	-0.231072763655013	0.817258274016121	0.933369158241038
ESD|ESD	870.371689003199	-0.688853256573865	0.363803240763251	-1.89347751583704	0.0582943955221209	0.28073396907014
WDR55|WDR55	583.447436144618	0.435980417146788	0.285460358052951	1.52728883309926	0.126689205041877	0.414095342613366
PHIP|PHIP	4874.04452529375	0.263692705005904	0.383647575155392	0.687330566077731	0.491874441379812	0.770322031303197
BAG3|BAG3	427.750496172977	-1.0881955919763	0.535080045169276	-2.03370617499301	0.0419812292002736	0.235680218647508
RFT1|RFT1	421.287828751376	0.191096922462728	0.309692138188084	0.617054483787606	0.53719878932845	0.796694124200945
IPO9-AS1|IPO9-AS1	5.1015264332222	0.106132272056066	1.25231066922363	0.0847491558319646	0.932460815805232	0.979684263626625
RNU1-1|RNU1-1	5234.19946740831	-2.03616231082618	0.822461580534586	-2.47569291869258	0.0132977897855817	0.126417504083174
RCN3|RCN3	54.8100238379941	-0.403242957090261	1.04007070790995	-0.387707253000702	0.698232687726186	0.882783710646631
NFASC|NFASC	244.204479256975	9.16295140359411	2.08456751032861	4.39561269097477	1.10460738813506e-05	0.00109638705408382
SCAMP5|SCAMP5	50.6624505131378	1.12363218867587	0.978965526685583	1.14777503195652	0.251061447157674	0.573143497340302
MEIS3P1|MEIS3P1	12.5753691373442	-0.0201447957770764	0.879718450235865	-0.0228991398005524	0.981730726556415	0.995906290556249
TNS2|TNS2	74.6941689182105	0.139661918296198	0.617978099506992	0.225998167908566	0.821202845266999	0.935011438197025
EXOSC1|EXOSC1	503.625657350885	-0.407044361593543	0.283569069588847	-1.43543286361846	0.151163786765148	0.448811855244278
SNORD94|SNORD94	1003.32227136384	-1.36115062633624	0.731553839883298	-1.86062946037352	0.062796521531603	0.291083957531232
FBXL19|FBXL19	279.835824508102	0.908812939800734	0.5998544376045	1.51505579158512	0.129758275857881	0.418521308415972
ZNF285|ZNF285	6.40343662158326	1.27080938951628	1.3574338536851	0.936185130543445	0.349177877667286	0.665642661776499
SLC7A5P1|SLC7A5P1	75.243775406347	-0.122011536240921	0.753157582826841	-0.162000010386901	0.87130584569028	0.95642479058033
PEX10|PEX10	111.851661118998	-0.113188200864865	0.504101943387534	-0.224534347366818	0.8223415437703	0.935681433156873
MIIP|MIIP	426.48131141556	0.557124593117067	0.440614517238473	1.26442632124065	0.206077050447366	0.522135263466522
NOTCH4|NOTCH4	48.4273576329436	-0.377867346458581	0.581182560850516	-0.65016979502207	0.515582549466572	0.784298056282577
PGGT1B|PGGT1B	803.535452399604	-0.0881561177686769	0.280087461136289	-0.314744963630417	0.752955301940198	0.907812838222329
CACNA1C-AS1|CACNA1C-AS1	5.02355780007853	0.461934223260897	1.10402888619539	0.4184077328382	0.675649033753003	0.87323530037374
MTG1|MTG1	205.053580365202	0.44806659933093	0.332348890180283	1.34818142190237	0.177600038424037	0.486619345278812
LOC101927539|LOC101927539	21.8620909419532	0.165422642075924	0.842874953680756	0.196260004350039	0.844406664467907	0.944866932305619
SMAD3|SMAD3	2432.3132391435	-0.579864601316091	0.432685695994559	-1.34015200105756	0.180195932880812	0.488690224962863
PMS2P1|PMS2P1	291.534472951048	0.236908195831106	0.230382136613992	1.02832710605531	0.303795984637192	0.625848322641022
PPFIA3|PPFIA3	49.9846497790861	0.858395075274932	1.10527970706926	0.77663153479135	0.437376190896677	0.733792791036338
METTL21EP|METTL21EP	6.93647758146142	0.289481573533276	1.54729832773994	0.187088403279093	0.851591320467589	0.948412979185417
TAB1|TAB1	392.225982266052	0.483462754659458	0.330428504682581	1.46313876620265	0.143429412108253	0.437098701091057
DDX56|DDX56	914.145488031803	0.0621043310205662	0.297263954069294	0.20891981745654	0.834510833425849	0.941267171358888
TNS3|TNS3	524.165598491589	1.27940672616577	0.821424790225718	1.55754579285853	0.119340957194841	0.400587656553346
RBM15B|RBM15B	2068.71870928461	-0.170565741635057	0.370854669618524	-0.459926099381486	0.645569265831233	0.857786675981766
PSMD2|PSMD2	2554.85658220239	0.508677068249072	0.313793603832947	1.62105620393676	0.105005585507448	0.372348381644917
ARHGEF11|ARHGEF11	584.229004532953	0.861552504970319	0.614491570881282	1.40205748263513	0.160898082092934	0.463233563008911
ALG10|ALG10	245.994194786267	0.32794689393312	0.368308612853082	0.890413317768209	0.373243993933939	0.68597496656693
PTGER4|PTGER4	4157.04361340894	-0.31589370733274	0.64094784386789	-0.492853997957829	0.622115753485431	0.844794793469876
GLYATL2|GLYATL2	9.66988926887736	3.24062526712556	3.19484275600891	1.01433012971626	0.310425251749075	0.632559071122011
FUCA1|FUCA1	358.232674834923	1.06052907125326	0.414592929431503	2.55800086293674	0.0105275831017754	0.111011055412915
ITFG3|ITFG3	420.123709331562	-0.240822983245699	0.533896439640924	-0.451066846236447	0.651941371678045	0.861257413432768
MFHAS1|MFHAS1	739.504900117118	-0.739735745748827	1.17246311420806	-0.630924535522368	0.528089868329652	0.790875449211419
RFX1|RFX1	213.926489449856	0.312295602083888	0.477457133564381	0.654080921888201	0.513059672072966	0.78330841724465
GID4|GID4	203.915596626257	0.626841063236133	0.310355276842488	2.01975319902252	0.0434089938802132	0.239521119432127
MSANTD4|MSANTD4	510.342944426828	0.0632561256513861	0.387596853422188	0.163200823466141	0.870360317868215	0.956348802641833
ADD1|ADD1	4362.9191941304	0.108167151218237	0.336919673589179	0.321047299096372	0.748174547063433	0.905746409549491
MSS51|MSS51	71.9693984194526	1.60757580595563	0.671072922064071	2.39553072862943	0.0165963230531806	0.142449686859678
ZDHHC18|ZDHHC18	1115.29958005432	-0.185592375128408	0.37789898796607	-0.491116359234789	0.623344151606354	0.845682157594883
LDHA|LDHA	4873.22958171299	-0.52503035811208	0.31531966523448	-1.66507330813527	0.0958981311991305	0.357285455481253
PCDHGA10|PCDHGA10	96.034598956828	5.00293530102736	1.54581549840482	3.23643753487404	0.00121031712593746	0.029267045288958
LINC01031|LINC01031	7.08021875451699	-0.308346329300892	2.31688906944269	-0.133086358500134	0.894125083513553	0.964642531960527
ZNF431|ZNF431	602.232208454082	-0.475833916042797	0.314185115746422	-1.51450177680231	0.129898623520896	0.418612379444889
AMACR|AMACR	91.390149035842	0.391408439201707	1.11875043436365	0.349862156187086	0.726442149264299	0.895399920275467
HMG20A|HMG20A	588.386969154548	0.586509940341827	0.345426476893988	1.69792989123363	0.0895209948382871	0.346661959985801
MMRN2|MMRN2	29.0366987904742	0.819583242108616	1.26736176076602	0.646684528033448	0.517836138596634	0.78541457730081
C19orf44|C19orf44	56.7823964580962	0.809402222336737	0.537276097597485	1.50649214799636	0.13194088130985	0.422052599910391
SNORD22|SNORD22	243.400599959292	-1.49596139498698	0.594875274102383	-2.5147479818257	0.0119117498456935	0.119341193289718
FAM72B|FAM72B	102.999966552081	0.458626389610448	0.687770670236951	0.66683039777262	0.504880473652776	0.77742576406604
UBE2I|UBE2I	1353.1093386038	-0.113391244864466	0.309489709883522	-0.366381308467869	0.714080565253977	0.890512767951302
TNFRSF14|TNFRSF14	1655.93834969549	-0.346393238100279	0.343934732287236	-1.00714817545961	0.3138635732038	0.635359116227389
PTPN7|PTPN7	2738.58706780943	-0.0423237334853371	0.400348525311601	-0.105717220894958	0.915806716621048	0.973697097699568
RASGEF1B|RASGEF1B	873.906797839475	0.702610599576173	0.888471251405543	0.790808479694371	0.429055760877224	0.727971929961274
BTN3A1|BTN3A1	2498.30457371539	0.819597926115037	0.451963732192045	1.81341525378585	0.0697677986284873	0.307136631816796
RPS20|RPS20	18415.6128487694	-1.32493743829661	0.353582888886587	-3.74717634800927	0.000178836362227551	0.00834178791242827
CLINT1|CLINT1	2441.70814860632	-0.322971395332952	0.223428929523834	-1.44552183113109	0.148311365462053	0.444546212072333
PSENEN|PSENEN	256.534452653578	0.190987047746221	0.412181445399841	0.463356732520921	0.643108686812009	0.85662443671682
EPHX2|EPHX2	623.738466971826	0.0497751110582663	0.764440509415182	0.0651131258027464	0.948083929731959	0.985273165920341
LEMD3|LEMD3	1460.67910188923	-0.0741806262121385	0.276363856352448	-0.268416525920581	0.788378720253592	0.921746084517323
GLOD4|GLOD4	966.589562408731	-0.0475390626056335	0.311876919893547	-0.152428921710077	0.87884864737297	0.960007695088609
EMD|EMD	525.143259039826	-0.425668755408491	0.53493012238957	-0.795746467794707	0.426179412179083	0.726483766821898
TTC12|TTC12	361.088002881785	0.707550329324392	0.349886227092887	2.02222972651208	0.0431526246165335	0.2390336169544
KDELR3|KDELR3	128.070821287983	0.0762383316121127	0.665515762832393	0.114555260551076	0.908797643077772	0.971122603947025
ZSWIM4|ZSWIM4	107.460468521229	0.42178565832928	0.414684740151101	1.01712365440694	0.309094608825614	0.630722630012804
CDH3|CDH3	7.07997939365707	-1.79602239267602	2.03385093497067	-0.883064909917758	0.377201201867529	0.689603337811825
CRTC1|CRTC1	246.392614511656	0.422021301097744	0.482427227043169	0.874787485947555	0.381689547475986	0.69299201898437
GPR19|GPR19	63.2586526915599	1.14597017126461	0.784894059723054	1.4600316527672	0.144281374905341	0.4386273281977
TRAIP|TRAIP	76.1730707102887	0.627160864850008	0.596959253385975	1.05059241697441	0.29344582529854	0.615261731655362
MAGI1-AS1|MAGI1-AS1	32.3792634246888	4.01998801123819	2.0283736067437	1.98187749923041	0.0474929528403975	0.251644845093503
LINC00494|LINC00494	13.2532606156961	3.08183576423366	1.52683594167078	2.01844591165524	0.0435448419213646	0.239883040103755
MCCC1|MCCC1	474.420225477381	-0.0511219065816176	0.308044078574949	-0.165956465769814	0.868191210285183	0.955784206370919
CELSR2|CELSR2	124.727708701335	-0.474179376226288	0.783330685674146	-0.6053374199406	0.544954822745003	0.802611794674085
C9orf91|C9orf91	356.661484681987	0.268750818159299	0.47466816705957	0.56618673172067	0.571266848615268	0.817131014914133
GRPEL1|GRPEL1	633.950516753894	-0.750851367230206	0.370885589246776	-2.02448245227078	0.0429205356952488	0.238444316755381
CES2|CES2	496.484064473145	0.250519314104013	0.304095514425656	0.823817853996196	0.410043061341395	0.716065378807312
TMPRSS11D|TMPRSS11D	7.01009425319364	3.25348766708008	2.08985393623104	1.55680146381312	0.119517629569767	0.400705907026923
TBCE|TBCE	240.685096810242	0.362337928579318	0.318001408388216	1.13942240198187	0.254527016687896	0.576807647210609
FLJ32255|FLJ32255	568.325232513471	-0.180240096564213	0.275370954306209	-0.654535613671832	0.512766790371394	0.783141406800898
LRRCC1|LRRCC1	133.760150165736	0.907371312529125	0.839953819523032	1.0802633328632	0.280024932885563	0.601937251853731
ZNF385A|ZNF385A	277.158673492269	-0.903925019751162	0.823377514540929	-1.09782572852398	0.272280594473081	0.594228828108592
SPRYD7|SPRYD7	48.8809895497704	-0.620532856572681	0.557868975256319	-1.11232723828668	0.265997476599714	0.588226544107553
MAGI2|MAGI2	9.93964573896896	0.207267623654692	1.18658989953051	0.17467502777219	0.86133499102506	0.95256273672215
TPTE2|TPTE2	11.8572576236691	2.81573708546589	2.00683677931448	1.40307229491166	0.160595281802603	0.463076594619645
CELF1|CELF1	3198.09403382298	0.0729251022687435	0.317268963037761	0.22985261958972	0.818206294661236	0.933468181131824
APOBEC3A|APOBEC3A	494.96289646203	1.24665575469822	1.09543961297043	1.13804151313987	0.255103148280835	0.577449078155717
TNIP1|TNIP1	3551.85158776045	-0.0130633973739186	0.369391778003355	-0.035364613269221	0.971789001571395	0.992569408398641
NUDT7|NUDT7	56.2580521243979	-0.375655046507641	0.806761735186868	-0.465633197663531	0.641478076196261	0.855771955678875
AMPD2|AMPD2	1117.61033981999	-0.776417863355236	0.448374270439371	-1.73162894158581	0.0833396497986517	0.333731236863344
ZFP62|ZFP62	563.642193949915	0.484361859240046	0.385513179473104	1.2564080426564	0.2089680671673	0.525792607616824
ZNF221|ZNF221	20.8812427467395	1.58547356869816	1.03299147250399	1.53483703486433	0.124823863175809	0.410754239039594
SET|SET	8215.83067792883	-0.47560650657945	0.239083788126301	-1.98928798270588	0.0466694253494215	0.248864044374925
SLC25A21|SLC25A21	47.2042943021609	4.55337229234985	1.96695101381977	2.31493934539189	0.0206162517281176	0.16159809435373
TXK|TXK	1240.60538510203	0.331055862439313	0.918182186740449	0.360555745058138	0.718431577214362	0.892356974142666
ZNF763|ZNF763	58.5039668186333	0.436002269464627	0.647058360531695	0.67382217132062	0.500424377358674	0.77475299635695
CETP|CETP	33.2006956692682	1.72178898803805	1.146413022148	1.50189238500797	0.133124903586505	0.423383075512361
EHMT1-IT1|EHMT1-IT1	33.0336424706084	1.24299022438597	0.794932232623816	1.56364300423856	0.117901429675303	0.398028550517335
E2F8|E2F8	83.9968341494248	0.17096408045559	1.20935810902004	0.141367622361358	0.887579530975232	0.962197241491266
NME9|NME9	59.8141898330989	0.952406900490146	0.64465697554047	1.47738555018607	0.139572317296951	0.432175244754922
PAQR4|PAQR4	148.419594872892	1.51732300630968	0.669501020689412	2.26634905611829	0.0234300200882494	0.172593584279946
FUBP1|FUBP1	2891.75412823486	-0.156280258926089	0.271134007723431	-0.576394898737684	0.564348291679581	0.812641633055457
LOC102723704|LOC102723704	22.6857381521546	0.481037191999392	0.944672152106317	0.509210725569535	0.610604525888529	0.838600985111223
LGALS2|LGALS2	168.90072922758	0.00482838903124627	0.807100612405237	0.0059823880158599	0.995226773436904	1
HIST1H2BF|HIST1H2BF	994.506962590526	-1.24246598202953	0.631215318108955	-1.96837108730474	0.0490253560702048	0.255697411641301
CNIH2|CNIH2	21.8245685800896	-0.652206808358571	0.821394703055231	-0.794023635570871	0.427181671785647	0.727175740425223
JUND|JUND	4284.58830890248	-0.980008235187785	0.783748126868967	-1.25041221993457	0.211149002939125	0.528663711092864
GALNT8|GALNT8	11.5606956416584	2.98878346826211	1.62374763257485	1.8406699466731	0.0656699406236471	0.298225958140063
C12orf66|C12orf66	238.510209563743	0.36745036117359	0.373057603129276	0.98496950093323	0.324639052331166	0.64399696739457
XYLB|XYLB	67.5353432100917	5.38418082462144	1.54528591187828	3.48426189822505	0.000493496333809965	0.0162018642515456
CBLL1|CBLL1	1653.20499988898	-0.229131330635084	0.40411419671607	-0.566996488856519	0.570716567111235	0.816837027406983
EVC2|EVC2	569.380492284658	5.83225679102942	0.741360014413367	7.86696972812115	3.63334516610879e-15	1.03380781126349e-11
FSIP2|FSIP2	47.699837620055	-0.368601873323141	1.29663685953723	-0.284275331687468	0.776199389101163	0.91729724288627
TMEM50B|TMEM50B	776.855090464206	0.190760930119533	0.255138455039058	0.747676119973097	0.454655538430225	0.744924878075428
TIMM44|TIMM44	391.887625580314	0.11603606518928	0.388598544405302	0.298601389171072	0.765244205374148	0.912289893548067
DNAJB7|DNAJB7	24.468726726229	0.61618351785007	0.757721089765855	0.813206239304331	0.416099822775861	0.720326093237929
GMIP|GMIP	1502.89504748239	0.282209734091145	0.323339169750019	0.872797855914977	0.382773268487713	0.693904984284903
PTK7|PTK7	112.821028896998	1.60102172047802	1.57629226040363	1.01568837245198	0.309777806782053	0.631616710543797
ZSCAN5A|ZSCAN5A	19.655250927103	3.24004624385924	0.911116334297211	3.55612792998431	0.000376360862504105	0.0135460993534817
VPS8|VPS8	1516.83704878637	0.52163696028005	0.372484599228217	1.40042557829471	0.161385914910296	0.463678953104775
UBXN4|UBXN4	2863.14911554543	0.226174031116362	0.296191324419099	0.763607886084923	0.445100948340682	0.738483314281332
SNORD104|SNORD104	24.7342163456715	-0.573751654503971	0.579223973835243	-0.990552325907649	0.321904226586289	0.641588442075291
ACYP1|ACYP1	104.488311380287	1.83072055829989	0.619232009489126	2.95643721617404	0.00311215584588109	0.053130724600882
PER3|PER3	246.549501678597	0.189171659287221	1.04739055329081	0.180612340537978	0.856671868841286	0.950669666202446
SKAP2|SKAP2	851.758451255598	1.07790497751682	0.909403618896029	1.18528775905394	0.235903691664093	0.55557288234093
SSPO|SSPO	27.4135008686654	-0.655369498047504	1.50024658030939	-0.436841187741518	0.662226526364087	0.865220503714554
MT2A|MT2A	426.586146060043	0.369297122141346	0.606499429991925	0.608899372166372	0.542591140414069	0.800753453418827
LINC00341|LINC00341	769.02134942707	1.0812534433683	0.543648240612435	1.98888428692465	0.0467139765195523	0.248864044374925
CXCR5|CXCR5	153.033110938522	-0.517162312481955	0.896960837883973	-0.576571786235391	0.564228763034705	0.81259603868133
OGFRP1|OGFRP1	10.1758476056449	3.67189941370216	1.25051679302883	2.93630556116611	0.00332146971714975	0.0552671842214235
POM121L9P|POM121L9P	11.5128452539011	0.706696670649553	0.808584418596956	0.873992442095041	0.382122369671647	0.693450490600913
MIR378J|MIR378J	5.25491054966963	-1.43988603328687	0.931631551445817	-1.54555310095744	0.122212535164055	0.405836833917739
RFK|RFK	369.172744680024	0.120097732622641	0.30015866899858	0.400114156367107	0.689072437936514	0.878882679152197
KLHDC1|KLHDC1	88.1848489944595	-0.12669305010978	0.493886618019723	-0.256522540776192	0.797547377561576	0.925063265395192
C5orf28|C5orf28	264.6225589127	0.43006412478866	0.3209034761285	1.34016661326675	0.180191183317932	0.488690224962863
KAT5|KAT5	678.211826507525	-0.106830517059658	0.308048311567222	-0.346797930870481	0.728743131705105	0.89620391474352
ZC2HC1A|ZC2HC1A	337.935532335603	1.7103126048317	0.770521518084223	2.21968181898945	0.026440373856819	0.182194178957083
MRPS22|MRPS22	553.006855234643	-0.512251037718914	0.335635207987597	-1.52621365556454	0.12695666372691	0.414338398613231
KYNU|KYNU	326.847928564069	-0.384035758693857	0.885009455514498	-0.433934074151331	0.664336315196182	0.866627154659526
HIST1H2BI|HIST1H2BI	1276.11625681837	-1.54847852047989	0.724412906263568	-2.13756340767967	0.0325521942970459	0.206238892934154
TBC1D8|TBC1D8	378.952762159555	0.143984016519197	0.704946013476596	0.204248288190337	0.838159478096377	0.942439479026631
OXNAD1|OXNAD1	1533.22462911951	-1.13050829314632	0.505273414041074	-2.2374189136625	0.025258973517389	0.178282580399223
VAV3|VAV3	651.796836483513	0.132533578259448	0.746041608913314	0.177649043533238	0.858998605923512	0.951745724462205
GIMAP8|GIMAP8	1159.62939494192	1.4515318027008	0.844042487911826	1.71973783724077	0.0854801066902716	0.337882931562009
PPRC1|PPRC1	678.069673570022	0.580275805996204	0.330571752383533	1.7553702087738	0.0791960043996719	0.325008218055577
WDR62|WDR62	136.49331349781	0.869582191025666	0.558688340193109	1.55647098474455	0.11959613704225	0.400705907026923
VWA2|VWA2	4.69576604954749	0.978518008801179	2.09108004273235	0.467948614498076	0.639821337006338	0.854764055510775
IL1B|IL1B	1214.38695590425	3.65636031022565	1.28957576293693	2.83532027765358	0.00457797649947285	0.0670284861054893
SSTR2|SSTR2	6.95462535286088	0.945342258174487	1.86301627989276	0.507425656113376	0.611856187781675	0.839279653414795
HMG20B|HMG20B	482.98469529788	-0.143415056755008	0.371397226315711	-0.386150047962652	0.699385545918157	0.883639358329868
GZMA|GZMA	447.827684548687	1.7943273555019	0.953236015660608	1.88235371515879	0.0597880058085817	0.284080388300614
LSM14A|LSM14A	3182.94458962175	-0.61922036774265	0.289848014473418	-2.1363622892764	0.0326498953326001	0.206673716395309
RND1|RND1	27.5075149917229	-1.66584058138931	1.32607295405634	-1.25622091627286	0.209035885316668	0.525872060872708
TXNDC16|TXNDC16	490.944726031017	-0.00795961943541052	0.394522200205925	-0.0201753397686009	0.983903499895285	0.996866501496279
LEF1|LEF1	9537.89373018732	0.384577809311001	0.441728235168151	0.870620844883518	0.38396121102878	0.695167157317937
TMOD3|TMOD3	2258.33242634649	0.352253791443621	0.269796383463882	1.30562829242215	0.191678994149805	0.504599815438144
BMPER|BMPER	5.12813495679282	2.28557866341205	2.10427473291968	1.08615981917951	0.277408290736844	0.599027869903796
C1orf52|C1orf52	459.551727640653	-0.482511155912298	0.298498528010343	-1.61646075486034	0.105994731886106	0.374336380380554
DST|DST	2006.07493541837	0.433371320783755	0.864068448885337	0.501547442616162	0.615985897521326	0.841972836095635
NT5M|NT5M	49.9194650805742	1.57322986085101	0.923258807322119	1.70399659161023	0.0883817240043618	0.344236418421376
ZC3H4|ZC3H4	857.190126451187	0.653317964387114	0.302333425312193	2.16091873967455	0.0307016170533949	0.199292017618083
FAM20B|FAM20B	2152.081078994	0.791713365613565	0.408251972080438	1.93927627974219	0.0524677056140553	0.265165384915083
CD52|CD52	9743.94912363661	0.123325220979888	0.560228697570083	0.220133708813552	0.825767022806285	0.93742684435327
LOC392232|LOC392232	13.3284597789997	4.26551065503789	1.75750989499714	2.42701942514232	0.0152234407274658	0.135883864603605
MURC|MURC	17.9217594524711	2.39560156628586	1.80603998766262	1.32643882895763	0.184694384472998	0.494697894591248
KCNK7|KCNK7	35.8212936722137	-0.306330876846217	0.78028200112912	-0.392589956455404	0.69462235877141	0.880959283035845
SNCA|SNCA	66.8368543920155	2.53828087206086	1.18831684148721	2.13603037796228	0.0326769378158449	0.20671911327954
C12orf40|C12orf40	10.784302459555	0.031512023611124	2.07891114555679	0.0151579463501718	0.987906171755217	0.998815985354204
DEXI|DEXI	217.726374951749	0.635907194407806	0.353147002018851	1.80068693992159	0.0717522372355572	0.311218037115201
GREB1L|GREB1L	31.7289085624527	0.0534628037224818	0.615037537750676	0.0869260824599531	0.930730267182265	0.979076167437035
MIR3687-1|MIR3687-1	43.3192186887715	-0.447819816191064	1.05812381628005	-0.423220618703609	0.672134304682955	0.870603713748263
SYS1-DBNDD2|SYS1-DBNDD2	34.8486281609794	-0.332781014138074	2.50620725036899	-0.132782719421579	0.894365221235988	0.964730497684265
LRRC37A|LRRC37A	735.07291400262	-1.08597485764264	0.514650114152225	-2.11012264017768	0.0348477936504329	0.213685946071492
ATP6V0C|ATP6V0C	689.870971727123	-1.09316668226995	0.596048351254375	-1.83402349821017	0.0666505061338191	0.299988779519262
MOCS1|MOCS1	12.5564261832291	3.95478916003887	2.29807524177037	1.72091369688671	0.0852664857450402	0.337419794532196
SLC27A2|SLC27A2	58.6553436701391	1.41490557958729	1.03938145468206	1.3612957718397	0.173420238643335	0.480934099109652
MAGEA9B|MAGEA9B	130.015607982966	20.5639584057947	2.99346859125363	6.86960887643147	6.43781671929307e-12	5.23363843008435e-09
SLC47A1|SLC47A1	14.3488924713112	-1.080118002794	1.65156818489517	-0.653995404290592	0.513114766461118	0.78332247992705
ATXN2L|ATXN2L	2076.01729924177	-0.112808932949335	0.368176788248592	-0.306398818583769	0.759301007766473	0.910439851363379
PXMP2|PXMP2	77.7799123580836	-0.41771469645479	0.497203253542147	-0.840128646542295	0.400836259894445	0.709735700640118
TLN1|TLN1	14142.4785071934	0.86693011027326	0.405373488525819	2.13859597337245	0.0324684039029266	0.206097723712677
SNORA23|SNORA23	1319.1425819077	-1.56581287339086	0.692485437977127	-2.26114917010368	0.0237500214510866	0.173452932024344
TNFRSF10D|TNFRSF10D	158.31514988677	-1.75453548270616	0.725332603806159	-2.41893921974456	0.0155658408736174	0.137831968565558
SDHAF3|SDHAF3	162.706520184434	1.29109569863409	0.465055021265662	2.77622139229963	0.00549947461763683	0.0753654841394686
SNORD103A|SNORD103A	9.70432322100012	0.190868324066264	0.67507371788747	0.282737009320336	0.777378443939382	0.917737694138243
PTTG1IP|PTTG1IP	1882.15973090004	-0.471475474750085	0.311220585391425	-1.51492380928821	0.12979170003152	0.418550038333605
ZNF341|ZNF341	105.575675005977	0.362243026313748	0.394450882347456	0.918347613162805	0.358436907596477	0.6737666210777
SPTB|SPTB	107.706424116248	1.82460878059292	0.895572086055242	2.03736673909728	0.0416133043854403	0.234462815996118
SNORD72|SNORD72	7.91110549471611	-0.744808165861855	0.705817138639556	-1.0552423922398	0.291314480555914	0.613006386299836
ZNF592|ZNF592	2002.45600159957	-0.105113790901509	0.352630042813075	-0.298085183165259	0.765638149938947	0.912325835259302
IFITM10|IFITM10	70.7328339981785	-0.0410138621520151	1.06946101261552	-0.0383500302191568	0.969408601753649	0.991756685361692
RACGAP1|RACGAP1	679.419402829933	0.928034288993293	0.469873611412033	1.97507216079751	0.0482599595824473	0.253566127120496
LINC01588|LINC01588	134.753432980645	-0.430795642882521	0.594543213679891	-0.724582558458848	0.468708162174736	0.753180134097054
FAM161B|FAM161B	91.9340013799047	-0.21883387847466	0.47558465194011	-0.46013654473908	0.645418214416647	0.857786675981766
MBOAT2|MBOAT2	125.501903410501	0.813797103759189	1.06847378014525	0.761644430477801	0.446272249505109	0.738920915622467
FTO|FTO	862.744839369036	0.0331348528169215	0.24842571705304	0.133379318413508	0.893893400773861	0.964514482240636
P2RY6|P2RY6	9.96237215022438	-0.172835566903073	2.12120978007426	-0.0814797143246352	0.935060456855336	0.98050343620853
PTPRC|PTPRC	39005.335669484	0.0267717556301441	0.456714656960075	0.0586181223268349	0.953256275972911	0.987084163748903
PRKY|PRKY	1088.63426629567	0.165148780209625	1.56482543412674	0.105538149245246	0.915948800281975	0.973697097699568
SYNE2|SYNE2	22146.8910994425	0.480390265178566	0.523991706653189	0.916789825256755	0.359252785355898	0.674776118371096
CMAS|CMAS	368.849662487845	0.624620764858675	0.336388061612317	1.85684581630172	0.0633330932181188	0.291749208693935
DOC2B|DOC2B	34.0516557106959	4.02455992519782	1.66744390707915	2.41361038180145	0.0157953426769415	0.138550817327736
ALS2|ALS2	2105.91409986216	1.02997193630055	1.11273917375103	0.925618474299358	0.354644289065415	0.67041161587031
NLRP7|NLRP7	6.28150111325142	4.13401791004364	1.83120089419403	2.25754472005277	0.023974058412948	0.174163883074829
KPNA3|KPNA3	1305.80736773687	-0.0871968665492828	0.343446885507293	-0.253887486621075	0.799582482351492	0.925963446804787
SC5D|SC5D	670.004563299381	-1.3259585383517	0.551407947916335	-2.40467795823808	0.0161867230212804	0.140487918362633
NEDD8|NEDD8	1038.26736661432	0.302236968675087	0.308004306848362	0.981275137895672	0.326457079673504	0.645714594797391
LOC100129973|LOC100129973	54.2872998657641	-1.56182359412108	0.485164302846162	-3.21916428096383	0.00128564806681322	0.0303576539372549
TMEM134|TMEM134	137.424913085743	-0.0471997754739688	0.455363219184916	-0.103653025728461	0.917444705809254	0.974225043078658
ADGRA3|ADGRA3	2069.88182238002	4.27253684263922	1.01957096045385	4.190524258103	2.78310656558481e-05	0.00216357461489971
MAP3K11|MAP3K11	928.7282732333	0.139147493283462	0.368393647095624	0.377714150014489	0.705642955007545	0.886824400416699
EFTUD2|EFTUD2	1669.95539513336	0.493443855276233	0.188845759373042	2.61294644324788	0.00897653676769192	0.101555623391674
GYPC|GYPC	1449.26309738544	-1.74751486627334	0.479601298395341	-3.64368251737477	0.000268764908565699	0.010847173803862
ACCS|ACCS	45.3592552168824	0.206883283408578	1.12666976332306	0.183623711351217	0.854308660436959	0.949523312849123
TMEM191A|TMEM191A	35.9057741503283	-0.169259855661943	0.62968821137278	-0.268799467109191	0.788084003441393	0.921746084517323
KDM4A-AS1|KDM4A-AS1	23.6153826100549	1.49908482363684	0.784900957919716	1.90990316486552	0.0561456825121766	0.275490269286504
PEAK1|PEAK1	407.78830469448	0.322718767104226	0.610558091893756	0.528563573866093	0.597108234794534	0.831906599576052
SPG11|SPG11	3676.93519002253	0.808179418127984	0.369547947483367	2.18694062199969	0.0287468589581594	0.191064119572921
GCNT1|GCNT1	219.174760906312	1.40852438694379	0.599685890903797	2.34877026174649	0.0188355243803948	0.153279466785865
CECR6|CECR6	34.2114334677204	1.01371248658324	0.804960762472893	1.25933155234678	0.207910601162935	0.524002104167409
ABCE1|ABCE1	2364.47315426985	0.012637680314016	0.267882893667846	0.0471761378301583	0.96237284559485	0.989034366779216
EWSR1|EWSR1	3479.61403171407	-0.0899825587949886	0.25295080103146	-0.355731464095254	0.722041679412594	0.893587222577136
PROK2|PROK2	87.2340736163591	0.190573742333968	0.909416835526592	0.209555986747944	0.834014234310943	0.941063516732083
ITIH2|ITIH2	30.162123812602	0.749475856899212	1.16460275693447	0.643546352983076	0.51986964761003	0.786452046008192
TELO2|TELO2	407.169335196972	0.838091964783377	0.599717734927707	1.39747737305852	0.162270066251105	0.464995908675777
DSG3|DSG3	5.92635460287885	4.98205907182026	3.02911033833179	1.6447268390243	0.100026155435284	0.365105383918007
DDX54|DDX54	1024.35279976925	0.0408818949249299	0.305813156948673	0.133682590156811	0.893653572622256	0.964468727419247
HSPA1L|HSPA1L	140.330058376658	0.487851807622481	0.483186222333986	1.0096558740147	0.312660190209615	0.634308579593104
CRTAM|CRTAM	55.8903513442214	0.365616082791616	0.977579412136569	0.374001414363398	0.708403263911207	0.887818273490833
LOC100507002|LOC100507002	7.87858492479748	2.59851743052045	1.7734764005357	1.46521116928059	0.142863313204751	0.436214797067535
VIPAS39|VIPAS39	366.046451118167	0.0262878984810943	0.298080820017303	0.0881905064524728	0.929725262670937	0.978815597904602
SEC24D|SEC24D	738.34641496158	0.473646112471382	0.316844028359517	1.49488729493726	0.134943858612714	0.425755230869755
DDN|DDN	10.3446454752238	2.51281555374852	1.58860690117321	1.5817730313854	0.113701393687617	0.39001490339259
MPP6|MPP6	437.397578421958	-1.85206513532803	0.541181513390638	-3.42226238240175	0.000621023528119154	0.0187648029593809
TRAF3IP3|TRAF3IP3	4215.98863921452	1.5728988785024	0.531862230880655	2.95734268608996	0.00310303042635964	0.053130724600882
AMMECR1L|AMMECR1L	571.053132755002	-0.110763952317164	0.274870243585445	-0.402968145523299	0.686971658503858	0.877720199526048
ZNF701|ZNF701	172.975344562156	0.0458001497186983	0.793354771030891	0.0577297211677258	0.953963919099929	0.987154323364892
OGG1|OGG1	192.079347482257	0.716409689645206	0.506960421214481	1.41314718006776	0.157612453347923	0.458057325200102
CCNI2|CCNI2	165.996690387849	1.02736285860227	0.77656297659157	1.32296142047808	0.185848207896767	0.496370557761827
TRO|TRO	19.0855697523454	-0.209895471777336	1.06508348153131	-0.197069502453987	0.843773148921882	0.94463235760141
HAX1|HAX1	969.564189360071	-0.0481781619537021	0.335362499716386	-0.143659956001181	0.885768993591738	0.962197241491266
EMC9|EMC9	82.09474393832	-0.378809644934493	0.385087474609843	-0.983697652898969	0.325264194201668	0.64470700726706
GAS5|GAS5	3864.21696037262	-1.0622760333216	0.436695649032083	-2.43253175449788	0.0149936767238657	0.134722131068335
MAPK11|MAPK11	252.310231775023	1.92839311010271	0.562698430604016	3.4270454744875	0.000610186875976024	0.018535783534987
MYSM1|MYSM1	1757.16067317479	0.131782381309178	0.352911920584895	0.373414366652082	0.708840068503443	0.887909432055968
KIAA0319|KIAA0319	11.1997556908239	2.81730372737314	1.8390877958385	1.53190279101854	0.125546424686845	0.412416502261656
ENTPD5|ENTPD5	80.0875948724246	1.1236870413563	0.582690526040671	1.92844570340221	0.0537997117084373	0.269340277004914
ZNF558|ZNF558	447.421598177573	0.70882374215018	0.269971450466363	2.62555074222004	0.00865089136489463	0.0992526998531459
CMBL|CMBL	4.84486258996192	-1.1472670377641	2.19144784770998	-0.523520118885315	0.600612354125037	0.834051854911308
BCAM|BCAM	10.0324546350308	2.56910587485114	4.50340217281642	0.57048111100511	0.568351429965703	0.815163875693059
FLJ23867|FLJ23867	62.2391954149379	-0.204533578372672	0.708479443104478	-0.2886937375013	0.772815755500544	0.915881556085962
FAM86C1|FAM86C1	71.8392091101636	0.990604755039851	0.435465791898501	2.27481646886914	0.0229169418722258	0.170846302027353
LINC01272|LINC01272	111.392681296278	0.547743584284743	0.939657412329915	0.582918388231082	0.559948241307954	0.810231392503233
PDE7A|PDE7A	2247.21236120255	-0.386240764244407	0.477299070297483	-0.809221698260751	0.418387636152871	0.721862080080388
C17orf67|C17orf67	63.3326811180623	0.302676241096143	0.475367064773577	0.636721101493035	0.524306526143046	0.788989653999262
WDTC1|WDTC1	971.481958133941	0.483769676412408	0.403613405718175	1.1985966510493	0.230684821028302	0.549191363072817
NHLRC1|NHLRC1	6.80741601188065	0.511708586024501	1.05040415236975	0.487154001505105	0.626149199944654	0.847121187546139
GNAO1|GNAO1	153.868890926079	0.673365064326556	0.920169972228441	0.731783349434692	0.464300813491672	0.751975676941617
TRPC5|TRPC5	32.1502434737051	0.539701243910983	0.935519410426126	0.576900102655434	0.5640069412455	0.81259603868133
BIN3-IT1|BIN3-IT1	45.4829333991105	0.336071615476633	0.788503933878352	0.426214253394557	0.669951732338056	0.869256800051995
TNFSF13|TNFSF13	445.900742220345	-0.0739361621569963	0.988838951952839	-0.0747706813237699	0.940397169413241	0.982284659582895
TNFRSF11A|TNFRSF11A	443.779041292285	2.40007394094219	1.70776883315861	1.40538572571506	0.159906609045103	0.461838204976823
SNORA71D|SNORA71D	245.523695998819	-1.48502579763467	0.654207404394336	-2.26996177001314	0.023209902707563	0.171904320617577
XAB2|XAB2	1352.79583171362	-0.39369777140097	0.44417677430031	-0.886353799162827	0.375426906938894	0.6879645068529
DAGLA|DAGLA	41.5989389712769	1.80609494405714	0.804500102580156	2.24499032164783	0.0247687538889114	0.176870473110634
TTC19|TTC19	981.631096448568	-0.16149586357843	0.391682040838808	-0.412313679821974	0.680109523144334	0.874770570264452
SNORD3A|SNORD3A	431341.278120299	-1.40496905093598	0.521346725781781	-2.69488419406332	0.00704130987291467	0.0886114663015496
LOC339666|LOC339666	24.8718331939986	-0.653651458737249	0.697621348849923	-0.936971696486696	0.348773117122515	0.665642661776499
ZNF624|ZNF624	277.614068113499	0.163152466706062	0.384899532913085	0.423883254602192	0.671650957027839	0.870305927035386
NSFL1C|NSFL1C	582.431257106098	-0.0190139556068977	0.244287029654924	-0.0778344868892813	0.937959713081675	0.981491422556153
CWC25|CWC25	643.006841117432	-0.120822843065059	0.436250583798978	-0.276957435822558	0.78181278940582	0.919412271181109
CDADC1|CDADC1	150.092192440878	-0.245162115542087	0.475111230567298	-0.516009935714119	0.605847469829214	0.836622069370128
ELP5|ELP5	282.140903270691	-0.0891643825772643	0.338717532069838	-0.26324112021128	0.792364738751943	0.923235791698961
CACHD1|CACHD1	18.440421714478	-2.6063039915092	0.863613080672533	-3.01790703480262	0.00254526972828063	0.0471800703596166
ZNF692|ZNF692	234.323663118496	1.03335254778346	0.531765644756393	1.94324804163844	0.0519861960198983	0.263940488652448
PANX1|PANX1	482.200896615051	0.943529240646704	0.283508066933244	3.32805077066421	0.000874559266324557	0.0234692877884504
LOC101927045|LOC101927045	39.1461373702667	1.57719506103739	0.727419255809253	2.16820636578112	0.0301429886971695	0.196863467114796
MYO1F|MYO1F	4222.93771335519	0.422695609708785	0.604085488406538	0.699728130903748	0.484097104990105	0.765161168076204
FMOD|FMOD	25.8176747676931	1.90041913950253	1.73751965661252	1.09375403741193	0.274062867394769	0.595273190338696
ZRANB1|ZRANB1	1918.47072665729	-0.675159552611777	0.311489346604883	-2.1675205266914	0.030195186259556	0.197128955955312
PARG|PARG	932.866371622452	0.0511111193714172	0.268859820741543	0.190103226396743	0.849228241886536	0.948026579402409
GHRLOS|GHRLOS	106.99142915875	0.88212136483156	0.568226696245759	1.55241098431257	0.120563916851759	0.40231962245763
ZNF473|ZNF473	166.471393596921	0.83591558708856	0.49213189659739	1.69856006665713	0.0894021060023316	0.346527654413258
FAM133DP|FAM133DP	376.73154711026	-0.0430750332544948	0.543896231329262	-0.0791971533783586	0.936875808757419	0.981308289288094
DSN1|DSN1	303.200133838755	0.0404383683252366	0.404029355881184	0.10008769842241	0.920274701526956	0.975433073962306
MANF|MANF	342.336574493812	0.0650999940167933	0.45903459844746	0.14181936228113	0.887222689764138	0.962197241491266
AHI1|AHI1	672.883326162521	1.34356983790619	0.675209903318635	1.98985505292885	0.0466069048545562	0.248812382475182
SCARNA5|SCARNA5	26649.0493159063	-1.59503179936792	0.715810483429889	-2.22828784474507	0.0258613263842272	0.180058957598502
CCR6|CCR6	272.054324309953	-2.47617238925617	0.784465134034423	-3.1565104449212	0.00159669168741525	0.0349384218761932
CAV2|CAV2	20.5097854394784	6.02978464285173	1.90907989019875	3.15847685254491	0.00158595903591103	0.034764985583061
MED7|MED7	252.286367807186	-0.083753680726664	0.328038954416005	-0.255316265337351	0.798478838226884	0.92530754318554
KLF10|KLF10	2051.10327322268	-0.836772434930177	0.853406067258192	-0.980509123421801	0.326834868366241	0.645885347666116
AP1AR|AP1AR	376.937509359212	0.807911793184552	0.44828696661751	1.80222012538206	0.0715107795355627	0.31119538355083
RQCD1|RQCD1	1536.48824577388	-0.356577595039863	0.294923537453562	-1.20905099036393	0.226643256263976	0.544963148642559
MIR5189|MIR5189	5.48476756833982	1.34280647261679	1.73241676118617	0.775105911407476	0.438277078814952	0.734056877782006
CHD7|CHD7	1822.52443701462	0.150228103932045	0.630123245709383	0.238410668000227	0.811562594082037	0.930951322718671
CFAP44|CFAP44	395.410736625217	0.606613034724347	0.51776101848115	1.17160816104666	0.241354410014498	0.561668823305276
GAL3ST4|GAL3ST4	51.7806806965168	-0.230688275451726	0.908646024047009	-0.253881345811943	0.799587226616458	0.925963446804787
REXO2|REXO2	431.743919687819	0.63731330625059	0.478677489437789	1.33140438042975	0.183055988854025	0.492996236923769
LOC100289580|LOC100289580	37.4231622625782	0.214444246013094	0.612806447056748	0.349937973144784	0.726385248111361	0.895399920275467
PEAR1|PEAR1	40.8935615037128	7.66021625420323	1.79332584055289	4.27151389947158	1.94150423719124e-05	0.00165202733810383
AUTS2|AUTS2	148.090480327675	-1.53072115259505	1.05486877607848	-1.4511010158871	0.146751733696265	0.441926172548392
MGA|MGA	3459.40581744425	0.308503463474933	0.325338868438704	0.948252709414761	0.343000819433521	0.660542581993127
MIR6802|MIR6802	4.81676610939116	0.244031911567547	0.950476754176558	0.256746848878974	0.797374203274393	0.925032100998943
CASC4|CASC4	2884.26884014773	-0.231508860093683	0.331627632131516	-0.698098824291793	0.485115393309122	0.765673435976572
CTRL|CTRL	135.945015876786	-0.0145629317556795	0.609367180945786	-0.0238984510670178	0.980933609800653	0.995800751745861
NSMAF|NSMAF	1205.73750944117	0.630522158943851	0.312631936841954	2.01681941171161	0.0437143624306714	0.240369506231923
LOC100505715|LOC100505715	6.24959450543173	4.1960042174909	1.45471570317832	2.88441529044011	0.00392141242648821	0.0613061840155739
SLCO5A1|SLCO5A1	68.5076489830291	4.45946428741883	1.75490590438381	2.54114153714963	0.0110491180967422	0.114045069013049
MIR635|MIR635	13.4432115572798	0.395343508798957	1.03267563791121	0.382834158457168	0.701842732632162	0.88489383896092
MAGI1|MAGI1	1373.65830884952	9.49065476664461	1.44045675531525	6.58864261743665	4.43865763111188e-11	2.61299183028766e-08
DNAJC19|DNAJC19	338.352458797565	-0.3262957732604	0.334678573826407	-0.974952682300018	0.329583731853245	0.647635067932619
EDIL3|EDIL3	5.02333815690912	1.76078697085704	2.33104264036212	0.755364548193553	0.450030278645239	0.741165050842323
RBMS2|RBMS2	275.704102551806	-0.470932675203818	0.62318739463033	-0.755683891011903	0.449838744630837	0.741064078774259
ROGDI|ROGDI	167.839674709957	-1.154157163487	0.66826563667931	-1.72709338942241	0.084150892640513	0.335816745946432
RHBDL2|RHBDL2	15.236678177842	3.92887901521704	1.73574645798635	2.26350974080337	0.0236042848322971	0.173098088770179
GLTPD2|GLTPD2	18.0658627882204	-0.189246081239865	0.939353882567339	-0.201464096494325	0.840335700685809	0.94278000232693
LOC101928489|LOC101928489	11.2339745205899	-2.0155086327171	1.65579055121077	-1.21724854103274	0.223509666609411	0.542282815408081
RPA2|RPA2	858.782204961032	-0.188922937943294	0.361074580289431	-0.523224143310937	0.600818282081729	0.834051854911308
SNORA54|SNORA54	3103.67678416633	-2.23971263665781	0.75774101733909	-2.95577589889863	0.00311883612329942	0.0531915787182494
RNA5S1|RNA5S1	13.0442096584514	-1.43940448468895	0.632033074746251	-2.27741955635288	0.0227611833712163	0.170200290635433
ATP6AP1|ATP6AP1	860.840506278849	-0.166791200363139	0.465781758682973	-0.358088734163295	0.720276909652137	0.893061762043814
CASK|CASK	1385.12652932443	1.08360398311306	0.630354311277264	1.71903953653842	0.0856071730889983	0.338203602700951
PCSK1|PCSK1	7.25989651478593	3.76369041914505	1.7268084605738	2.17956450010351	0.0292897586669602	0.193083440640514
FUT9|FUT9	6.71004501458086	3.50461842384434	2.74718980286775	1.27571033504344	0.202057933807401	0.516861409343715
SV2B|SV2B	5.29604678690055	2.35271607428915	2.76473468633822	0.850973544013086	0.394784049175944	0.704773950384995
DBNL|DBNL	2091.33238237667	0.328669035103182	0.332746026808447	0.987747436853357	0.323276356043909	0.642718138101399
POLA2|POLA2	318.992507028836	0.304417858087061	0.303150191596012	1.00418164502676	0.315291067634605	0.636276805336
SNRPE|SNRPE	679.669318586747	-0.683885736414794	0.387335323519873	-1.76561675346324	0.0774601673821689	0.322405955606377
SLC22A13|SLC22A13	7.52079858873752	5.12026518344469	1.42945950445262	3.58195889250139	0.000341027463458185	0.0127709630152032
FAM172BP|FAM172BP	441.668537898785	2.13999841143308	0.902413536978391	2.37141656650961	0.0177200469170441	0.148339600111281
ERI2|ERI2	82.2240021540959	0.913403620945395	0.744762490326682	1.22643612266877	0.220034599506422	0.537692347010824
MIR933|MIR933	5.05907171677128	-0.423485244877473	0.916752254048869	-0.461940772991978	0.644123793847978	0.857158111199056
SEC22C|SEC22C	1448.58888085718	-0.181911775451342	0.339624897284912	-0.535625558978781	0.592217360727597	0.828919798503037
HEATR1|HEATR1	2033.76662803449	0.454490348295012	0.356871587575671	1.2735402988579	0.202826381919569	0.517973372046504
GATM|GATM	23.5292351643075	0.943992652433413	1.21894935818057	0.774431395445695	0.438675723595718	0.734222740512363
ARSG|ARSG	815.513666254142	0.62854537462196	0.508160844375679	1.23690241304244	0.21612331410764	0.534378229403059
CDCA3|CDCA3	91.1991944417026	-0.931599021053033	0.790342673655621	-1.17872797725074	0.238506511474802	0.558368664403523
KIAA0196|KIAA0196	1352.88305334344	0.834878975390331	0.214562776831025	3.89107089179697	9.98027658800115e-05	0.0055140220682963
C2orf66|C2orf66	4.63984041593288	-0.176154159979165	2.21454658912502	-0.0795441201572393	0.936599839953335	0.981200447474397
CDKN2A|CDKN2A	114.840495311757	2.04265224572994	1.546933415351	1.3204525970282	0.186683952703937	0.497901646705454
C19orf70|C19orf70	263.75552950255	-0.481241353037474	0.393004353058239	-1.2245191415632	0.220756449893662	0.538272106547299
EDC4|EDC4	1744.06770166471	0.466784119915225	0.349384407361943	1.33601875206658	0.181543144178973	0.490706864696552
STAP1|STAP1	52.6916785241881	0.461580457417894	0.966354721561775	0.477651163820993	0.632898508693261	0.850958290033289
OLFM2|OLFM2	40.2116707461711	-0.524290449817423	0.903306998221567	-0.58041225281067	0.561636644279898	0.811028313753152
ERCC8|ERCC8	241.791078140605	0.166658142769032	0.358396695282651	0.465010266452364	0.641924104572903	0.856233167690335
RPS6KA5|RPS6KA5	359.78368846456	-0.260743248719516	0.459921728367209	-0.566929615709163	0.570762002105079	0.816837027406983
PDZK1|PDZK1	37.9305438339237	1.00911102242013	0.911458701916253	1.10713850259872	0.268234051083994	0.590038876447099
FRMPD4|FRMPD4	486.419074256202	7.57335581796925	1.61720516635653	4.68299012118023	2.82720143782381e-06	0.000383063356718477
ARSB|ARSB	361.988634175051	-0.0264906623432389	0.518654390488246	-0.0510757506907469	0.959265158911306	0.988565422729314
GORASP1|GORASP1	618.390720950143	0.570049291252736	0.276920921698632	2.05852735053768	0.0395395385656571	0.228314722771927
GPATCH2|GPATCH2	621.91623571543	0.142525767379997	0.420711440413764	0.338773215294133	0.73478058045974	0.899111462691633
B4GAT1|B4GAT1	74.26017546096	0.218328933239062	0.553265261866911	0.394618907578516	0.693124157480229	0.880407203092395
GEMIN2|GEMIN2	183.413274994707	-0.191862660721204	0.472035589598677	-0.406458040344638	0.684406081316001	0.877065980607328
LGALS1|LGALS1	2226.47302968064	-0.487855653255483	0.624996560249463	-0.780573341172884	0.435053476257076	0.732396503960241
SDK1|SDK1	13.1173956061127	-2.66021952724192	2.03460978212405	-1.30748389721432	0.191048420292268	0.503934894528716
AKAP11|AKAP11	2696.609704873	0.339248674512415	0.402830421091791	0.842162500024079	0.39969700104407	0.708571415464479
ADCY5|ADCY5	14.80165319177	2.41529345543706	1.01487964897523	2.37988165185486	0.0173181990632538	0.146727689532441
SLC35D2|SLC35D2	465.130244669907	0.0424998397911914	0.543972392012932	0.0781286705266855	0.937725701111222	0.981491422556153
GATA6|GATA6	39.8217682031601	-0.829056777337925	1.87613240046829	-0.44189673241131	0.658563935285714	0.863875458322282
CTDSP2|CTDSP2	4122.55394299821	-0.10677144974597	0.301030018541496	-0.354687051687678	0.722824052339932	0.893882812136712
OLFML3|OLFML3	7.25678003796428	1.82269181339241	1.45336436088262	1.25411896868415	0.209798766715148	0.526837491346943
AATF|AATF	1208.37667043762	0.0750415465811698	0.172801359229887	0.434264793492381	0.66409616667075	0.866446294031566
ZNF202|ZNF202	300.918758849297	0.282150857820158	0.344425304282491	0.819193172835941	0.41267620945992	0.71816597837918
SERINC1|SERINC1	7136.07748647627	-0.723672279841589	0.312928220895726	-2.31258234802265	0.0207456129698149	0.162239626486798
C11orf45|C11orf45	5.23082566805647	3.64158490081336	2.01321760582511	1.80883819527342	0.0704761444735419	0.308155475752074
PRF1|PRF1	1517.51247649741	2.00406914416507	0.703310667668526	2.8494792362649	0.00437908639943435	0.065473285123407
RNU105B|RNU105B	4.54336015540725	-0.728291151131976	1.43816522665823	-0.506402976259034	0.612573785637037	0.839786370223681
SMCHD1|SMCHD1	12159.6761283344	-0.541112811043219	0.415617961984757	-1.30194760702634	0.192934296571718	0.506090960446858
NDUFAF3|NDUFAF3	480.104079762257	0.254728056024396	0.384075659505264	0.663223637635658	0.507187334773496	0.778992992377058
ZFP69B|ZFP69B	76.8012948341726	0.266108989226143	0.588302328218006	0.452333734650004	0.651028576858679	0.860950935131596
CCDC80|CCDC80	18.0327461681212	5.12778684267399	1.81247344798231	2.82916522081047	0.00466695987048143	0.0676352622316291
CCDC88A|CCDC88A	1279.32428484987	-0.0664408387263558	0.683491353772398	-0.0972080163994005	0.922561202031284	0.976345426917143
RNF123|RNF123	754.551944474509	1.15330017020249	0.362645382692327	3.18024225660957	0.00147151977646887	0.0331837834330322
PDS5B|PDS5B	1686.9052663618	0.184061348210017	0.452540518262474	0.406728990625456	0.684207045489773	0.876935636681787
ARHGAP11B|ARHGAP11B	115.702466655409	0.283800764080478	0.451890047873849	0.628030569417862	0.529983914474076	0.792214813755487
MIR663A|MIR663A	285.113072310813	-1.22227034754664	0.866266648665802	-1.41096318255949	0.158255470322751	0.459010769512404
RAD51C|RAD51C	165.714500090557	0.333598762718198	0.542797718691702	0.614591313173288	0.538824652662115	0.797711981333559
LOC101927851|LOC101927851	5.13921484644439	3.68343560838932	1.87400067963106	1.96554657019361	0.0493510111483937	0.256709464450145
CCT6B|CCT6B	50.6601946182677	-0.0777800199824941	0.793282838603765	-0.098048282652115	0.921893954025508	0.975975045462203
UBE2D2|UBE2D2	2494.59678412055	-0.145559517807415	0.305105863727707	-0.477078729425273	0.633306060528208	0.850987883930544
TIPRL|TIPRL	1233.23612660061	0.742216374713147	0.353528108048051	2.09945505835781	0.0357768055487733	0.21643572796905
COL4A6|COL4A6	4.39853663547671	3.19874682281417	1.96183191141769	1.6304897500126	0.102998029788874	0.369425934310098
KCTD9|KCTD9	726.549146089467	0.329611776442726	0.402516171007961	0.818878346222286	0.412855825401362	0.718376074195607
C2orf88|C2orf88	479.323507367051	4.47185485444771	0.950424783139048	4.70511179188545	2.53726881456922e-06	0.000349324622599401
ST3GAL3|ST3GAL3	135.436282042177	-0.181913698267253	0.395471174710758	-0.459992307657573	0.645521741924489	0.857786675981766
GNAQ|GNAQ	1362.71366542946	-0.65315474552508	0.747781812906185	-0.873456313395286	0.38241440820121	0.693776704561598
CXCR2|CXCR2	30.4989697874719	3.06751926224326	1.23799404362406	2.4778142334704	0.0132189949997232	0.126004847925893
ZNRF3|ZNRF3	29.4420897726871	-0.223621932257259	0.825084544741225	-0.271029112934596	0.786368641087278	0.921211858827506
SIRPG|SIRPG	1096.37425723718	1.95390599421362	0.659653328672664	2.96201945671253	0.00305628470126683	0.0530252971748246
SLC37A4|SLC37A4	123.338976340126	0.207747111531381	0.371382369326001	0.559388728949113	0.575896451877683	0.820197232539902
ZDHHC14|ZDHHC14	47.6917679336262	-0.61501925612756	1.1257424845489	-0.546323217404386	0.584843779491538	0.825707327446207
MIR3175|MIR3175	8.94775113493005	-1.40482792343845	0.844715886873905	-1.66307742670425	0.0962969377955338	0.358471176899395
SLC12A2|SLC12A2	1028.46940516031	0.402300287620489	0.308654434937933	1.30340031466383	0.192438129149373	0.50573033233472
SCAF1|SCAF1	550.03891412805	-0.0336535319853252	0.488641973882384	-0.0688715537839277	0.945091861530393	0.983976791470141
GATA1|GATA1	11.725573149799	0.864783800440273	1.40887404952126	0.613812001671923	0.53933956549661	0.79816271343257
DDX46|DDX46	1797.60849129118	0.0579541206466387	0.242297413064534	0.239185882810903	0.810961448894724	0.930550736357758
KLF1|KLF1	5.3909244402328	-0.857063304752295	1.87197245094427	-0.457839699681461	0.64706761162498	0.858332421574333
LCK|LCK	6074.84275235861	0.413313409435104	0.422888243918996	0.977358475621927	0.328391712872968	0.64680099255819
KMO|KMO	115.805442106465	2.16779777348187	0.875429557808679	2.47626751249772	0.0132764059974877	0.126390185191179
TMOD2|TMOD2	414.701925583266	0.226905498152418	0.67436776282573	0.336471448756151	0.73651537835606	0.899825842918842
LOC100507250|LOC100507250	22.7745136060951	0.418465213677493	0.774176112645432	0.540529741026959	0.588831756212065	0.826756784443818
DLAT|DLAT	720.593828953348	-0.438246050735914	0.256605093077786	-1.7078618568302	0.0876619781590544	0.342463453348141
MIR641|MIR641	6.27056589548579	-0.0547985883610978	0.858295044894323	-0.0638458635955947	0.949092958860032	0.985698212119165
OR2A7|OR2A7	20.5399215147613	0.63070510036709	0.930906365361528	0.677517228193137	0.498077842967242	0.773414418414012
LOC389834|LOC389834	217.903431322984	-0.515333960203126	1.25959458797929	-0.409126845352561	0.682446576353157	0.876060452026551
LRRK2|LRRK2	2039.26644085338	0.98567996205213	1.07847522217428	0.91395698462588	0.360739448819213	0.675945985099506
LOC101928020|LOC101928020	66.9572245114517	0.229050244416252	0.66629244207602	0.343768336471868	0.731020514389274	0.897840447600985
KLF3|KLF3	2616.14785924293	-1.24392090677305	0.568085928740356	-2.18967033654794	0.0285481538792431	0.190380501182202
DLSTP1|DLSTP1	61.7763125221925	0.0284399758793208	0.490326318184358	0.058002140257598	0.953746923719836	0.987140509097622
G2E3|G2E3	789.963689500228	-0.0553491262348323	0.434223714942046	-0.127466843311908	0.898570914287468	0.966403649807729
NFYC|NFYC	616.761041523891	0.0143970700990095	0.192290827988679	0.074871330315646	0.940317087606906	0.982261109932393
CX3CL1|CX3CL1	7.30310523519194	2.75266293455722	2.68907431813335	1.02364702827105	0.306002023846852	0.628119099568769
ZNF678|ZNF678	538.395368544408	0.98550966213188	0.556608494137526	1.77056166499748	0.0766336214900264	0.32049200933112
MED12L|MED12L	166.83933877474	1.85123212891958	1.21689814528387	1.52127122232382	0.128191788815624	0.416300212794432
SNORD1C|SNORD1C	6.83040399959014	0.505631012616559	0.822758460136794	0.614555835174873	0.538848088609337	0.797711981333559
B4GALNT1|B4GALNT1	20.6820694783795	2.42794794669278	2.58677043349944	0.93860201711375	0.347935116772818	0.665029201438559
PC|PC	93.9006891592777	-0.02532405992022	0.615123087044965	-0.0411690935579676	0.967161092542425	0.991376413802719
TBC1D10A|TBC1D10A	409.99038770097	-0.877915385023847	0.351098695412873	-2.50048033927174	0.012402501696544	0.122031365621333
PPP1R9B|PPP1R9B	2602.5200582602	0.526898441885766	0.511157634283019	1.03079442924652	0.302637231193084	0.624969494487519
ACSL3|ACSL3	687.949961980219	-0.57151939401537	0.45143370628521	-1.26600957362783	0.205509654734826	0.521394089111748
DSG1|DSG1	7.43289271896699	3.42228711564837	2.73588562669114	1.25088822510003	0.210975260430251	0.528535549032903
ARHGEF1|ARHGEF1	6249.79018150997	-0.433654122681508	0.502313416640411	-0.863313836174012	0.387964938899515	0.698710798633543
C1orf159|C1orf159	80.05894969497	0.509821291617759	0.475647329761965	1.07184726943153	0.283788637720683	0.606379232697262
ADAM11|ADAM11	6.86866982714198	3.41961611446535	1.46959447031292	2.32691139191427	0.0199699817649261	0.158349990102563
GPR137B|GPR137B	276.434582148404	0.828597420685156	0.416132005002408	1.99118887930853	0.0464601259966675	0.248408165053275
ZCCHC2|ZCCHC2	1687.36903758467	0.366088288726884	0.396917858334559	0.922327582495197	0.356357730864899	0.671939383844219
SPAG16|SPAG16	133.285072274348	0.021848790970295	0.583263163047336	0.0374595763191063	0.970118570933254	0.991859905626823
MYCL|MYCL	108.015426300644	0.742885079971531	0.793740269613785	0.935929684319785	0.349309392392557	0.665642661776499
TRIM27|TRIM27	664.24550710564	0.492945792483424	0.376080447221912	1.31074560276875	0.189943726170011	0.502202151645413
RASAL1|RASAL1	15.1357060269324	0.595146647150745	1.72041911951088	0.345931198044315	0.729394421817672	0.896746476254595
SEMA3B|SEMA3B	10.5714141258202	0.129662426369812	0.970218043379936	0.13364256339545	0.89368522534177	0.964468727419247
LMO7|LMO7	355.161963958705	-1.21161235982366	0.550789166079436	-2.19977522152083	0.0278228468207781	0.187743731590642
CARD16|CARD16	565.952621948012	0.646220691145738	0.498616477545347	1.29602754872249	0.194965993938284	0.5085499539365
HCG8|HCG8	18.3860046326682	1.86965570239541	1.12831778261492	1.65702936814699	0.0975135376984891	0.360647988645712
MYO15A|MYO15A	27.311701665899	0.0537758816581759	0.898714016714925	0.0598364781877367	0.952285872221949	0.986910362565053
MYH15|MYH15	12.2811823475265	3.76450503475772	1.7646412391058	2.13329766489267	0.0329003156597572	0.207489541538004
PTMA|PTMA	16073.3808819544	-0.80512570593632	0.400729404464488	-2.00915055637668	0.0445211694428629	0.243099474102987
NT5DC3|NT5DC3	208.730308958261	-0.0897583391486908	0.47847266773337	-0.187593451416767	0.851195360120579	0.948412979185417
CLTB|CLTB	656.091111860111	-0.36489392028562	0.342269703625831	-1.06610055292689	0.286378189704067	0.608786791120598
IRAIN|IRAIN	23.1792717384311	-3.30490644346702	0.852791777766179	-3.87539670249162	0.000106451131494826	0.00575105606607489
NCK1|NCK1	996.170733462654	-0.677115652041252	0.295934866857378	-2.28805635250671	0.022134239624693	0.167876568160865
MST1P2|MST1P2	33.0182031483511	0.7028997200953	0.763826312583768	0.920235017457865	0.357449958821474	0.672884077296306
HDHD3|HDHD3	206.470218362829	0.370184891066208	0.416345561224019	0.889128948505895	0.373933782640784	0.686725208395382
CD24|CD24	80.5241867459193	2.70300919275616	1.15486200525972	2.3405473385093	0.0192554971703645	0.154824299199256
EPHX1|EPHX1	118.862513758313	0.186014872970227	0.485996351656873	0.382749525456436	0.701905489506304	0.88489383896092
NKX3-1|NKX3-1	45.5142765085485	-1.47935828532324	0.956215977503825	-1.54709638839654	0.121840004707033	0.405310319633372
STX11|STX11	1716.50928555198	-0.621116388697654	0.56894636088997	-1.09169586343092	0.274966803994297	0.596102669549704
UBE2L6|UBE2L6	1537.59052408366	0.334377218413686	0.385892235117126	0.866504137644014	0.38621375831583	0.697069318999939
PGAP2|PGAP2	240.588183429595	-0.211333110449606	0.293268562756446	-0.720612903283172	0.471147712737344	0.755229838503762
ATAD3C|ATAD3C	70.0474631460503	1.18065327757532	1.0173988080819	1.16046261131483	0.245860507781908	0.566900403680813
THAP2|THAP2	156.495961256284	0.839108538943769	0.448836559177002	1.86951914185061	0.0615506230350118	0.288679185838934
LST1|LST1	777.752345350331	-0.790806166417752	0.772289210869077	-1.02397671142892	0.305846274908589	0.627874892404934
LOC100132741|LOC100132741	40.9417314943358	3.87755210483161	2.82889832966434	1.37069334170511	0.170470571296765	0.476959149497838
ERCC2|ERCC2	154.076530608506	0.0757938787449747	0.401245781874019	0.188896387623016	0.850174024868296	0.948266755034075
SNORA25|SNORA25	139.468350933957	-0.843355734735061	0.562305209274474	-1.49981846304291	0.133661433400962	0.423704398523208
ANK3|ANK3	598.953063708376	-2.34097285982408	0.909443144086516	-2.57407279943317	0.0100509122583824	0.107849889424956
TMX2|TMX2	591.34860837369	0.320516855669703	0.267737670820095	1.1971302158861	0.23125580432654	0.54964457418478
TTC1|TTC1	749.677808595725	-0.106061547443331	0.32959751296004	-0.321791103612453	0.747610954419342	0.905476456127067
KDM4A|KDM4A	1055.38696929402	0.31298299083283	0.239733805384983	1.30554383154356	0.191707732130494	0.504599815438144
JADE2|JADE2	2649.22252136596	-0.36898447269404	0.286948945521561	-1.28588893060182	0.198481827435063	0.512242140282901
CERS6|CERS6	1612.37908022309	-0.783531392213889	0.483289063005631	-1.6212479283951	0.104964477584824	0.372315304659902
NAT1|NAT1	120.655354014201	0.455679804312423	0.571371107707698	0.797519857349069	0.425149174925096	0.725837113546937
GPR25|GPR25	30.2051139174951	-0.402936467039763	1.79558831945813	-0.224403591108991	0.822443276639697	0.935681433156873
ITPR2|ITPR2	2503.31287510668	0.448623479842606	0.426979159197936	1.05069174965197	0.293400186470337	0.615261731655362
LY6G6E|LY6G6E	7.67824534855659	5.1083310964823	2.06435958004816	2.47453551496253	0.0133409555785536	0.126670476863598
ZNF8|ZNF8	344.176545092323	-0.689156904820977	0.409908103916477	-1.68124732894132	0.0927148839084894	0.351271304501938
FAM53A|FAM53A	15.9543345036435	-0.498683234358036	1.19969156206851	-0.415676203888777	0.677646956263642	0.874105692280537
ZNF501|ZNF501	38.2753445589907	0.24104326025488	1.03618092518023	0.232626614133968	0.816051359104989	0.932801033578103
EIF1AY|EIF1AY	318.298817332116	-0.0583055418999641	2.69499624400019	-0.0216347395770099	0.982739321836148	0.996574143295915
NADK2|NADK2	366.171561153479	-0.0385543933490242	0.315732272692753	-0.122111031033379	0.902811085758668	0.967775389681776
COX15|COX15	775.104186167771	0.5890650604327	0.323859600257606	1.81889022268953	0.0689281798038392	0.304934409331729
PLGLA|PLGLA	4.72840025504761	-0.747391537268298	1.20449883199375	-0.62050000997608	0.534928647443256	0.795288850400702
CD7|CD7	364.347904345567	-1.79861948481534	1.04901787097675	-1.71457468416684	0.0864232334851654	0.34034239218738
TNIP2|TNIP2	868.797695173563	0.72169285054373	0.419841394541442	1.71896544725414	0.0856206637109601	0.338203602700951
TARDBP|TARDBP	1442.07952099415	0.109333709250364	0.304460261008399	0.35910666596764	0.719515295047526	0.892830725181812
EIF2D|EIF2D	933.07208460353	-0.976984890616157	0.286059315632969	-3.41532275729026	0.000637064750530863	0.0190472319107932
PAPPA|PAPPA	33.1707321146862	0.598419977372461	1.20046909672694	0.498488448394086	0.618139809165269	0.842637044488701
PLA1A|PLA1A	9.70507028502647	2.84829930016744	2.08140131801195	1.36845272246104	0.171170410948832	0.477877556127304
UHRF1BP1|UHRF1BP1	912.104235058153	0.157443395565422	0.413740187183345	0.380536869375109	0.703546933516829	0.885698196961825
TNIK|TNIK	2790.30913106531	0.329676370113581	0.42015065246155	0.784662282879	0.432651602313363	0.730586365449429
TUBGCP3|TUBGCP3	552.963418197834	0.198370622432566	0.290888642376143	0.681946949912389	0.495272496312743	0.772807975235458
DCTN3|DCTN3	543.983504787936	-0.536596640832379	0.334962420916571	-1.60196071954599	0.109164295949261	0.38123208750032
CCNT1|CCNT1	2577.19181550814	-0.648832425282967	0.413547490740798	-1.56894296256204	0.116661229931483	0.39548064284954
TMIE|TMIE	9.65366832408745	2.33822431741494	2.40689481792401	0.971469255740763	0.33131465569461	0.649004285063372
FAR2P1|FAR2P1	6.38664581504776	2.75229400853562	2.03186006732425	1.35456867960405	0.175555017932974	0.483630782838382
ERP44|ERP44	1472.8051729145	-0.243432867104003	0.226938730295816	-1.07268101300596	0.283414262204447	0.606218253727611
ACAN|ACAN	35.8624885395864	4.19630955470324	0.945630918298838	4.43757651479107	9.09773866483409e-06	0.000941312693854834
CACNG8|CACNG8	4.56287481558557	3.13112223320114	2.1708284124549	1.44236283956699	0.149200041266816	0.445382602641561
NSFP1|NSFP1	153.310973942815	0.414840012022095	0.707347479594813	0.586472736510953	0.557557877507528	0.80972693327029
ZCCHC7|ZCCHC7	1101.25633599046	-0.0881586001585988	0.372974605746265	-0.236366226548338	0.813148501059329	0.931554461509017
MAT2A|MAT2A	1538.42990522642	1.2572606247345	0.392736930902485	3.20127934453577	0.00136818820673174	0.0315644717098976
MORC1|MORC1	8.56482757393982	5.735330630851	2.53066215615684	2.26633595357544	0.023430821693334	0.172593584279946
OGFOD3|OGFOD3	220.736173247716	-0.161443304792045	0.372650611654675	-0.433229678800715	0.664847919654882	0.866698509800561
NYAP1|NYAP1	5.43001348806839	1.67417144551382	1.69020022603811	0.990516638042427	0.321921660896025	0.641588442075291
ASAP1-IT2|ASAP1-IT2	22.1654167318282	1.25683960475586	0.90321058518853	1.39152444110641	0.164066453412726	0.467291039816826
RBM14|RBM14	988.971707675985	-0.441856089601243	0.384660620430775	-1.14869073186232	0.250683528878274	0.572841772111754
LOC101929586|LOC101929586	10.9430994968194	3.90647580649585	1.85243774998857	2.10882973342556	0.0349592811256841	0.213685946071492
A4GALT|A4GALT	5.05943777761756	-6.24533275546658	2.77313573425052	-2.25208332875003	0.0243170066194835	0.1756091104094
VPS18|VPS18	701.894666007497	-0.263252122172533	0.346677584990335	-0.759357205571488	0.447638905750571	0.739783747752291
LYSMD4|LYSMD4	153.812362776841	0.424608248304103	0.463177903146111	0.916728206203219	0.359285081770927	0.674776118371096
PPP1R10|PPP1R10	1118.65531886884	-0.109650704774998	0.30260419132854	-0.362356860602598	0.717085372352302	0.891661329413877
CEP83|CEP83	232.48146885565	0.435217384469238	0.446893845469118	0.973871958367151	0.330120118557262	0.648262704461914
ABHD3|ABHD3	822.076672904296	1.34502636096773	0.350039664838322	3.84249699698739	0.000121788904727858	0.00633736669973285
RFC2|RFC2	364.257674334398	0.521352906569655	0.372536909090328	1.39946645244551	0.161673151593791	0.463957647337234
AGBL2|AGBL2	53.2815829846256	1.92541023998021	0.920079012657546	2.09265749298952	0.0363797403207005	0.217997517288522
KLLN|KLLN	29.5483184779677	-0.0388523133026228	0.533691051226527	-0.0727992594467014	0.941965860270733	0.982598676831725
BPHL|BPHL	67.6709583020996	1.37931311188087	0.556301893321774	2.47943271169681	0.0131591556378541	0.125597628003441
TTF1|TTF1	617.569507829528	-0.168925267008952	0.403792232708014	-0.418346994631528	0.67569343474327	0.87323530037374
DDX60L|DDX60L	2627.3302247864	1.59977087838599	0.574806603412467	2.7831463119745	0.00538345228902741	0.0741769302191249
SCAF4|SCAF4	755.847698973986	-0.0947635359190063	0.304297623395871	-0.311417272542169	0.755483424698455	0.909050819456726
UPF1|UPF1	1967.38615159815	-0.0499759929889115	0.333258746288766	-0.149961534529713	0.880794963013022	0.96067544238208
RAPGEF2|RAPGEF2	1166.3520923291	-0.215949176157507	0.372328788956787	-0.579995913726056	0.561917373419632	0.811114686650879
PLEKHA6|PLEKHA6	9.94501880046029	0.0776863318485374	1.46120151895166	0.05316606288794	0.957599595247774	0.988025466114428
LRRC16A|LRRC16A	126.678221800971	-0.463492141909244	0.836535597984313	-0.554061468544863	0.579536778919153	0.822868904127697
OXSM|OXSM	122.039744534432	-0.250450290798047	0.523894929636046	-0.478054427768631	0.632611466764201	0.850958290033289
UEVLD|UEVLD	205.14224011808	0.738341898043575	0.642426042874188	1.14930256366984	0.250431241349449	0.572644274352772
HBB|HBB	2228.45505096902	4.93314444486951	1.72628151587146	2.85767089522427	0.00426762760052905	0.0643696916472566
ZC3H12C|ZC3H12C	243.608675254143	1.95448519358647	0.780279564058653	2.50485247033787	0.0122502478607989	0.121239060423193
WDR48|WDR48	2071.18772332824	-0.613558226178034	0.355366842116415	-1.72654888825288	0.084248712061834	0.335987273671327
HAGLROS|HAGLROS	8.73071784019209	0	2.2213928247285	0	1	1
DHRS3|DHRS3	1455.12260921213	-0.522777159257539	0.692010490830564	-0.755446869931252	0.449980899658948	0.741155226143518
CLEC3B|CLEC3B	10.3407026551528	3.828543473885	1.50992086944884	2.53559213025681	0.0112257395703934	0.114826738134066
POLD2|POLD2	475.037352727379	1.00292245764705	0.463304036348006	2.16471772090006	0.0304093091467378	0.197921359417884
ELAVL1|ELAVL1	930.736317290874	0.123137266444722	0.200523250502864	0.614079744547944	0.539162632523107	0.797970044424316
EYS|EYS	141.243421411497	0.397563261694428	0.679338734489557	0.58522095312753	0.558399157777071	0.80972693327029
GHITM|GHITM	2878.48071318927	-0.260312302768261	0.217324850847671	-1.19780274438436	0.230993818564959	0.549278900307589
MAGOH|MAGOH	359.159017037028	-0.496825211127271	0.319156967483543	-1.55667982135746	0.119546521836857	0.400705907026923
POLR3A|POLR3A	538.429262526567	1.18835111062311	0.300677623825707	3.95224325476232	7.74219778828587e-05	0.00470372956019987
SLC25A10|SLC25A10	72.8480307327539	-0.0820347464637368	0.625022356822077	-0.131250899377171	0.895576832300454	0.96529374840794
CCNL1|CCNL1	6525.76808532004	-0.0880571995131716	0.585836067307687	-0.150310307656294	0.880519801047807	0.960626561416411
IL2RG|IL2RG	3159.96376884556	0.302132425939666	0.3344759237332	0.903300968773664	0.366366182525332	0.680314085646073
QPRT|QPRT	33.3587775224402	0.0259664305142943	0.766468459824679	0.0338780156984331	0.972974424054543	0.993161779417774
TLCD2|TLCD2	19.6753612047226	0.773431323897194	1.32520494331663	0.583631481151514	0.559468275175625	0.810126248359601
ARHGAP33|ARHGAP33	134.98999224736	0.871100139694384	0.830508106499012	1.04887614326426	0.294235126818576	0.616190147822219
DNMT1|DNMT1	2577.21093479589	0.880916573872151	0.285044417444406	3.09045369760298	0.00199850962008374	0.0400923104983191
UBE2V2|UBE2V2	619.198239760969	0.731536988115887	0.328098715680658	2.22962466219435	0.0257723711743617	0.179987748710555
UBR4|UBR4	7941.14029686806	0.476293194164711	0.295491226472215	1.61186915716936	0.106990415079858	0.376095133952942
GUSBP2|GUSBP2	34.384426206329	2.53411109337127	0.763117722337996	3.32073416616169	0.000897810078392718	0.023911721775851
ANOS1|ANOS1	5.44126297109893	2.33830513357807	2.60375021618072	0.898052785189196	0.369157408858399	0.682215186839835
HAUS8|HAUS8	133.4103888973	-0.935073077814838	0.322700114147675	-2.89765338411664	0.0037596584621654	0.0597624667282008
MPV17|MPV17	331.692653185168	0.42390443515479	0.426381906360666	0.994189548925698	0.320130595185666	0.639784615098133
PDLIM4|PDLIM4	5.77725297413447	-0.757807170651777	1.93272576215624	-0.392092445545059	0.694989909121504	0.881008556324218
FBRSL1|FBRSL1	481.39078221948	0.521860979113525	0.492015945558242	1.06065867137989	0.288845048460224	0.611124385588418
PTPN22|PTPN22	1799.86469625261	0.00353179721348145	0.617420499676242	0.00572024611319745	0.995435928832627	1
ZNF436|ZNF436	236.836640538547	0.185782376514302	0.381809019524036	0.486584567189896	0.626552762386228	0.847553761664493
EIF4A1|EIF4A1	6415.63033960352	0.268933245319715	0.440470677521691	0.610558793227437	0.541491709625128	0.799960753437191
SLC26A1|SLC26A1	84.7252067503196	1.21088466591504	0.668326543680925	1.81181591149423	0.0700146457050615	0.307536508720521
TTN-AS1|TTN-AS1	225.919544590006	0.00383227152430612	0.49764829573874	0.00770076288238316	0.993855740917354	1
SMPD4|SMPD4	1182.82329701622	-0.366167358691646	0.407771897549784	-0.897971049235785	0.369200984134032	0.682216603651499
VDAC1|VDAC1	2361.84799604141	0.0921551662175043	0.357571044280507	0.257725472158788	0.796618786091762	0.924852167104856
GPM6B|GPM6B	82.1082943066192	0.74065209639732	0.752306003035163	0.984509087271902	0.324865265608111	0.644257955822314
HIST1H3C|HIST1H3C	1191.74548200982	-0.774617326187114	0.855221495910957	-0.90575053350596	0.36506790872897	0.679274901554845
KIRREL3|KIRREL3	6.21735437535459	1.90312994611862	1.63636821712758	1.16302060025298	0.244821144452832	0.566040289029665
CSRP2BP|CSRP2BP	407.356371804892	0.43069515824391	0.290542410742	1.48238309561754	0.138238389315144	0.430380693030459
SLC25A12|SLC25A12	692.070212434491	0.860314986060107	0.438846750493235	1.96039958161515	0.0499491047278152	0.258874048546831
TREML4|TREML4	22.5096078966294	2.25967677642773	1.56370126997968	1.44508213928681	0.14843481517241	0.444731338122743
PRELP|PRELP	4.94103762505498	3.3338980011535	3.60524015367235	0.924736732935125	0.355102867167018	0.671022007027468
EIF4EBP1|EIF4EBP1	148.230627434431	-1.0147961497925	0.526403810213788	-1.9277902821037	0.0538812169581398	0.269437649651249
GSG2|GSG2	85.7610548219779	2.46746882939983	0.830355528711111	2.97158114094798	0.00296270574547799	0.0518762179351798
LINC01465|LINC01465	68.1200130719553	-0.258805179467648	0.560129184971451	-0.462045518090328	0.644048678900174	0.857124964622994
ATXN3|ATXN3	906.999413015386	0.217588856257394	0.365316526045455	0.59561733659517	0.551430892339663	0.806575321636583
FBXO30|FBXO30	431.155381767778	0.502400728598545	0.446608291425835	1.12492476795401	0.260620915449835	0.582948625387623
POLR2G|POLR2G	633.092545692056	-0.0172491659105739	0.275875556415268	-0.0625251694449116	0.950144618830759	0.985786800213506
INSIG1|INSIG1	2588.36092995944	-0.666411364756068	0.412516386368791	-1.61547852831304	0.106207106497993	0.374698847310134
NFATC2|NFATC2	2395.71901262259	0.699542847609988	0.362198096650428	1.93138189868829	0.053435841989635	0.268153055393018
TOMM20|TOMM20	3283.81880412436	-0.892150678687531	0.360962697924028	-2.47158690861542	0.0134514850875517	0.126935801603297
ZFP2|ZFP2	6.73168888519298	2.42512037187717	1.6901780753438	1.43483128035718	0.151335181892956	0.449086428867815
RNF166|RNF166	2018.56733007913	-0.760682218020121	0.445483083086526	-1.70754456656298	0.0877208816613229	0.342615166259919
CANX|CANX	9983.85269348004	-0.55588696580281	0.279520611091569	-1.9887154783756	0.0467326165490382	0.248864044374925
KPNA4|KPNA4	3170.8888175144	-0.266187457379018	0.291916545242109	-0.91186149506616	0.361841633389008	0.676526159809127
GYPA|GYPA	6.36918218020468	1.55490189999662	3.48340784387203	0.446373772376952	0.655327275001137	0.862121232859629
UGGT1|UGGT1	3107.18044200359	0.671363649517402	0.214249585879367	3.13355867999396	0.00172700383493771	0.0363543889889724
OR2A4|OR2A4	48.6666766396251	0.760181137510769	0.781702956944619	0.972468033742676	0.330817760237787	0.648869125843219
HDAC2|HDAC2	689.65733856035	0.093180412267988	0.390353598441718	0.238707706653562	0.811332240445745	0.930851075866247
LOC100294145|LOC100294145	260.407396259615	0.836395960474774	0.552783799048396	1.51306163804838	0.130264002814622	0.419075389077893
LRRC4|LRRC4	95.1446554992725	0.610915576062114	0.678148656462131	0.900857902232279	0.367663876698376	0.681663521176658
IL16|IL16	4607.82299010118	-0.133105755149669	0.454185172068284	-0.29306495089553	0.769472506271131	0.914156898194902
DNM1P46|DNM1P46	50.6972808633547	2.39735559739334	0.999220016418808	2.39922695502581	0.0164297279428515	0.141822586592116
ICE1|ICE1	3313.22904275732	-0.132805742811453	0.246585276458572	-0.538579369858545	0.590177125680549	0.827232401794263
AFG3L1P|AFG3L1P	305.742369260174	0.604250923516823	0.455720697032131	1.3259238113432	0.184864934951012	0.494905781634575
PCNA|PCNA	1572.10936432844	0.293954237145502	0.491467148496144	0.598115739871896	0.549762708545505	0.805557373640792
ZNF850|ZNF850	157.75336820056	0.720207220994925	0.493524394750653	1.45931432904912	0.144478613331056	0.438657935117605
SH2B3|SH2B3	2217.22401312096	-0.913106772449757	0.458516457894395	-1.99143729026203	0.0464328330255871	0.248366159354643
N4BP2L1|N4BP2L1	493.866771082116	0.212088346998651	0.400176621029906	0.529986850438226	0.596121047878756	0.831641836081174
OMG|OMG	70.9793896957005	1.55182974239619	0.878761348210059	1.7659285374318	0.0774078388025234	0.322405955606377
TMEM208|TMEM208	229.862397412567	0.181012765708028	0.247664255028741	0.730879656763637	0.464852662837476	0.751994698744629
WDR5B|WDR5B	316.965091293066	-0.0706795627184793	0.419097229067802	-0.168647172580195	0.866074173604618	0.954896557206022
YME1L1|YME1L1	4242.57430157124	-0.547396413644307	0.270134877037745	-2.02638185652651	0.0427256687538122	0.237671103605435
FNBP1|FNBP1	6506.65157186763	0.0664133643745755	0.308599883659778	0.215208650071282	0.829604647152475	0.939269297507248
DHRS7B|DHRS7B	87.3487113315201	0.0935277224038169	0.350523127382807	0.266823256719591	0.789605246952246	0.921959480719771
CPEB2|CPEB2	658.236166404338	-0.0874065541422103	0.400795856357251	-0.218082479536166	0.827364848179333	0.938327490337339
VTI1B|VTI1B	595.274968774805	0.184589083588842	0.19674290830155	0.938224839626344	0.348128875678292	0.665091334554588
MARCH5|MARCH5	502.538092037976	-0.39857857416409	0.236640703161238	-1.68431959861323	0.0921199197600436	0.350514271791022
BAHCC1|BAHCC1	58.0565328298718	0.00791261170787418	0.953470391101671	0.0082987492655453	0.993378632088563	1
PDIA3|PDIA3	4198.76524974664	-0.313490035950269	0.241627952632916	-1.29740798833207	0.194490845384025	0.508086872593125
EPB41L3|EPB41L3	519.734977605146	-0.5869711070828	0.803243798931404	-0.730750872728402	0.464931335837933	0.751994698744629
FABP3|FABP3	16.8502141832743	2.18304101616392	1.05663650440428	2.06602839014604	0.0388257989793549	0.225657212476484
BOK|BOK	8.98841997492526	5.07061792384167	1.50773573492327	3.36306808042838	0.000770813518006488	0.0218957210971826
NLK|NLK	453.453455985278	1.35036993821224	0.332586981995263	4.06020082358929	4.90305259367542e-05	0.00330849461973228
MYOF|MYOF	2355.09144655557	4.26473938631952	0.897203790170542	4.75336755488837	2.00056175047163e-06	0.000294427501759066
FBXO45|FBXO45	570.497154603034	0.481252585892195	0.445025460044019	1.08140461411936	0.279517170071778	0.60132550759525
TMSB10|TMSB10	17843.3663721167	-0.525712389425223	0.333553588317319	-1.57609573945011	0.115003740793753	0.392308868549907
CCDC144CP|CCDC144CP	73.9046148946404	0.108136347837011	0.792153457654301	0.136509342719049	0.891418639267595	0.963999550079454
MMP16|MMP16	158.357754114705	5.9320478527067	2.32599736403797	2.55032440897033	0.0107622722396379	0.112375236498531
FAM157C|FAM157C	42.115242581326	0.637300096486441	1.13492530376439	0.561534837907484	0.574432987880905	0.819276451384125
RAB26|RAB26	34.2647952317523	-0.718282974006215	0.70759308455811	-1.01510739672474	0.310054636116231	0.63203017883896
AIRN|AIRN	22.1070428213237	0.489663585536255	0.83662736263257	0.585282776307312	0.558357594078899	0.80972693327029
UBAC1|UBAC1	525.296121897957	-0.254105632056385	0.218601811136852	-1.16241320570444	0.245067661693284	0.566296036874356
RBP7|RBP7	71.219056191026	-1.29868405639301	1.21393724594121	-1.06981152504806	0.284704153587319	0.606845139329835
RPL7A|RPL7A	19415.6546305886	-1.32767505509949	0.385851402473474	-3.44089731587996	0.000579788517506842	0.0178990046489635
CD46|CD46	3441.10362873804	-0.0313361479192916	0.267215904868848	-0.117269022346075	0.906646872210187	0.969694419497699
SLAMF6|SLAMF6	1966.4832204444	2.4886966740468	0.908012628215746	2.74081724935601	0.00612865846255384	0.0803968269657417
MED11|MED11	138.182831295896	0.145759218021716	0.425866847453898	0.342264768655172	0.732151646744098	0.898293282179296
CARS2|CARS2	685.881837252604	0.19558665453683	0.421100650111729	0.464465335033172	0.642314389859709	0.856563606368687
TSSC1|TSSC1	416.481847900797	0.59000487890683	0.320902475720481	1.8385800158823	0.0659769828475752	0.298848249183816
DPP8|DPP8	1127.41011908625	-0.126913479507724	0.274495820639075	-0.462351227105197	0.643829469224662	0.856966840683255
MORN4|MORN4	13.9104899522467	4.06161070435337	1.56970888271506	2.5874929734284	0.00966771674180273	0.105506598890049
DAAM2|DAAM2	21.2178919348899	3.53911946388925	2.66617299948668	1.32741553701528	0.184371262914214	0.494462913156827
PRNCR1|PRNCR1	90.3959965493134	-0.928880797484051	0.414932170946921	-2.2386328718842	0.0251798135663351	0.178234873598052
FAM73A|FAM73A	599.714630048235	-0.348626787871004	0.275046607160934	-1.26751895422225	0.20496979060425	0.520717625360228
SNORD116-9|SNORD116-9	9.13561616292262	-2.10286846862197	0.876495040266012	-2.399178970806	0.0164318812253518	0.141822586592116
HDGF|HDGF	2829.08432845276	-0.327129480994304	0.327397566359325	-0.999181162621329	0.317706939450533	0.63836325333127
SNORA2B|SNORA2B	27.375860790787	-0.709647956363805	0.647247977875908	-1.09640814745019	0.272900200047611	0.594228828108592
SLC25A17|SLC25A17	237.753182390612	0.615987529178819	0.373890023705165	1.64750993640997	0.0994532755445794	0.364171901498148
CCS|CCS	198.655742967667	0.130571429964161	0.430738919486077	0.303133578270449	0.761788065526668	0.910795283610287
LOC106099130|LOC106099130	4.65990978708125	0.904722802330672	1.37984374848216	0.655670472345781	0.512036171441523	0.782445535163773
MYLIP|MYLIP	1116.09469910356	-0.585529772500594	0.610332957325304	-0.959361223202814	0.337376802637131	0.654990560114188
HMMR|HMMR	419.357031912928	0.256723632191411	0.77265262528929	0.332262680263709	0.739690917446443	0.901832659806875
GOLM1|GOLM1	211.236775150918	0.164757476145503	0.468008490772642	0.352039502260959	0.724808637800864	0.8948740467468
NDUFB7|NDUFB7	568.751955615914	-0.536655396306844	0.373371525517848	-1.43732277270616	0.150626301045002	0.44789250057564
CANT1|CANT1	838.040709075741	0.517460563433329	0.279448155137872	1.85172295439928	0.0640656160791421	0.293933941871302
TPPP|TPPP	376.851095323687	-1.20101522354082	1.07623556878336	-1.11594083895454	0.264447459224303	0.586749096776399
POC1B|POC1B	690.915510659513	-0.411212617850448	0.342072139070567	-1.2021225083333	0.229316066910158	0.548001536168016
RAB21|RAB21	1301.71630102087	-0.62669599714382	0.278595462616133	-2.24948386186506	0.0244817284300501	0.176128136433972
LRIG2|LRIG2	671.002526991185	0.0916531671713928	0.34651711261523	0.264498242178198	0.791396019136169	0.922653016704573
RHOXF1-AS1|RHOXF1-AS1	19.6084633925753	4.02925547696582	1.48307101408455	2.71683246365175	0.00659099616786032	0.084793885891267
WBSCR16|WBSCR16	561.124824715095	-0.0135912258990788	0.334796764955792	-0.0405954516940255	0.967618410191836	0.991428489904875
PDE3B|PDE3B	4112.83071497844	-1.11903575847641	0.764791275437925	-1.46319106194777	0.143415105838619	0.437098701091057
LHPP|LHPP	150.697812547237	-0.753489442198262	0.589124546361232	-1.27899855277164	0.200897565526495	0.515543690599883
MMP24-AS1|MMP24-AS1	370.353378314487	-0.333608305676892	0.347408385229696	-0.960277068316355	0.336915788131225	0.654644179322077
HBS1L|HBS1L	2298.29420329766	-0.264474772135254	0.433991758906441	-0.609400447606814	0.542259041285662	0.800522380531326
CTHRC1|CTHRC1	502.001215726781	8.59808410915521	1.40732283687934	6.10953214418161	9.99236296999532e-10	3.96720047962233e-07
PSMD4|PSMD4	1520.49157780233	0.00620258747841013	0.266735571836556	0.0232536944199209	0.981447908214524	0.995800751745861
AHR|AHR	5909.34839747018	0.361065974733206	0.548357394527275	0.6584500880935	0.510248959097177	0.781042789357751
NTAN1|NTAN1	409.794777516396	-0.258838463256185	0.352321164157692	-0.734666235209004	0.46254278855008	0.751192017325625
TM9SF1|TM9SF1	397.856390858528	0.077328031246383	0.275822594608156	0.280354230429302	0.779205748328229	0.918320621795033
ATRX|ATRX	4323.13017380568	0.612163170266501	0.416800071932877	1.4687213642446	0.141908380296294	0.435643139730531
OSBPL2|OSBPL2	872.884342521244	0.133998395890412	0.215166207144707	0.622766918972053	0.533437700185098	0.794732338850364
FBXO8|FBXO8	440.135169491357	-0.395559898210784	0.371226572560293	-1.0655484478998	0.286627813760273	0.609023747763772
CHCHD2|CHCHD2	3313.11420690676	-0.746648295680126	0.351626512509179	-2.12341296551304	0.0337192616759758	0.210170018023589
YTHDF2|YTHDF2	2031.18264671048	-0.477925707418262	0.267755793797024	-1.78493133851871	0.0742724546931265	0.316347351697039
TAF1A-AS1|TAF1A-AS1	6.10815602987272	0.52251533202786	1.18382153037789	0.441380156231037	0.658937805662649	0.863875458322282
IMPAD1|IMPAD1	1846.7177930253	-0.294507593513891	0.25644762235717	-1.14841225980919	0.250798414964814	0.572841772111754
POM121L10P|POM121L10P	34.9341708002413	0.848146844710634	0.508552800980442	1.66776555566204	0.0953622760083756	0.356142100947469
SETD2|SETD2	5500.3681804665	-0.493841935915081	0.272623269052196	-1.81144455362147	0.0700720645653032	0.307603570650259
IPCEF1|IPCEF1	4141.53779442834	-0.0414811948826396	0.611866473283443	-0.0677945216707824	0.945949204804107	0.984256337691768
SNORA70G|SNORA70G	36.667498544484	-0.318102178216419	0.815222134868519	-0.390203068109434	0.696386393071345	0.882017100861637
TTC32|TTC32	163.522917854287	-0.0531328101817216	0.414816549111646	-0.128087489024989	0.898079736802857	0.966403649807729
NAPRT|NAPRT	461.117567049979	0.788626376220212	0.8395316037249	0.939364727570913	0.347543516253221	0.664774394208114
VNN2|VNN2	489.201934568808	-0.921445255274453	0.860969626463801	-1.07024130346972	0.284510707247141	0.606779633850092
RBAK-RBAKDN|RBAK-RBAKDN	5.59788359977045	0.320359370090748	1.56548526301655	0.204639020027212	0.83785416691512	0.942282367429179
CRACR2B|CRACR2B	54.7196050425348	1.33492995813874	1.16079821915662	1.15001034297644	0.250139611311687	0.572437459023205
RPL35|RPL35	10539.9982273063	-1.20159172709153	0.435040618197829	-2.76202192813436	0.00574446201943582	0.0771579211610847
MOB4|MOB4	1198.31844272419	-0.524545118752238	0.365894957974909	-1.43359482638241	0.151687920762743	0.44927414699194
TMEM121|TMEM121	20.4496219205331	-2.08642924092132	1.61690373921016	-1.29038556243337	0.196916822379283	0.510440934050883
EIF4EBP2|EIF4EBP2	2844.54166839578	0.0312309245045074	0.259217103447139	0.120481727822702	0.904101553287098	0.968307510521791
ITPKB|ITPKB	4661.99027284744	-1.97193787989049	0.441244897355019	-4.46903271111122	7.8574115067605e-06	0.000842871825491015
PPCDC|PPCDC	181.44012222255	-0.395867255501901	0.406331524101953	-0.974246968351324	0.32993392898171	0.648024854530115
LOC151484|LOC151484	8.51070212788136	5.14784785668735	1.98002768804189	2.59988680349123	0.00932545158938357	0.103245207220465
FAM53B-AS1|FAM53B-AS1	29.7386791879874	-0.163250662400397	0.829947280998238	-0.196700038831435	0.844062279704428	0.944659187040382
TSR3|TSR3	317.734385245552	-0.325600735594754	0.358833817460051	-0.907385869869979	0.36420277900573	0.678907605894167
PMP22|PMP22	64.9831723159052	-3.23690032228362	1.17591401504017	-2.75266752575701	0.00591118941288307	0.0787174927119655
DPEP2|DPEP2	259.457540238633	-0.772018293578642	0.711567260014183	-1.08495477091407	0.27794168787005	0.599321105206252
FAM41C|FAM41C	5.3125622984995	2.6301127370038	1.47595909847024	1.78196857875654	0.0747543558539494	0.317622290477507
UBE2E1|UBE2E1	1103.13733478776	-0.258962651879597	0.349534113033135	-0.740879479923747	0.458766518445999	0.748389531403101
GLT8D2|GLT8D2	15.6647820941089	1.50007156151606	0.867975771133142	1.72824128438253	0.083944974931666	0.33532951642025
CCR8|CCR8	340.963810316749	3.05936654169633	1.55877045590381	1.96267932209585	0.049683447291706	0.258164070337458
ARFGEF2|ARFGEF2	2790.53098110229	0.0321885423217116	0.251284562897958	0.128095979914145	0.898073017404463	0.966403649807729
HOXA11|HOXA11	11.0846283986647	2.22045943675419	2.45189253947575	0.905610421747503	0.365142090649532	0.679274901554845
HIST2H3D|HIST2H3D	587.89121937363	-1.26546842415335	0.588987726762581	-2.14854803700088	0.031670244587831	0.203261058497538
YDJC|YDJC	299.63871861355	-0.120448192068848	0.333381651620042	-0.361292205145483	0.717881020148923	0.891909972895
SUPT4H1|SUPT4H1	984.72218985718	-0.488539463451622	0.223442744882365	-2.18641900281355	0.0287849645935774	0.191064119572921
RHEB|RHEB	530.964273534561	-0.152562504566458	0.371677884041014	-0.410469686567693	0.681461435889693	0.875372118652295
SNORD18C|SNORD18C	17.1709829009351	-0.284915108352232	0.676778994279601	-0.42098692595433	0.6737646287945	0.87173245492836
AAED1|AAED1	315.614148228824	-0.871381618979754	0.501444412120789	-1.73774320326827	0.0822560724631573	0.331980063614899
NAGPA|NAGPA	285.396245638885	-0.24501824880796	0.413891432433753	-0.591986761763128	0.553859453208015	0.808809846170171
GDI1|GDI1	1450.28693360655	0.753118655024341	0.371607699343905	2.02664976090112	0.0426982437375029	0.237595963848321
DEDD|DEDD	639.56789829084	-0.30469048698918	0.328032613122804	-0.928842056552209	0.35297094535553	0.669026310548419
PRUNE2|PRUNE2	96.0296422807163	0.411434516827201	1.22289787240163	0.336442254183655	0.73653739040229	0.899825842918842
KIAA0195|KIAA0195	751.245966536941	0.426657415089666	0.486785861601167	0.876478650563673	0.380769877690319	0.692231910500168
GMNN|GMNN	161.786417911368	-0.134090076579776	0.534252501528691	-0.250986333608352	0.801824675275221	0.926922650252627
ATP13A1|ATP13A1	1446.05557147782	0.834825523100535	0.433326073330569	1.9265527151044	0.0540353962968375	0.269753975459229
MGEA5|MGEA5	5539.91526250856	0.11494698409945	0.337543437332163	0.340539828023186	0.733450034629573	0.898690805368267
CALM2|CALM2	7567.71439949321	0.166115971871715	0.312558656776658	0.53147135192104	0.595092188379925	0.831307899519032
DNAJB4|DNAJB4	148.471514036429	-2.30489924978266	0.408067170547002	-5.6483329611961	1.62011163315443e-08	4.60975763353539e-06
ABCA2|ABCA2	1534.77826205614	1.1181479286125	0.652022413556614	1.71489185856863	0.0863650555975028	0.340277920415548
IL1RL1|IL1RL1	4.47870720094823	0.759426458240063	2.59526687467104	0.292619793999537	0.769812782289687	0.914196555035698
BMP2|BMP2	14.2720208874783	-0.641851288990101	2.10900153577286	-0.304338938641355	0.760869682449231	0.91048471394818
ATP11A-AS1|ATP11A-AS1	38.2420180408577	0.716252842072767	0.771510634643919	0.928377147261677	0.353211968523656	0.669122358838793
RRAGA|RRAGA	594.449071898212	-0.214269110879781	0.259826112495354	-0.824663498298741	0.409562660367855	0.715592440671376
DAB2IP|DAB2IP	9.07161741916082	2.57600782534144	2.41130384153393	1.06830494812414	0.285382977202855	0.607714727036586
CCT6P1|CCT6P1	270.854893424035	0.105579962548489	0.398494060685434	0.264947393110165	0.791049988077116	0.922653016704573
ZNF500|ZNF500	208.825821672863	-0.758355483613422	0.437104921129385	-1.73495068793551	0.0827495399460528	0.332791553818378
IRF2BP1|IRF2BP1	296.893731480412	-0.609875934727911	0.56899746629501	-1.07184297093461	0.283790568740127	0.606379232697262
PKD2L2|PKD2L2	21.7000432957317	1.3058878656467	0.842770439112549	1.54951788178739	0.121257276296937	0.403922774817816
TNPO2|TNPO2	830.016669210209	0.378033151220731	0.33917688637524	1.11456047391892	0.265038816235632	0.587171382140503
CCNB2|CCNB2	417.852637190255	1.23177423397441	0.883429374421439	1.39430979955936	0.163224072963835	0.466214049462704
ST3GAL1|ST3GAL1	3905.45706261916	0.522776207887256	0.338393898442481	1.54487480505242	0.12237654874327	0.406066557851333
EFTUD1P1|EFTUD1P1	15.2926372382906	4.13311378851218	1.59907414005066	2.58469178194654	0.00974660826216858	0.105983500797288
ADRB2|ADRB2	134.569924937559	-0.290186369532291	0.9556970382672	-0.303638452263528	0.761403353150551	0.910526621251485
FOXK2|FOXK2	1140.38389553279	0.436955013029767	0.304926453837708	1.43298492974417	0.151862144134859	0.449400333622867
LOC100499194|LOC100499194	24.9404507179019	1.05362411496666	0.713258698230908	1.47719770902193	0.139622647739001	0.432175244754922
CENPA|CENPA	113.59324924438	0.250352301276916	0.853852712652322	0.293203145656406	0.769366879815955	0.914120051571715
SNORA44|SNORA44	73.7491196543437	-1.42428364755372	0.544166054479969	-2.61736952503374	0.00886103570452944	0.100515349865599
NDUFA10|NDUFA10	951.610457235723	-0.536694489912191	0.295688282372828	-1.81506850932795	0.0695133818494263	0.306569996107829
LOC613038|LOC613038	45.0723326583303	-0.165621876486399	0.728809981926502	-0.227249736685277	0.820229554919251	0.934690956681549
OR7D2|OR7D2	8.68659827744235	3.91843473292241	1.89540533803615	2.06733338473255	0.0387027505385291	0.225635752458169
CHFR|CHFR	924.108297031269	0.351600205899994	0.561208785399956	0.626505170708294	0.530983646432933	0.793014855384747
POP4|POP4	481.719270312773	0.375500478844391	0.34433822839785	1.09049895677147	0.275493412607581	0.596704331392619
GSTCD|GSTCD	197.153093241394	0.333651384038595	0.464687348345776	0.718012627686872	0.472749500764225	0.756196419859291
LRRC66|LRRC66	15.1493107885343	3.49205053851877	1.57747423423321	2.21369735412269	0.0268496050773034	0.183652760772389
MYPOP|MYPOP	52.8557075467197	-0.207078738614955	0.438341629237669	-0.472414036912466	0.636631287052405	0.852704325479261
WASF3|WASF3	15.5138770164946	5.76612487356846	2.17296539490271	2.65357418350724	0.00796442617349392	0.0944883138525978
AP5M1|AP5M1	1020.21614188652	0.387193069079136	0.318212556772466	1.21677495384318	0.223689851931658	0.542346651856676
SLC9A3|SLC9A3	7.45696658604553	0.152870021894173	1.77736476191373	0.0860093691345459	0.93145896933577	0.979276276665547
DHRS13|DHRS13	211.838341856627	-0.756543769261941	0.351695070478717	-2.15113555112432	0.0314655021713979	0.202556204023418
STXBP5L|STXBP5L	7.94215331998391	0.924094717437871	1.76882221293994	0.522435047840078	0.601367458948531	0.834352807322533
LOC101926963|LOC101926963	104.304382646448	0.265655770477508	0.652290938840319	0.407265768477186	0.683812801678265	0.876599753441908
MIR3654|MIR3654	440.30909952075	-1.62341801057618	0.457179564696976	-3.55094176541378	0.000383855340037444	0.0137095781697055
CASP3|CASP3	1022.36281335869	-0.16935828169743	0.529089995375954	-0.320093525066731	0.748897433903864	0.90627913135302
HMOX1|HMOX1	703.480814606148	-0.659366719613763	0.859238768464451	-0.76738474078878	0.442852798302731	0.737372197218329
BOLL|BOLL	65.1315434097622	5.92064387357006	1.36380492811162	4.34126886589862	1.41662247657367e-05	0.00130024617849815
MTRF1|MTRF1	242.856193576147	-0.0373301787593227	0.428475863071757	-0.0871231777017765	0.930573602290695	0.979032016904341
RASSF1|RASSF1	987.872046314379	0.213823202739054	0.40789021521554	0.524217533941244	0.600127246835665	0.833838394887155
TMED10P1|TMED10P1	42.0387489804816	0.124015439719239	0.521146637515111	0.237966496935603	0.811907079412731	0.930951322718671
MSL3|MSL3	1550.14240514778	0.0362389866085267	0.445660961351199	0.0813151470540605	0.935191328273658	0.98050343620853
CEP72|CEP72	117.499577127067	0.0713886522081559	0.392723193705316	0.181778548739658	0.855756519661659	0.950151962354898
FBXO2|FBXO2	17.8479643132059	0.259426224019542	1.0310675995275	0.251609326234698	0.801343049209579	0.926739502513611
ERGIC1|ERGIC1	1294.47035838252	-0.726504738123631	0.410191971030888	-1.77113349219828	0.0765385057037503	0.32049200933112
ZNF331|ZNF331	1822.59234134399	-0.993386226614726	1.00528384993705	-0.98816491150925	0.323071889618284	0.642605534144629
TTC38|TTC38	333.675354438033	1.68479491834977	0.550431665519931	3.06086118202944	0.00220701392845596	0.0425261193979686
OASL|OASL	706.446383930129	-0.885982039180527	0.952836497178452	-0.929836379907891	0.352455807053753	0.668540735029403
RORC|RORC	45.4516485316878	-3.26730808847301	1.21376749614982	-2.69187311312686	0.00710519720735257	0.0886695370788911
DUSP16|DUSP16	3678.83385691672	0.419725193131942	0.683088823738163	0.614451852447272	0.538916780143642	0.797744495847764
TLR1|TLR1	741.082123826393	0.712394483197652	0.572650318416414	1.24403053711326	0.213488324214969	0.531671343486749
DSTN|DSTN	981.274178932689	-0.177216282150748	0.437360387312988	-0.405195091488536	0.685334112762559	0.877449371175101
SNORA24|SNORA24	143.591561928628	-0.820718294371452	0.645307150259702	-1.27182581820325	0.20343501350096	0.518751687899685
LRR1|LRR1	261.31854069545	-0.4603119176363	0.31222876569934	-1.47427773544593	0.140406827279033	0.432976722749142
HLA-DPA1|HLA-DPA1	4803.77606588611	-1.04875016933228	0.634979894508954	-1.65162736395505	0.0986105381788062	0.36274059637763
FAM21EP|FAM21EP	17.5052305434457	-0.423415803541751	0.630953143189614	-0.671073293020281	0.502173839575977	0.775847220745799
B4GALT6|B4GALT6	54.4274604433095	2.36153953558797	1.19500130658649	1.97618155107603	0.0481342186241688	0.253455946609306
ZNF680|ZNF680	458.515473439372	0.266774829605785	0.442299799764161	0.603153855706091	0.546406341807648	0.803466758599497
ADM5|ADM5	55.4806493042728	0.842094742295555	0.757740456742462	1.11132345488815	0.266429147026045	0.588282050713509
SNORD116-18|SNORD116-18	21.2102178445601	-0.481757436927047	0.770010948614342	-0.625650112889932	0.531544461449562	0.793380807309574
SIGLEC6|SIGLEC6	9.63718973291463	1.53504726241342	1.39869258397969	1.09748723915141	0.272428456038361	0.594228828108592
ACTR10|ACTR10	563.733654308258	-0.180967988674207	0.207518924683023	-0.872055350858377	0.383178182299319	0.694405202976958
XPC|XPC	2028.14763460186	0.339174894393728	0.324681233666686	1.04463966261112	0.296189541113537	0.618765183040256
LOC101927166|LOC101927166	7.46244222862931	2.47392405950554	2.22557518468214	1.11158862505868	0.266315065520199	0.588282050713509
PDE6G|PDE6G	11.694902934058	-0.828829564704981	1.3850354392053	-0.59841758647024	0.549561334101479	0.805400557625585
MSX2P1|MSX2P1	21.7251559160734	-0.164563471185387	0.8925210994459	-0.184380482755592	0.853714979833254	0.949443252781809
ZNF410|ZNF410	1362.48659951529	-0.506594828257121	0.318818930377903	-1.5889734892989	0.112066378076296	0.386738873361336
TNFRSF13C|TNFRSF13C	61.3346952251768	0.715314227702867	0.845918319477792	0.845606734400137	0.397772167450353	0.706838256939912
TMEM57|TMEM57	918.838822406444	-0.125517768322634	0.437413214288442	-0.286954678602517	0.774147022671217	0.916521357215188
UBE2W|UBE2W	858.769476093898	0.42496459787658	0.351104281737409	1.21036575166124	0.226138577601679	0.544406591859641
MORN2|MORN2	21.6538407618179	0.588475511756888	0.709507888774565	0.829413627483805	0.406870392875415	0.713370033102566
PDE3A|PDE3A	30.3613000921983	6.85323987907545	2.03431891774192	3.36881293257721	0.000754926464073353	0.0216164769051993
KIF23|KIF23	416.426132122146	0.790995784518626	0.795537709403533	0.994290748469595	0.320081338448151	0.639784615098133
SRSF3|SRSF3	5760.42406804359	-0.754721906913575	0.269247350615796	-2.80308016100233	0.00506170867528096	0.0714751782501212
ZNF106|ZNF106	4126.32230770784	0.164179317787193	0.287248105894601	0.571559270254804	0.567620595450152	0.814811062143245
ITPR1|ITPR1	1915.96851777543	0.442197371759944	0.588414260013026	0.751506892015422	0.452347654569544	0.743332289807609
AGAP6|AGAP6	260.631122018269	0.542314331476691	0.348635583841484	1.55553350435757	0.119819061518805	0.401090252829509
ARL4D|ARL4D	14.6448636197491	-1.3557891110099	0.787611280097246	-1.72139371955478	0.085179403157498	0.337240902297033
NANOS1|NANOS1	192.384843787989	0.711489231356922	0.452103148622209	1.573732086417	0.115549400575969	0.3930383276814
OTUD3|OTUD3	370.344731992783	0.139689622899535	0.362375826441671	0.385482730101533	0.699879799136867	0.883949687864511
SNORA47|SNORA47	68.6096080404816	-0.653420313342113	0.820639861120088	-0.796232725583501	0.425896779574385	0.726219518666989
GTPBP8|GTPBP8	285.190994542255	-0.410329490460668	0.290309569993728	-1.41342047549288	0.157532128708587	0.458057325200102
GFOD1|GFOD1	98.030440424677	0.501936381425797	0.948697013658787	0.529079752754788	0.596750126352055	0.831795442770981
MAX|MAX	1881.45906649876	0.027349309709515	0.278062341558991	0.0983567553814645	0.921649012326762	0.975923258379532
DACT1|DACT1	25.5841460889219	0.0655048255074752	1.37783074610179	0.0475419972248435	0.96208125921427	0.989023479462954
ZNF706|ZNF706	445.617194164895	0.302045948319148	0.244231889902634	1.23671789314476	0.216191833463652	0.534418635188171
LARP1B|LARP1B	577.642172933792	-0.190959735340625	0.324046641564453	-0.589297066677491	0.555662012261782	0.809222524067737
CERS3|CERS3	7.0966478718305	4.03655924048896	1.78507698781042	2.26128019578596	0.0237419117899725	0.173452932024344
ZCWPW1|ZCWPW1	74.388930011498	0.457903019720954	0.585719095012266	0.781779224239505	0.43434433279926	0.73168788831631
ABI3BP|ABI3BP	53.850282715058	-0.37324315337182	0.870329403032178	-0.428852744801523	0.668030391527872	0.868319855972284
GPX4|GPX4	1641.91723116259	-0.572743481012121	0.48676115859354	-1.17664170795184	0.239338543264394	0.559417799919186
ROPN1B|ROPN1B	5.61978536476682	1.72301633998726	1.50039597087873	1.14837441144164	0.250814032477151	0.572841772111754
RMDN2|RMDN2	41.9562139628653	0.0563524764670811	0.987020328844158	0.0570935317341156	0.954470688948889	0.987396925917439
ZBTB48|ZBTB48	362.932407184008	0.328049290583965	0.39867611598958	0.822846610135378	0.410595227069488	0.716663093398455
ZNF681|ZNF681	172.924205461124	-0.0321542815188815	1.20167179049208	-0.0267579565179893	0.978652787038284	0.994971437608241
IGF2BP3|IGF2BP3	81.661479319789	1.64034499192111	0.777310258197282	2.1102834738414	0.0348339462036687	0.213685946071492
HSPB11|HSPB11	237.41061506093	0.422735091426508	0.427283434044689	0.989355209549956	0.322489380740294	0.642149525819203
TMED6|TMED6	23.0200712836696	-0.38132482502241	0.851013579442212	-0.448083126091061	0.654093205480943	0.861789070035461
CTAGE7P|CTAGE7P	24.8253917959891	0.225954685600212	0.695089525720605	0.325072781618976	0.745125988328913	0.903914650234577
VASP|VASP	2446.32639211382	0.18102363303024	0.437485523566224	0.413781995698054	0.679033770666383	0.874410281475207
GCN1|GCN1	3377.64105081092	0.471312834114147	0.321976986351015	1.46380907360978	0.143246122559624	0.436774031851741
SLC35E3|SLC35E3	126.340840519238	0.3049284439183	0.3209878223109	0.949968885806995	0.342128062535654	0.659778989371632
BUB1B|BUB1B	412.841755584682	2.67817988009356	0.832999642811267	3.21510327550087	0.00130397599581915	0.0305370071339158
CNPPD1|CNPPD1	1066.0946589274	0.12803895770262	0.286067198370415	0.447583499373558	0.654453813863146	0.861819086470379
RNASEH2C|RNASEH2C	510.832462418513	-0.0543790919465702	0.251831039542665	-0.215934826959078	0.829038549456278	0.93892438080918
SNORA29|SNORA29	9.22530037403575	1.03271209092541	0.942982128800425	1.09515552775018	0.273448505288027	0.594653616844464
A1CF|A1CF	4.70054821796211	3.74637214372357	2.23037595149604	1.67970433020974	0.0930148568728277	0.352017210492777
TPR|TPR	8805.68409592484	0.68889693585931	0.308787531595355	2.23097393958919	0.0256828553043533	0.179695781047508
LGALS8-AS1|LGALS8-AS1	21.3569123754809	-0.693672812739785	0.716928073876331	-0.96756263008253	0.333262848206577	0.651117343165791
ARL2BP|ARL2BP	1252.82358862356	-0.29975336580156	0.324287247766551	-0.924345215132688	0.355306608584179	0.671022007027468
EPX|EPX	6.51111583540577	3.04373503877244	1.38573351673775	2.1964793389265	0.0280576524075434	0.188805771344731
LRRC39|LRRC39	28.556220519993	1.80017022034045	0.73157240792894	2.46068632555003	0.0138671545815453	0.129376221735675
FA2H|FA2H	31.0378022368769	3.00520426012845	1.81341442437063	1.65720765189757	0.0974775000509503	0.360635482108257
IKZF1|IKZF1	10801.0385050781	0.130171899452905	0.319162638189593	0.407854441206801	0.683380542046278	0.876406943489297
LOC101927827|LOC101927827	5.82038826327264	1.72186874150721	1.36801569857735	1.25866153677757	0.2081526098103	0.52423803317141
ATAD3B|ATAD3B	412.744812649793	0.357162784630866	0.519480091953785	0.687538926251365	0.491743179610619	0.770319624702346
PXT1|PXT1	7.79444180045397	-1.45093520071594	1.55166116129562	-0.935085079724765	0.349744455108679	0.665642661776499
ALPK1|ALPK1	208.651436819605	0.860813303897826	0.99507589445318	0.865073014728053	0.3869987148672	0.697881278146492
ANAPC2|ANAPC2	479.146355204391	0.400531379170657	0.383912902812333	1.04328710037247	0.296815343666286	0.619541697893487
FAM134A|FAM134A	1925.80636207444	-0.246379221168405	0.276546899710392	-0.890912975073742	0.372975858903242	0.68596038883436
NANS|NANS	365.30068097565	-0.420134632762618	0.308513336763034	-1.36180379483989	0.173259813654699	0.480630454446982
CYB5D1|CYB5D1	169.135506927789	-0.155964035064599	0.391703651634735	-0.398168448044075	0.690506022094008	0.879462758071389
CEP68|CEP68	1218.46846091079	-0.271211635294156	0.406703398255641	-0.666853624674365	0.504865635812722	0.77742576406604
CPSF2|CPSF2	1983.71201632277	0.849808101635844	0.339977037218914	2.499604410308	0.0124332055410008	0.122058473258174
INPP4A|INPP4A	2647.52748534787	0.638117110318438	0.389690966906873	1.6374952578024	0.101527029000558	0.366769954404615
C15orf62|C15orf62	78.2625977854564	0.485926661752775	0.451442035691651	1.07638771610688	0.281753893788505	0.603867118854737
POP7|POP7	206.169636080378	0.257793170115148	0.310563805151438	0.830081180868589	0.406492886435288	0.713148346236074
SLC39A10|SLC39A10	1595.663967775	0.488528256273364	0.424516115820402	1.15078848144376	0.249819264646342	0.571977924435907
LAMTOR4|LAMTOR4	863.748446867308	-0.73190005595338	0.40136427840842	-1.8235306312153	0.0682230621300081	0.303071589040723
GPR75|GPR75	41.7136187086377	0.180448305532946	0.603522484783665	0.298991852138911	0.764946262412769	0.912207501530511
FGFR1OP|FGFR1OP	282.941210925373	0.102396349352298	0.332730845591953	0.307745286344364	0.758276157371204	0.910357553796244
GOLGA6L9|GOLGA6L9	41.2433071679816	-0.863422946910594	0.589658413066233	-1.46427648241425	0.14311842019385	0.436543197655766
STX4|STX4	395.647990062758	0.557491892081504	0.264664919836744	2.10640644187143	0.0351690622095486	0.214354241357163
LINC00659|LINC00659	34.4450322480738	2.50079936519503	1.35212492207479	1.8495327793808	0.0643809190906899	0.294982018527976
FRMD5|FRMD5	63.5120756285192	0.0975099861851262	0.663730165460095	0.146912090574537	0.883201408576751	0.961546741102117
NPY6R|NPY6R	18.4248346412569	0.716799652597899	1.26471113951536	0.566769462371129	0.570870820584289	0.816924279045682
HLA-H|HLA-H	1269.85791341638	0.261620284729928	1.01097534796853	0.258780083268729	0.795804925801823	0.924650741455817
TSPYL4|TSPYL4	873.122026467523	-0.310012793081688	0.356465721835747	-0.869684724481127	0.384472722395454	0.695456486197838
PINX1|PINX1	247.580800822752	-0.0160171575872844	0.310996066610965	-0.0515027658125361	0.958924897978603	0.988565422729314
PTCH2|PTCH2	104.858060059889	-1.65870900165171	0.888350762429403	-1.86717800198155	0.0618767344987892	0.289474193507658
BHLHE41|BHLHE41	6.43058001407495	1.88723990372874	1.83335277215449	1.02939266920841	0.303295192541364	0.625360017486272
PSMC3IP|PSMC3IP	36.4595629404671	-0.164112128231111	0.572942754250705	-0.286437217354701	0.77454327293572	0.916672634700771
NT5C1A|NT5C1A	9.13496297216733	0.211999514973302	2.1273115404092	0.0996560733800761	0.920617375231835	0.975491717275925
RPP38|RPP38	217.054983773719	-0.0445840100088299	0.339514761380634	-0.131316852991986	0.895524660474933	0.96529374840794
MGC27345|MGC27345	257.208739461708	1.17541566909264	0.426989541238175	2.75279733008026	0.00590884632690903	0.0787174927119655
ZNF491|ZNF491	12.7285346072773	0.443061310253166	1.17231148614771	0.377938214790589	0.705476492929735	0.886819430623403
TRAPPC10|TRAPPC10	2620.29050753052	-0.240332180365712	0.273999798793357	-0.877125389960462	0.380418535314304	0.692034791123873
TRAT1|TRAT1	2531.9109984495	-0.343508173357819	0.694778787009863	-0.49441373251504	0.62101401758703	0.844238836458495
ZNF215|ZNF215	30.4429644538093	5.70171807618675	1.91463410330776	2.97796746978253	0.00290166779758936	0.0512720564342244
AKT2|AKT2	1884.59763740544	0.148243457560934	0.36545042366335	0.405645876874109	0.685002815144847	0.87741170474753
PCDH9|PCDH9	34.3823767276721	1.92726325242472	1.20408088140835	1.60060946252258	0.109463445124144	0.381715652875542
SMURF1|SMURF1	1015.90119906766	0.591945239773235	0.428917450503451	1.38009129513949	0.167558537140082	0.472606014058325
RNF113A|RNF113A	419.712624402346	-0.637662858000738	0.288384709334227	-2.21115349517963	0.027025209531019	0.184475960461238
SDHD|SDHD	1148.21018301546	-0.319423663016421	0.368194068224804	-0.867541578158708	0.385645340787716	0.696654263427606
PSMA1|PSMA1	2063.51644417377	-0.422305030261439	0.231127006952588	-1.82715570901702	0.0676763610893475	0.302055749062329
MTRNR2L8|MTRNR2L8	3392.88997140622	-1.27363637515962	1.23637971777855	-1.0301336691676	0.302947261909335	0.625207368889259
LOC101929829|LOC101929829	17.848376606975	0.528873410468065	0.690399343524559	0.76603985132447	0.443652590427466	0.737850659890667
PPP1R16A|PPP1R16A	157.702046430316	1.01267021562233	0.551172871813765	1.83730054109865	0.0661655400691101	0.299256386992122
FAM222A|FAM222A	18.0971781880898	-1.44469697997747	0.957863469439219	-1.50824937589829	0.131490714458575	0.421362247262341
GNB2|GNB2	2166.14393909589	-0.454002128792286	0.392539697543776	-1.15657634535589	0.24744549122414	0.568788127935709
LMF1-AS1|LMF1-AS1	17.7451071832919	1.22212760084771	1.00299120152884	1.21848287301508	0.223040529328431	0.5417968008957
CXCL3|CXCL3	183.680760975514	6.67808381767355	3.47105452625522	1.92393515202951	0.0543627123927004	0.270549142923472
PHYHD1|PHYHD1	10.9709743768253	1.23778656217734	0.990979803535483	1.2490532680498	0.211645591448159	0.529408576879557
MORF4L1|MORF4L1	3703.99978212196	-0.758214761922697	0.27639498760476	-2.74322905959109	0.00608382307999971	0.0802533904563878
VPS25|VPS25	472.61237162332	0.184852001361159	0.243661388632843	0.758642977446462	0.448066156246626	0.739993819788404
LINC00862|LINC00862	5.18002684088874	2.90851868288112	1.85002795264227	1.57214850658179	0.115916114298055	0.393501670967666
ETV7|ETV7	30.3317303726443	1.4708538418817	1.79451146603835	0.81964025848708	0.412421216239756	0.717941776653932
KCNC1|KCNC1	4.35975367110353	4.35223363535574	2.37568042398395	1.83199456939463	0.066952229698312	0.300396442946014
AKIP1|AKIP1	176.522743455707	0.620016508754758	0.405213417142155	1.53009866535897	0.125992308571156	0.412927758096906
ADAM22|ADAM22	286.455094183053	1.12264232078157	0.707568528274885	1.58661991866523	0.112598753372389	0.387908060769261
CSF2RA|CSF2RA	331.982724229925	-0.240970868168803	0.780931463871139	-0.308568522741153	0.757649768310845	0.910357553796244
HPSE2|HPSE2	4.79350807028317	3.67308186492851	2.11798130662395	1.73423714998853	0.0828760138859076	0.332824681050377
SLC17A5|SLC17A5	295.848278435782	-0.115224120647173	0.344144054186983	-0.334813631807127	0.737765676745333	0.900363613646224
CLEC2L|CLEC2L	6.86723002734783	5.47899176364203	3.07997311991954	1.77890895482398	0.0752546897572547	0.318741226242998
LL22NC03-75H12.2|LL22NC03-75H12.2	8.30702267715584	1.63319251311554	2.10432974325179	0.776110549381766	0.437683715373066	0.733792791036338
TAPT1|TAPT1	801.180691530209	-0.922984075436341	0.41081428962226	-2.24671852647827	0.0246580214775937	0.176526705729283
MRGPRD|MRGPRD	11.7697355194046	-0.68728428023875	1.54252971323858	-0.445556590800302	0.655917572987882	0.862631908639482
CCDC59|CCDC59	941.592146299339	-0.819670694809733	0.446684115698712	-1.83501196035948	0.0665039173254935	0.299724096246258
NPHP3|NPHP3	190.175545592317	-0.344461528465172	0.734305059371707	-0.469098672369088	0.638999108006535	0.854401062961119
PHTF1|PHTF1	467.560867232854	1.52663949131353	0.651761078187478	2.34232994636479	0.0191637648806078	0.15437408103523
AHNAK2|AHNAK2	27.3622241208212	1.76253579242618	0.912142410266526	1.93230330328701	0.0533220809539642	0.267818348351303
MIR548H1|MIR548H1	5.46881228867418	1.54873480717623	1.21035956082111	1.27956588877239	0.20069785301741	0.51546769169749
NFYB|NFYB	420.858439346537	0.146223499635971	0.431047773578253	0.339228059159493	0.734437932990996	0.899012051837005
S100A5|S100A5	10.6188869526021	-0.0666499989226361	1.34886073500924	-0.0494120684165214	0.96059091070539	0.988780027150434
CBX3|CBX3	3455.9369748625	-0.412687234997396	0.335488994481247	-1.23010662580905	0.218657179213746	0.53702310377366
LOC100129534|LOC100129534	8.72562138823246	2.04340707844461	1.2425451700753	1.64453343641485	0.100066063506138	0.365105383918007
CRAMP1L|CRAMP1L	757.779319470519	0.767002535780992	0.426159711140172	1.79980067503075	0.0718921173481736	0.31166638582225
CSDE1|CSDE1	15035.1444325323	-0.786486090196331	0.301799866933721	-2.60598554329069	0.00916103281510117	0.102297621789753
GNAS|GNAS	9139.08431999851	-0.726907713095227	0.394530632430488	-1.84246203803528	0.0654075944537383	0.2975753475021
LOC100272216|LOC100272216	87.0492801801381	-0.198843500718418	0.722803745183594	-0.27510026344414	0.783239209187931	0.919979111040716
LOC101927482|LOC101927482	16.4698192606878	-0.642195990936946	0.995845020227113	-0.64487543532676	0.519007911762648	0.786014404861241
PLEKHG4B|PLEKHG4B	7.93751348360726	4.03814720481966	2.41354088961031	1.67312152124826	0.0943033756390048	0.354251688180693
METTL21A|METTL21A	262.517546135096	-0.211319543425429	0.347548672559114	-0.608028630549542	0.543168485229639	0.801325702581562
PEX3|PEX3	263.361477150405	0.489833026169521	0.347004791941343	1.41160306008777	0.158066870876141	0.458697538602325
LINC00264|LINC00264	22.114850274125	-0.192866210762583	1.16668608378639	-0.165311143625414	0.868699088148762	0.955914164103051
SNORA5A|SNORA5A	85.8756780795442	-1.42851814870246	0.483558379620595	-2.95417928611493	0.00313501817707408	0.0532318726325128
ZNF793|ZNF793	106.100593835802	-0.161578025232841	0.603666939222247	-0.267660881745512	0.788960363248891	0.921941724855374
STIL|STIL	401.391631024001	-0.278269365542982	0.473059414649328	-0.588233437335264	0.556375616558343	0.809480528880521
SEMA4B|SEMA4B	284.906535466578	0.791673626444524	0.55857813370104	1.4173014994322	0.15639479697398	0.456015708614823
DOK5|DOK5	334.68872955563	7.82807947747141	1.32955286378821	5.88775346259444	3.91480509840553e-09	1.31046181647018e-06
ADAL|ADAL	128.961948288725	-0.21994124165996	0.532040275431561	-0.413392090441942	0.679319368686355	0.874459072167923
RPL10A|RPL10A	17042.4964685006	-1.22100718045987	0.398780806486966	-3.06185042157935	0.00219973345545572	0.0424449989328674
AKIRIN2|AKIRIN2	606.924604669369	0.025475826308974	0.308352135992277	0.0826192632880355	0.93415428375183	0.980278536161387
TRPS1|TRPS1	1586.54122340146	-0.658714955933607	0.843868593464494	-0.780589491106974	0.435043974555059	0.732396503960241
RLBP1|RLBP1	10.610428000851	0.295191509147786	1.37353039156836	0.214914435792515	0.829834029729474	0.939269297507248
HIST2H3A|HIST2H3A	225.04078591305	-2.07992916722234	1.14695833249512	-1.81343045191328	0.0697654563371582	0.307136631816796
ST6GALNAC2|ST6GALNAC2	49.7926124794652	-0.565251040509315	0.500686148956623	-1.12895282141765	0.25891773636574	0.581305049347173
SLC4A1|SLC4A1	46.7610024794837	5.63841860023513	2.05078916819324	2.74938969236053	0.00597063553056506	0.0792150926315903
PARP15|PARP15	844.359764702196	1.29038422774866	1.0151182451453	1.271166422158	0.20366944930645	0.518807048427292
CSNK2A3|CSNK2A3	221.73864235388	-0.0342011897338526	0.365667820171311	-0.0935307616563847	0.925481912532208	0.977288749350519
RXRB|RXRB	451.482084940522	0.778765120765863	0.314861845841507	2.47335500014146	0.0133851108486253	0.126699656153871
RUNDC3A|RUNDC3A	8.29942482216038	2.04331754045598	1.51924378664707	1.34495698347763	0.178639126516218	0.487277736354756
KDM5D|KDM5D	1365.61076917237	0.160152908634964	2.67400514715392	0.0598925207026707	0.952241236817492	0.986910362565053
ZNF826P|ZNF826P	9.71297056259163	-0.612410903555914	1.70291779847274	-0.359624465787575	0.719127984990878	0.892609637906374
FAM24B|FAM24B	92.851426747396	-0.189487542790349	0.444994586742598	-0.425819882838161	0.670239097669078	0.869411281468467
HSPA7|HSPA7	167.415414569933	-1.02616215403231	1.09867770384088	-0.933997432044847	0.350305217635753	0.666107441109474
PRR3|PRR3	122.492233377881	-0.51814093614258	0.314331436114151	-1.64839044591905	0.0992725753067032	0.363686996917604
C1RL|C1RL	382.546127035863	0.318289562426216	0.511321211880459	0.622484565534958	0.53362328961116	0.794732338850364
PAX8|PAX8	24.4855879140356	-0.411939064313413	1.32832103682626	-0.310120108688223	0.756469621079173	0.909532317139491
EVPL|EVPL	32.4749375850818	0.137547418123753	1.91604836134748	0.0717870283957869	0.942771396025987	0.98290035254691
CHMP4A|CHMP4A	677.220935800536	-0.895934427910939	0.142379674046756	-6.29257254526882	3.12247317612203e-10	1.52305320179301e-07
NOP2|NOP2	714.476671817846	0.196925324369162	0.357219437129192	0.551272702156858	0.581446748492764	0.823526186069523
CMTM8|CMTM8	32.3539217775082	-2.02892586013886	1.22235683303138	-1.65984744005335	0.0969451473218844	0.359949446515705
PDDC1|PDDC1	418.537092649595	0.643296691039076	0.490627363742686	1.31117165200851	0.189799777422334	0.502098536726136
IGFBP3|IGFBP3	403.174032612497	-1.5060079122541	1.76720607772739	-0.852197110022854	0.394104700385211	0.703929215837657
UBA2|UBA2	2649.56395388352	-0.365338285677556	0.303655368508394	-1.20313461761654	0.228924231152052	0.547442845528481
WDR60|WDR60	210.131163232456	-0.881635578433183	0.398295127549637	-2.21352338367059	0.0268615829222502	0.183652760772389
XCR1|XCR1	4.35981310486838	-2.30992275497948	2.36528392772139	-0.976594280249798	0.328770051905041	0.646855171847742
SLC39A9|SLC39A9	1534.48885576442	0.157629569671223	0.192300555584775	0.819704182298802	0.412384765224727	0.717941776653932
STRA6|STRA6	16.2604373031103	1.75841478941619	2.44146347289885	0.720229816638768	0.471383508582009	0.755275087106356
FAM96A|FAM96A	685.991054403905	0.326236477259163	0.357689274203651	0.912066703664754	0.361733604746141	0.67647238769971
RIMS2|RIMS2	341.984104958486	8.89657176373473	1.93852787880585	4.58934424467245	4.44640629433742e-06	0.000546725053068249
BCRP2|BCRP2	20.3400939383982	0.492178912254089	0.63979588784718	0.769274891575499	0.441730139458033	0.736590832274617
TUBB2A|TUBB2A	131.083669412491	-1.01732210273478	0.866849401000635	-1.17358574806703	0.240560992483833	0.560586577079442
C8orf33|C8orf33	485.347353132021	-0.127509602807911	0.373831578724431	-0.341088367234765	0.733037058300133	0.898442720891656
SLC41A2|SLC41A2	306.82863110611	0.522060453809556	0.736914171669701	0.708441327199164	0.478671235879131	0.761307559057995
EED|EED	525.742547974889	-0.00063696571061627	0.387003466895608	-0.00164589148445042	0.998686769188715	1
FAM117B|FAM117B	1019.35333912605	-0.965319519226147	0.513684770940827	-1.8792060303017	0.0602163665633834	0.285163331475751
CGRRF1|CGRRF1	379.633663467472	-0.717592668889928	0.474995582685749	-1.5107354574383	0.130855864700244	0.420156351732663
USP27X|USP27X	50.7087259625643	-1.22033698845853	0.515153896711235	-2.36887849679331	0.0178421138277432	0.148663280973465
FAM50B|FAM50B	31.7657757539927	-0.529060678774356	1.37786687069638	-0.383970824777119	0.701000071547193	0.8841976477419
TSNAXIP1|TSNAXIP1	5.33223937729767	1.01948583413805	1.88491594932081	0.540865408086445	0.588600355362821	0.826635839647423
ZNF394|ZNF394	2207.55855634338	-0.547191789953501	0.390126456513207	-1.40260108182378	0.160735829044959	0.46321439457386
NDUFB8|NDUFB8	1112.36549549985	-0.608352822134857	0.239238658581973	-2.54287006013457	0.0109946107691406	0.113784307737334
TMF1|TMF1	2964.37537850206	-0.298568612300829	0.32983796443196	-0.905197838020305	0.365360587038311	0.679385245824861
CD53|CD53	6462.72298242548	0.505270542308819	0.434854225089122	1.16193085672622	0.245263551954167	0.56646878867503
OSBPL11|OSBPL11	899.095445465113	0.520910562321336	0.27025197487299	1.92749955875863	0.0539174029941217	0.269529669735529
MAP2K6|MAP2K6	164.163219228356	-0.207484672458076	0.860970779802337	-0.240989215111006	0.80956347532855	0.929759007790717
ACTR6|ACTR6	590.554931844883	0.105471572984537	0.383356561450917	0.275126562554065	0.783219004795098	0.919979111040716
PTPN9|PTPN9	710.882044420856	0.783674113020831	0.325886356079845	2.40474661918287	0.016183682379513	0.140487918362633
ACTG1|ACTG1	32091.1421847916	-0.0966358562682976	0.43498302030098	-0.222160065469755	0.82418928044222	0.936663519884807
SAP30|SAP30	238.165875701565	-0.180757672107283	0.557180372755467	-0.324415002655905	0.745623862952765	0.904325844581529
CBX6|CBX6	1851.4661617674	0.0577530322211497	0.399564797009494	0.144539840980479	0.885074198188093	0.962115018581482
ZBED5|ZBED5	869.75446717201	0.471428462470125	0.318463765747921	1.48032056759413	0.13878771689039	0.430797073227771
SNORD85|SNORD85	4.42551753432092	-0.979677037864405	0.783205228186404	-1.25085610081147	0.210986982583132	0.528535549032903
NUTM2B-AS1|NUTM2B-AS1	370.345521728614	0.0467845575319298	0.371593651701321	0.125902467164682	0.899809129703811	0.966499399918426
EDA|EDA	25.2596198144901	-2.23426879970534	1.20059081858621	-1.860974417859	0.0627477894335692	0.290937061708282
MMGT1|MMGT1	1135.73135302712	-0.541590782154527	0.338463260419416	-1.60014644272882	0.109566100105507	0.381893111678485
SDHA|SDHA	1731.92464685432	-0.896103611067275	0.259108336245217	-3.45841289420814	0.000543367946182214	0.0171330271862141
ZNF503-AS2|ZNF503-AS2	15.0197385172132	-0.990110973223018	1.3184724060211	-0.750953124768827	0.452680866876416	0.743498854817497
CSNK1G2-AS1|CSNK1G2-AS1	41.7209470728665	-0.459580054757531	0.785170704305783	-0.585325015614119	0.558329197475186	0.80972693327029
SLC6A9|SLC6A9	7.64448238025115	3.70379712401115	1.60010774270986	2.31471733130832	0.0206284066521478	0.161619164004345
SLC16A14|SLC16A14	31.1266690911221	0.315842030305889	1.56832553862541	0.201388055303056	0.840395154370386	0.94278000232693
BOD1L1|BOD1L1	3521.89424674969	0.262049088382369	0.368926985963576	0.710300678325116	0.477517699269659	0.76039382165205
NRADDP|NRADDP	24.2148507999393	0.0962209843937272	0.741335524688356	0.129794109670081	0.896729323295357	0.96586517396204
MATN1-AS1|MATN1-AS1	94.3134283066947	-0.586378641573299	0.636857062812556	-0.920738224969464	0.357187114093798	0.672665027906471
RGS2|RGS2	7383.13774198354	-0.689822187136197	0.565014023455999	-1.22089392209558	0.222126186024685	0.540190633591656
MKKS|MKKS	349.259476078499	1.57646797887476	0.559855237619146	2.81584929986346	0.00486484805773675	0.0696166689368665
PSMD9|PSMD9	636.412594082234	-0.482688833590666	0.340870347982348	-1.4160481732945	0.156761400562412	0.456555143286506
FFAR2|FFAR2	175.404378955796	1.8422715368654	1.06804933330102	1.72489367244067	0.0845466361105346	0.336373845648811
L3MBTL2|L3MBTL2	773.763090221383	0.684109809414068	0.356302767280567	1.9200238455498	0.0548548874707613	0.271619426741827
LGI4|LGI4	7.51227458377436	-0.143239925701545	2.15488298817741	-0.0664722523159815	0.947001848281285	0.98461327386557
DRAM2|DRAM2	678.619554497245	-0.468957340258181	0.394311563696527	-1.18930658756714	0.234319044014203	0.553061623034768
PPM1B|PPM1B	1837.96703850269	-0.626453266995318	0.279148560218694	-2.24415725628151	0.024822285113838	0.177011717403276
SERPINB9|SERPINB9	1277.089097637	-0.278723904849657	0.675235025824484	-0.412780578894476	0.67976738171477	0.874459072167923
SYN1|SYN1	26.3809347958731	-1.51529373772429	0.749213454490469	-2.02251271469067	0.0431234114035686	0.238949327971997
NUP210L|NUP210L	73.4982652938541	0.148360862667883	0.565429184135588	0.262386284313734	0.79302364589305	0.923736042831749
PKHD1L1|PKHD1L1	101.508409490832	5.50923845986048	1.55023322838377	3.55381265153519	0.000379689588351329	0.0135892256862346
N4BP1|N4BP1	2381.0891882342	-0.874358822414903	0.342027806985704	-2.55639689100322	0.010576241016548	0.111317870921398
CTU1|CTU1	31.7307507057263	0.921497184530995	0.630493422904146	1.46154924231635	0.143864772241721	0.438034491120146
MPI|MPI	569.279271414534	0.0675649871298152	0.472356503756324	0.143038121826455	0.886260073870602	0.962197241491266
ZDHHC12|ZDHHC12	351.279712232012	-0.161064941926776	0.399205390977101	-0.403463844845759	0.686607027239766	0.877720199526048
LOC100128176|LOC100128176	91.5397057410635	6.24337945833722	1.2649908028192	4.93551371632349	7.9940061893794e-07	0.000131224686216428
SIGIRR|SIGIRR	1142.90300911812	0.036244857481506	0.494021835990357	0.0733669138507745	0.941514145539393	0.982598676831725
SCAMP1|SCAMP1	1096.0013793048	0.225724388697716	0.350079524167462	0.644780323083791	0.519069555081368	0.786014404861241
LOC101929295|LOC101929295	39.6795008045386	0.128568249556641	0.724489720305253	0.177460419317572	0.859146752558988	0.951745724462205
SMIM14|SMIM14	186.828442441218	1.07506349274031	0.609457689640968	1.7639673943135	0.0777374689072493	0.32266814227682
ZFAT|ZFAT	379.483939834236	0.708904193338122	0.418092701509449	1.69556701367603	0.0899679091537999	0.347074019883668
MED16|MED16	498.272168989788	0.179445950306532	0.467523840981456	0.383822031256902	0.70111035787758	0.884213633913552
ANXA2P1|ANXA2P1	33.9770674263515	2.3984548272157	0.728502946569853	3.2923062816819	0.000993693287489312	0.02558722745704
MRPL20|MRPL20	528.23312253856	0.462336921152599	0.298300046248613	1.54990563014285	0.121164168125248	0.403770188997509
FPR1|FPR1	1155.36841021129	-0.0433022095010327	0.913575590626257	-0.0473986060325331	0.962195539998258	0.989023479462954
RSPH4A|RSPH4A	30.5412077498001	0.895928124381219	0.939012423259869	0.954117434645775	0.340024201833578	0.65733135247456
IPO7|IPO7	2637.26263138752	0.096891737314708	0.285914079498562	0.338884106318364	0.734697038069416	0.899111462691633
MSTO1|MSTO1	271.739524719343	0.340424231592233	0.322080141991554	1.05695504692481	0.290532103884348	0.612549807839129
NSUN5P2|NSUN5P2	175.399173308238	1.16653212536877	0.615528808487323	1.89517063910551	0.0580697986105431	0.280047345163613
ABALON|ABALON	117.57626190125	0.45155116408739	0.452635209670088	0.997605034783998	0.318470918708424	0.639038025880374
CD3E|CD3E	3390.44056207958	-0.719188707162771	0.342437995846582	-2.10020125069585	0.0357111414076069	0.216268395214851
L1TD1|L1TD1	20.0822684250544	3.65226520497128	1.31648932829086	2.77424596347685	0.00553298279578441	0.0755851688985911
DDR1|DDR1	40.3798608067216	-0.159188880839157	0.653974519615166	-0.243417558428472	0.807681943141038	0.928705979343332
LOC730183|LOC730183	29.2252471173383	-0.26398208634227	0.572784268549573	-0.460875238439659	0.644888117872813	0.857709597536391
KCTD20|KCTD20	3416.93736941658	-0.437505773359926	0.295801059840497	-1.47905411020447	0.139125853586842	0.431689671471206
NOMO1|NOMO1	1545.02529844833	0.85916906732286	0.36186199234515	2.37430038384183	0.0175822402501523	0.147718506668603
GPATCH4|GPATCH4	239.719116841134	0.669991333598232	0.412098378615287	1.62580434276278	0.103991284236266	0.370893881797537
ATF5|ATF5	375.199337224621	0.330420345939973	0.82955485789504	0.398310422505874	0.690401378679551	0.879439718099249
KIF6|KIF6	179.10817479983	20.4850739504992	2.00618484254183	10.2109603841612	1.77103109614169e-24	1.51175214366654e-20
LPCAT1|LPCAT1	1335.52494393354	1.30127279542502	0.32862903149696	3.95970127623086	7.50435736898477e-05	0.00458141708677092
COL24A1|COL24A1	21.7628588556042	1.63896094567904	1.29026796194421	1.27024850187663	0.203996125840659	0.519486126296068
FAM71F2|FAM71F2	37.7437522349406	0.225415902631905	0.515282745291655	0.437460607194052	0.661777338658309	0.865161541499553
CREBZF|CREBZF	1587.6559126449	0.202201654280432	0.387696060071325	0.52154683811652	0.601985886000522	0.83445136779806
CFAP54|CFAP54	25.9499460678948	4.33807716401563	1.53053767697245	2.83434849679544	0.00459192254854026	0.06711755286702
SMAD1|SMAD1	69.3331937725209	0.649622053302212	0.751364320631967	0.864589967162427	0.387263881125587	0.698138223714469
ANKRD16|ANKRD16	61.1439483530569	-0.182586805552861	0.504991442228709	-0.361564157893527	0.717677752859371	0.891909972895
UBAC2|UBAC2	887.319386703901	-0.397451779822744	0.252273258869073	-1.57548121273138	0.115145411645067	0.392408291574342
UBL3|UBL3	2663.25349945202	-0.143851406750342	0.333859853833989	-0.430873628854675	0.666560259230893	0.868195045628611
CYB561D1|CYB561D1	373.695303333731	0.421487245204914	0.432590120080687	0.974333961039837	0.329890747498776	0.648024854530115
PRR14L|PRR14L	2329.95296192904	0.66328276852218	0.273335404795262	2.42662588485016	0.0152399621526803	0.135883864603605
CRIP3|CRIP3	4.47353846095592	3.46711596991761	2.13782353249951	1.62179708344024	0.104846803140564	0.372315304659902
LRRC46|LRRC46	8.17023808033266	1.74450560254259	1.48363635835199	1.17583098629396	0.239662421449237	0.559561933668131
MATN4|MATN4	14.8446653018913	2.81081748979388	5.32167576687152	0.528182777930924	0.59737248150204	0.831906599576052
NOP9|NOP9	1090.30892431617	0.60111353389463	0.264521103478225	2.2724596487407	0.0230587625160172	0.171454352645229
EPN1|EPN1	582.487725875301	-0.211931617213617	0.452415724505004	-0.468444410161683	0.639466815672022	0.854682264321868
POLR3H|POLR3H	424.992199407316	0.540974996780364	0.311067491781772	1.73909203331309	0.0820185757568807	0.331256476300324
PABPC1|PABPC1	17600.3051040558	-0.903800380619517	0.319238070800346	-2.83111716078738	0.0046385726461292	0.0675456739256604
CCNF|CCNF	364.439081543456	1.91822875685369	0.499631755506119	3.83928510490803	0.000123393077154259	0.006347432027744
TMEM229B|TMEM229B	511.255218491854	1.37025337573265	0.600754759225556	2.28088642610017	0.0225551683787792	0.169416110453357
CNOT4|CNOT4	760.113420986191	-0.175567873914429	0.307356222253547	-0.571219520552271	0.567850847574419	0.814925157178083
AK9|AK9	261.863347611745	0.388619042461785	0.560640705932442	0.693169508295771	0.488203181112941	0.767953995020744
SPTA1|SPTA1	14.8597957144592	4.65562429176967	2.17250158738236	2.14297854547449	0.032114821155404	0.204958589444881
SSBP1|SSBP1	1010.38560035946	-0.271150967747852	0.238912179581536	-1.13493991065162	0.256400496182129	0.578402983394988
ORM2|ORM2	20.6303414966101	-0.157208878359291	1.13186173434786	-0.138894065934537	0.889533860214899	0.962932152149723
MIR8075|MIR8075	4.55412661637451	0.637527054020718	1.09291150893719	0.583329069926883	0.559671796704234	0.810126248359601
MIR6859-4|MIR6859-4	8.43326960083473	-0.298426129773558	0.574956004979709	-0.519041678300394	0.603731677318895	0.835300837687504
USP21|USP21	235.438852979909	0.286889562605211	0.338621746512651	0.847227224948747	0.396868481450498	0.706281246771647
GALNT7|GALNT7	675.6545317148	1.08932985974821	0.450662701703549	2.41717332193332	0.0156415671890263	0.13807282060551
LYAR|LYAR	392.395675161698	-0.115289829305084	0.425275627519583	-0.271094372319221	0.786318449808877	0.921211858827506
ADAMTSL5|ADAMTSL5	19.1441956218488	1.35768626415464	0.969046926707118	1.40105316547275	0.161198175317173	0.463460448405126
CTNS|CTNS	242.248896176608	1.48712110632934	0.400630678049378	3.71195015212003	0.000205668497794724	0.00916755246566979
CD1C|CD1C	70.9734252491641	-0.256310861176166	1.05050846180557	-0.243987431320287	0.807240554164007	0.928705979343332
ISLR|ISLR	5.04689447960009	1.28288479389139	3.2015122782066	0.400712126773421	0.688632081466589	0.878517926677448
KIAA0922|KIAA0922	2019.56868543615	-0.46984582723393	0.415101144443382	-1.13188275562082	0.257683729455969	0.57975443190199
ZNF587B|ZNF587B	327.564456935913	-0.0213434310825943	0.403502326595949	-0.0528954349846086	0.957815221660835	0.988025466114428
LY6E|LY6E	2522.18917809286	0.565938208051074	0.687612404806517	0.823048281408361	0.410480537806767	0.716609442830262
MATR3|MATR3	12788.8552603724	-0.373435871654428	0.277493413056062	-1.34574679644372	0.178384188872672	0.487277736354756
CLTCL1|CLTCL1	161.132232527516	0.932968869115606	1.07176321369415	0.870499059115724	0.384027733169251	0.695167157317937
PTRHD1|PTRHD1	241.658343083432	-1.09660784535571	0.385939165168232	-2.84140078107308	0.00449158260209211	0.0665050287796327
CTNNAL1|CTNNAL1	254.014542590819	-1.0473383579214	0.683442044234707	-1.53244648431627	0.125412294026681	0.412242853714467
SNORD83A|SNORD83A	11.0265229187757	-0.680979283452632	0.693085098895069	-0.98253343570402	0.325837119170231	0.645174124156133
SNORD65|SNORD65	11.9190366282394	0.537353943671542	0.828460145469924	0.648617735698971	0.516585488880948	0.78481111394947
MGAT4A|MGAT4A	2424.61547797047	-0.468506118701013	0.61968172819553	-0.756043138572554	0.449623331967389	0.740989408237937
CXorf40B|CXorf40B	310.152543897461	0.370587148738869	0.421618501086398	0.878963204375437	0.379421226916544	0.691449545412666
PAQR6|PAQR6	58.6884605841017	0.940081896270972	0.716954673162071	1.31121524339163	0.189785053787495	0.502098536726136
PDCD5|PDCD5	484.421667272153	-0.151018248539081	0.4418059705033	-0.341820298098379	0.732486133038919	0.898293282179296
VPS37A|VPS37A	703.126270970833	-0.0983542978975304	0.21921603000073	-0.448663803907055	0.653674199445784	0.861606387657383
SNORD33|SNORD33	18.2032888101214	-0.966758886992622	0.67985856547039	-1.42200001013994	0.155026247998748	0.454119441632571
CORO7|CORO7	4948.09760897032	-0.0527605468041733	0.561296726533579	-0.0939976028900233	0.925111060923344	0.977236884721502
UQCC2|UQCC2	196.394688259767	1.03720100693496	0.476665981595075	2.17594929569792	0.0295590521524591	0.194313491854749
CYB5A|CYB5A	448.564413618847	0.671881360019054	1.04069454697972	0.645608610104639	0.518532859836788	0.78584686469101
KIFC3|KIFC3	66.6836683194485	3.50200484512948	1.02124040134022	3.42916794178299	0.000605434772419983	0.018457111490632
C19orf73|C19orf73	12.2722702290111	-1.20196312541171	0.806107586366411	-1.49107035554602	0.135943024362984	0.427406871441044
FAM110B|FAM110B	40.7011060588788	2.39169247346207	1.13697726705956	2.10355346826541	0.035417416571514	0.215361799024567
KCNH8|KCNH8	11.5179283797259	2.7749171275782	1.6204922569732	1.71239147588478	0.0868245488892562	0.341222076113578
HIST2H3C|HIST2H3C	2032.47740439917	-0.0515691058404167	0.736071080368135	-0.0700599537406431	0.944145940630248	0.983658486528523
MDK|MDK	27.7625251974998	-0.383571115535473	0.62571325963264	-0.613014203599696	0.539866948125795	0.798597048644275
SLC25A5-AS1|SLC25A5-AS1	49.8985550494658	0.331154944425321	0.395223903237765	0.837891994164381	0.402091365479666	0.710545308198312
ATP6AP1L|ATP6AP1L	25.4144509808515	1.55225061085446	0.806695759129526	1.92420822012184	0.0543284891879417	0.270485846432354
DBIL5P2|DBIL5P2	4.67032259899435	1.29145590873691	1.26956274012068	1.01724465276458	0.309037058843838	0.630722630012804
ZBED3-AS1|ZBED3-AS1	5.85000418343694	-0.00302632301207235	2.80261497271699	-0.00107982118183665	0.999138427518019	1
METTL25|METTL25	337.148543841338	-0.895807127604135	0.360404746533192	-2.48555862879468	0.0129348278999853	0.124473630036798
MUC16|MUC16	367.083157655546	6.92685586648557	1.85844730587327	3.7272274788715	0.000193597712640262	0.0087377272732188
POU3F1|POU3F1	37.3385121210267	-0.527352402772733	1.75823658114959	-0.299932562219775	0.764228596037767	0.911946887683906
FYTTD1|FYTTD1	2058.1087829782	-0.868818984096924	0.365629015190969	-2.37623095542113	0.0174905113709788	0.147310315799384
PXDC1|PXDC1	19.8299587332544	-0.0350135478373104	1.17201614037372	-0.0298746293938799	0.976167039626599	0.993923999553009
POTEE|POTEE	40.0692958622573	3.20048795522118	2.5673783980376	1.24659768021243	0.212545052755654	0.530489036930232
SOCS6|SOCS6	201.013463089239	-0.216840364273145	0.972810215057623	-0.222900994373605	0.823612562459804	0.936444466620964
ORC4|ORC4	786.130694632385	-0.0898660245350606	0.335863484523992	-0.267567117819982	0.78903254449142	0.921941724855374
ZNF417|ZNF417	657.408530409229	-0.201175467878668	0.334142996426688	-0.602063996642247	0.547131538939952	0.803794898141849
ZC3H12D|ZC3H12D	3195.27642279947	1.15957962534725	0.63321045346211	1.83127050257491	0.0670601781167431	0.300786105983528
ZC3H7A|ZC3H7A	3222.35092102616	-0.355422923048583	0.583277923971489	-0.609354320541637	0.542289608809229	0.800522380531326
ZBTB2|ZBTB2	824.740257089258	-0.716212158548393	0.26595891726323	-2.69294282710412	0.00708244129063054	0.0886674373893095
HRH1|HRH1	21.3567761815476	2.8753624215006	1.62377610869849	1.77078749102012	0.0765960468516043	0.32049200933112
IDO1|IDO1	42.5861891246746	-3.4142372355313	1.58180088117448	-2.15844944592283	0.030892904900445	0.200153196379657
NRG1|NRG1	36.6016371721	1.04332963141796	1.48676992463987	0.701742491643875	0.482839768649887	0.764447791003512
CPNE2|CPNE2	351.593860048385	0.257773523541036	0.762065965049929	0.338256181699634	0.7351701414305	0.8992494557929
DNAJA2|DNAJA2	2201.17190764994	-0.574872570203149	0.254554077344396	-2.25835145207823	0.0239237568811792	0.174094790057754
HNRNPL|HNRNPL	4624.47169363758	-0.684841700253867	0.328485084700174	-2.08484869527321	0.0370830369402625	0.220406068205647
NAPA-AS1|NAPA-AS1	37.0500654884479	-0.198158485413443	0.379532263459998	-0.522112359057265	0.601592101857804	0.834352807322533
CNNM4|CNNM4	275.03899167655	-0.939069242824898	0.391906408902783	-2.39615689228967	0.0165679968660313	0.142278089787166
UNC13B|UNC13B	21.7735424846941	1.38582687083153	1.40632652155388	0.985423263795309	0.324416207117229	0.643843989090103
SBDS|SBDS	2295.55123912466	-0.725748927464894	0.597082939861961	-1.21549097958263	0.22417888710775	0.542779025376226
LMLN|LMLN	75.2694884770683	1.29467915810007	0.612075213995217	2.1152288615794	0.0344104462028532	0.212228731969398
UNC50|UNC50	314.458826286583	0.433455866241493	0.366488694967087	1.18272643111248	0.236917585506455	0.556655343102721
HERC2|HERC2	1256.24750272857	0.387686284517204	0.416712078180824	0.93034568666612	0.352192130155265	0.668217831297032
NPHP4|NPHP4	252.403295216699	0.95613777838723	0.588784174319582	1.62391895042385	0.104393107528566	0.37152368808165
KIF13B|KIF13B	1043.94975546061	0.24818371924483	0.33059596456101	0.750716118311931	0.452823520533906	0.743498854817497
INAFM2|INAFM2	357.628517865191	-0.0591573820969782	0.598722728457532	-0.0988059735921221	0.921292325465139	0.975882768526454
CCDC176|CCDC176	62.8736816399092	0.602438780085044	0.546296170638313	1.10276954601591	0.270127256419902	0.59212170667579
IFNLR1|IFNLR1	293.026505787387	0.558954557021291	0.827911587184525	0.675137980520511	0.499588105259077	0.774669225146746
TLL1|TLL1	1096.56303683823	11.3725160753851	1.48663569791445	7.64983384385237	2.01239169346059e-14	3.43555509907592e-11
MGMT|MGMT	182.864472103628	-0.707174399403963	0.722000746416715	-0.979464914563683	0.327350316235075	0.64634959060437
SPATC1L|SPATC1L	11.7898475679119	-1.18047259944176	2.11580918215252	-0.557929613596254	0.57689244879236	0.820725657148598
PCNXL2|PCNXL2	1051.05763832648	-0.735472749317443	0.335168757557007	-2.19433563759996	0.0282112892366553	0.189257410250641
KDELR1|KDELR1	463.047633361371	-0.563230096173716	0.327303725692678	-1.72081785803612	0.0852838808227757	0.337419794532196
SNORA11E|SNORA11E	7.88156719137818	-0.596697701017388	2.12563189480485	-0.28071544394669	0.778928662311052	0.918320621795033
RNMTL1|RNMTL1	292.47693977544	-0.545129010842959	0.366381711867618	-1.48787178285778	0.136784710417764	0.428239240097573
LOC101927954|LOC101927954	142.769993390304	-0.260673446281811	0.469708029495978	-0.554969108281005	0.578915790424553	0.822575977871658
CR2|CR2	58.4069033759653	1.67267025115293	1.1337572348181	1.47533369559603	0.140122851633422	0.432651847107889
CARD6|CARD6	161.480158707423	0.281872749168557	0.662608553143062	0.425398597454716	0.670546128295548	0.869521169199082
AOC2|AOC2	30.4562455885838	0.204145587341431	0.833847901038322	0.244823530870828	0.806593073269903	0.928650743465593
RHAG|RHAG	4.69519317826669	1.17598220248184	3.12844240809105	0.375900224162802	0.706991073858374	0.887138674720976
WIBG|WIBG	402.752256326798	0.436256828013046	0.447749496175827	0.974332370530981	0.329891536963671	0.648024854530115
KIAA0232|KIAA0232	1791.80165139333	0.358411129358558	0.395090293728428	0.907162577891417	0.36432082987467	0.678907605894167
LACTB2|LACTB2	95.1979825560668	0.324724125357017	0.526107525289906	0.617220073364435	0.537089577242492	0.796694124200945
NICN1|NICN1	251.487212879895	0.168766195055266	0.418709545540359	0.403062688330805	0.686902108174403	0.877720199526048
ICA1L|ICA1L	406.531550670921	-0.387516783390317	0.620288928106059	-0.624735934870754	0.532144384135067	0.793845589475171
CAB39L|CAB39L	130.971353864612	0.342722691891315	0.486322486515736	0.704723103278149	0.480982570831668	0.762711748744986
KRTAP5-1|KRTAP5-1	5.59668123706578	0.0570410109730174	1.39556927287589	0.040872934136384	0.967397194840538	0.991428489904875
SUV420H1|SUV420H1	1052.83279719761	0.662745866313038	0.415747457800174	1.59410684029145	0.110912107113876	0.384777787573276
MBNL3|MBNL3	1628.03491828474	0.101357719836637	0.653870030289122	0.155012028601188	0.87681183447867	0.959183976983848
SOWAHD|SOWAHD	22.7577247455815	-0.757599459364281	0.825018412490259	-0.918281880615878	0.358471310874458	0.6737666210777
TMEM251|TMEM251	116.692214776628	0.473170507810087	0.366791548964628	1.29002565393271	0.197041751086152	0.510687228562743
CLDN23|CLDN23	6.09122639286034	0.491617678481462	1.30907904856382	0.375544684655073	0.70725542051561	0.887138674720976
THUMPD3|THUMPD3	1131.07392600539	0.0887283217901871	0.377328393900703	0.235148807310633	0.814093237796674	0.931992439241628
FAM95B1|FAM95B1	25.6153333177222	4.83798976033814	1.72101637701238	2.81112360402793	0.00493688162127746	0.0701938199033573
BANF1|BANF1	280.77663237997	0.543713229146263	0.406501903534122	1.33754165581816	0.181045894525485	0.48998343553251
C8orf76|C8orf76	283.588371742161	-0.467090007029087	0.282603085760858	-1.65281283384267	0.098368961332739	0.362242214812882
MYCBP2-AS1|MYCBP2-AS1	8.32316318987695	4.05398365047036	1.41694450525108	2.86107440019466	0.00422207957866573	0.0640136257255607
MAP2K3|MAP2K3	808.231613375294	-0.120333415813415	0.384801141470993	-0.312715849421372	0.754496552989483	0.908247437077737
FOXK1|FOXK1	2469.7717665453	-0.468211812513032	0.440203820707685	-1.06362505386782	0.287498588065865	0.609332823769143
PCDHGB5|PCDHGB5	27.1773363959939	1.22015355923525	1.24314093242543	0.98150863462815	0.326341978476725	0.645619364121571
LOC283038|LOC283038	8.18373105817183	3.23006749612104	1.90827477710589	1.69266372687679	0.0905194934155202	0.348262976623907
ARRDC5|ARRDC5	40.1539503814631	-0.533507444281091	1.16760855518186	-0.456923205909531	0.647726243650064	0.858672342878855
FAAP20|FAAP20	156.623251214695	-0.814794293757861	0.477054492177592	-1.70796902055906	0.0876420909071903	0.342463453348141
TMEM65|TMEM65	351.21510041488	0.532316322023154	0.588748466793523	0.904148973707374	0.365916412820885	0.679967980085984
DNAJC2|DNAJC2	801.918543578053	0.094577476678892	0.330792530557589	0.285911766264706	0.774945701591983	0.916911788137685
APITD1-CORT|APITD1-CORT	4.97431897718002	-0.157067228362565	2.31398366132828	-0.0678774146021433	0.945883217815568	0.984256337691768
CORIN|CORIN	9.70797143111293	4.00759132546121	1.51099339424845	2.65228911040643	0.00799480533159822	0.0947828587646145
[truncated: 15,073 more rows]

## Sheet: DGE Acute vs Donor
	baseMean	log2FoldChange	lfcSE	stat	pvalue	padj
DNALI1|DNALI1	16.9994863741971	1.80283537595144	0.851852188013944	2.11637112790033	0.0343132556419952	0.0964898654644912
C2orf49|C2orf49	600.3667976774	-0.420858710446049	0.182059031913616	-2.31166070709274	0.0207963883463311	0.0663554280029525
SMA5|SMA5	527.987455237344	0.398111575413034	0.447118387197926	0.890394103244075	0.373254307557756	0.533746658054819
TMX1|TMX1	1497.28269651221	0.805957729379275	0.305094989903131	2.64166163343151	0.00825004314119639	0.0328969766646796
ZNF14|ZNF14	734.973227202806	-0.4844679108409	0.424110198662679	-1.1423161064472	0.253322648711804	0.40845190361082
MGAT5B|MGAT5B	14.3098920531015	1.62000410187914	1.89014787908559	0.857077967181521	0.391401796872557	0.550184214268142
KIF21A|KIF21A	428.253767323621	0.645480484330591	0.42823242075902	1.50731344251449	0.131730333565379	0.25833182239791
ZNF136|ZNF136	740.713800523486	-0.871968019506586	0.265825652350344	-3.28022525966523	0.00103724234033037	0.00667130225715786
FANCE|FANCE	113.20050468552	1.31264782735913	0.46426391069116	2.82737425229749	0.00469314434220194	0.0214806353397814
CAPS|CAPS	289.852669456248	0.205540303268924	0.341065413176638	0.602641884307613	0.54674695056543	0.690542737664868
A1BG-AS1|A1BG-AS1	29.6322813790614	2.44676559331101	1.11614348167433	2.1921604466485	0.0283679233574498	0.0838884803889638
ASGR1|ASGR1	38.6754543377536	-0.765880082554656	1.01066288307103	-0.757799752403525	0.448570870630541	0.604197646145316
SNORD116-16|SNORD116-16	5.54621260006241	-1.91336266348425	0.77557499590925	-2.46702468952226	0.0136240963331812	0.0482373346142297
CDR2|CDR2	1356.8417078931	-0.907398021328764	0.433903363897169	-2.09124449549971	0.0365061525279318	0.10125234546822
BTN2A1|BTN2A1	648.916183811125	0.0155483376299722	0.251622598694294	0.061792294136754	0.950728240150177	0.972247740023282
ATG9A|ATG9A	682.07507911492	-0.772894475953355	0.296061275003344	-2.6105895678002	0.00903862993746484	0.035289086101836
UAP1L1|UAP1L1	169.512113106719	-0.307870265006013	0.601397761826883	-0.5119245274056	0.608703831450354	0.741963589878967
LIME1|LIME1	1374.90060102202	0.270273040078224	0.474804276556724	0.56923042487789	0.569199775808975	0.709294930295576
FCER1A|FCER1A	90.7682220465644	-2.73161461062372	1.40185281406264	-1.94857447459649	0.0513462628917319	0.130604095064665
RSPH14|RSPH14	3.95314703002181	3.04776656323789	2.14938802747365	1.4179694519003	0.156199683655408	0.291935726844715
MIR3687-2|MIR3687-2	44.0629098704951	-0.840088640495689	0.873739153334089	-0.961486774731344	0.33630747206903	0.497215524731116
MIR374B|MIR374B	7.16516359188365	3.23575579757787	1.26783170398893	2.55219662625358	0.0107046088165057	0.0401978809980282
ZNF708|ZNF708	673.696836504569	0.349493264793007	0.370387123860394	0.943589132231111	0.34537964795205	0.506527927021606
URM1|URM1	594.126211391608	-0.288504598443004	0.253883950157492	-1.13636406816593	0.255804227334994	0.411356096291338
DUOX1|DUOX1	50.7850547279654	-0.166891131746371	0.573546811057054	-0.290980838057122	0.771065974734515	0.860869825205059
TCHP|TCHP	369.251430247101	0.799615273937325	0.33100077162863	2.41575048300632	0.0157028178347413	0.0536367631203036
MTF1|MTF1	684.934182286515	-0.384897179761452	0.27603753864122	-1.39436535210424	0.163207305349007	0.301053517589073
DEFA3|DEFA3	19.5462573530702	-0.444438863443134	1.17415437419234	-0.378518253827438	0.705045636147573	0.813454613183217
TNFAIP8|TNFAIP8	3845.46709129821	-0.200950328913688	0.291445471026483	-0.689495459325316	0.49051152969139	0.641925403691576
ZNF385D-AS1|ZNF385D-AS1	72.341968922525	20.1464220230549	2.80604726721101	7.17964456923737	6.9892881864384e-13	1.82900283243022e-10
CXorf65|CXorf65	123.398156736304	-0.51372334644634	0.564477133532956	-0.910087080465142	0.362776587448474	0.523244645256178
CCDC159|CCDC159	158.9128085812	-0.192821625349488	0.393099268717548	-0.490516367477741	0.62376855067048	0.753671972910587
BEND5|BEND5	13.3688334571521	-3.40654380031738	1.33745137605009	-2.54704123179263	0.0108640596005691	0.0406746865207727
OSGEPL1|OSGEPL1	157.681041630962	1.28075541116296	0.434266895636701	2.94923565215622	0.00318560969682512	0.0158045542768633
CDO1|CDO1	7.78831330242001	-3.06975795183193	2.13498120047848	-1.43783839930017	0.150479911302084	0.283777394284111
CASP6|CASP6	225.621630509817	0.932558346753983	0.473021770179804	1.97149138907391	0.0486676969797605	0.125555816999067
NISCH|NISCH	2133.92259371809	0.236275693236671	0.317611905853988	0.743913212577401	0.456928981482634	0.611615033305304
GGT1|GGT1	492.137350594127	1.44764420500294	0.292064515035444	4.95659051503486	7.17409532420244e-07	2.1474014605169e-05
EMB|EMB	7445.39257523906	-0.575553657062903	0.366697249007232	-1.56956088059322	0.116517305455887	0.23721527131422
CCDC92|CCDC92	309.187166107155	0.909856622106942	0.402480930688726	2.2606204486508	0.0237827703838338	0.073645940151847
PPP4R3B|PPP4R3B	3161.00210969267	0.976456441054861	0.283918813131044	3.43921006954962	0.000583414329700925	0.004286811718383
SLC7A11-AS1|SLC7A11-AS1	4.2707963219307	-0.680646563518095	1.96445244297721	-0.346481568414324	0.728980833673442	0.830596630932965
LOC101241902|LOC101241902	67.0075630603026	4.07466251298228	1.01338147538416	4.02085750722611	5.79866741367943e-05	0.000723101250099868
CCAT2|CCAT2	5.95268183739767	-0.921487535645876	1.28843173843469	-0.715200897461116	0.474484914576684	0.628524025934799
PSMA3|PSMA3	818.509879206035	-0.0647286155227933	0.256903760853934	-0.251956667771772	0.801074557548391	0.879091207203852
SOX12|SOX12	137.675740445814	-0.174478848785214	0.703087957554025	-0.24816076980213	0.804010018238152	0.880827349328196
AURKAPS1|AURKAPS1	102.745199124573	1.07787740387053	0.458083094689181	2.35301720663124	0.018621772366967	0.0610614428483321
IFIH1|IFIH1	1086.84752924314	0.180871192543925	0.458542482895127	0.394448059429407	0.693250267595573	0.806030105242039
ADGRL4|ADGRL4	23.6239716300411	3.51812266676519	2.12377183586229	1.65654455311899	0.0976115903486178	0.208895086027909
SPNS3|SPNS3	41.1522587650261	-1.72895203292151	0.731980379744037	-2.36201963982436	0.0181756792756849	0.0600026708229304
PCM1|PCM1	6567.04550587396	0.352758923983427	0.234147038628769	1.50657008540139	0.131920890020428	0.258547838668474
SYS1|SYS1	957.427899716301	-1.03277347911078	0.31917318271703	-3.23577773771304	0.00121311803760098	0.00754600166318989
C1orf228|C1orf228	243.151836225328	-0.199379662336193	1.06690521848944	-0.186876639912288	0.851757355178905	0.91068308305711
NRL|NRL	24.1732285061856	-1.03160093744673	0.407095647565877	-2.53405052010485	0.0112752474733101	0.0417858621749198
TMEM63A|TMEM63A	1909.00286825717	0.802041480507331	0.437389725635038	1.83369986421803	0.0666985587964727	0.158759955386717
MEGF10|MEGF10	14.5553927252951	3.53071985153745	1.78687402450664	1.97591984835768	0.0481638558045918	0.124571018268718
SIRT2|SIRT2	756.934222383785	-0.0292566754729016	0.31285761324363	-0.0935143472123809	0.9254949522132	0.957158201920252
LYPD2|LYPD2	7.58347088046925	4.05942150036416	2.2449786531398	1.80822276180074	0.0705718373912373	0.165442554047734
SLC25A26|SLC25A26	473.965776603653	-0.641036801279707	0.292874500047232	-2.1887764253164	0.0286130940076827	0.0843573864531195
TRIM38|TRIM38	1787.33533547355	0.047824035783333	0.297635114400079	0.160680086016492	0.872345374674618	0.924103163202832
AKNA|AKNA	7492.16373713182	-0.21538713716984	0.247968355579018	-0.868607353816985	0.385061930829175	0.544239486757592
KLHL21|KLHL21	713.123671007797	-1.72011233379735	0.344592288070167	-4.99173194916972	5.9840264107566e-07	1.88362540502326e-05
KIR3DL2|KIR3DL2	901.34060364784	6.2767354370118	1.09914711277983	5.71055081165379	1.1261110865842e-08	6.73860262152926e-07
CDK20|CDK20	38.1403956246432	-0.369977583332679	0.681347269381915	-0.54300882965056	0.587123723086866	0.723836902012421
ST8SIA4|ST8SIA4	1810.25822073583	0.867608718170891	0.363165621130937	2.3890166571083	0.0168935364094999	0.0567096254772662
MVK|MVK	130.348184874357	0.831366111198157	0.597581388523226	1.39121821255624	0.164159266094322	0.302078548743886
CDC45|CDC45	129.494066717119	3.36694633578649	0.930036571368492	3.62023004195656	0.0002943412083721	0.00253404238690742
PAM|PAM	362.925468079193	0.407789844991464	0.551448045866455	0.739489146889132	0.459610027632374	0.614109328949734
C18orf8|C18orf8	828.457732772674	-0.309034745199195	0.211313071582418	-1.46244973339788	0.14361800940622	0.274589553764066
ABHD11-AS1|ABHD11-AS1	4.98371566667367	0.606378722142632	1.35141702593966	0.448698448002021	0.653649204376854	0.776283285869908
RWDD4|RWDD4	321.25505355985	0.384955644037832	0.282237209422058	1.36394363034595	0.172585307587014	0.312870425692647
AKR7A2|AKR7A2	305.922572640136	0.563576153944078	0.352602721433298	1.59833183264495	0.109969146567296	0.228068257246794
SLC37A1|SLC37A1	312.912301740877	-0.674601784564135	0.381765985538616	-1.76705576221614	0.0772188901213904	0.176455498474134
CHCHD6|CHCHD6	71.8095871127451	0.063714979877596	0.528826841280372	0.120483634535895	0.904100042952028	0.944333733651728
CALR|CALR	7636.22557647	0.225222775056319	0.32941794908904	0.683699159924774	0.494165154065562	0.644993497076714
PALLD|PALLD	396.167530412542	2.16120237903406	0.845208839191173	2.55700399572517	0.0105578004774339	0.0397829176382652
PROB1|PROB1	37.4706127168569	-0.359362572215557	0.681384903962115	-0.527400255165526	0.59791566636076	0.73207090630609
PDXK|PDXK	1272.24978451748	0.265209945726918	0.277334905722101	0.956280440200583	0.338930569206743	0.499871271021351
PCYOX1|PCYOX1	507.832362784817	0.202044319367292	0.315588789392684	0.640213867406709	0.522033568455062	0.669015041713612
ZNF124|ZNF124	863.036023307475	-0.360583554691204	0.376503461840544	-0.957716438856857	0.338205765080712	0.499121646450858
C10orf12|C10orf12	740.126250273325	-0.533288948290435	0.286270791989388	-1.86288284803503	0.0624787504766603	0.151303858025868
CEACAM21|CEACAM21	430.015127692124	1.16339253379317	0.419057806291941	2.77621014648914	0.00549966485500251	0.0242879016921102
BAZ2A|BAZ2A	3202.63116624045	-1.06140695615445	0.268108970822783	-3.95886401300624	7.53070973963996e-05	0.000885310037745108
SNORD13|SNORD13	297.017893810663	-1.79219763810199	0.580493252111216	-3.08737032098802	0.00201935857679822	0.0111830113477584
CLEC5A|CLEC5A	97.6829877064485	1.98105358878004	1.10293794043128	1.79616052377834	0.0724689910037851	0.168648635422002
NUB1|NUB1	1440.15513902053	0.00631771205226845	0.254911505884513	0.0247839422953732	0.980227299317198	0.989596662574333
SLCO4C1|SLCO4C1	70.8316617265765	0.71545928044854	1.03679431205479	0.690068678164907	0.490150999193573	0.641725519709659
YIPF5|YIPF5	983.533930778525	-1.49462774194265	0.34258305872316	-4.36281860379574	1.28397400784835e-05	0.000220921651419088
GOLGA8M|GOLGA8M	18.4453130634187	-0.736324096917765	0.941921902478425	-0.781725209893005	0.434376082714955	0.590172330064543
ZNF614|ZNF614	327.841788538681	-0.143288476910376	0.346195885610657	-0.413894222508244	0.678951575247333	0.794610371057439
KLHL41|KLHL41	3.7195062208869	2.88319903676516	1.96116684688556	1.47014469541122	0.141522569406766	0.271716514389929
PTEN|PTEN	5202.97965253247	0.48400784185957	0.287108090626195	1.68580356201014	0.0918336414900829	0.200064517426146
LINC00998|LINC00998	307.351390967596	1.82018869737042	0.487448111876359	3.73411785382423	0.000188374275128628	0.00179498161186426
LEAP2|LEAP2	21.0416385679308	0.412082562911913	0.58198500024691	0.708063889511045	0.478905582957247	0.632706773113511
SIRPG-AS1|SIRPG-AS1	102.7970452211	2.5835619591572	0.735322456424	3.51350885123448	0.000442229679644586	0.00348790507116893
SNORD27|SNORD27	39.8659875930839	-1.14397439610977	0.519881560216817	-2.20045195608144	0.0277748450484829	0.0825243786197342
ARMT1|ARMT1	464.557797665457	1.26761434598536	0.452403098019227	2.80195770439106	0.0050793532400053	0.0228701336304604
AMIGO1|AMIGO1	116.765674108891	-1.51816948676493	0.520649631208417	-2.9159138809746	0.00354648377379606	0.0172484049947202
ARSJ|ARSJ	4.18509272762989	-1.49460134541966	2.10147676103351	-0.711214786255646	0.476951147192855	0.630782533291559
DSE|DSE	564.618120077059	-1.18139261490202	0.612945045710828	-1.92740380751747	0.0539293254925982	0.135277711528078
DNAJC1|DNAJC1	900.945202667778	0.68919493929077	0.454190438165578	1.51741402147158	0.129162186031599	0.255181474004524
LOC102724699|LOC102724699	4.54895353605801	3.08963476339241	1.30804539714577	2.36202410874589	0.0181754601736862	0.0600026708229304
SAMD10|SAMD10	151.384493853404	0.857324658832573	0.430907003966933	1.98958162884343	0.0466370415375807	0.121336585439739
AMY2B|AMY2B	375.647781707123	0.669904409878097	0.340847071806318	1.96541048842796	0.0493667465278877	0.126692436283038
TSR2|TSR2	505.408212092738	-0.67279333361639	0.301621356191113	-2.23058918013118	0.025708354166835	0.0780104834903284
MIR6871|MIR6871	4.34854618344675	-0.206218648359985	0.86632690665478	-0.23803791245071	0.811851689291175	0.88550756898112
DICER1|DICER1	4816.53890338527	0.941690749779158	0.306322278510998	3.07418302826886	0.00211079891206947	0.011550760713269
PCMTD1|PCMTD1	2155.93566439929	0.299206770271156	0.319777754895426	0.935670995529389	0.349442608578478	0.510422318008178
IPP|IPP	254.190090430588	1.63548532425079	0.392755489663829	4.16413103646405	3.12540589927234e-05	0.000452499930899603
SLC9A3R2|SLC9A3R2	12.2216855463884	-0.578610086587569	1.0862019926975	-0.53269105606282	0.594247458421311	0.728801111394855
HDDC2|HDDC2	377.020665715157	0.753231998940772	0.347818748315739	2.16558768780633	0.0303427080650335	0.0883425274832667
PPP2R1A|PPP2R1A	2212.33130665933	-0.11664751682899	0.25129105324907	-0.464192876430715	0.642509564465198	0.766856378064556
MIR6891|MIR6891	181.435675666571	-0.686492541012607	0.748698065038323	-0.916915073070835	0.359187144800475	0.519606287936199
TTC25|TTC25	26.8858552824415	-1.85804660515863	0.924672592000743	-2.00941027260072	0.0444936416993031	0.117203578713023
SMYD4|SMYD4	306.601454500334	1.19213166354418	0.326644403289175	3.64963137754667	0.000262616899824298	0.00232033666902228
GPR108|GPR108	718.678506837699	0.129533360151005	0.329664951524974	0.392924269176344	0.694375416049717	0.806771775069159
COPS2|COPS2	2527.74639071298	-0.659560079090199	0.3240650678006	-2.03527052010441	0.041823660728453	0.111806534607027
TMEM161B-AS1|TMEM161B-AS1	52.3433991653186	4.29382677940422	0.822189727017849	5.2224281553338	1.76592079626414e-07	6.77503048597357e-06
CCDC181|CCDC181	25.8242846811941	4.13960885311533	1.13214710527145	3.65642312190764	0.000255759067399008	0.00227741174642296
BCL2L1|BCL2L1	645.352455047871	1.29903444162499	0.311051589352868	4.17626685119205	2.9633216833331e-05	0.000431558730144694
KATNA1|KATNA1	441.05048791614	-0.0347797058279636	0.196026044548733	-0.177423902563708	0.859175433618348	0.915795664030062
SASH3|SASH3	3455.63363904418	0.12025871624957	0.255745218201266	0.470228601321998	0.638191701977023	0.763886886316436
MUL1|MUL1	460.918807697676	-0.70370367788203	0.266653905163634	-2.63901508380384	0.008314728126578	0.0330924251667416
SLC15A3|SLC15A3	331.540266442693	-1.65142193788426	0.672575355968944	-2.45537087142472	0.0140739305681106	0.0494604579375993
C1orf116|C1orf116	14.2041395837817	-0.678016647785714	1.05600483105937	-0.642058282162912	0.52083534158887	0.668017998835235
SLC43A1|SLC43A1	205.167026450714	0.774190770624852	0.447740708668309	1.72910516206464	0.0837902754603669	0.187122009890028
FTO-IT1|FTO-IT1	22.3782002777629	0.967542151869008	0.578286443417872	1.67311920049604	0.0943038324133158	0.203850214979986
SORT1|SORT1	800.288085976973	1.27964582543245	0.77107200220663	1.65956722818414	0.0970015457015306	0.208065586100433
FLJ26850|FLJ26850	6.19773354109143	-1.85684350206931	1.03106108326534	-1.80090542859862	0.0717177872218613	0.167500727768868
GCSAM|GCSAM	144.306228275898	0.720528285095923	0.93231551854613	0.772837382584309	0.439618626628453	0.595475384786517
PCDH11X|PCDH11X	4.31527883977368	2.90838472967475	2.15636860052277	1.34874192147375	0.17741987529807	0.318948290126224
CHMP6|CHMP6	205.147667754612	0.50399926315404	0.268468698897647	1.87731108029912	0.0604754704683156	0.147738111149642
SIRT1|SIRT1	974.65314011296	-1.22712496560104	0.277404966307719	-4.42358686628494	9.70755738025129e-06	0.000177550038074678
TMEM171|TMEM171	16.5687043794327	5.17813367157153	2.05725079121348	2.51701624988424	0.0118353370451186	0.0434028371495636
USP22|USP22	3561.81844063031	-0.658762194360703	0.272988849415321	-2.41314689508974	0.0158154440511123	0.0538640599355385
MAPK7|MAPK7	258.861424140444	-1.61137139125546	0.421632645692545	-3.82174247586718	0.000132512031608666	0.00137934950110638
AIF1|AIF1	584.399305773863	-1.48693541250922	0.653838558302775	-2.2741629315484	0.022956192077098	0.071770848018502
APBB1|APBB1	822.538438264111	-1.25290981768045	0.593322463232825	-2.1116844470269	0.0347135239079621	0.0973655758563909
ARPC5L|ARPC5L	507.859660157399	-0.992170292071456	0.324319727339868	-3.05923509559355	0.00221902938312443	0.0120118067842916
SIGLEC11|SIGLEC11	21.0432660551393	1.07983406686607	1.2546040824786	0.860697077226749	0.389404903282624	0.548723497106359
TRNP1|TRNP1	14.0063804743647	-0.811965973003075	1.03007688167519	-0.788257641199162	0.430546019154284	0.586858691893965
KAT8|KAT8	594.113147484791	-0.575154132662436	0.259440768226715	-2.21689958981247	0.0266299538067497	0.079935452849468
PRH1|PRH1	22.3621347388297	1.32745975627266	1.07781029456837	1.23162653294592	0.218088624843539	0.36771775107165
ENOSF1|ENOSF1	494.021973904439	0.855482498040548	0.390845198668933	2.18880134885625	0.0286112816601511	0.0843573864531195
PNPT1|PNPT1	856.122193774477	1.3325694177029	0.279547103898626	4.76688686492756	1.87094297443682e-06	4.74721319403774e-05
TMEM150C|TMEM150C	9.44101788173859	0.218532516796406	1.03359015607721	0.21143053221966	0.832551333946339	0.898726914054991
B3GALNT1|B3GALNT1	53.1764671672257	0.261367634631438	1.34210953936404	0.194743891586739	0.845593449166065	0.906609792957171
PRDM5|PRDM5	60.8502765993805	7.12851379036328	1.79508165276003	3.97113623182701	7.15306588043366e-05	0.000849693117084305
RPL36A|RPL36A	7255.09462260825	-0.644357990005659	0.364786814308021	-1.7663960558113	0.0773294263537561	0.176630645161595
TDRD6|TDRD6	25.5008042355045	-0.450381594009974	1.00568214940064	-0.447836917736274	0.654270897656575	0.776716883242787
PROSER1|PROSER1	689.991360571292	0.00444033999648321	0.25242970919632	0.0175904017424108	0.985965613793664	0.992988402932064
CBWD5|CBWD5	513.245300922033	0.746772111518681	0.272342263360779	2.74203534296626	0.00610597712884709	0.0262585472161089
PLEKHA4|PLEKHA4	10.9862437392312	4.09835068901831	1.83498614496903	2.23345048149532	0.0255192523533188	0.0775978237098054
C1orf177|C1orf177	8.10735613351648	3.88627764863308	1.36652256542986	2.84391765415932	0.00445625631464272	0.0205988773964225
SCAPER|SCAPER	957.437063570342	0.789183276038519	0.363617712000608	2.17036533148088	0.0299791809668701	0.0875749716581362
SLC37A3|SLC37A3	463.378379793927	0.094917040872567	0.32251427975294	0.294303374552214	0.76852609426327	0.859284404412329
DVL2|DVL2	436.368992889127	0.218783432237311	0.357615011968986	0.611784810242488	0.540680140863451	0.684903179666128
NOP10|NOP10	777.999177497393	0.125004416392274	0.274034520062409	0.456163027795932	0.648272749813377	0.771738601471886
DNAH3|DNAH3	14.5569641984802	2.25194557933391	1.91515284632617	1.1758568427861	0.23965208717561	0.393060808648266
ATP5F1|ATP5F1	2465.09413742622	0.232037009421584	0.256883169445801	0.903278365500472	0.366378175694639	0.527281836936869
LOC100289561|LOC100289561	82.6169917019531	-1.1743062568851	0.454340338425737	-2.58464009811237	0.00974806923813804	0.0374152578704629
DDX47|DDX47	928.241780011429	-0.732836167720386	0.290828056410468	-2.5198262394811	0.0117412779099199	0.0431210359435748
GLDN|GLDN	15.6551283465648	5.35653434226166	1.63600885838778	3.27414751747757	0.00105981268542816	0.00678907410069858
AFF4|AFF4	3336.24722022023	-0.575019449246761	0.237155139810591	-2.42465522655765	0.0153229310917276	0.0526690542806918
MED25|MED25	360.347026172789	0.587791955309714	0.361035289500226	1.62807341111552	0.103509320654372	0.218372403779583
CNEP1R1|CNEP1R1	478.590038541582	-1.04224797133336	0.280202808116625	-3.71962000787502	0.000199522729603225	0.00187472241057521
MRPL10|MRPL10	968.224819573372	-0.702421059581048	0.425963076926979	-1.64901865356152	0.099143813262532	0.211239333811152
BAZ2B|BAZ2B	1672.1038363973	0.692077308134352	0.468076905842499	1.47855469794792	0.139259367988157	0.268606655548554
SNORD103B|SNORD103B	10.9281026508062	0.180857626965624	0.575574016008565	0.314221319822286	0.753352951260276	0.848005732822703
MTRNR2L9|MTRNR2L9	339.444467383238	-2.63679615163741	0.785759491724421	-3.35572930318757	0.000791560057527818	0.0054155056613057
RNF138P1|RNF138P1	76.3652520783949	0.201938956954436	0.724876502410908	0.278583946758925	0.78056413379907	0.866398515947017
TMEM179B|TMEM179B	390.993146149879	-0.240203628003916	0.272474282931362	-0.881564400939901	0.378012413278151	0.537868955176177
BTBD9|BTBD9	1039.37105913258	-0.677384021076773	0.27524177041162	-2.4610509519095	0.0138530690998005	0.0488406442840132
MMRN1|MMRN1	130.558803234742	1.62795240837466	1.09141373219444	1.49159971178064	0.135804113814909	0.264204841064574
ZNF222|ZNF222	55.5550494194711	-0.564659149423646	0.632900311173947	-0.892177076633565	0.372298027027319	0.532944260929947
MIR3064|MIR3064	190.935175385577	0.891743913626716	0.429958713503412	2.07402219241136	0.0380772498460488	0.104477061275551
KIAA1217|KIAA1217	91.8363972118758	2.97762322875499	1.00977456933534	2.94879997890514	0.00319010371945059	0.0158178983351604
FAM162A|FAM162A	384.125337804924	0.103043743068228	0.34951635020591	0.29481809079181	0.768132845899007	0.858945909164883
NUPL1|NUPL1	1252.89538257608	-0.785392448201443	0.275381013657996	-2.85202105173759	0.00434422234875421	0.020198157104404
MIR4480|MIR4480	3.39493958154738	-0.663605976723922	0.925649899825065	-0.716908171058339	0.473430759837517	0.627459483878689
KIAA0825|KIAA0825	146.991149619461	1.69087733282497	0.680521274130365	2.48467960826901	0.0129668078308608	0.0464732301100742
CCL21|CCL21	95.6601066942848	3.30656107956791	3.773803373874	0.876187959992614	0.380927860778	0.540356649111705
SLC2A12|SLC2A12	98.581623535029	0.110398454017335	0.348418643272753	0.316855760014288	0.751353051997956	0.847026637523386
TMEM56-RWDD3|TMEM56-RWDD3	23.5684361550681	0.170789472700422	0.802675489100629	0.212775243569211	0.831502274352548	0.898147448017695
GNPTAB|GNPTAB	1780.27103966254	0.771615435636902	0.421420766323181	1.83098579210774	0.0671026637623531	0.159560992138758
PRKAG2-AS1|PRKAG2-AS1	27.5075615806048	-2.93064510379292	0.664483798473117	-4.41040866688865	1.03175716848381e-05	0.000186300704789152
ADIRF|ADIRF	15.5356456304334	-2.03808939892841	1.01307381428809	-2.01178766066579	0.0442423252312322	0.116776924953013
NEU3|NEU3	213.514882323226	-0.207798402515053	0.256905299506241	-0.80885214479589	0.418600198150693	0.575677878592525
STAR|STAR	14.5425361628729	-0.462957032538217	0.844384262052075	-0.548277666157716	0.583501260310093	0.720772402994926
PPIP5K2|PPIP5K2	1834.7798937919	0.909206818988825	0.312579791101046	2.908719133077	0.00362912739521912	0.0175046741734187
UBE2F|UBE2F	583.856292903527	-0.738806302086535	0.362338296949796	-2.03899590053243	0.0414504366952747	0.11107297976131
TIPARP-AS1|TIPARP-AS1	59.5973247722946	-0.538340018240559	0.424722625287988	-1.26750963143424	0.204973121942608	0.352332720296053
LAMP3|LAMP3	199.593349218689	1.56143549615547	0.810109520008268	1.92743753479102	0.0539251256785927	0.135277711528078
ZNF345|ZNF345	153.776598870609	-0.36611360550777	0.323315247629963	-1.1323734596235	0.257477458066923	0.413781143197742
SIGLEC5|SIGLEC5	169.699037239325	-0.112513466758766	0.702634086445532	-0.16013095426091	0.872777917817764	0.924505511907858
RGS13|RGS13	1174.74693521087	11.3753121688044	1.39140225260011	8.17543032401121	2.94811764602952e-16	1.3970093699415e-13
CLMP|CLMP	22.6901355904237	-0.367956288629223	0.670776068636687	-0.548553095188791	0.583312182443037	0.720632222010553
GOLGA7B|GOLGA7B	260.451766908935	2.25419301911494	0.743098400286458	3.03350541226569	0.00241730375154018	0.0128551205434963
KCNIP2-AS1|KCNIP2-AS1	7.06709897361227	3.71193049118341	1.20393000095149	3.08317799892833	0.0020480261495609	0.0113024999937838
C11orf24|C11orf24	128.532188901313	0.144521380546939	0.42289290834406	0.341744630130705	0.732543082028262	0.833354860674319
RGS10|RGS10	1261.50525857228	-0.578437597571128	0.479606554078286	-1.20606691600113	0.227791690070993	0.379273331989309
TLR8|TLR8	791.881591700772	0.0863489716859968	0.715980137592622	0.120602468074509	0.904005913873908	0.944291670417112
ENHO|ENHO	11.5894262453117	-2.12760781023088	1.21375313546929	-1.75291642761297	0.0796163533594107	0.180212491526887
OR2W3|OR2W3	6.46374732058857	0.585715178352917	1.71310189450408	0.341903292636584	0.732423671642762	0.833296333944078
CRYBB2P1|CRYBB2P1	132.106586802789	0.236809715953479	0.315856317649437	0.749738734737959	0.453412073669824	0.608517597034065
GPR68|GPR68	345.096888870593	0.897587256868638	0.567579377081839	1.58143035690181	0.113779670988715	0.23373157251847
SOWAHC|SOWAHC	339.5366522083	1.19613971411073	0.703822146567943	1.69949144104583	0.0892266258767465	0.195869592024164
TICAM2|TICAM2	14.0299281172977	4.33052564539693	1.66836308266722	2.59567338212358	0.00944057589549045	0.0365228634544647
NDUFAF6|NDUFAF6	152.482337065083	-0.579785841792669	0.297010231277146	-1.95207363497071	0.0509294629110714	0.129750984193522
ADAMTS1|ADAMTS1	23.8510068617938	-1.50479312839449	1.49646040250602	-1.00556829026315	0.314623283875123	0.475521646730683
C5orf67|C5orf67	4.62047161318885	3.58587582907496	1.89737413496651	1.88991499514577	0.0587693297287232	0.144394991330396
GPRC5B|GPRC5B	6.83569748661026	1.09933246808298	2.06353566879692	0.532742169038401	0.594212071102054	0.728801111394855
FLT3LG|FLT3LG	751.963964055894	-1.10089144895039	0.397943222365897	-2.76645357195743	0.00566696536454459	0.0248832716595443
NDUFA8|NDUFA8	193.416548958345	1.05010069876812	0.376723785533573	2.78745526322637	0.00531237886661483	0.0236579282592051
RBM48|RBM48	365.654099080633	-0.638469060535339	0.286181242441901	-2.23099548764087	0.0256814279142781	0.0779796132923745
OLR1|OLR1	46.6986701936196	-3.11978586732832	1.34883247689537	-2.31295280975825	0.0207252338284246	0.0661645165174377
MGRN1|MGRN1	937.270949938537	-0.654992681935049	0.298464605261937	-2.19454055987717	0.0281965713999273	0.083536749975486
VPS9D1-AS1|VPS9D1-AS1	38.6564408484833	0.968001818695425	0.641762237190771	1.50834960768761	0.131465073003864	0.258058343593455
PRORSD1P|PRORSD1P	39.8796467513085	0.670581511166788	0.463796430954971	1.4458531079811	0.148218406609165	0.281035433103777
MAP4K1|MAP4K1	1750.18897407117	1.07052088872781	0.372129267218213	2.87674467727385	0.00401800557876151	0.0189783652511922
TP53INP2|TP53INP2	542.513349536285	-0.014506981196825	0.710448329148608	-0.0204194740160907	0.983708749070248	0.991470192244491
LOC440600|LOC440600	8.67192628659451	-0.741427051374369	1.05183504831442	-0.704889091271977	0.480879259373753	0.634406023671935
ACSBG2|ACSBG2	3.67761275086683	1.49729308642769	1.65983009542192	0.902076116439551	0.367016435127058	0.528015191995323
DUSP6|DUSP6	3177.93175912517	1.93150168032451	0.676009346633723	2.85721150150168	0.00427380953494699	0.0199554467579828
WWP1|WWP1	2172.57634725896	0.737534903556729	0.321977749660822	2.29063935111561	0.0219842810199541	0.0694630382272221
TFAP2A-AS1|TFAP2A-AS1	69.5869000908508	7.41938502732561	1.25029578944854	5.93410382562195	2.9545482804086e-09	2.28203061675788e-07
FLNA|FLNA	57032.3244277781	0.562882498129696	0.32127065760966	1.75205075470537	0.0797650809640068	0.180454343811862
EXOSC2|EXOSC2	526.722154152648	-0.0825829811774038	0.172871706581309	-0.47771253498074	0.632854821338895	0.760301739244542
SUCLG1|SUCLG1	726.820609099281	0.78817468982388	0.202680427773804	3.88875580380905	0.000100759434564178	0.00111107872088914
MIR4722|MIR4722	5.46198374688721	0.881396655195476	0.886951752947234	0.99373686591937	0.320350989732237	0.481108052776601
RGPD4|RGPD4	183.803751055989	-1.78332913899159	0.337206487007397	-5.28853746206984	1.23298239127375e-07	4.95822941885384e-06
LOC283045|LOC283045	107.086145808924	5.68231311453509	1.29443174259027	4.38981286349196	1.13448248213074e-05	0.000200917993527256
TMEM180|TMEM180	103.812855123076	0.575714866120809	0.347618279994263	1.6561697104373	0.0976874553608356	0.20902540332457
COG8|COG8	409.321741198332	0.425084136529278	0.249496575427246	1.70376741965836	0.0884245469602035	0.194645019692812
NBAS|NBAS	2157.03775048502	0.979170226684433	0.21977926158013	4.45524395543313	8.3797851965752e-06	0.000156467277797181
SON|SON	11847.8319785608	-0.131621321971432	0.246516154847838	-0.533925746378266	0.593392908316377	0.728185224875564
ABCC4|ABCC4	522.320138131714	1.23211347325595	0.472313990367985	2.60867452242098	0.009089364958778	0.035439011588245
ZNF253|ZNF253	320.156933279487	0.439139410415297	0.524402161654967	0.837409611412379	0.402362365013572	0.561182033711157
SPRED1|SPRED1	113.518662409597	1.736184152845	0.714913459653746	2.42852352183421	0.0151604416717774	0.0522626865574661
PRR34-AS1|PRR34-AS1	52.6787039521057	-1.50829006921997	0.703364918340538	-2.14439195059445	0.0320014946845299	0.0917211326101439
LCNL1|LCNL1	7.58133550262011	3.40213422662149	1.65815084790991	2.05176400621805	0.0401926029226231	0.108621775570125
ATP6V1C1|ATP6V1C1	733.795633198804	1.34304357307906	0.334283751684875	4.01767530222387	5.87751081661302e-05	0.000730335911748235
PPARGC1B|PPARGC1B	306.714792196141	0.903118539822213	0.439791580049462	2.05351484837577	0.0400226711646645	0.108356623460479
DMTF1|DMTF1	2891.97272274851	0.819194962297699	0.311406396647864	2.63062984934134	0.00852268047867828	0.0337461962133393
PRDX6|PRDX6	1169.57941332307	-0.879783398469132	0.278681304689255	-3.15695162777474	0.00159427791045166	0.00930013617575773
TENM4|TENM4	8.61951533191508	-2.7426391311794	1.82129353637896	-1.50587430109275	0.132099444852435	0.258810991909459
HNRNPR|HNRNPR	3806.32566761034	0.231595407782052	0.178917513146829	1.29442559148468	0.19551845569928	0.341300784923883
URB1-AS1|URB1-AS1	60.1685980998454	0.332407512927807	0.472006937706207	0.704242854020737	0.481281547567657	0.634459351391257
DDX18|DDX18	2566.90937575048	0.188068872306881	0.279182033646554	0.673642461337528	0.500538650936168	0.651034433743608
SCRN2|SCRN2	263.722094151007	0.0438032951117733	0.336208620291551	0.130286055942849	0.896340111780937	0.939025524608937
ELK1|ELK1	738.15500592391	-0.487755468384299	0.373949167379883	-1.30433628667183	0.192118948267401	0.33680925335816
CAMK1D|CAMK1D	946.80969942825	-0.326317851368088	0.39861759933198	-0.818623793618108	0.413001087472763	0.570393703557302
PKD1L1|PKD1L1	11.8058136329194	3.81801962487914	1.71645595285381	2.22436213322645	0.0261240894149368	0.0788353975408066
ADD2|ADD2	42.7875886598632	1.30935917613349	1.34402643690075	0.974206414535122	0.329954060360093	0.491302296415584
MCM3AP-AS1|MCM3AP-AS1	126.640760447784	0.890576587262964	0.422220471804358	2.10926908270716	0.0349213618832551	0.0978546009108376
PTOV1-AS1|PTOV1-AS1	148.833079832734	0.927137846959655	0.320832913407518	2.88978408453379	0.00385506508094851	0.0183371828714786
ADCY4|ADCY4	92.8757509983481	0.670588797955772	0.637057566436641	1.05263453930339	0.29250852088039	0.452053935354419
SLC26A11|SLC26A11	440.328896873005	-0.094174900452979	0.459205084274006	-0.205082442852016	0.837507713469857	0.901969532675555
RALY-AS1|RALY-AS1	22.7003070779547	-0.556540159740775	0.414936957879376	-1.34126437564177	0.17983463176022	0.321837358237412
CD3G|CD3G	1808.02059550795	0.826629742564981	0.536973447282476	1.5394238704882	0.123700850225609	0.247291248875208
ANKRD53|ANKRD53	4.01717795686408	-1.30015539778236	1.73943194606369	-0.747459767382446	0.454786079667624	0.609905166099719
LOC286437|LOC286437	87.2844302760398	1.0141811745994	0.447305092587349	2.26731416969359	0.023371040476751	0.0727435563072742
MASTL|MASTL	952.263370232943	-0.600296163831482	0.426217414399192	-1.40842711618829	0.159004634527646	0.295602614481309
RPS27|RPS27	34551.7011304593	-1.17964176397574	0.393222003061375	-2.99993834218789	0.00270034262996183	0.0139867377639943
ROPN1L|ROPN1L	15.8551376262662	5.28937918740908	1.38512524401162	3.81870102380773	0.000134156236813849	0.00139268003323658
C6orf201|C6orf201	29.734390927442	-0.839694044001057	0.728563728684584	-1.15253341738151	0.249101945869699	0.403799154057915
MICALL2|MICALL2	14.8847597942574	0.551905272784507	1.03453628801394	0.533480825350295	0.593700780849547	0.728334438191654
BATF2|BATF2	28.1458861051276	2.9680868453174	1.34232575839579	2.21115241717819	0.0270252841559048	0.0807763905737265
GLB1L3|GLB1L3	59.8414413460946	6.69266913464411	1.18825691851919	5.63234181963321	1.77778879381602e-08	9.99037529550524e-07
ARPC1B|ARPC1B	6319.05548927325	1.65998527179103	0.394670566516881	4.20600220188963	2.59927700748632e-05	0.000387526562689266
MRS2P2|MRS2P2	181.343237614589	-0.371095391592187	0.605296547884764	-0.613080304008005	0.539823242794008	0.684220219923186
GNA14|GNA14	4.96193013016649	2.84764206957624	1.81879032436315	1.5656791392781	0.117423752344611	0.238575321538265
LOC100505549|LOC100505549	160.318162885734	1.92713597248012	0.450878915723018	4.27417629274106	1.91845201792862e-05	0.000304675898825566
DCAF16|DCAF16	1388.26301025394	-0.363334235447124	0.237334358970544	-1.53089606167061	0.125795082744087	0.250546993723966
ERICH6|ERICH6	3.53467350392871	-0.278425767570959	1.60049432156238	-0.173962358891197	0.86189504436743	0.917857495924086
OPTN|OPTN	3926.35479871885	1.34255041244831	0.305958490649547	4.38801488920308	1.14389946456619e-05	0.000202177311615313
FAM20A|FAM20A	112.246932091109	1.2599397273279	0.579198895850612	2.17531444958566	0.0296065604468263	0.0867242541324177
PPP1CA|PPP1CA	3111.38390342172	1.30805234942816	0.350523666490455	3.73170908122913	0.000190185064553428	0.00180928634661706
SNRK-AS1|SNRK-AS1	54.4320772748296	-0.362648523676304	0.517569608402398	-0.700675846859914	0.483505332621337	0.63619504666791
ABLIM2|ABLIM2	21.2861521219508	-0.389712844044153	0.658903421332701	-0.591456701280922	0.554214458413737	0.696998791770795
RPL39|RPL39	18754.6949923351	-1.01766435491633	0.376609332244271	-2.70217508645343	0.00688874762710205	0.0287542515092303
BRD4|BRD4	1522.46935732168	-0.3083873271428	0.277316896544794	-1.11203944290855	0.266121191842007	0.423430093416677
FAT1|FAT1	103.944214503692	3.25615519403854	1.5109614334059	2.15502204228917	0.031160109376997	0.0900494804197938
MRPL47|MRPL47	765.574325461334	0.156682926188408	0.377249344928401	0.415329882728213	0.677900428376361	0.794175344829797
MGAT4B|MGAT4B	954.593561576101	0.360789485801791	0.353308543245496	1.02117396451151	0.307172025097584	0.467260724972752
ARL14EPL|ARL14EPL	12.5973050839832	4.55412926722347	1.9519070707306	2.33316910190753	0.0196392718241926	0.0635305079139425
TRIM58|TRIM58	155.205056095197	2.05480765190477	1.13634365042515	1.80826253672116	0.0705656496229795	0.165442554047734
ATPIF1|ATPIF1	624.366190391298	0.600543757084583	0.218395098429207	2.74980419159567	0.00596308862098777	0.0258341568548996
SELENBP1|SELENBP1	8.7530376094486	4.18267421491493	2.17239713456375	1.92537273612031	0.054182743908658	0.135673528841831
LOC100130691|LOC100130691	69.458498334967	1.2174294669113	0.479709413928542	2.53784777109388	0.0111536488636506	0.041466693283797
CYCS|CYCS	2432.99390024388	0.240860345043861	0.346118765160996	0.695889299535162	0.486498159019811	0.638982112674683
ADAM23|ADAM23	37.3734100002257	-3.84717996878183	1.40021779295755	-2.74755826424388	0.00600408400879707	0.0259412530621584
DNAL4|DNAL4	87.2717401671083	0.816986028236784	0.423752209177521	1.92798057577684	0.0538575422795076	0.135225256454916
ZSWIM6|ZSWIM6	797.264118412199	0.32490738165603	0.298788017287009	1.08741771040949	0.276852247686172	0.435044706564046
GPATCH1|GPATCH1	220.781095019106	0.148714412737303	0.260432399212612	0.571028847358949	0.567980088481876	0.708177705259048
RPL31|RPL31	18465.6526368027	-1.08840505546751	0.408634286892616	-2.66351867765205	0.00773281189092113	0.0313333466335845
TBC1D16|TBC1D16	249.069197268026	1.86762235572897	0.680950789727052	2.74266860969142	0.00609421537256041	0.0262272651269273
UQCRBP1|UQCRBP1	62.5664575259515	-0.361961674570035	0.358672580264497	-1.00917018608758	0.312893022312956	0.473741199073775
CYP4F35P|CYP4F35P	5.75492194241341	-3.69986753712958	1.76855868781938	-2.09202417913057	0.036436352817008	0.101138094320982
UQCRFS1|UQCRFS1	1312.8802659768	-0.545800784310896	0.282820812090274	-1.92984660597283	0.0536258468315327	0.134834377332586
TMEM88|TMEM88	21.2709171038586	-1.76826786736266	0.958163772242143	-1.84547560509916	0.0649683839632768	0.155847677661531
CCL14|CCL14	4.6121855276671	0	4.30447792601276	0	1	1
EIF5|EIF5	5968.61702869656	-0.347931516505608	0.332988631512039	-1.04487506052599	0.296080717645257	0.455926859518205
CMTM3|CMTM3	1060.5243829091	-0.848015827117769	0.277978926579972	-3.05064789461227	0.00228348188810689	0.0122817023631121
SHCBP1|SHCBP1	223.356670809468	3.52930076233197	0.727814105379158	4.84917884422337	1.23973609674743e-06	3.4152150392877e-05
HLA-A|HLA-A	43842.9610486347	-0.436373256177577	0.36898234165082	-1.18263994484194	0.236951874505155	0.390303851506865
AFAP1L1|AFAP1L1	7.53846399629599	-0.194901405393126	1.9665513257369	-0.0991082220140339	0.921052344008025	0.954534268086814
DIS3L|DIS3L	754.213222680909	0.331565956418655	0.219154910741983	1.51292962268601	0.130297536452707	0.256455624901808
LINC01336|LINC01336	12.7033685921397	-2.98508526361764	1.10505713142376	-2.70129496361118	0.00690700527890663	0.0288142540460063
SNORD15B|SNORD15B	724.639729990408	-1.44145451016599	0.480756610409137	-2.99830408767395	0.00271486641322362	0.0140412250215486
ZNF526|ZNF526	217.749669331028	-0.353597459347253	0.278231878585262	-1.27087327715719	0.203773734593714	0.35071806112021
ARPC2|ARPC2	7742.08176785642	0.476430004257106	0.228267509734332	2.08715644557387	0.0368739950921147	0.101989549763377
IFITM3|IFITM3	932.04495744002	0.810452994582049	0.595847121199676	1.36016935510284	0.173776337714435	0.313943382704502
NOL9|NOL9	1328.31906271204	-0.619424924700649	0.259037796409854	-2.39125306532713	0.016790974800006	0.0564576453835386
SGCE|SGCE	252.808378803917	4.96786472824845	1.54953585628489	3.20603405729457	0.00134578059278489	0.00817021161125259
GTSF1|GTSF1	525.958214261903	6.88316482363719	0.807408604680142	8.52500801172906	1.52799241970684e-17	1.03039581133539e-14
TTLL7|TTLL7	34.0440259276268	6.19289532573317	1.6739964081381	3.69946751117657	0.000216052294362106	0.00200108023087734
PIFO|PIFO	7.27739728868827	0.826458419812807	1.57313619035178	0.5253571972227	0.599334902670643	0.733450048755803
ASPRV1|ASPRV1	36.363798250511	-0.412401190064465	0.476235183717764	-0.865961197669238	0.386511440939332	0.54558820856458
CA2|CA2	115.179642502754	0.560169548198603	0.847871992236333	0.660677028287146	0.508819458686941	0.658094686423587
MLLT3|MLLT3	1031.5642589589	0.0535406422386552	0.332977937034944	0.160793362813814	0.872256152923465	0.924103163202832
SPAG1|SPAG1	149.930770506334	0.067364994270901	0.413755672599819	0.162813463916072	0.870665307050627	0.923327576877677
EXOSC3|EXOSC3	290.126763220983	0.284372547539712	0.309787778437347	0.917959220257698	0.358640215839788	0.518986373747029
POGK|POGK	1251.9320098395	0.016044094802627	0.220765745801268	0.0726747473635236	0.942064944082522	0.967339311658162
DUSP5|DUSP5	666.609222255432	-2.51902247835226	0.749714931711435	-3.35997373375222	0.000779498830890887	0.00535329142264392
ANKRD13B|ANKRD13B	66.8853075368045	2.392368578439	0.632707463131316	3.78116067510725	0.000156098881699374	0.00156633334196969
PTPN6|PTPN6	4815.02776348999	1.60431494715644	0.371091861228482	4.32322859856163	1.53762263306643e-05	0.00025529486387835
ZNF324|ZNF324	305.067355615949	-0.442133312723468	0.373068183072825	-1.18512736487411	0.235967092977333	0.389018433584539
TBC1D10B|TBC1D10B	620.90519746775	0.106394130106117	0.337270479300065	0.31545639667876	0.75241515256457	0.847712046646614
PDHX|PDHX	450.562185107477	-0.421089673296197	0.161862130576017	-2.60153299476332	0.00928081370665085	0.0360566433723584
MKRN3|MKRN3	19.5728928702676	-0.462243513179515	1.33013097419923	-0.347517291263588	0.728202730465892	0.829925797793713
LOC100652999|LOC100652999	45.171096900308	4.72602527610009	2.52248210042228	1.87356147157949	0.0609908926223935	0.148500669399865
TFAP2E|TFAP2E	99.1144189900141	0.529350610042093	0.524567894410485	1.0091174387197	0.312918315546307	0.473741199073775
ACSL6|ACSL6	1667.16347795123	2.13771189752173	0.72898514044505	2.93244920769804	0.00336299927307085	0.0165488257801716
LMBR1|LMBR1	974.372846930195	0.0948845839859941	0.339099482419405	0.279813414367407	0.779620659472401	0.865844620417407
DOCK2|DOCK2	9622.68546063584	0.184953887458838	0.234788678582713	0.787746191917347	0.430845180653181	0.58696844884069
GRIN3B|GRIN3B	10.3792054506975	-0.554437853772491	1.24060153762077	-0.446910500236677	0.654939682231395	0.777109059994661
USP12-AS1|USP12-AS1	11.6344411240806	1.41042391499779	1.22235164610479	1.15386101822035	0.248557153106303	0.403143415213532
ABCB6|ABCB6	63.3477015907096	0.355010813549442	0.533226548273612	0.665778578915161	0.505552638740007	0.655222827840667
ARHGEF4|ARHGEF4	22.9870384621947	-1.75814759975967	0.656945731503718	-2.67624480295404	0.0074452241449446	0.0304353264008659
CCT8|CCT8	3131.89458353645	0.10582109001466	0.28642523293777	0.369454495783378	0.711788984758278	0.818205582853116
AOAH|AOAH	1320.04223076845	-0.540678590088633	0.618633152251097	-0.873989032306464	0.382124226609901	0.541539209398222
LOC389906|LOC389906	234.495349048784	-0.599423090739035	0.457851502386224	-1.30920852637803	0.190463724815361	0.334944883368879
MRPL17|MRPL17	319.235548953236	-0.230705616894173	0.326246607681657	-0.707151006208436	0.479472641492284	0.633142081318708
ESR2|ESR2	59.4967734200821	0.334788060282645	0.525521913580907	0.637058230362648	0.524086914729854	0.670643621580856
COLGALT1|COLGALT1	983.085388970186	0.121127953718938	0.339173069336074	0.357127274155476	0.720996527167414	0.824930312635491
CDA|CDA	80.8117421313587	-1.48837927679614	0.873688311022465	-1.70355864673789	0.0884635727202408	0.194706480103437
ZCRB1|ZCRB1	672.284873343592	0.52887850517335	0.29957543664198	1.76542680234964	0.0774920621449005	0.176886906078185
ZNF32|ZNF32	419.005448135227	0.595726710147517	0.319937260759241	1.86201103533175	0.0626015347611764	0.151496578187399
ZNF281|ZNF281	2196.34840672947	-0.406335696036192	0.413978740799338	-0.981537591161353	0.326327706318142	0.487351249989436
ZNF148|ZNF148	3015.63628220894	0.30935713790871	0.285085958747483	1.08513635419949	0.277861268012312	0.436067097391681
LONRF3|LONRF3	142.48130766205	-1.68456277546175	0.805128605506915	-2.09229030485278	0.0364125544603171	0.101096012249048
SMC5|SMC5	3232.05872400619	0.51966215932357	0.237346097964904	2.18946999246818	0.0285626972633295	0.0843080422757503
LINC00239|LINC00239	66.2246555163306	2.34515205785396	0.845700735395481	2.77302828258423	0.00555372936796168	0.0244841682193795
LOC729218|LOC729218	231.169006041191	-0.631600534928795	0.404976928965138	-1.55959633686483	0.118855302716336	0.240384129948727
FAM104A|FAM104A	1351.9799947828	-0.448025703300286	0.185568908787633	-2.41433603413064	0.0157639163354076	0.0537616699297222
CUTC|CUTC	373.395399774551	0.286755519117319	0.238088104191339	1.2044092672806	0.228431431907328	0.380018333877577
ZNF440|ZNF440	258.524227582025	0.523850672995925	0.585005439691795	0.895462909322537	0.370539684588828	0.531251311627764
CSNK1D|CSNK1D	1424.70283086542	-0.81392281340458	0.437096625022422	-1.8621118691155	0.0625873233438552	0.151483095001079
ZNF24|ZNF24	3340.01206702359	0.00831035016741518	0.277803625315141	0.0299144770266691	0.976135260019256	0.986999971967567
ADAM9|ADAM9	502.148051482832	-0.321484132831512	0.488495761840296	-0.658110382821735	0.510467204603378	0.659253204059445
SLC35A4|SLC35A4	612.078060445703	0.25771290553758	0.33705182862116	0.764609130268936	0.444504330716024	0.599868721555115
LINC00339|LINC00339	149.527516122058	0.334722724784053	0.381227014369473	0.878014180966857	0.379936023022803	0.539648273789599
PKDREJ|PKDREJ	11.5097652091878	-0.495951567348462	0.929032439517219	-0.533836652255317	0.593454553028399	0.728185224875564
APLP2|APLP2	4684.05461559618	-1.37173018346145	0.430129111007435	-3.1891126370141	0.00142710259518521	0.00853708396807884
PSTPIP1|PSTPIP1	1325.14973924791	0.475960140476151	0.378092238576713	1.25884663030337	0.208085733889845	0.356111973869268
CLEC11A|CLEC11A	31.0553646513091	-1.25060293270555	0.77006074028652	-1.62403154358996	0.104369076595724	0.21959714628019
SHROOM4|SHROOM4	16.0087816490148	3.76218035582394	1.77458368684522	2.12003546731131	0.0340030543708281	0.0958944108547096
WFS1|WFS1	32.3351331612236	0.770787048955194	0.638847009245296	1.20652838285299	0.227613822041801	0.379160523143222
GPR183|GPR183	4279.05475380229	-1.66547865461598	0.665513217973877	-2.50254782269606	0.0123302965991324	0.0448334903095371
WDR63|WDR63	23.0283963425479	5.28989687866534	1.93573655457475	2.73275661719755	0.00628067238659016	0.026819081004114
RRN3P2|RRN3P2	403.01253272652	-0.133753621919558	0.373810073194839	-0.357811711108819	0.720484225858668	0.824505576136024
TYK2|TYK2	2626.44798629574	0.672803631755061	0.296666009658481	2.26788243294062	0.0233363733303297	0.0726614515362584
CLASP2|CLASP2	1676.90757540891	0.273047184868513	0.277079723452921	0.985446287681554	0.324404902627046	0.485306412778157
JMJD7|JMJD7	156.960487382899	-0.624009867430203	0.349145931253381	-1.78724656819028	0.0738976457415683	0.171132931288722
S100A6|S100A6	6763.43839914124	0.162422189110527	0.369775887371857	0.439244944457914	0.660484062019947	0.781058498810243
UBAP2L|UBAP2L	1961.05398133865	-0.14757726176738	0.215233863054695	-0.68566005215396	0.4929275032621	0.643846711450879
PIK3R3|PIK3R3	191.94631033398	3.25017008762868	0.748433604382769	4.34262981859171	1.40787243537389e-05	0.000238034979840023
SRSF8|SRSF8	1160.71180994776	-0.394770016206487	0.198673736063544	-1.98702669023259	0.046919439195047	0.121908495466325
SRSF1|SRSF1	4236.97219952802	0.890655824426825	0.189798161054667	4.6926472810782	2.69692244840945e-06	6.27956723611724e-05
SCART1|SCART1	65.2051207798929	0.0663762460869102	0.538625097836508	0.123232738974703	0.901922801191321	0.942789749793562
ZNF304|ZNF304	276.929614738757	-0.181663184174314	0.61011110036634	-0.297754268141056	0.765890720883982	0.857111253543043
MRPL22|MRPL22	241.960126860468	-0.30879658038682	0.274606903626536	-1.12450406857499	0.260799245474097	0.417207406103772
REPS2|REPS2	102.142122170661	-0.670565245092216	0.730265663019487	-0.918248356796041	0.35848885746148	0.518810164083543
SLC4A4|SLC4A4	47.4427194793963	-1.67192643949354	0.884984743991901	-1.88921498460186	0.0588630276657324	0.144564429760931
EEF2KMT|EEF2KMT	88.7417174281124	1.33816739449345	0.512003822018842	2.61358868224269	0.00895968280892641	0.0350512449266348
CIDECP|CIDECP	110.596008503589	-0.987963156912767	0.292689424157278	-3.37546585346343	0.000736908360626465	0.0051250354172407
LOC400684|LOC400684	14.9853286809128	-0.885762889864242	0.768299852477734	-1.15288697115806	0.248956780459406	0.403602333036964
FAM168B|FAM168B	2406.72527331674	-0.975940721110375	0.260053061569013	-3.75285226492663	0.000174833899182269	0.00170297930797929
SRPK1|SRPK1	1870.42676543782	1.28281684768856	0.26852619288629	4.77725034530165	1.77708475170194e-06	4.58875212836379e-05
TARSL2|TARSL2	414.348355397125	-0.0227827789639626	0.329005815538579	-0.0692473442351388	0.944792738274601	0.968950124830498
DCP1A|DCP1A	2030.93979340655	-0.996317391982411	0.409669349223375	-2.43200374612152	0.0150155520129572	0.0518856274030702
USMG5|USMG5	794.182745299532	0.491989713665262	0.299183784406873	1.64443977015875	0.100085395830864	0.212743387534656
USP8|USP8	1783.6862156656	-0.321742833022991	0.188445604534254	-1.70735122115574	0.0877567910131937	0.193539599601802
PHKB|PHKB	1245.66593942136	1.41682697745945	0.328519134383939	4.3127685092571	1.61222899568134e-05	0.000264674260124353
RNF169|RNF169	2399.52534423984	-0.183216598138933	0.171259815965374	-1.06981662397661	0.284701858001659	0.443468165986414
HDHD1|HDHD1	178.646666547299	2.10641988881203	0.564209493750536	3.73340029216768	0.000188911998728252	0.0017991276880513
RBBP8|RBBP8	719.364693341948	0.332295400664608	0.402532364733477	0.825512256348942	0.409080827262943	0.567078917172768
ZNF449|ZNF449	135.724506195621	-0.111825446054748	0.357207939396523	-0.313054200989118	0.754239483709696	0.848731202611007
TACR2|TACR2	20.8650353390745	0.997496544988734	0.758025506145472	1.31591422307273	0.18820283436903	0.332167805499263
CC2D1B|CC2D1B	1174.06807054937	0.302278527652773	0.269053114181847	1.12349016502544	0.26122937524682	0.41770493718217
MAP3K2|MAP3K2	4462.18537372939	-0.860952365737843	0.28381484636674	-3.03350010318113	0.00241734628596973	0.0128551205434963
MTFP1|MTFP1	343.26710356616	-1.88303845715944	0.46508385813923	-4.04881490553844	5.14776357045889e-05	0.000661214202790152
ZNF391|ZNF391	7.94620681229809	1.44234252918357	1.49704570073589	0.963459250759394	0.335317104273422	0.496211579104144
SREK1IP1|SREK1IP1	1034.89397695939	0.376518900653024	0.344822633416695	1.09192049524785	0.274868048327223	0.433114180940164
CAPZA1|CAPZA1	6821.80932403523	0.810600386536259	0.325487059767685	2.49042277476352	0.0127591220427751	0.0459071797200854
ZNF764|ZNF764	217.463840236621	-0.930623440015947	0.367922513690798	-2.52940063569483	0.0114257521202155	0.0421839887243187
BLZF1|BLZF1	841.594476258218	1.83307138950718	0.54949007822544	3.33594993275769	0.000850084718619528	0.00572370789998318
SSX2IP|SSX2IP	290.772524152057	0.000683695881350594	0.390650803351885	0.00175014584760688	0.998603586361913	0.999440001926962
C14orf1|C14orf1	277.530837263956	0.451019690093091	0.360524688381332	1.25100916699508	0.210931132957573	0.359103871156092
ARRB2|ARRB2	2560.60719846975	-1.01198678158004	0.366642345851403	-2.76014702892553	0.00577753531083804	0.0252423509896229
C8orf46|C8orf46	31.5738479558439	0.874675198748096	1.25172930751854	0.69877344366257	0.484693627267019	0.637232556004248
TTC7B|TTC7B	64.870326254557	1.89159826083653	1.1295191105587	1.6746934541912	0.0939943924073059	0.203329010752349
MTERF3|MTERF3	223.470689860768	0.265103073240999	0.303189821045599	0.874379859873753	0.381911421689093	0.541445213590593
ADPRHL2|ADPRHL2	353.91972448066	-0.63895724501599	0.295805154698496	-2.16006122566477	0.0307679301752496	0.0892102066748224
ZFAT-AS1|ZFAT-AS1	16.303494046964	4.48374348661804	1.3276423717686	3.37722234689232	0.000732218349412286	0.00509646062733053
KIAA0930|KIAA0930	832.996705742308	0.718558967497878	0.461853265316841	1.55581657954704	0.119751714490176	0.241626154895022
KCND1|KCND1	74.793750802659	1.16779826443855	0.718748990349568	1.62476508505505	0.104212623247871	0.219368646252105
MSH3|MSH3	698.908201976031	0.632127999242235	0.240736411750299	2.62580967559615	0.00864431369095909	0.0341045796452713
WNT8B|WNT8B	15.1478806699241	0.259547084231122	0.628811501285758	0.412758169499786	0.679783801707248	0.79532714942495
ARHGEF12|ARHGEF12	2495.39716125648	2.13349454200504	0.52740180863619	4.0452924261334	5.22578515349341e-05	0.000668526566824631
TSSC4|TSSC4	676.081188509471	-0.285609439678544	0.327542224993008	-0.871977466980451	0.383220670283528	0.542643192705628
ST7-OT3|ST7-OT3	7.66889996442246	2.10585132612421	1.33528549796248	1.57707945554531	0.114777243767605	0.235092221375867
BCL11B|BCL11B	6408.17659223605	-0.968873791719459	0.269975954174776	-3.58874105911015	0.000332278667974624	0.00279685160134378
IQSEC2|IQSEC2	80.0353181086653	-1.3173657297319	0.756957385930974	-1.74034331947457	0.0817987517597149	0.183727583218432
ZNF687|ZNF687	1217.73620089655	-1.53718944047154	0.317114705509275	-4.84742401965517	1.25074910999786e-06	3.43182850478755e-05
PLK4|PLK4	404.411341335337	2.29899066036037	0.463310970897049	4.9620898376508	6.9738723809575e-07	2.10815352509186e-05
UBXN10-AS1|UBXN10-AS1	11.9313502813809	0.385420623873431	2.43336934383921	0.158389693224844	0.874149734878796	0.925220781383283
LOC100505530|LOC100505530	188.600192649809	3.44602289026977	0.65568083014802	5.25564075053381	1.47509987726677e-07	5.77297458663353e-06
TSTD2|TSTD2	395.69807755295	-0.569336298737618	0.274157750687091	-2.07667409478942	0.0378316491088789	0.104014788117606
NSUN7|NSUN7	6.87285453981052	3.37706509441646	1.59211234171556	2.12112236425323	0.0339115063709615	0.0957274375889371
MAP2K4|MAP2K4	908.984308030077	0.058809535411092	0.249575835480188	0.235637938656768	0.81371363149295	0.886646836655191
SEC11A|SEC11A	1627.30828097951	-0.438598768258602	0.244274014060543	-1.79551955186644	0.0725709604887473	0.168841116009714
SH3BP1|SH3BP1	1928.54264956332	1.16744715750072	0.410204967519284	2.84600931227347	0.00442709002096098	0.0204939113943966
TP73|TP73	232.187797907979	4.85048251545609	1.1267787705344	4.30473367292466	1.67186741635844e-05	0.000271580229634963
LCMT1|LCMT1	286.684713193741	-0.115774450057313	0.157990850069945	-0.732792120594689	0.463685227799209	0.618376291093293
TFCP2|TFCP2	531.158568538183	1.57773543732344	0.334294267644705	4.71960063341646	2.36308120177409e-06	5.72975932104622e-05
HLA-L|HLA-L	68.047929676216	-0.541105896572112	0.602048537041052	-0.898774539394348	0.368772764280455	0.52954077609576
ABHD16B|ABHD16B	47.3354645410254	0.636334320786319	0.515482058228028	1.23444513854414	0.217037077828575	0.366600297260925
SYCP2L|SYCP2L	4.56873239578483	3.02263577657063	2.20195228649898	1.37270720855469	0.169843387313011	0.309259955318208
LOC643339|LOC643339	3.38246539483717	2.49277111616284	2.35343637866714	1.05920480313754	0.289506518076555	0.448640426147802
COPG1|COPG1	2030.78181464734	0.159391609852924	0.237468066283507	0.67121281756946	0.502084964413868	0.652256845383515
SMAP1|SMAP1	1045.54693036828	-0.241780751922297	0.176862650487423	-1.36705376322227	0.171608454391649	0.311471121205879
GUCY1A3|GUCY1A3	208.216655214197	2.90889638797083	1.26115272708673	2.30653776144179	0.021080602672351	0.0671400920353007
KNTC1|KNTC1	1127.64164698579	1.13889129438449	0.322404488213008	3.53249205895684	0.000411662589540068	0.00330479861831777
CREB3|CREB3	368.223324510767	-0.441433031882287	0.280519715578964	-1.57362569319313	0.115574009715839	0.236034841275225
SNCAIP|SNCAIP	601.754924522907	23.8506517955599	2.44289858374067	9.7632590866866	1.61868075164953e-22	4.05433280266732e-19
OR2A1-AS1|OR2A1-AS1	120.282885607086	2.48789311765042	0.666895522116961	3.73055903832279	0.000191055364991304	0.0018146119796276
ZMIZ2|ZMIZ2	1239.4483813154	1.04240212426746	0.395469260615932	2.63586131231526	0.00839240249350923	0.0333491634451702
LINC01592|LINC01592	9.44164935960223	4.2665914666492	2.93636653367433	1.45301733203938	0.146218941833805	0.278195603003678
CCSER2|CCSER2	4526.72585800772	-0.333397685389677	0.209793342458861	-1.58917190356054	0.112021587860949	0.23118341303568
LUZP1|LUZP1	1215.92239777784	-1.35885331944046	0.446131336231121	-3.04585938956885	0.00232016311070755	0.0124310499974082
SNORA18|SNORA18	117.561625223672	0.0616572950370169	0.592641950787984	0.104038019844928	0.917139176794969	0.952064731661737
TGFBR3|TGFBR3	1633.29584243972	-2.01068212770236	0.47211187369468	-4.25891031286091	2.05425865598216e-05	0.000320438763481631
BDH1|BDH1	278.133164183538	1.228528598042	0.398969192486919	3.07925679770945	0.00207517723650684	0.011430751645515
GTPBP3|GTPBP3	158.765554866619	-0.0337688836160383	0.371847766954555	-0.0908137324384292	0.927640598233665	0.958529149506768
AGA|AGA	463.021603506908	0.574081004863747	0.306723077684264	1.87165898698597	0.0612537970259876	0.148892669243954
DPY19L1|DPY19L1	385.646932705496	0.221762059759361	0.436017738085482	0.508607885388104	0.611027100665497	0.743761327129142
DOK1|DOK1	261.321132355608	-0.281708362071466	0.35097316796507	-0.802649284288028	0.422177473860898	0.578802433269553
ZNF709|ZNF709	124.629181533239	-0.505489045973288	0.488216551965363	-1.03537875546905	0.300492063141672	0.459972703253268
OAZ1|OAZ1	8063.04167450525	0.194639645359019	0.345653441509004	0.563106342900246	0.573362472595056	0.712557714205353
COMMD7|COMMD7	375.560887830183	-0.688423568604345	0.318593411202444	-2.16082173829671	0.0307091121853479	0.0890838623338361
RPUSD2|RPUSD2	261.832476446982	-0.097748445038175	0.392697578865732	-0.248915323900167	0.803426281540555	0.880544494396005
LINC01063|LINC01063	3.59849396490141	0.285797885577219	1.41079320501683	0.202579573364057	0.839463657048841	0.902761715958043
TMC6|TMC6	4716.0258866773	0.817881589863602	0.362039772556221	2.25909320428764	0.023877587783112	0.0738352286774784
LINC01004|LINC01004	437.372646238615	0.522126165230346	0.489535788044882	1.06657404418914	0.286164226407187	0.444955425824513
FLVCR1-AS1|FLVCR1-AS1	26.7281698710775	3.22506169369829	0.951574631807632	3.38918418576575	0.000701009068319772	0.00492814434436671
MMP11|MMP11	7.69227455318936	2.81211419729471	1.38504764683664	2.03033751489878	0.0423222433884082	0.112805699806774
COMTD1|COMTD1	97.07971423676	0.998795768447092	0.464834568380393	2.14871232990946	0.0316572106874942	0.0910657711212199
SLC25A30|SLC25A30	489.207140989393	-0.368344661504719	0.354538847683212	-1.03894020052167	0.298832548504904	0.458593529359867
UNC5C|UNC5C	6.69162534840781	3.25961263306228	2.18069365548183	1.49475953436571	0.134977210624874	0.262950603765101
SDHC|SDHC	422.819672049305	1.18932904541837	0.210547088743547	5.64875559436973	1.6161342953016e-08	9.22986403893258e-07
HAS1|HAS1	7.73270031720306	-5.1995454312188	2.05889805012951	-2.52540208627219	0.01155659802701	0.0425944572645713
DNAJC7|DNAJC7	1159.99170669462	-0.102457191533471	0.167001824343325	-0.613509414860275	0.539539559449291	0.6840461954081
KIAA0895L|KIAA0895L	120.884595168375	1.14570103300132	0.574814695762841	1.99316586970842	0.0462432870813105	0.120646792560354
DIS3L2|DIS3L2	615.910425275692	0.552684805246933	0.24154569194116	2.28811700513196	0.0221307082005034	0.0698376002302783
COL4A2|COL4A2	224.530557370588	0.0643052974953436	1.25688395974742	0.0511624776469151	0.959196051165941	0.977222530923623
CNTNAP2|CNTNAP2	35.5520779399582	1.48361923094229	1.44259545109793	1.02843748038518	0.303744085551962	0.463493912270022
COX11|COX11	680.866378886765	0.481363651034028	0.216913960429399	2.21914555467583	0.0264768237052327	0.0795848019927729
LOXL2|LOXL2	75.3970030920419	0.715583168525255	0.475534052685553	1.50479900331856	0.132375760093462	0.259236479584348
TREX2|TREX2	9.0529635654163	1.28370165632477	1.02575953222662	1.25146451579956	0.210765051967046	0.358980343514496
C1QL3|C1QL3	79.1392408922744	1.21543759278913	0.620567181721728	1.95859147661816	0.0501606485729651	0.128314364083717
ACSF2|ACSF2	168.606714600274	0.490608264172398	0.328265488319438	1.49454719313954	0.135032656584662	0.263029393167302
PSMA4|PSMA4	1840.04722183538	0.983291167393429	0.299123456512287	3.28724192632162	0.00101173875330377	0.00653571150286386
FPR3|FPR3	76.545522968711	-1.1778223405618	0.806923967625721	-1.45964475937851	0.144387731126197	0.275707916558006
ORM1|ORM1	13.7152134756047	-0.624749554075829	0.938606774170923	-0.665613727993466	0.505658029453292	0.655299134293654
CERS1|CERS1	4.14536588470087	0.270587178007229	1.59588094170158	0.169553486689753	0.86536130501395	0.920109910467642
TBC1D19|TBC1D19	203.120423304751	1.46620611683433	0.338585954335662	4.33038080304059	1.48851703451307e-05	0.000247845861026759
CHIC1|CHIC1	684.249734659082	1.83506372084415	0.418345821214157	4.38647556109986	1.15202101930181e-05	0.000203407699208646
FCGR1B|FCGR1B	126.920708603586	1.570072102139	1.03428115173845	1.51803220961726	0.129006279013091	0.255088202316063
STON1|STON1	133.399268182534	2.02352450527295	0.698389161234162	2.89741682373344	0.00376249492365454	0.0180138311847395
ZNF252P-AS1|ZNF252P-AS1	6.92202458543862	-0.378361356606113	0.828206331014487	-0.45684431818174	0.647782948680987	0.771312627451528
TSPAN11|TSPAN11	6.89183289900431	3.0524687345682	1.9978553471894	1.52787274557312	0.126544136224796	0.251705955884009
LOC102724190|LOC102724190	6.23587257886837	-2.22143940048497	1.23904840683121	-1.79285925250182	0.0729954322303243	0.16955867955674
PUS1|PUS1	186.541716769204	0.197091897638473	0.251443528500989	0.783841599795626	0.433133060845266	0.588919888003105
LINC01010|LINC01010	5.1838852712458	-3.26274079361971	2.39712124217978	-1.36110795574645	0.173479575856406	0.313698164551399
LRRC25|LRRC25	864.129463242074	-0.811628086106662	0.674860199721045	-1.20266106438363	0.229107506814976	0.380809220825451
HS3ST3A1|HS3ST3A1	91.8322012208209	1.04343389976808	0.682935164633795	1.52786670507382	0.126545636280693	0.251705955884009
SLC2A3|SLC2A3	8464.01064545803	-1.72646727202594	0.630978861443552	-2.73617291722917	0.00621583538853981	0.0266095328561825
APC2|APC2	57.1931373241818	0.736935119115828	0.49569180445734	1.48668005500432	0.13709933288404	0.265785338727982
RPL32P3|RPL32P3	162.911090223381	0.16054581682154	0.253840298567163	0.632467806442726	0.527081238606701	0.67317273867215
BBX|BBX	2953.77806110022	-0.20824707342448	0.243076541721909	-0.856713987903958	0.391602970876328	0.550300186763183
RNF215|RNF215	58.1814173065079	-0.623428931779244	0.37225497545558	-1.67473633096849	0.0939859758235245	0.203329010752349
ZBTB7B|ZBTB7B	1326.08115233835	0.0972441901842461	0.461405059777563	0.210756661903808	0.833077157684803	0.899073113731851
C11orf31|C11orf31	624.641434964672	0.455518681247263	0.283272042931467	1.60806084685691	0.107821853167934	0.224811577071399
GINM1|GINM1	366.445959016712	-0.911983001977427	0.253186101527567	-3.60202632164676	0.000315746384640417	0.00269128894598951
SRP19|SRP19	725.788585957459	0.0401376681597236	0.232010400865113	0.172999434551466	0.8626518720841	0.918496099669067
MIATNB|MIATNB	157.653507004466	0.578913503717364	0.287726143383625	2.01202955320435	0.0442168217718387	0.116737469677104
RHOT1|RHOT1	1057.85525198686	-0.144081617031917	0.229717215884641	-0.62721296911535	0.530519643067509	0.676283328624592
ZNF783|ZNF783	541.616821757209	0.540584611500617	0.264181949158798	2.04625869868072	0.0407309248923834	0.10964767482545
C5|C5	134.666080731732	0.450289136016154	0.768496609405059	0.585935097833094	0.557919130258751	0.699775399421912
EPHB4|EPHB4	82.0797700617344	-0.425806641993764	0.349312657435302	-1.21898429080724	0.222850154949159	0.373521365168548
SLC45A4|SLC45A4	393.985660195418	-0.539211518552269	0.288827708166849	-1.86689678069522	0.061916003530084	0.150210777624597
PLP2|PLP2	1780.68561875087	-0.862841137645843	0.585047561183135	-1.47482221086595	0.140260348194694	0.270032358064957
GTF2H3|GTF2H3	507.445297254049	0.749907904743748	0.262921640817641	2.8522106526175	0.00434163185765436	0.0201968244521767
RPL37A|RPL37A	15538.473380025	-1.03917411183841	0.339658408328852	-3.05946823737187	0.00221730298174277	0.0120118067842916
SUCLG2-AS1|SUCLG2-AS1	24.4539353379699	-0.0110663339673472	1.06168565889141	-0.0104233620136703	0.991683510970777	0.996183032889583
WDR86|WDR86	46.1656946426446	-0.440388017927971	1.20867499658305	-0.364356025542813	0.715592168401481	0.820897480502354
ZNF736|ZNF736	787.328934937471	-0.163231675392814	0.791422686796024	-0.206250942910971	0.836594896487534	0.901260726274405
BRPF3|BRPF3	488.664481051817	-1.14764563272942	0.279939326321284	-4.09962275686938	4.13824126268123e-05	0.000559412367452506
TMEM243|TMEM243	854.640024491951	0.0123414918973483	0.270505678297988	0.0456237812640404	0.963610114198001	0.979987014630716
C16orf91|C16orf91	111.936512436391	-0.302077695288219	0.316134329418307	-0.95553588199057	0.339306768664285	0.500299854931537
THSD1|THSD1	46.2180603516251	0.741534138669635	0.571470227658728	1.29759015042244	0.19442820854249	0.33966817261613
NAALADL1|NAALADL1	62.4129084536819	-0.66196749260814	0.881455865397857	-0.750993349291915	0.452656658345635	0.607925057473423
EBF4|EBF4	10.6834031802221	-1.55325980095879	1.61639055478538	-0.960943378665699	0.336580638129753	0.497517200327955
NCK2|NCK2	1795.88471979965	0.290721820099024	0.47042375380465	0.617999872982074	0.536575422344295	0.681327989568548
ALG13|ALG13	967.851749178354	0.195361214663562	0.302084345269646	0.646710820082978	0.517819118985067	0.665894077019735
SLC8A1|SLC8A1	940.043329776857	0.0959422383399857	0.616558415523243	0.155609324152301	0.87634097486891	0.926611242368754
NR2C2AP|NR2C2AP	206.683750648699	0.0820625415095639	0.348029361433156	0.235792006661844	0.813594071058805	0.886614758398535
RPL13AP6|RPL13AP6	40.8255979152156	0.0233819841728971	0.561164539281201	0.0416668954222361	0.966764244657106	0.981827936838105
ZNF568|ZNF568	143.812460358567	-0.131690629296275	0.520608481280588	-0.252955213046748	0.800302822644469	0.878519245518749
ZWINT|ZWINT	297.266811384956	2.88747896817991	0.609216501535806	4.73965981042981	2.14077334196768e-06	5.28092550623239e-05
NOL10|NOL10	698.095727210053	-0.44368123530086	0.210101365338481	-2.11174846287207	0.0347080298557651	0.0973655758563909
CLCN4|CLCN4	101.198892219478	-0.0433994919830321	1.06653304384144	-0.0406921212930412	0.967541342692179	0.982332640073077
USP7|USP7	4354.72700220726	-0.329790840771159	0.179322896905616	-1.83908941056612	0.0659020362934266	0.157312322915025
GNB3|GNB3	5.96551555194659	3.33936102990683	1.67570182949968	1.99281338190332	0.0462818858688326	0.12069913802443
BTF3|BTF3	6918.94171048715	-1.08952795906549	0.266154398491315	-4.09359366308216	4.24738386638087e-05	0.000569337777746604
YES1|YES1	394.319198373836	-1.95329006674117	0.672104312782954	-2.90623052045786	0.00365811841993917	0.0176154326439971
ZNF684|ZNF684	98.2266312008683	-0.10030968388179	0.368626326882627	-0.272117525435802	0.785531654487541	0.869655016614893
NARS2|NARS2	326.566928593318	1.22646173340109	0.39271001726861	3.1230721893254	0.00178973844442135	0.0101518874623227
ATAD3A|ATAD3A	288.326378868846	0.452913968060403	0.370595633982669	1.2221244033371	0.221660585982875	0.372102475311612
EDEM1|EDEM1	6352.94867332855	0.947410031765263	0.340456055329371	2.78276745833967	0.00538974211949759	0.0239115254506962
PMCH|PMCH	10.7385857486131	2.20926669144611	1.20697733488623	1.8304127406455	0.0671882439926671	0.159706640596006
SAMD15|SAMD15	6.27657897385356	-0.411769814447652	1.20443811548641	-0.341877103649579	0.732443381190452	0.833296333944078
PLEKHG2|PLEKHG2	1108.64085047036	-1.04216723696648	0.601441334923221	-1.73278286085794	0.0831342702742579	0.186107400500327
SNUPN|SNUPN	252.199286319201	0.694049863574662	0.298821826873206	2.32262104424238	0.0201995191908531	0.0648522559921676
SUCLG2|SUCLG2	1306.35470672753	0.0339681166068139	0.350510059073251	0.0969105328863474	0.922797444148006	0.955287119590921
CDC16|CDC16	696.156633053856	1.67177638260698	0.40061152307315	4.1730611485724	3.00534239715778e-05	0.000436920963925102
HYDIN2|HYDIN2	9.65785946526	4.31275087613241	2.13874917689483	2.01648277541078	0.0437495175751988	0.115817649350138
GOLGA6A|GOLGA6A	3.52654552144777	2.26178989589006	1.70677463331619	1.3251836837389	0.185110235675663	0.328163575541092
WIPF2|WIPF2	795.020018556397	-0.793205459577717	0.221760982221957	-3.57684860352851	0.000347761448751681	0.00289330763077906
CTAGE8|CTAGE8	127.979888114861	3.0811691215838	0.658251887669039	4.68083598285551	2.85707455936914e-06	6.60858684029276e-05
SDR16C5|SDR16C5	9.3889289930046	4.53713036162906	1.83732725897849	2.46941873825548	0.0135332752101312	0.0480328331893226
SVIP|SVIP	623.474019970691	-0.490422798252626	0.293088671173607	-1.67329155469858	0.0942699141975528	0.203827155706708
RAB27B|RAB27B	451.233754464735	1.84862751436648	0.851642172323823	2.170662250464	0.0299567127231945	0.0875239200426212
SLIT3|SLIT3	8.96335505231292	1.7391517438683	1.95867060954649	0.887924562400507	0.374581331336867	0.535076949839441
MAST2|MAST2	231.792723113283	0.965871363057996	0.360601313407177	2.67850206626222	0.00739522758831504	0.0302945152583943
XKRX|XKRX	12.9619763427678	-1.31640791548653	1.15250974512949	-1.14220979132686	0.253366827017297	0.408485570399473
TPGS2|TPGS2	692.441650437822	0.543660007246082	0.200290554587513	2.71435669228496	0.00664046241738304	0.0279780436437842
ABI3|ABI3	211.344120753681	-0.609611038190596	0.649898050699343	-0.938010257969854	0.348239138491627	0.509230760231335
CD180|CD180	199.709483308987	2.42883804938946	0.732704781667012	3.3148931331709	0.000916781659142511	0.00606815043062298
NDUFS4|NDUFS4	436.183043562578	0.241377092492799	0.309020196644509	0.781104585117053	0.43474098539714	0.59041934136081
ADI1|ADI1	806.666945940845	0.137287011610726	0.275171372889475	0.498914586096383	0.617839557928859	0.748713126214803
C17orf80|C17orf80	379.828256881958	1.51762800261151	0.419911304419877	3.61416324504093	0.000301319174259508	0.00258338830429924
OSGEP|OSGEP	367.938256343922	1.06105668712572	0.242706608333115	4.3717667780575	1.23245137405017e-05	0.000214583614113422
IRAK3|IRAK3	1790.09131363437	0.184943388450758	0.530039965498766	0.348923478396062	0.72714675839499	0.829001375771007
TBCB|TBCB	984.049295778944	1.06736249840141	0.327454303376273	3.2595769467562	0.0011157850933423	0.00706502710060331
SOX6|SOX6	14.8276642612743	2.24820598060452	1.27961840494729	1.75693470171455	0.0789289399035275	0.179112176122195
ATE1|ATE1	1243.08280582153	1.14312637427086	0.277622245775168	4.11756043208663	3.82904141585291e-05	0.000525721089617456
PRKAG2|PRKAG2	495.276663451979	-0.385914151393917	0.295538952358181	-1.30579792719237	0.191621285157857	0.336229544699171
BYSL|BYSL	124.312887820829	0.514302316366719	0.447725636574223	1.14869972669402	0.250679818594215	0.405682966532433
TBX21|TBX21	211.858850790882	-2.58352797427587	0.969857894633796	-2.66382115211978	0.00772586261943059	0.0313222694871894
THNSL1|THNSL1	79.454142292992	1.82126041235036	0.818700826879009	2.22457380346522	0.0261098628730088	0.0788195980978758
CTAGE15|CTAGE15	52.8279599563271	1.88989171231196	0.554431830355325	3.40869987767615	0.000652732478012567	0.00465785858241528
FKTN|FKTN	342.159019069459	1.7852356894832	0.408775010193012	4.36728186647287	1.25802333961039e-05	0.000218385378350385
IFT27|IFT27	101.870741116775	2.15099128078288	0.510395143334375	4.21436471109542	2.504822434976e-05	0.000376324350920602
PGBD3|PGBD3	38.1426597058856	-2.56874017844621	1.17582795152599	-2.18462248249201	0.0289165380915149	0.0850517802983612
KLF13|KLF13	7051.67141498587	-0.554316085164775	0.167299602192565	-3.31331382681202	0.000921974649785886	0.00609309518835128
C8orf82|C8orf82	93.3667505170914	0.364987075020572	0.529040274465104	0.68990413894216	0.490254472844793	0.641725519709659
MINPP1|MINPP1	258.497326955804	1.08028917903105	0.438832536089787	2.46173446631136	0.0138266990355123	0.0487844650852932
A2MP1|A2MP1	65.1715296363692	4.25586077547201	1.22000900118273	3.48838473433081	0.000485948293294004	0.0037434672347644
TXNIP|TXNIP	48703.1413283794	-1.2662193862196	0.482165592521025	-2.62610896725151	0.00863671636738142	0.0340899477868749
FKBP9|FKBP9	43.6280572025823	0.569255374847137	0.711781306663909	0.799761625540877	0.423848920469498	0.580479529389915
RPS14|RPS14	20210.684846786	-1.60406635947087	0.306241597757247	-5.23791141118064	1.62403978974179e-07	6.27852647963101e-06
C2orf16|C2orf16	19.6648137317864	1.52729119682127	0.926646766003763	1.64819136358489	0.0993134085148494	0.211523565535818
PCDHGA6|PCDHGA6	46.888987649841	4.42314513803773	1.25831645446757	3.51512937968317	0.00043953979571287	0.00347607182599628
CLECL1|CLECL1	39.5722969457548	-0.941408579500965	0.692015825241527	-1.36038591194413	0.173707834265856	0.313939090149677
APOOL|APOOL	300.366889466377	-0.239864743382664	0.613811562860778	-0.390779121632593	0.69596050883376	0.807883713015249
HEXA|HEXA	1086.98534387154	-0.0270161855334782	0.233115807336392	-0.115891692812119	0.907738379508608	0.946611372623829
ZNF671|ZNF671	278.35190966747	-0.424822933612357	0.291307970638335	-1.45832924750207	0.144749812262141	0.276218813495007
RNF216|RNF216	2183.55156416444	-0.502286309683649	0.232007335508106	-2.16495874401393	0.0303908448454643	0.0884577903726677
UBE3D|UBE3D	86.7249564807774	0.225707622855135	0.292298569766533	0.772181755919689	0.44000678546988	0.59581703503579
ZNF280B|ZNF280B	67.0455296594818	-0.406800580350163	0.478995654041668	-0.849278228137693	0.3957264926685	0.55444083394253
KISS1R|KISS1R	4.33667996331382	-3.99573781065687	1.93552734849386	-2.06441816167887	0.0389780859587951	0.106266953990912
UBXN2A|UBXN2A	379.615747913361	-0.636861525674082	0.337137351934068	-1.88902689666563	0.0588882247752521	0.144603464137087
MMS22L|MMS22L	554.47436992016	1.91681567143596	0.353006150907811	5.42997810804873	5.63609652562088e-08	2.62115863086766e-06
CEP78|CEP78	622.47069915003	2.1463165857664	0.371288733390199	5.78072102045383	7.43811473161696e-09	4.81226810293137e-07
PHF11|PHF11	786.206744572944	-0.0384530979110571	0.28239688373698	-0.13616686346607	0.891689370261104	0.936424138121054
LONP2|LONP2	2070.5077840832	0.292805119846759	0.157325340125758	1.86114404464471	0.0627238377512408	0.15168786859207
PCDH7|PCDH7	3.75736363640468	1.69401996463878	2.2522406876698	0.752148726338588	0.451961624093686	0.607338606756257
FAM132A|FAM132A	9.61036622158444	-1.18482302094871	1.13647655728094	-1.04254066074486	0.297161084240403	0.456748074865169
FBXO10|FBXO10	201.310871754861	-0.437570236629926	0.409536428589675	-1.06845253824377	0.285316428700016	0.443975732554265
ASB7|ASB7	894.053893293012	-0.237903057961065	0.269003262204261	-0.884387259885418	0.376487197952097	0.536749881419265
ZNF419|ZNF419	165.296093871095	-0.249521070162541	0.445321389351431	-0.560316832133183	0.575263348342721	0.714063177883218
ZNF79|ZNF79	240.466474485632	-0.190870253273439	0.270966539357649	-0.704405251386072	0.481180436593722	0.634459351391257
KIRREL|KIRREL	15.2975569359059	0.935650406509311	3.3330541801147	0.280718631005606	0.778926217650838	0.865347444815115
POTEJ|POTEJ	7.98373235801656	3.87431561223927	1.62942060302576	2.37772592604073	0.0174197680831947	0.0580646897298413
UBR7|UBR7	850.984727134041	0.747527296191764	0.248485920873329	3.00832857477197	0.00262688955343336	0.0136879732655289
VPS11|VPS11	1024.61699238315	-0.447240514081933	0.186794067245273	-2.39429721017143	0.0166522489971789	0.0561361049158886
CPEB4|CPEB4	1763.12071171698	0.316920692779124	0.457748056040122	0.692347435663049	0.488719167423182	0.64065886416688
CXCL2|CXCL2	284.105907088651	-2.45448186618281	1.40692519048242	-1.74457169633959	0.081059451192838	0.182608390160686
FAM173A|FAM173A	71.5065752019398	0.16425283340968	0.613287382240448	0.267823598146818	0.788835105386823	0.871825888978011
RGS19|RGS19	782.055983628424	0.612347803808828	0.41501326593877	1.47548971097028	0.140080932458538	0.269805586564504
SEC1P|SEC1P	8.83608791985644	0.30349433114709	1.03609238508466	0.292922074822787	0.769581715292988	0.859903624346743
HSPA8|HSPA8	27639.7981801265	0.0801295566754099	0.328333363240282	0.244049388964378	0.807192569227124	0.882749700003532
PSMG3|PSMG3	299.589705621302	-0.623186492883844	0.27552743971927	-2.26179466378665	0.0237100927046244	0.0734987721694093
OARD1|OARD1	271.827336990596	0.257908173602969	0.193086516679122	1.33571301631367	0.18164309327298	0.324093240274691
ACP2|ACP2	311.502335600915	0.0246085830097772	0.275022781927584	0.0894783437113831	0.928701763752717	0.95939948290575
MCL1|MCL1	20621.6584436282	-0.833046990214436	0.207925421174757	-4.00647013485801	6.16329141656238e-05	0.000758855255664243
RASA1|RASA1	2242.23924998497	1.75189048962679	0.432910407836603	4.04677378486132	5.19283805173413e-05	0.000665541151762094
IGSF22|IGSF22	6.27472864900917	-2.89618839824727	1.44360405600821	-2.00622074050947	0.0448327019706799	0.117845221221056
UBALD2|UBALD2	990.257046760426	-0.723664196875381	0.428628887962188	-1.68832343595847	0.0913491588162564	0.19923379494927
SYNGR2|SYNGR2	1583.70583384202	0.0700681610519373	0.315687403157916	0.221954250790574	0.824349497595523	0.893135117394533
REPIN1|REPIN1	698.294821785114	-0.194565373952115	0.431959900982398	-0.45042461929827	0.652404296423167	0.775340915690869
GP9|GP9	49.4708242688137	6.06231189314263	1.69601617499657	3.57444226211751	0.000350975249101404	0.00290642180988701
FBL|FBL	1098.05473365054	-1.1728432306378	0.265802749041429	-4.4124571129059	1.02204044244673e-05	0.000185309566467617
HAS2|HAS2	6.88771037402709	0.289116303351721	2.87667796056142	0.10050353474231	0.919944576729882	0.953950098403419
TCEAL3|TCEAL3	50.724419958604	-1.84869845630061	1.07901705050699	-1.71331718570339	0.0866542023971111	0.191953017135635
TRMT6|TRMT6	516.939595878591	0.141870150271264	0.370437871132563	0.382979606910913	0.701734884768928	0.811577686982429
MSH2|MSH2	796.212664297736	1.74430968765157	0.443612443927688	3.93205761364057	8.42218735184163e-05	0.000963846464777943
LOC100505736|LOC100505736	41.3908367048903	2.68669867686174	0.839992887152873	3.19847788945953	0.00138155126852701	0.00834116335781134
DLEU7|DLEU7	124.073368450016	2.37678561087461	0.715013064004914	3.32411494352538	0.000886996291133803	0.00591769633654831
BOD1|BOD1	262.115979275949	-0.346482690236175	0.247442122502879	-1.40025750964104	0.161436219834918	0.298887142805239
CD200|CD200	39.8993364664594	-3.28615494478438	0.812726085233201	-4.04337328958927	5.26876355524593e-05	0.000673245660220898
MIR3620|MIR3620	6.21585543017951	-0.220053604488878	0.863374745256648	-0.254876119202982	0.798818781378157	0.877763517266263
STT3B|STT3B	5515.33437133934	0.288092084168957	0.306148345030309	0.941021203758054	0.346693993203539	0.507530004321614
EXO1|EXO1	171.417986911475	2.72659852079402	0.770295993119952	3.53967636486124	0.00040061798754986	0.00323390201460023
TOMM70A|TOMM70A	1907.59961096888	0.0312210853732467	0.237476342061874	0.131470297639636	0.895403281653462	0.93852787463197
TEX21P|TEX21P	9.9669321968888	2.5364235260648	1.15900248525756	2.1884539147482	0.0286365547008098	0.0843981700402248
SDF4|SDF4	1446.02783158598	-0.411054137619948	0.307072121949736	-1.33862408287012	0.180693081983815	0.322846408480815
SLC43A2|SLC43A2	1024.4921794152	-1.7374708476411	0.624163003728381	-2.78368124554399	0.00537458246314736	0.0238503048155815
RASGRP4|RASGRP4	411.06710689574	0.043152200933272	0.738469241217734	0.0584346625759445	0.953402405190008	0.973558786848946
AMER2|AMER2	3.52016132584672	3.00551518615095	2.157866154273	1.39281816909702	0.163674782692961	0.301529603397972
C3orf35|C3orf35	86.7510348274902	0.120347067490021	0.495867126596711	0.242700233661384	0.808237626428153	0.883468223451671
DOCK11|DOCK11	7343.0413252559	1.18673197132968	0.287448369533537	4.12850479289714	3.65129830195795e-05	0.000506874213208462
GABPB1-AS1|GABPB1-AS1	413.820193179103	0.24769090866009	0.38024007331089	0.651406640292682	0.514784025294801	0.663021252882814
NFKBIA|NFKBIA	8705.97782917409	-0.952792339733857	0.580870291352749	-1.6402841631218	0.100946096895419	0.214116971764151
LARS2-AS1|LARS2-AS1	10.8916013821915	2.27259371322346	0.991674758131017	2.29167244057574	0.0219245518664612	0.0693489409056868
ECE1|ECE1	2674.92696841676	-0.223814481551727	0.306054658460079	-0.731289249697601	0.464602495453998	0.619222771022041
KCNK1|KCNK1	109.89179839404	3.3668183671616	0.837190015952155	4.02157013701655	5.78114885332971e-05	0.000721429771141849
C8orf31|C8orf31	11.6115308091002	0.692138583449767	1.4593454494793	0.47428015326784	0.635300142344708	0.762038543868767
PALM|PALM	3.96307543415138	2.90793840443598	2.33766608994745	1.24394943184608	0.213518174697727	0.362296927995282
MEX3A|MEX3A	6.17310503637236	2.64935824319601	1.69267091465872	1.56519393123157	0.117537444073096	0.238654777873028
MTCP1|MTCP1	76.8957593286126	-0.112273688433777	0.404346625962506	-0.277666935309578	0.781268044633422	0.866905425388127
SNORD57|SNORD57	7.31111743635181	-0.0404857644119178	0.806418237593128	-0.0502044256002362	0.959959484884333	0.977464989167607
CCDC90B|CCDC90B	643.868498156975	0.340174970988318	0.244217855725863	1.39291605020956	0.163645178297074	0.301512285737979
RPL13AP20|RPL13AP20	69.5386154546449	-1.9721411068772	0.501916032171442	-3.92922517008496	8.52200129187476e-05	0.000970865813193244
PHPT1|PHPT1	319.344120123948	0.783989280347689	0.384514111269237	2.03890899545879	0.0414591109682989	0.11107924703655
LATS2|LATS2	366.600658296323	-2.67046247433992	0.511732064867517	-5.21847790607234	1.80399492919523e-07	6.89094620775163e-06
GPM6A|GPM6A	3.57640297643622	1.8194644894904	2.10979416954403	0.862389571340801	0.388473177362889	0.547754473652912
LINC00907|LINC00907	4.88272908109906	3.2973847987949	2.03316561090402	1.62179843152509	0.104846514398176	0.220258080151356
TMEM75|TMEM75	36.8921567496685	1.01619952806429	0.749895639290853	1.35512126597411	0.17537892428313	0.316089502411196
PTGDS|PTGDS	154.975188559966	-0.192834524861361	0.870725324392483	-0.221464243038876	0.824730975279496	0.893475543102781
PLGRKT|PLGRKT	340.755428738895	1.36124342619017	0.272627050062677	4.9930607614953	5.94298502652666e-07	1.87407115953403e-05
TSR1|TSR1	716.329978625082	-0.528275194684382	0.206641027392803	-2.5564874572569	0.010573488289643	0.039824913035942
ZNF160|ZNF160	838.429658589072	-0.536508872893151	0.285074348806588	-1.88199631127511	0.0598365164769369	0.146521473393387
CHERP|CHERP	447.425312128222	-0.102423336778084	0.298984097463867	-0.34257118571486	0.731921082227327	0.832988597915639
ASB13|ASB13	137.753782725609	-0.908760208769006	0.513544431055498	-1.76958439000344	0.0767964011571812	0.175687800298651
TRAPPC6B|TRAPPC6B	479.496376817247	1.22368417274253	0.371983336417288	3.28962093982029	0.00100322433071264	0.0064906022842748
FAM127B|FAM127B	38.2764626927023	-0.764556786381056	0.601448631527894	-1.27119216222807	0.20366029422408	0.350611965001268
MKNK2|MKNK2	3590.88931525366	-0.40051921387598	0.370849772720762	-1.08000393511784	0.280140427845752	0.438466534674127
HSPB8|HSPB8	6.64630748401637	-1.47436280044249	4.463761492442	-0.33029605254198	0.741176275347643	0.839798606415291
TMEM259|TMEM259	2464.52381009209	0.462274192139722	0.468560089661286	0.986584650164916	0.323846298252904	0.484801668994891
RPE|RPE	556.13245706498	1.18089625190283	0.45791613165487	2.57884833110197	0.00991303000650039	0.0378861950868829
ALOX12P2|ALOX12P2	81.4714514344832	4.77973910638772	1.21635065577265	3.92957333783943	8.50967204697423e-05	0.000970091547461633
ELOVL1|ELOVL1	614.810765857013	-0.361682707202126	0.293332343546883	-1.2330133896207	0.217570768680737	0.367284743416764
DNAL1|DNAL1	150.423483344118	0.526768903253752	0.28790502569431	1.82966206297858	0.0673004870428492	0.159875904765763
FRA10AC1|FRA10AC1	211.686937630517	0.675135194995194	0.321583101346485	2.09941129421405	0.0357806599422607	0.0997364564018534
ZNF22|ZNF22	625.682387392735	-0.209065621035064	0.331003719472988	-0.631611092974819	0.527641036165105	0.673740462244759
PNPLA3|PNPLA3	5.0731451251528	-1.28612480042781	3.0353517151783	-0.423715246571437	0.671773494579155	0.789216613810128
SYT10|SYT10	16.8133096448217	5.48301693887973	2.09157993502657	2.62147138010773	0.00875511130684792	0.0344177951890055
SEPT4|SEPT4	18.1584903363944	4.4395027844793	1.27538942529124	3.48089979142295	0.000499732417048842	0.00380920288548134
SRD5A1|SRD5A1	184.060025738092	0.389383499276581	0.395599292253027	0.984287653951437	0.324974098116392	0.485743466519583
ST20|ST20	50.9992774770585	2.10842349346132	0.584749661290612	3.60568570284894	0.000311329760658665	0.00265881378160174
SNORD99|SNORD99	6.25968176916232	-1.4431338702939	0.658700974696725	-2.19087860156628	0.028460578623101	0.084077392586155
DAPK1|DAPK1	697.025334011659	0.389382284006848	0.690440726585582	0.563961928973179	0.572780042036887	0.712035768365907
RUVBL1-AS1|RUVBL1-AS1	7.88852060704474	1.67968118452221	1.07143733958143	1.56768960952807	0.116953587739648	0.237910111827271
MTIF3|MTIF3	463.083398269067	1.19702975609684	0.36483216770459	3.28104224917495	0.00103424250841671	0.00665689203379963
TOR4A|TOR4A	139.912542451289	0.195984648056059	0.638349352776454	0.30701785347418	0.758829782963867	0.852255626462462
SRRM1|SRRM1	2342.57709068328	-1.14483883297166	0.240965635118323	-4.75104606683647	2.02367018419448e-06	5.05427483468401e-05
RGS6|RGS6	130.881512946325	8.30164913645573	1.44715868073575	5.73651614502641	9.66438411984711e-09	5.96639601314364e-07
PPFIA4|PPFIA4	12.9865811258247	1.21731647909967	1.29834159942762	0.937593372681221	0.348453418502299	0.509431522197566
PAAF1|PAAF1	116.25123176986	0.57238077373846	0.328654983225298	1.74158556222494	0.0815809895077448	0.183473510651525
SPIRE2|SPIRE2	17.7940128968733	-0.676631788996418	0.642311918513945	-1.053431782119	0.292143144308393	0.451728172604203
FGF11|FGF11	46.3971544159067	1.29519553788562	0.627878026485664	2.06281392762706	0.0391303102605057	0.1065659723202
MIR631|MIR631	4.19890153331404	-0.489307661945366	0.924673821809437	-0.529167854009179	0.596689014280411	0.730875261099515
LINC01176|LINC01176	21.3074966635275	1.47719140258216	0.790394057014771	1.86893030061657	0.0616325120414036	0.149647255729391
CHM|CHM	546.427427335307	1.88755655989113	0.395886285841124	4.76792611262276	1.86132017763844e-06	4.72964154703403e-05
BIVM|BIVM	499.25309259091	3.68054499911753	0.586365397280329	6.27687959792405	3.45435371267159e-10	3.69299900269945e-08
PPIAL4G|PPIAL4G	3.61023592879561	-0.830996029945881	0.984056104197778	-0.844460012392612	0.398412399477791	0.557135476156014
AR|AR	47.4665883467319	6.85522635014754	1.67410580232574	4.09485848542186	4.22426328340102e-05	0.000567691807154582
F2R|F2R	349.219327295609	-0.852066915565999	0.674217721275425	-1.26378599772509	0.206306848297053	0.35420022773238
DEGS1|DEGS1	1379.21600169377	-0.0978645908365609	0.374960139810189	-0.260999984921335	0.794092518883768	0.874910066282131
MYCNOS|MYCNOS	27.9568943081297	6.05963054730934	1.61687214291968	3.74774874676677	0.000178428853557209	0.00173199232507284
GTF2H2|GTF2H2	31.7705761632791	-0.318525173875961	1.8802787414545	-0.169403167122745	0.865479532506265	0.920109910467642
AGTPBP1|AGTPBP1	3652.97133928409	-0.495173803662387	0.300919217047601	-1.64553732566723	0.0998590518701197	0.212376122809171
ZNF563|ZNF563	60.0725923898833	-1.13003564385606	0.836062395010035	-1.35161639920726	0.176498061427907	0.317616802937031
SNORD45A|SNORD45A	29.8375741231534	-0.480117876528741	0.489742922367968	-0.980346738258741	0.326914991149323	0.488128895867017
GPALPP1|GPALPP1	401.741208324414	0.593171791752505	0.325429988337281	1.82273242482414	0.0683439268162557	0.161688580335908
CDK4|CDK4	531.716473960374	1.10329067530291	0.289425468079597	3.81200273294363	0.000137845352180648	0.00142250886391012
FAM71D|FAM71D	3.91182729557538	2.80976330205304	2.03431839992065	1.38118167842489	0.167223106670985	0.305858500608357
HSD11B1L|HSD11B1L	25.3280383169316	-0.651006455427263	0.690159111483817	-0.943270101915518	0.345542764515297	0.506640014237056
MLXIP|MLXIP	956.394897560632	-1.20084342613714	0.319977167076471	-3.75290348717335	0.000174798165572521	0.00170297930797929
PKM|PKM	10601.0936069906	0.833311358522555	0.332206195286996	2.50841606913035	0.0121273774816339	0.0442332659424769
RBM26-AS1|RBM26-AS1	25.2778734542602	1.67979019052203	0.640062244789236	2.62441692850539	0.00867974630155092	0.0341982004281106
PIGC|PIGC	510.090581829582	-0.534924903283858	0.288060001258898	-1.85699125510691	0.0633123982447029	0.152879256083787
KLHDC7B|KLHDC7B	166.267987661571	0.30005996761315	0.520104371074079	0.576922603041174	0.563991740754258	0.704808780516351
ACY3|ACY3	7.62021626763867	-1.69797242462288	1.38260469855938	-1.2280968134942	0.21941062708662	0.369293128992004
USH2A|USH2A	8.66742850935969	3.03458419630663	2.19824175674484	1.38045971831608	0.167445144030303	0.306069194149635
TAS2R19|TAS2R19	57.1075451304317	2.07499667190422	0.734916018234392	2.8234473333284	0.00475102310232822	0.0216926270971668
C12orf45|C12orf45	135.779372354276	-0.620501719741119	0.307704558794965	-2.01655029802332	0.0437424642319878	0.115817649350138
ZNF630|ZNF630	40.3027542841855	-0.238208944297813	0.630619135203367	-0.377738211545061	0.705625078553386	0.813768631340953
MIR1291|MIR1291	54.4364255573512	-3.14811082648505	1.17680543452554	-2.67513280796013	0.00746996521568614	0.0304867085955831
LOC101929567|LOC101929567	6.52262914652526	1.6673726086276	1.59894708366365	1.04279411474154	0.297043657654116	0.456607614382747
ALG1|ALG1	290.838737801591	1.10982473681087	0.275312282018836	4.03114866025097	5.55049210015493e-05	0.000700624751562393
ITIH5|ITIH5	8.97945409599925	1.16365055866355	2.29851183118424	0.506262592550595	0.612672319635488	0.745286683184291
GTF3C6|GTF3C6	483.734452597622	0.872627616511831	0.280319385742679	3.11297634375121	0.00185210862678318	0.0104482048112579
LOC101927391|LOC101927391	7.06940987802819	3.73144471501287	1.31305478117044	2.84180429371476	0.00448590196141083	0.0206813881381583
PDCD1LG2|PDCD1LG2	54.0925815328951	2.86691919493439	1.01985338747654	2.81110915562883	0.00493710332898804	0.0223617237579817
EIF4G2|EIF4G2	16783.8405010346	-0.317115824252334	0.218961047555354	-1.44827505984673	0.147540139800682	0.280049937330883
LOC729083|LOC729083	3.27749745850812	2.41392239026787	1.71614545261112	1.40659545296413	0.159547382175572	0.296360234313412
TJAP1|TJAP1	449.0255699243	0.0356087050704504	0.34467066269241	0.103312259860736	0.917715145724935	0.952376780154845
BOLA2|BOLA2	264.529480680158	0.461406903840106	0.292337938753436	1.57833398500243	0.114488902324541	0.234646937993099
ANO9|ANO9	990.537239160557	1.2563740936587	0.526941039531612	2.38427831465826	0.0171126548897041	0.0572996554937864
COQ3|COQ3	49.993882427852	0.710556704037916	0.422199145408608	1.68298944174847	0.0923771353664544	0.201088854912257
AKIRIN1|AKIRIN1	2273.84963618108	-0.862007267095102	0.242524114573376	-3.55431569603484	0.00037896401903691	0.00309273373939438
NHS|NHS	30.3192122776443	-0.3927928447827	0.707779723293812	-0.554964817238265	0.57891872553255	0.717316992021621
DPM1|DPM1	648.943732729896	-0.32638455716611	0.288605645256323	-1.13090150012912	0.258096551845455	0.414396231090326
DNAJB11|DNAJB11	984.58955900869	0.163245237443796	0.326645046290338	0.499763395458616	0.61724168781577	0.748260977146781
UTY|UTY	1518.98568639214	-0.24907225185023	2.33042049076628	-0.10687867397198	0.914885231972511	0.95068647717119
SIK3|SIK3	1246.34303124004	-1.14188155374961	0.24084105119556	-4.7412247541737	2.12430113132753e-06	5.26064572536236e-05
LHFPL2|LHFPL2	485.003925422879	2.38728486243557	0.674494083866341	3.53937109240625	0.000401081602579909	0.00323615450438727
PRICKLE1|PRICKLE1	23.377205452511	1.82456680898394	0.83532595026855	2.1842573050644	0.0289433461674254	0.0851163516191664
LOC102724009|LOC102724009	13.9051012732524	-0.197570014665217	0.587148081549338	-0.336490948150386	0.736500676375023	0.836467074686646
RAB27A|RAB27A	2063.69842608994	1.70504216850716	0.454512117626001	3.75136790062476	0.000175872408868497	0.00171119364300297
CRELD1|CRELD1	282.138422976792	1.12182847998491	0.383443395602094	2.92566906315697	0.00343716359181903	0.0168146733413401
RHNO1|RHNO1	702.347617203923	0.229016742546589	0.333227878592568	0.687267654536804	0.491914077793812	0.643060656573137
TNFSF14|TNFSF14	153.777164208839	-0.512115789453837	0.605730933748368	-0.845450943515094	0.397859111409713	0.556583722999002
PDE4DIP|PDE4DIP	2491.0836588396	1.16816839249134	0.393387325730889	2.96951202055367	0.00298273142476912	0.0150406183694211
LARS|LARS	2054.28135861234	1.89063565824469	0.378486739715759	4.9952493967544	5.87597818142855e-07	1.85963042337521e-05
SEPHS2|SEPHS2	522.310824810553	-0.153882122179254	0.228965688213495	-0.672075031765326	0.501535930849754	0.651751369373609
EFCAB5|EFCAB5	24.1358229913412	0.367703493731371	0.590781415348763	0.622401931032818	0.53367761100503	0.679163636521224
NGLY1|NGLY1	901.635833230239	0.514279549310738	0.288458165898125	1.7828566153068	0.0746096469322576	0.17221313055072
MDP1|MDP1	99.3907684063759	1.10366436975424	0.308662109175994	3.57563930571391	0.000349373075555308	0.00289761501121628
MRPL27|MRPL27	232.253720911342	1.06521098048957	0.336930261945484	3.16151768125215	0.00156949289668505	0.00919409253510825
SLC46A1|SLC46A1	93.667689906585	0.296567096822659	0.587161209124292	0.505086324188493	0.613498206318947	0.745527034335327
HLA-DQB1|HLA-DQB1	1853.3588430713	-1.90463800036201	1.06118577697895	-1.79482051275155	0.0726823015004344	0.169055292147402
CTBP2|CTBP2	277.139282468954	0.426701103841761	0.534703160591468	0.798014927328578	0.424861827690002	0.58149988079252
EID2B|EID2B	62.0268678251432	-0.617412942888792	0.305794607299265	-2.01904457485924	0.0434825867447159	0.115302509587886
FBN2|FBN2	204.010511530981	0.362725734089758	0.971822575438903	0.373242753622944	0.708967778705535	0.816000948116008
MTA1|MTA1	837.543206068521	0.407683878873624	0.428517320717872	0.951382497656462	0.34141024184215	0.502213675523984
IKBIP|IKBIP	228.634170748954	0.632781128317582	0.389267268273148	1.62556983309873	0.104041196972008	0.219150714541716
ANKRD13D|ANKRD13D	1427.54672111495	0.429381365658393	0.405819719290813	1.05805939250255	0.290028365983569	0.449290275736872
MESTIT1|MESTIT1	6.67129197835845	2.39448469886378	1.54538658402077	1.5494405889262	0.121275842953176	0.243845109460785
SPC24|SPC24	49.9394631644925	6.23929738810966	1.27752258416239	4.88390378804963	1.04005838627107e-06	2.96995931468978e-05
CYP4F12|CYP4F12	48.992039661724	6.7397758966501	2.46691716308341	2.73206413150331	0.00629388884800264	0.0268558659459796
SNORD88B|SNORD88B	4.60124524843824	-0.250742373430424	0.8183589905326	-0.306396552529151	0.759302732908087	0.85240967639682
DOT1L|DOT1L	779.462691908135	-0.144898799097327	0.36189210844138	-0.400392259785346	0.688867624319163	0.802572666435503
ZNRD1|ZNRD1	300.058096731629	-0.0320894699529377	0.31106918604671	-0.103158626416051	0.917837076004679	0.952416772512046
RELT|RELT	802.73356334628	-1.40765412599435	0.526271849432547	-2.67476614512472	0.00747813934374796	0.0304987711360625
PDC|PDC	8.08296503518739	3.54802336627847	1.54510636918812	2.29629715923234	0.0216588964261779	0.0686452333767492
SF3A1|SF3A1	2766.11686441926	-0.829392450827162	0.216001648215449	-3.83975056523592	0.000123159376202093	0.00130790632522792
STAM2|STAM2	741.732594001456	1.07512656483445	0.294070126856428	3.65602101895699	0.000256160360565011	0.00227867052348368
SUV39H1|SUV39H1	277.461141885155	-0.458468527265813	0.349940418399372	-1.31013310598087	0.190150810625159	0.334663136186601
EMG1|EMG1	415.429254057813	-0.194693045122811	0.279824586063857	-0.695768187711646	0.486574014815058	0.638989081575387
SNHG7|SNHG7	683.49218960705	-0.957827339832041	0.318104552671985	-3.0110456822657	0.00260349680701008	0.013599496064485
ZNF516|ZNF516	528.341626228879	-1.08350279976259	0.586477234785258	-1.8474763136532	0.0646781379198835	0.155278898007575
LOC100506127|LOC100506127	87.0650847463594	1.54966000393861	0.500555852433218	3.09587830489977	0.00196230879233406	0.0109361602212311
UNC13A|UNC13A	4.36559102657403	1.94589305402195	2.11479023668119	0.920135255152166	0.357502082989471	0.517986121068232
RXFP1|RXFP1	196.609287974828	22.2688588507626	2.87965729977363	7.73316284979923	1.04906957953279e-14	3.6786673875897e-12
MTMR14|MTMR14	1593.42637179552	-0.243147584271582	0.249815415745285	-0.973308967127547	0.330399767074739	0.491715399042645
ZNF788|ZNF788	14.1334976679339	-0.165865774374709	1.2383292058089	-0.133943198300295	0.893447490732595	0.93753005476424
TMEM110-MUSTN1|TMEM110-MUSTN1	223.357508662989	1.66547452106704	0.843970093994609	1.97338096802003	0.0484521743010675	0.125140950143136
CSNK1E|CSNK1E	921.58782375528	-0.643378051137359	1.4885658283419	-0.432213368658351	0.6655863438825	0.784730372355045
BCAS1|BCAS1	2840.39760306912	7.70695531676868	1.02614174984493	7.51061470594423	5.88503634190467e-14	1.84254182468955e-11
NOP58|NOP58	2350.02895484914	-0.0256697517621832	0.430718800961067	-0.0595974721904548	0.9524762316918	0.973009716847423
CD79B|CD79B	207.156101789309	0.27926956079801	0.654838566860018	0.426470850880272	0.66976478381281	0.787538458493058
RIC8B|RIC8B	379.486221947781	1.34202667355831	0.359031468478498	3.7379082096774	0.000185557662679443	0.0017787766537773
CEP162|CEP162	427.28609953242	1.66657264658563	0.462410785292671	3.60409553494911	0.000313241831014754	0.00267253967064802
TRA2A|TRA2A	1544.78440222505	-0.37220087077872	0.342322186556566	-1.08728234802046	0.276912047296797	0.435044706564046
RNVU1-18|RNVU1-18	1116.98754356885	6.76368745885799	1.76431683803992	3.83360137648075	0.000126280722620826	0.00133057686881667
TRIM40|TRIM40	7.15684594938365	2.44679582286659	2.69310954828553	0.908539284792278	0.363593367994436	0.524163996139323
ATP6AP2|ATP6AP2	2150.48777256163	-0.746685459632544	0.24262355295972	-3.07754729713527	0.0020871171473598	0.011474890230373
THOC2|THOC2	2204.77441014614	1.06992792712968	0.285038503897544	3.75362595754522	0.000174294887631434	0.00170056330820363
ECSCR|ECSCR	17.9210550527195	4.08872688790933	1.91969230001521	2.12988659061503	0.0331809774704649	0.0940900056756858
BEND6|BEND6	14.4207045564809	4.83975717463255	1.66446327258607	2.90769838802934	0.0036409931672081	0.0175459193149416
BRIP1|BRIP1	436.115480921245	2.0324076846338	0.540371089529969	3.76113327306546	0.000169145272952589	0.0016576993128439
AK1|AK1	763.747185253697	2.52033314806555	0.630367215993874	3.99819832649742	6.38264619952755e-05	0.00078147301547707
CCDC101|CCDC101	295.75268869512	-0.585062073469574	0.398716617433458	-1.4673631544018	0.142277292069394	0.272610412107904
SLF1|SLF1	485.828047314745	0.061961473788747	0.435799609725501	0.142178818902052	0.886938761880214	0.933639367918216
NUDT5|NUDT5	619.960277041563	1.62446620147976	0.347795009285513	4.67075765352975	3.00090815778636e-06	6.8419925527267e-05
SH3GL1P2|SH3GL1P2	17.9803853755529	0.230287052256728	0.695689009497517	0.331020109722676	0.740629295690031	0.839567326783399
SGMS1-AS1|SGMS1-AS1	54.5893254062847	-0.637932432652351	0.451532380530615	-1.41281657785581	0.157709662574716	0.293849470129915
FAM87A|FAM87A	21.1632909670134	0.70810410349199	0.560612386502207	1.26309036428898	0.20655670648035	0.354449382967481
ASTN2-AS1|ASTN2-AS1	7.61682611066927	4.05911439114753	1.65629481487949	2.45071973581156	0.0142570913260292	0.0499339956490751
RANBP1|RANBP1	768.152567016951	0.462080695475002	0.237425410382381	1.94621415934717	0.051629019773095	0.131171271654404
EIF4E2|EIF4E2	1000.67242376355	0.651411372735945	0.213376632234804	3.05287118797113	0.00226663211685463	0.0122091738570852
LOC102724450|LOC102724450	3.70332836611466	0.261589714184953	1.53144059614139	0.170812837823454	0.864370934308611	0.919600460633063
ZNF675|ZNF675	459.099455147259	-0.594878774210325	0.359852733224457	-1.65311728739676	0.0983069956670769	0.209889984782131
CD8A|CD8A	543.462567174797	0.809375349825351	0.939499313216714	0.861496478431861	0.388964659879061	0.54826504548049
HDC|HDC	18.3655363404754	-3.77819727530733	1.35802752961426	-2.78212126994253	0.00540048562618068	0.0239349632163361
NUDT9P1|NUDT9P1	9.29497298784035	-0.166937541950309	0.827510420182785	-0.201734670499297	0.840124156660264	0.903065222164454
PLEKHM2|PLEKHM2	1460.85583462967	-1.2266938840224	0.364651672188883	-3.36401551831359	0.00076817223788712	0.00529833353535597
TWSG1|TWSG1	152.926281048354	-0.62354602648061	0.365013776699693	-1.70828080002476	0.0875842521322367	0.193420851644144
YTHDC2|YTHDC2	1416.35153866772	0.234774256482778	0.308211881982963	0.761730063657169	0.446221128384369	0.601537370749127
UQCRH|UQCRH	1496.10155048418	0.0246442242532031	0.267545896238534	0.0921121370190301	0.926608945503577	0.957801830062151
TAGAP|TAGAP	6591.87894615007	0.338899000383488	0.332261939086232	1.01997538844054	0.307740133266253	0.467881352459002
GLRX3|GLRX3	703.096854776014	0.602550671597414	0.245624233344849	2.45314016207615	0.0141615146725701	0.0496786388063568
TMEM87A|TMEM87A	1658.31876151483	0.229155578116491	0.199087751011307	1.15102801127868	0.249720711916512	0.404578935689541
SCARNA22|SCARNA22	248.749795737868	0.591426823691194	0.593782737566882	0.99603236381485	0.319234420593881	0.480070082877821
PI4KB|PI4KB	1541.6761762675	-0.697858542285764	0.186629509529036	-3.7392722300285	0.000184553782173863	0.0017733148973028
KANSL1-AS1|KANSL1-AS1	40.8819907128887	-0.433702013654839	0.519859615483178	-0.834267561352576	0.404130227044406	0.56284178813008
TMEM176B|TMEM176B	350.498787783334	-1.26084588070302	1.25992564282463	-1.00073039062554	0.316957170649452	0.478121833691545
ZFHX4|ZFHX4	1667.16907261847	11.9007586678277	1.78657053365679	6.66123080148927	2.71543811478047e-11	3.83949810213274e-09
MARVELD1|MARVELD1	137.176760907759	-0.113162416589606	0.642887643125158	-0.176022074463134	0.860276600293633	0.916579340845179
BTBD6|BTBD6	823.755967847599	0.217776669827811	0.392612368322262	0.554686218262632	0.57910930444589	0.71736070615019
TTC14|TTC14	2015.27573092873	1.21820095914024	0.381226584845976	3.19547746029419	0.0013959968645093	0.00839657393668666
FLJ38122|FLJ38122	12.2662447970745	-1.98650407047894	1.00111231855707	-1.9842969002141	0.0472227515495566	0.122533151238475
F12|F12	9.2677716689042	-0.00254868123678796	1.1581230601416	-0.00220069984313787	0.998244096989529	0.999269983015553
PARGP1|PARGP1	246.431459588233	0.287013020300576	0.316683635084866	0.90630834215245	0.364772671278311	0.525475248173743
MRPL54|MRPL54	485.381671877211	-0.17670144687198	0.372126748646981	-0.474842100210345	0.634899522907322	0.761714337972772
C17orf75|C17orf75	222.418505131084	0.930725730332918	0.297518554261471	3.12829474666969	0.00175823765783442	0.010028360720498
HNRNPF|HNRNPF	5173.14681561767	0.46520297048974	0.237588501421871	1.95801971772913	0.0502276990456769	0.128406974689118
TMEM81|TMEM81	29.1331690176583	0.528477052110848	0.424113939548091	1.24607329029072	0.212737489618708	0.361251952105067
LINC00092|LINC00092	6.14465730459138	3.18345406152592	1.46881927705236	2.16735585600054	0.0302077305066492	0.0880372571431317
IRAK1|IRAK1	1801.24389956321	-0.740480590268685	0.30677461849012	-2.41376093600303	0.0157888179925389	0.053804731946197
CSF3R|CSF3R	1699.17031079283	-1.29062643940332	0.821187329448345	-1.57165897855528	0.116029660485254	0.236629171977448
CILP|CILP	13.3891065118021	-1.57938581275762	1.16084370431141	-1.36054992320821	0.173655965993542	0.313919997088852
WDR89|WDR89	513.511100629655	0.168551950908144	0.310941488033791	0.542069673538793	0.58777050937004	0.724150118809986
LOC93622|LOC93622	383.790027397343	-0.136020228924069	0.223053834530116	-0.609808969258962	0.541988359310156	0.686066482285506
PMPCB|PMPCB	1785.37237329761	0.416768507227917	0.203403421323678	2.04897491161031	0.0404645682364949	0.109131714334789
PRSS1|PRSS1	12.5487144058166	3.80536530705155	3.94063563088597	0.96567296839774	0.334207849921247	0.49519701112729
ZGRF1|ZGRF1	474.519175295894	1.06882907389878	0.417604035790087	2.55943185960021	0.0104843407292565	0.0396253386518762
SH3TC1|SH3TC1	739.984008857981	-3.06650311018847	0.501971811027962	-6.10891496856913	1.00310750714588e-09	9.30554704909451e-08
BTN1A1|BTN1A1	4.35702293293945	2.6813972972246	1.82567851427946	1.46871274227756	0.141910719842565	0.272282846465277
RAP1GAP2|RAP1GAP2	1268.30131644356	0.782102164498684	0.394489392661509	1.98256829980158	0.0474156712269985	0.122979136630616
PHKG1|PHKG1	74.5175709386301	-1.27868262847112	0.515099672472356	-2.48239844986456	0.0130501258947002	0.0466764294801668
IFIT5|IFIT5	1153.87620117475	-0.0332786658089336	0.55666834657525	-0.0597818539776359	0.952329378152877	0.972916384288218
PDZK1P1|PDZK1P1	34.9498757623007	1.42764725674193	0.771105181581703	1.85142998755827	0.0641077182950673	0.154264881214685
APOBEC3A_B|APOBEC3A_B	190.32144534764	0.306485661514341	0.932629842865671	0.328625192362073	0.742439003984655	0.840860759932838
SLC22A1|SLC22A1	6.22297176111988	1.96877710901331	1.51565497797904	1.29896126599898	0.193957222353569	0.339059234980687
TNFAIP1|TNFAIP1	390.502521793285	-0.487952889678863	0.297608006156721	-1.63958253670739	0.101091996548114	0.214296454537308
STXBP1|STXBP1	31.8062830367294	-0.138237822905677	0.853220806778229	-0.162018813661688	0.871291038451498	0.923738648694705
FCHSD2|FCHSD2	801.860254792315	-0.145050227634907	0.307460828270015	-0.47176815482824	0.637092283615393	0.763134942903555
KIAA1143|KIAA1143	1641.42688260181	1.36846936952099	0.286769808957504	4.77201339463101	1.82393370947992e-06	4.66847149318416e-05
PRKAR2B|PRKAR2B	629.233245389477	1.49941352583695	0.915097229447619	1.63852919404209	0.101311349160617	0.214544997329047
SCAMP2|SCAMP2	933.752970608566	0.0211695585986337	0.281406624343048	0.0752276484182084	0.940033586420626	0.966153283938849
MTO1|MTO1	975.339317899291	0.249991132456355	0.292950939201562	0.853354944475364	0.393462499060856	0.552300640279463
ZDHHC16|ZDHHC16	276.293355145141	1.10245459447817	0.337811103352318	3.26352385560392	0.00110035920167635	0.0069875399793522
C1orf174|C1orf174	406.708805803199	-0.628423758144169	0.25557270974934	-2.45888443551157	0.0139369472303219	0.0490774243400752
H2AFB3|H2AFB3	8.59565406403097	1.86531018809668	1.17790614793384	1.5835813331721	0.11328902461108	0.233015817176186
CLCN7|CLCN7	1103.92731497881	0.402528798267464	0.377680901710684	1.0657907149772	0.286518259104686	0.445387413501414
RAB43|RAB43	598.818385199692	0.643793796600246	0.764295726647299	0.84233598874659	0.399599911921167	0.558261773363651
ILK|ILK	1254.44379191702	0.524039683263662	0.321348071402675	1.63075409469938	0.102942217247013	0.217456131926733
MAP1LC3A|MAP1LC3A	151.693958696334	0.927217610654443	0.565603071840146	1.63934330773313	0.101141781385091	0.214376070239942
ZC3H12A|ZC3H12A	1613.65687233432	-0.833558208045143	0.501744414613818	-1.66132035308597	0.0966491244440899	0.207543796038901
MAGEF1|MAGEF1	266.253075585099	0.984140619436768	0.493093063186209	1.99585168178511	0.0459500693847438	0.12004806534387
E4F1|E4F1	697.858892969946	0.8819715501256	0.380990113479442	2.31494602857507	0.0206158859311297	0.0659234594255877
DHX40|DHX40	1214.09463417349	-1.17313714983377	0.214446543868004	-5.47053418849153	4.48681140327487e-08	2.16118858059391e-06
MIR3680-2|MIR3680-2	4.78960295700357	-0.982951964034725	0.850985727812709	-1.15507455872522	0.248059895540143	0.402483263789129
TMIGD2|TMIGD2	36.8747772860621	-3.59083048391749	0.953621560662552	-3.76546696513727	0.00016623810270563	0.0016386738593664
ACVR1C|ACVR1C	37.8976028311672	-2.751742741106	0.933481004960481	-2.94782938965372	0.00320013624704121	0.0158541929413319
BRD1|BRD1	2155.46614064788	-1.59462140698785	0.341976887945692	-4.66295081099481	3.11707278182485e-06	7.04273673759473e-05
SHARPIN|SHARPIN	393.950565165617	-0.000230196933799532	0.400435265671884	-0.000574866785055227	0.999541322692949	0.999997604038544
HEATR5B|HEATR5B	1779.47129511156	0.740432846128285	0.284206331701508	2.60526513148179	0.00918031902019639	0.035728864235539
ZMPSTE24|ZMPSTE24	879.257012940815	0.458754271672478	0.230783671817952	1.98781078426707	0.0468326205798529	0.121718994459911
SEMA3G|SEMA3G	641.109633801776	5.28927459983969	0.742426129376131	7.12431094563486	1.0460265691484e-12	2.51232655299711e-10
CETN3|CETN3	122.027530213431	1.13252594793609	0.510887977080569	2.21677940907481	0.0266381692583564	0.0799464261565839
PPM1F|PPM1F	840.60562152678	-0.193383353121718	0.442501997622626	-0.437022553933507	0.662094991484038	0.782226543150634
CPSF3L|CPSF3L	1121.72450182332	0.452928647753102	0.269351031575432	1.68155527418598	0.0926551096280043	0.201513024172563
BCOR|BCOR	1839.72989131361	-0.602347504814794	0.342649776698416	-1.7579101046517	0.0787628062455308	0.178809825443855
ESD|ESD	870.371689003199	-0.283804503254079	0.301595644237694	-0.941009953812222	0.346699758270688	0.507530004321614
WDR55|WDR55	583.447436144618	-0.139771479992795	0.23804664874248	-0.587160040820404	0.55709622657617	0.69937716464491
PHIP|PHIP	4874.04452529375	0.34706205120895	0.317962733944845	1.09151801188485	0.275045010668038	0.433276205933756
BAG3|BAG3	427.750496172977	-1.86380835625905	0.443560446609056	-4.20192641275285	2.64653170586437e-05	0.000392901273487892
RFT1|RFT1	421.287828751376	0.734217053494338	0.25884833956618	2.83647580944448	0.00456144337149206	0.020963508946886
IPO9-AS1|IPO9-AS1	5.1015264332222	0.0689391084458556	1.07053776801292	0.0643967083700533	0.948654350928958	0.97102905802075
RNU1-1|RNU1-1	5234.19946740831	-1.40487106368277	0.681308420274426	-2.06201922928957	0.0392059052688923	0.106738685881908
RCN3|RCN3	54.8100238379941	0.576045968220121	0.863824905507863	0.666855012569301	0.504864749203122	0.654476424974369
NFASC|NFASC	244.204479256975	8.62388329686576	1.81883269447539	4.74143846383473	2.12206114531021e-06	5.26064572536236e-05
CALHM1|CALHM1	3.6947233198798	-0.310097362465112	1.72531946489605	-0.179733300860774	0.857361948838758	0.914628879673008
SCAMP5|SCAMP5	50.6624505131378	0.656427110517649	0.82300972828091	0.797593379471691	0.425106494229831	0.581735072817047
MEIS3P1|MEIS3P1	12.5753691373442	-1.24888255107272	0.74582469974825	-1.67449878167655	0.0940326136443937	0.203364230298157
TNS2|TNS2	74.6941689182105	-0.939529297176421	0.516948925929421	-1.81745091255823	0.0691480980661115	0.16315080115639
TLE6|TLE6	3.48656179787704	2.50249787105481	2.88244806365098	0.868184895545033	0.385293121644095	0.54439070850076
EXOSC1|EXOSC1	503.625657350885	0.162931076064156	0.23576205670486	0.691082688798065	0.48951357847385	0.641417215135863
SNORD94|SNORD94	1003.32227136384	-2.16754924360036	0.606091152216224	-3.57627600349309	0.000348523681982853	0.00289330763077906
FBXL19|FBXL19	279.835824508102	1.24793345892171	0.500379933887508	2.49397182901875	0.0126322569669728	0.0455722965847599
ZNF285|ZNF285	6.40343662158326	-0.0914436427320894	1.17098108291723	-0.0780914773655256	0.937755286569318	0.964972726000545
SLC7A5P1|SLC7A5P1	75.243775406347	-0.903138229921746	0.627017686780271	-1.44037121912677	0.149762401847462	0.282813739358112
PEX10|PEX10	111.851661118998	-0.00565014908805992	0.420988631853526	-0.0134211440892916	0.989291797816725	0.994738377652156
MIIP|MIIP	426.48131141556	0.560229186577645	0.366777391284361	1.52743653204977	0.126652498083067	0.251854173629399
NOTCH4|NOTCH4	48.4273576329436	-1.33554702632835	0.486785913290326	-2.74360245410761	0.00607690817502211	0.0261726397035514
PGGT1B|PGGT1B	803.535452399604	0.0144275753774156	0.232819387406234	0.0619689603093138	0.950587550562018	0.972247740023282
CACNA1C-AS1|CACNA1C-AS1	5.02355780007853	-0.737365763869163	0.955551189809142	-0.771665371497723	0.440312645365813	0.595955041778508
MTG1|MTG1	205.053580365202	0.478003188856967	0.279928525676478	1.70759013466677	0.0877124201862863	0.193490420624831
LOC101927539|LOC101927539	21.8620909419532	0.190200435317269	0.711362616834261	0.267374797067223	0.789180602308707	0.871987868684054
SMAD3|SMAD3	2432.3132391435	0.246995752814016	0.358520872010203	0.68892991202751	0.490867374785867	0.642171144763513
PMS2P1|PMS2P1	291.534472951048	0.409586322381636	0.194782476792532	2.10278834691016	0.0354842751254925	0.0990993621814686
PPFIA3|PPFIA3	49.9846497790861	1.43164193123059	0.926270315709809	1.54559841436083	0.122201584399179	0.245060091418369
METTL21EP|METTL21EP	6.93647758146142	-0.00965836269442212	1.30313405514014	-0.00741164169282909	0.994086419664364	0.9972716825528
TAB1|TAB1	392.225982266052	0.666287770169463	0.276443913595695	2.41020958466071	0.0159433588020784	0.0541924082205746
C2CD4C|C2CD4C	3.84524229214934	2.88735147547845	2.39969607401431	1.20321548497113	0.228892944118125	0.380612669691111
DDX56|DDX56	914.145488031803	-0.189767293177682	0.247027313988332	-0.768203686118068	0.442366183920059	0.597811492421026
TNS3|TNS3	524.165598491589	0.587050228584763	0.681647375912489	0.861222751424674	0.389115371729579	0.548421206795395
RBM15B|RBM15B	2068.71870928461	-0.466603566139582	0.307431350574304	-1.51774880885743	0.129077734511857	0.255114408657017
PSMD2|PSMD2	2554.85658220239	0.5527058906929	0.260398774145504	2.12253645396987	0.0337927148286493	0.0954530423872206
ARHGEF11|ARHGEF11	584.229004532953	0.359066502461153	0.510027277576668	0.704014311091778	0.481423861325369	0.634599245215976
ALG10|ALG10	245.994194786267	0.814040750337735	0.308948802064991	2.63487265494071	0.00841688544837442	0.0334116303278416
PTGER4|PTGER4	4157.04361340894	-0.803978531628487	0.53102422965529	-1.51401477885554	0.130022091210741	0.256151377261526
CYP2F1|CYP2F1	4.06445055918542	0.00904093838533112	1.67270928728635	0.00540496693241794	0.995687481330398	0.997931545434664
GLYATL2|GLYATL2	9.66988926887736	1.57011003612901	2.70883897583604	0.579624721194223	0.562167718308633	0.703418807526036
FUCA1|FUCA1	358.232674834923	0.614709790223782	0.346911324233219	1.77195077613128	0.0764027286125159	0.175061296492844
ITFG3|ITFG3	420.123709331562	0.172478637583052	0.443052970561217	0.389295748010836	0.697057381321418	0.808319317688362
MFHAS1|MFHAS1	739.504900117118	-0.959101190537435	0.971368982148173	-0.987370616278473	0.323460983746165	0.484390282543689
RFX1|RFX1	213.926489449856	0.037782590506561	0.398065111976604	0.0949156039295946	0.924381862332276	0.956345500222564
GID4|GID4	203.915596626257	0.343014887127954	0.262227123061439	1.30808317279821	0.190845100242702	0.335345773090571
MSANTD4|MSANTD4	510.342944426828	0.631055181938784	0.322431285114651	1.95717726868344	0.0503266303764904	0.128495239608418
ADD1|ADD1	4362.9191941304	0.361238350311936	0.279268613040263	1.29351575309272	0.195832739252054	0.341577339564888
MSS51|MSS51	71.9693984194526	1.73579594924113	0.57210547037128	3.03404885835936	0.00241295348371198	0.0128434467000371
ZDHHC18|ZDHHC18	1115.29958005432	-0.481145136572983	0.313429227758872	-1.53509977360228	0.124759321910152	0.248915668475256
LDHA|LDHA	4873.22958171299	-0.578960320990666	0.261285913317838	-2.2158114597108	0.0267044172963888	0.080075696326532
PCDHGA10|PCDHGA10	96.034598956828	7.74056328710684	1.39628552184415	5.54368226699326	2.96176064805366e-08	1.52283136194501e-06
LINC01031|LINC01031	7.08021875451699	-1.23384885496068	1.93503467796685	-0.637636559700881	0.523710291128491	0.670430237613597
ZNF431|ZNF431	602.232208454082	-0.594161018831945	0.260849297855285	-2.27779420422889	0.0227388418092569	0.0712437658044499
AMACR|AMACR	91.390149035842	1.82329409687338	0.93234125622895	1.9556080830833	0.0505113399694748	0.128854259229565
HMG20A|HMG20A	588.386969154548	0.406330348731182	0.287877125472919	1.41147146743136	0.158105642984818	0.294337039546912
MMRN2|MMRN2	29.0366987904742	1.06441197258535	1.09624681273305	0.970960152606204	0.331568121839628	0.492663622370547
C19orf44|C19orf44	56.7823964580962	0.813880173151724	0.459472317255041	1.77133668903922	0.0765047298234564	0.175203425809125
SNORD22|SNORD22	243.400599959292	-1.68283169477371	0.492738583614146	-3.41526267829576	0.000637205293324753	0.00457311518946496
FAM72B|FAM72B	102.999966552081	2.23639610111156	0.587152713723575	3.80888318973934	0.000139595881498639	0.0014355041585429
UBE2I|UBE2I	1353.1093386038	-0.019104651738387	0.256827639930794	-0.0743870548494511	0.940702408998453	0.966557391993078
TNFRSF14|TNFRSF14	1655.93834969549	-0.275829493110092	0.285141942369631	-0.967341005037178	0.333373591417553	0.494336872321038
PTPN7|PTPN7	2738.58706780943	0.0229977665124432	0.33185397981038	0.0693008609557252	0.944750140443622	0.968950124830498
RASGEF1B|RASGEF1B	873.906797839475	-0.796073796273754	0.736372236223827	-1.08107524579699	0.279663643700057	0.437915751093427
BTN3A1|BTN3A1	2498.30457371539	0.916550416261061	0.374786599102208	2.44552611661312	0.0144640972481802	0.050457424801501
RPS20|RPS20	18415.6128487694	-1.26471491225764	0.292912697912885	-4.31771965254227	1.57649491449148e-05	0.00025978087721597
CLINT1|CLINT1	2441.70814860632	-0.246344560815688	0.185337162479441	-1.32916980879652	0.183791953260017	0.326608892086118
PSENEN|PSENEN	256.534452653578	0.298159012079187	0.343736530804895	0.867405659157079	0.385719782210122	0.544826645072823
ASCL5|ASCL5	3.63582419512702	-2.40440363022162	1.49730269748586	-1.60582334771646	0.108312729188218	0.225566704967811
EPHX2|EPHX2	623.738466971826	1.30179213206183	0.633979966235395	2.05336477711108	0.0400372127339825	0.108368582507195
LEMD3|LEMD3	1460.67910188923	-0.453454386969756	0.229370013714124	-1.97695583492845	0.0480466226218175	0.124321345104535
GLOD4|GLOD4	966.589562408731	0.296882671054969	0.259040804932931	1.1460845758715	0.251760158949108	0.406755516665565
EMD|EMD	525.143259039826	-1.40046186215439	0.443628997574958	-3.15683120312206	0.00159493643809247	0.00930013617575773
TTC12|TTC12	361.088002881785	1.15650960399066	0.293287839883935	3.94325794226019	8.03821188600642e-05	0.000927807564169523
KDELR3|KDELR3	128.070821287983	0.207218208405798	0.553915677011714	0.374097027770918	0.708332129920372	0.815388827647159
ZSWIM4|ZSWIM4	107.460468521229	-0.276088480650866	0.349695972642702	-0.789510038003659	0.429813965210876	0.586043102266296
CDH3|CDH3	7.07997939365707	-1.66616707569295	1.67770710479993	-0.993121547215271	0.320650724568459	0.481415409647097
CRTC1|CRTC1	246.392614511656	0.617878730161563	0.402263799248975	1.53600381469857	0.124537444758629	0.2486347066901
GPR19|GPR19	63.2586526915599	1.87183112004031	0.667696605421282	2.80341566040953	0.00505644552666118	0.0228071537500046
TRAIP|TRAIP	76.1730707102887	1.28963524344202	0.510315900278436	2.52713121958061	0.0114998527004746	0.0424031372024019
MAGI1-AS1|MAGI1-AS1	32.3792634246888	6.2287160625011	1.76570116577729	3.52761621458131	0.00041931964473102	0.00335092585736963
LINC00494|LINC00494	13.2532606156961	0.981451187392086	1.3227266546047	0.741990935145552	0.458092827824483	0.612770541379654
MCCC1|MCCC1	474.420225477381	0.680332563191834	0.256847331030966	2.6487819065942	0.00807824441778016	0.0323740342392315
CELSR2|CELSR2	124.727708701335	0.190444361821192	0.650167385525576	0.292915895292475	0.769586438793453	0.859903624346743
C9orf91|C9orf91	356.661484681987	-0.112521864131855	0.394692151173301	-0.285087665912183	0.775576979308486	0.862884141012481
GRPEL1|GRPEL1	633.950516753894	-1.27063374681494	0.307612595503129	-4.13062977716077	3.61770796117513e-05	0.000504608382524133
CES2|CES2	496.484064473145	-0.360221879954146	0.253363460950216	-1.42175939104703	0.155096112164259	0.290433309791726
TMPRSS11D|TMPRSS11D	7.01009425319364	3.91890391626788	1.81042569358551	2.16463118599835	0.0304159407641258	0.0884969614034877
TBCE|TBCE	240.685096810242	0.975999933840526	0.268041268313973	3.6412300985581	0.000271338488325736	0.00238105211343666
FLJ32255|FLJ32255	568.325232513471	-0.285717261941673	0.229106915884155	-1.24709138892229	0.212363989998928	0.360734745800376
LRRCC1|LRRCC1	133.760150165736	1.91720163015329	0.702817013861765	2.72788164250443	0.00637424745227418	0.0271327216753395
ZNF385A|ZNF385A	277.158673492269	-2.04137559557543	0.682519194422147	-2.99094239731054	0.00278117950307384	0.0142872605412814
SPRYD7|SPRYD7	48.8809895497704	-1.36551105705289	0.466258465082738	-2.92865687019875	0.00340430001647196	0.0167005014518195
MAGI2|MAGI2	9.93964573896896	-0.363675359630779	1.00408762376649	-0.362194843380875	0.717206432727103	0.821834124756838
TPTE2|TPTE2	11.8572576236691	4.85743459974424	1.73701619319416	2.79642447708678	0.00516714858752041	0.0231880256424355
PABPC1P2|PABPC1P2	4.05952888362204	1.57526371139449	2.35848865630921	0.667912354456524	0.50418954071456	0.653987957190825
CELF1|CELF1	3198.09403382298	0.524115257390557	0.263076870789993	1.99225137434808	0.0463434839882286	0.120805873441215
APOBEC3A|APOBEC3A	494.96289646203	0.340707485748938	0.908223733216748	0.375136074172187	0.707559269488678	0.81494022335992
TNIP1|TNIP1	3551.85158776045	-0.427722416716301	0.306151822774807	-1.39709250410348	0.162385755644108	0.299853549626976
NUDT7|NUDT7	56.2580521243979	0.552012224039378	0.671779378170699	0.821716536673908	0.411238245287639	0.568989911192248
AMPD2|AMPD2	1117.61033981999	-1.14256567005492	0.371587176621282	-3.0748253490443	0.00210625854155995	0.0115367169663139
MEP1B|MEP1B	3.3274701545843	2.3809424088357	2.00325818838729	1.18853496900091	0.234622711313483	0.387275465774741
ZFP62|ZFP62	563.642193949915	1.32481683484599	0.32144367896646	4.12145866145412	3.76481033537989e-05	0.000518573077383853
ZNF221|ZNF221	20.8812427467395	2.07326607855473	0.903207598922387	2.29544800224038	0.021707463091914	0.0687867251745036
SET|SET	8215.83067792883	-0.1974671047621	0.198118607257783	-0.996711553222077	0.318904540199902	0.479862109794445
SLC25A21|SLC25A21	47.2042943021609	6.18647444821605	1.72051144399394	3.59571827889443	0.000323497744330578	0.00274136585372065
TXK|TXK	1240.60538510203	0.980135846106055	0.760948451835974	1.28804499666336	0.197730300264175	0.344194519384436
ZNF763|ZNF763	58.5039668186333	0.75500667251825	0.544328908008225	1.38704129325213	0.165429171678073	0.303745907114007
CETP|CETP	33.2006956692682	2.12084434139655	0.99079320391749	2.14055196685944	0.0323101858202036	0.0922629459259984
EHMT1-IT1|EHMT1-IT1	33.0336424706084	1.03297711921326	0.679898815744263	1.51931007275324	0.128684465490448	0.254739159246249
E2F8|E2F8	83.9968341494248	3.04003687464261	1.01591712268892	2.99240637523293	0.00276787551088654	0.014243956951093
NME9|NME9	59.8141898330989	1.10121473295739	0.545966119599266	2.01700195932611	0.0436953088444815	0.115726563439622
PAQR4|PAQR4	148.419594872892	1.94630055358179	0.565240777091526	3.44331235902083	0.000574635199103801	0.00423865932202984
FUBP1|FUBP1	2891.75412823486	-0.156654459820019	0.224827728256948	-0.696775531356985	0.485943281291353	0.638396789366198
LOC102723704|LOC102723704	22.6857381521546	-0.0192997056336437	0.794845204779757	-0.0242810870815928	0.98062839900643	0.989773629599892
LGALS2|LGALS2	168.90072922758	-0.504761802090029	0.669909031585	-0.753478126568567	0.451162650614643	0.606799229305503
HIST1H2BF|HIST1H2BF	994.506962590526	0.480863742844217	0.522626053603652	0.920091410538238	0.357524992594507	0.517986121068232
CNIH2|CNIH2	21.8245685800896	-1.30092185503599	0.686673131192856	-1.89452855505806	0.058154887834897	0.14318630085792
JUND|JUND	4284.58830890248	-1.55173466446629	0.649288758211842	-2.38989917019326	0.0168529988939398	0.0566126149205639
LGALS9B|LGALS9B	3.46357918010628	1.42313873993987	2.59324006858785	0.548787887854455	0.583151023380626	0.720537230738002
GALNT8|GALNT8	11.5606956416584	2.32918852875455	1.42240774911817	1.63749707508171	0.101526649594292	0.214931990743386
C12orf66|C12orf66	238.510209563743	0.257518301803183	0.312286130655854	0.824622922773902	0.409585703216869	0.567419890526341
XYLB|XYLB	67.5353432100917	7.05648820662577	1.39755361826427	5.0491717200731	4.43729741881148e-07	1.46790821969852e-05
CBLL1|CBLL1	1653.20499988898	0.0361875930864052	0.33500421708646	0.108021306123038	0.91397879125784	0.950393124628858
EVC2|EVC2	569.380492284658	6.43720802940287	0.670822498791169	9.59599303989178	8.3112852676991e-22	1.45721764598568e-18
FSIP2|FSIP2	47.699837620055	1.09294783421794	1.0766545697247	1.01513323302701	0.310042321897513	0.470361861194868
TMEM50B|TMEM50B	776.855090464206	0.376950571941274	0.21259612624101	1.77308297477605	0.076214958680136	0.174768097114678
TIMM44|TIMM44	391.887625580314	-0.0144195767470843	0.323378509973036	-0.0445903988743302	0.964433795637619	0.980446005814076
DNAJB7|DNAJB7	24.468726726229	0.318487412869518	0.644268633503666	0.494339466966624	0.621066456645171	0.751442839304381
GMIP|GMIP	1502.89504748239	-0.1321815899251	0.268333635043148	-0.492601644605028	0.622294085772521	0.752408951510214
PTK7|PTK7	112.821028896998	0.714504123216233	1.31187422639188	0.544643769076379	0.585998545585488	0.722946001723726
ZSCAN5A|ZSCAN5A	19.655250927103	2.66814553171033	0.853516110654414	3.12606346664575	0.00177163312779994	0.010080089472633
VPS8|VPS8	1516.83704878637	1.22786213006423	0.30930423482995	3.96975531466385	7.1946477130405e-05	0.000853476037569277
UBXN4|UBXN4	2863.14911554543	0.476985613762671	0.245687621015247	1.94143120354065	0.0522059965347335	0.132307965298772
SNORD104|SNORD104	24.7342163456715	-0.899440897156148	0.486437340688134	-1.84903752636211	0.0644523942283807	0.154864167192846
ACYP1|ACYP1	104.488311380287	2.7277046187836	0.536066698173917	5.08836797375286	3.61158079916743e-07	1.23294949411246e-05
PER3|PER3	246.549501678597	0.783274831644688	0.868818484892468	0.901540247203226	0.367301144756248	0.528162959977962
SKAP2|SKAP2	851.758451255598	0.862514081617083	0.753957895739105	1.14398176143717	0.252631200917006	0.407884091751494
SSPO|SSPO	27.4135008686654	-1.24338645357709	1.24511203231532	-0.998614117691068	0.317981658501403	0.479106552999466
MT2A|MT2A	426.586146060043	-0.537025178152698	0.503392474914272	-1.06681208979962	0.286056698125966	0.444827679666746
LINC00341|LINC00341	769.02134942707	1.83703105795538	0.452118791774287	4.06316015033609	4.84127891451144e-05	0.000629222707250772
CXCR5|CXCR5	153.033110938522	-2.80496172258262	0.744763619829446	-3.76624427925866	0.000165721654751064	0.00163511410959505
OGFRP1|OGFRP1	10.1758476056449	3.59524451846535	1.17125029257884	3.06957833116046	0.00214361184772844	0.0117047482174472
POM121L9P|POM121L9P	11.5128452539011	0.687052929953116	0.70697132461885	0.971825738934358	0.33113724873266	0.492390945833348
GGT3P|GGT3P	4.07432668530798	2.51471626550985	1.58417226587643	1.58740076422093	0.11242190633696	0.231775228376659
MIR378J|MIR378J	5.25491054966963	-1.0116622752325	0.763521147031092	-1.32499575049923	0.18517256076488	0.328205739014876
RFK|RFK	369.172744680024	0.110234937513102	0.250642985275664	0.439808588266945	0.660075746889336	0.780753428469995
KLHDC1|KLHDC1	88.1848489944595	-0.455188568144881	0.412884585234319	-1.10245958416334	0.270261919834817	0.427933011872468
C5orf28|C5orf28	264.6225589127	0.826981300559836	0.26981930850693	3.06494485193078	0.00217710137099685	0.0118396769037493
KAT5|KAT5	678.211826507525	-0.386530552887017	0.25598695234394	-1.50996193105843	0.131053138352815	0.257480353511868
ZC2HC1A|ZC2HC1A	337.935532335603	2.702871676273	0.643796366075154	4.19833322879842	2.68886765191582e-05	0.000398511551488081
MRPS22|MRPS22	553.006855234643	-0.224379378294192	0.278589717394923	-0.805411557872097	0.420582224315309	0.577316851085909
KYNU|KYNU	326.847928564069	-0.940403759784739	0.73357496531138	-1.28194636438495	0.199861461977702	0.346261957792
HIST1H2BI|HIST1H2BI	1276.11625681837	-0.0336774964808134	0.599865130343757	-0.0561417805057518	0.955228860375187	0.974483911498453
TBC1D8|TBC1D8	378.952762159555	-0.213310121082283	0.584738212579128	-0.364795931740851	0.715263742142029	0.820681981989223
OXNAD1|OXNAD1	1533.22462911951	-1.79011041768794	0.418646748934415	-4.27594486818379	1.90328323944183e-05	0.000303340479205927
NLGN4X|NLGN4X	4.12032366671085	1.32804851348243	1.95947734027017	0.677756504854156	0.497926093147122	0.648405985676507
VAV3|VAV3	651.796836483513	-0.901677314060951	0.618484506987424	-1.45788181251771	0.144873122572801	0.276363884024472
GIMAP8|GIMAP8	1159.62939494192	1.95691807125758	0.700075228625461	2.7952968355984	0.00518520812894275	0.0232512158886837
CELF4|CELF4	3.51688076449053	2.68220459184057	1.64603394785375	1.62949530617997	0.103208207730605	0.217939239568914
CSNK1A1P1|CSNK1A1P1	3.2713407707083	2.69480291485137	1.9019050121721	1.41689668916416	0.156513134652033	0.292396887571027
PPRC1|PPRC1	678.069673570022	-0.0797162178144894	0.275248501453624	-0.289615447108694	0.77211044816815	0.861224717428495
WDR62|WDR62	136.49331349781	1.50565631067659	0.473385050483071	3.18061651744204	0.00146962026615203	0.00874045187464163
VWA2|VWA2	4.69576604954749	1.81373445663199	1.7963957848755	1.00965192186626	0.312662084354503	0.473505743710667
IL1B|IL1B	1214.38695590425	-0.810467524292799	1.06907935613115	-0.758098563633078	0.448391979534725	0.604045837662876
SSTR2|SSTR2	6.95462535286088	1.20797532069876	1.61752393755326	0.746805220407434	0.45518114395831	0.610220589219438
HMG20B|HMG20B	482.98469529788	0.568950436488599	0.308810972393964	1.84239061221815	0.0654180339951411	0.156575561725869
GZMA|GZMA	447.827684548687	0.907744671583651	0.791055577658537	1.14751061394511	0.251170648990928	0.406177364762769
LSM14A|LSM14A	3182.94458962175	-0.654289095460697	0.240207540941141	-2.72384910522447	0.00645259800637387	0.0273599518369415
RND1|RND1	27.5075149917229	-0.317745192264143	1.09346412179845	-0.290585841757241	0.771368089681311	0.861005991030771
TXNDC16|TXNDC16	490.944726031017	0.301843419338041	0.327858290508587	0.92065208682022	0.357232098740907	0.517865556277376
LEF1|LEF1	9537.89373018732	1.74613442647317	0.366057640807057	4.77010785138488	1.84127308401836e-06	4.69693234294329e-05
TMOD3|TMOD3	2258.33242634649	0.653257804245303	0.224014321164856	2.91614304321445	0.00354387982804396	0.0172405230369297
BMPER|BMPER	5.12813495679282	3.44936452015439	1.80782728493617	1.90801662796907	0.0563890671816729	0.139647221182261
C1orf52|C1orf52	459.551727640653	-0.616183056573994	0.248059462236575	-2.4840135144143	0.0129910877687518	0.046531714371711
DST|DST	2006.07493541837	2.56184970988148	0.716303187101363	3.57648793976252	0.000348241374862241	0.00289330763077906
NT5M|NT5M	49.9194650805742	-0.0164723703580365	0.775124118757033	-0.0212512679704137	0.9830452175748	0.991185910618148
ZC3H4|ZC3H4	857.190126451187	0.647130686391135	0.251925529783297	2.5687380193178	0.0102069589644127	0.038761390638088
FAM20B|FAM20B	2152.081078994	1.28098113294328	0.338854309826614	3.78033005865777	0.000156620593160835	0.0015664739645687
CD52|CD52	9743.94912363661	1.3970748813336	0.46416206608518	3.00988595021726	0.00261345804289288	0.0136333709806727
LOC392232|LOC392232	13.3284597789997	4.90307533648904	1.55675899824794	3.14954038615304	0.00163527504554253	0.00949380045480038
MURC|MURC	17.9217594524711	5.54508953846296	1.56943162888942	3.53318324697383	0.000410587773183809	0.00329767999415104
KCNK7|KCNK7	35.8212936722137	-0.183657531443644	0.650981290101473	-0.282124132039211	0.77784832981214	0.864752695871932
SNCA|SNCA	66.8368543920155	1.08633039414186	0.994569731592123	1.09226166817166	0.274718103615202	0.432955731297558
C12orf40|C12orf40	10.784302459555	2.1199664674858	1.74252675689214	1.2166048292233	0.22375460445876	0.374519282097894
DEXI|DEXI	217.726374951749	0.450045945425907	0.297088650967741	1.51485404763837	0.129809369687984	0.255983317820202
GREB1L|GREB1L	31.7289085624527	-0.448851197878146	0.518650104468327	-0.865421975260696	0.386807223857437	0.545914115422398
MIR3687-1|MIR3687-1	43.3192186887715	-0.703945418850961	0.879768549844255	-0.800148424236784	0.423624807777131	0.580357380431039
SYS1-DBNDD2|SYS1-DBNDD2	34.8486281609794	-0.966463762147637	2.07759551519139	-0.465183793034231	0.641799843867668	0.766523701607299
LRRC37A|LRRC37A	735.07291400262	-0.757140808524355	0.426360985837262	-1.77582103821607	0.0757624189626877	0.174026266431653
ATP6V0C|ATP6V0C	689.870971727123	-1.37915533373751	0.493867406426224	-2.79256196256704	0.00522924513446544	0.0234187368946571
MOCS1|MOCS1	12.5564261832291	3.31422411295907	1.98348714928451	1.67090778186014	0.0947398942066644	0.204414787733872
SLC27A2|SLC27A2	58.6553436701391	2.09016466080349	0.8774618846458	2.38205749717233	0.0172162091385771	0.057473685229755
MAGEA9B|MAGEA9B	130.015607982966	22.65242108383	2.54329654555704	8.90671641236735	5.25662959067976e-19	4.60822433066941e-16
SLC47A1|SLC47A1	14.3488924713112	-0.211435486233329	1.36706624547684	-0.154663672614914	0.87708647036439	0.926885485196725
ATXN2L|ATXN2L	2076.01729924177	-0.265413414544366	0.305240226072154	-0.869523057166218	0.384561102227173	0.543783254986078
PXMP2|PXMP2	77.7799123580836	0.963272977873458	0.416242436772182	2.3142113652402	0.0206561308525391	0.0660401061702347
TLN1|TLN1	14142.4785071934	0.503105711976297	0.335886360646251	1.49784501820292	0.134173521408831	0.261733906415335
SNORA23|SNORA23	1319.1425819077	-0.977584131870085	0.573581079034294	-1.70435212667054	0.0883153219894459	0.194453414597633
TNFRSF10D|TNFRSF10D	158.31514988677	-1.65532828121261	0.600372953623923	-2.75716664320211	0.00583046293152546	0.025423134686654
SDHAF3|SDHAF3	162.706520184434	1.93317585395369	0.397232946636528	4.8666050243878	1.13531603798017e-06	3.18998334838242e-05
SNORD103A|SNORD103A	9.70432322100012	0.106533270399565	0.592900646788043	0.179681487913184	0.857402627405781	0.914628879673008
PTTG1IP|PTTG1IP	1882.15973090004	-0.612147799761567	0.258004447531586	-2.37262499006582	0.0176621861483087	0.058627623956512
ZNF341|ZNF341	105.575675005977	0.768788133443358	0.334324176427417	2.29952898309245	0.0214749195294833	0.0681853973398101
SPTB|SPTB	107.706424116248	1.07085294053453	0.748432682292776	1.43079393226661	0.15248928261295	0.286651076664829
SNORD72|SNORD72	7.91110549471611	-1.14154364635681	0.59766659321962	-1.9100007584619	0.0561331156636046	0.139332314510134
ZNF592|ZNF592	2002.45600159957	-0.308575460406044	0.292369155124741	-1.05543096799794	0.291228265853963	0.450711023498767
IFITM10|IFITM10	70.7328339981785	-2.52436029782835	0.888979245650013	-2.83961668416968	0.0045167772675639	0.0207909309089519
RACGAP1|RACGAP1	679.419402829933	2.4658077722674	0.39342445315914	6.2675508664175	3.66770833733474e-10	3.89375851430903e-08
LINC01588|LINC01588	134.753432980645	-1.39353770140919	0.494146635149004	-2.82008942748135	0.00480102676823569	0.0218640006045393
FAM161B|FAM161B	91.9340013799047	-0.288627232139282	0.397269365020641	-0.72652778581174	0.467515280112638	0.622024497660965
MBOAT2|MBOAT2	125.501903410501	0.177351662000503	0.887774247211924	0.199771127127736	0.841659583346172	0.903995189586402
FTO|FTO	862.744839369036	0.351592298260912	0.206860906529941	1.69965560027179	0.0891957254368424	0.195826277746576
P2RY6|P2RY6	9.96237215022438	-2.30363512150961	1.76923993084754	-1.30204789149546	0.192900014572345	0.337931541507245
PTPRC|PTPRC	39005.335669484	0.495404259337347	0.378362715042583	1.30933688664749	0.190420259987621	0.334902038154575
PRKY|PRKY	1088.63426629567	0.273442741822871	1.2964587436609	0.210915112540128	0.832953511286829	0.89899500851905
SYNE2|SYNE2	22146.8910994425	0.436015328385994	0.43410845253166	1.00439262549073	0.315189403166375	0.476151628960542
CMAS|CMAS	368.849662487845	1.11495707078297	0.282252049777928	3.95021779880857	7.80801096746438e-05	0.000907810718120378
DOC2B|DOC2B	34.0516557106959	6.30104084345637	1.48404103485792	4.24586699117764	2.17749781297129e-05	0.000334601833083484
ALS2|ALS2	2105.91409986216	3.80672483556297	0.922992975488555	4.12432698477256	3.71820362032784e-05	0.000514289346738525
NLRP7|NLRP7	6.28150111325142	3.56206702157354	1.61624004024013	2.20392202450592	0.0275298283414209	0.0819909088347431
KPNA3|KPNA3	1305.80736773687	0.00223948133636042	0.284935369687242	0.00785961159830236	0.993729001815453	0.997198408243494
SC5D|SC5D	670.004563299381	-2.07158853815132	0.456916273890705	-4.53384713245482	5.79189540396353e-06	0.000115367716929002
NEDD8|NEDD8	1038.26736661432	0.769370138776043	0.256128754575587	3.00384132992373	0.00266594319759266	0.0138659098437829
LOC100129973|LOC100129973	54.2872998657641	-1.45631893775335	0.400446493417614	-3.6367378955535	0.000276112634674479	0.00240969777190027
TMEM134|TMEM134	137.424913085743	-0.0112814511089513	0.380367233931918	-0.0296593662717292	0.976338718670909	0.987091843758335
ADGRA3|ADGRA3	2069.88182238002	5.91283558397222	0.853857809173602	6.92484804899178	4.36443731236916e-12	7.97100827060088e-10
MAP3K11|MAP3K11	928.7282732333	-0.305395278234397	0.305788563046939	-0.998713866834575	0.317933321263632	0.479106552999466
EFTUD2|EFTUD2	1669.95539513336	0.379379875118835	0.15747927648534	2.40907809323186	0.0159928754571206	0.0542995905092362
GYPC|GYPC	1449.26309738544	-1.40049370114859	0.397190749079201	-3.5259977841763	0.00042189049879173	0.0033653349023273
ACCS|ACCS	45.3592552168824	-1.49384886231519	0.937656105783402	-1.59317350263197	0.111121273752409	0.229940905547149
TMEM191A|TMEM191A	35.9057741503283	-0.0567136592323977	0.528448297969496	-0.107321112491636	0.914534235925301	0.950532263825852
KDM4A-AS1|KDM4A-AS1	23.6153826100549	1.03702036415693	0.683034075297323	1.51825567956549	0.128949955894837	0.255034357214233
PEAK1|PEAK1	407.78830469448	0.211986798381134	0.506877616209242	0.418220871472897	0.675785637202363	0.792459019791868
SPG11|SPG11	3676.93519002253	1.01369551607943	0.306483855844177	3.30750053143031	0.000941325332570552	0.00618600339428766
GCNT1|GCNT1	219.174760906312	0.920860793706064	0.500798519276288	1.8387849769141	0.0659468187660659	0.157312322915025
CECR6|CECR6	34.2114334677204	0.107951585137076	0.679271776609524	0.158922523876818	0.873729914729759	0.925108165636286
ABCE1|ABCE1	2364.47315426985	-0.0146802533371351	0.222249784877375	-0.0660529473413656	0.947335671574986	0.970302391034246
LOC644936|LOC644936	3.52875097619727	-1.55042946198517	1.98409514382488	-0.781428988831804	0.434550226841317	0.590313452109835
EWSR1|EWSR1	3479.61403171407	-0.283675095012556	0.209753725926125	-1.35241981404643	0.176241054412578	0.317219423777408
PROK2|PROK2	87.2340736163591	0.642991992693067	0.756490814741994	0.849966688508126	0.395343606690132	0.554037203748548
ITIH2|ITIH2	30.162123812602	0.00436516333696721	0.995726400681186	0.00438389836202089	0.996502166384708	0.998267197075939
TELO2|TELO2	407.169335196972	0.815370390680008	0.498698987305745	1.63499508006844	0.102050078999462	0.215883691493432
DSG3|DSG3	5.92635460287885	1.29939264039566	2.58534609131806	0.502599108397592	0.615246156265726	0.746771260492003
DDX54|DDX54	1024.35279976925	-0.434187817146461	0.253983996325001	-1.70950856522026	0.0873567865064865	0.193118968329117
HSPA1L|HSPA1L	140.330058376658	0.076979264163648	0.404236818707192	0.190431105236378	0.848971325164238	0.90884503224523
CRTAM|CRTAM	55.8903513442214	-1.10555081318024	0.813963056658098	-1.35823217544949	0.174390023978543	0.314662991706885
LOC100507002|LOC100507002	7.87858492479748	3.51887833161307	1.55234842374452	2.26680961425204	0.0234018585591336	0.0728136266401579
VIPAS39|VIPAS39	366.046451118167	0.378174357507338	0.248987547840263	1.51884847570752	0.128800640766756	0.254882802998141
SEC24D|SEC24D	738.34641496158	0.115814993931893	0.263836873893469	0.438964395775309	0.660687334928945	0.781107959764612
C1orf53|C1orf53	4.02926182132632	2.89935520767416	2.3116360468803	1.25424381212043	0.20975339977677	0.3577438091718
DDN|DDN	10.3446454752238	1.98405719876533	1.3993250898343	1.41786723698371	0.156229529333867	0.291960385611884
MPP6|MPP6	437.397578421958	-1.54853564254695	0.44790493348238	-3.45728641680138	0.000545644579667282	0.00407617657235043
TRAF3IP3|TRAF3IP3	4215.98863921452	2.56809737544813	0.441177984679405	5.82100074035724	5.84963104900458e-09	4.02202279145872e-07
AMMECR1L|AMMECR1L	571.053132755002	-0.218803041971288	0.228804934612706	-0.95628637704712	0.33892757059996	0.499871271021351
ZNF701|ZNF701	172.975344562156	0.133720921159866	0.658658158776565	0.203020215233116	0.8391192317601	0.902759863192601
OGG1|OGG1	192.079347482257	1.07700538220351	0.424711528314819	2.53585153781175	0.0112174278513749	0.0416067616920152
CCNI2|CCNI2	165.996690387849	1.95897595312416	0.654272689087737	2.9941276562462	0.00275230762829167	0.0141971784780341
TRO|TRO	19.0855697523454	-0.149600768151413	0.890759054958104	-0.167947513212144	0.866624570821055	0.920824713666176
HAX1|HAX1	969.564189360071	0.595185447942495	0.278498265490892	2.13712443376765	0.0325878721147796	0.0929045791525903
EMC9|EMC9	82.09474393832	0.358695159435189	0.32379206214383	1.10779478984217	0.267950450733821	0.425579785552684
GAS5|GAS5	3864.21696037262	-0.789610262277255	0.361773253083797	-2.18261094634975	0.0290644729843869	0.0854152539113736
STX18-IT1|STX18-IT1	3.47085192918165	2.27380601584106	1.24278414194757	1.82960655764224	0.0673087924515997	0.159875904765763
SORBS2|SORBS2	4.10065949517977	-0.300386159382138	2.18070922829949	-0.137747002435707	0.890440370870586	0.935864466039683
MAPK11|MAPK11	252.310231775023	1.92268878097112	0.472979460585005	4.06505766358869	4.80205878782492e-05	0.000626727449187637
MYSM1|MYSM1	1757.16067317479	0.0858888540408144	0.292706591229766	0.293429859846901	0.769193604541544	0.859710789107554
KIAA0319|KIAA0319	11.1997556908239	4.7659779729562	1.60476305400029	2.969895126309	0.00297901430128285	0.0150261961289966
ENTPD5|ENTPD5	80.0875948724246	1.49152510216209	0.496802504895741	3.00224956086946	0.00267992378578515	0.0139056240710776
ZNF558|ZNF558	447.421598177573	1.00138338139382	0.227008677903513	4.41121190009946	1.02793659420082e-05	0.000185836285948515
CMBL|CMBL	4.84486258996192	-0.791719527271522	1.81512905139738	-0.436178092495416	0.662707521394713	0.782599243794269
BCAM|BCAM	10.0324546350308	0.66297110200823	3.77687781917286	0.175534167042084	0.860659926116804	0.916827398184872
FLJ23867|FLJ23867	62.2391954149379	-1.59479199546558	0.590503007751433	-2.700734754152	0.0069186491370591	0.0288477230249839
FAM86C1|FAM86C1	71.8392091101636	0.943238007818889	0.377701047468824	2.49731371977925	0.0125138193156037	0.0453128447047664
LINC01272|LINC01272	111.392681296278	-0.182226755725116	0.780827546526357	-0.233376443410305	0.815469103626399	0.8878303399082
PDE7A|PDE7A	2247.21236120255	0.412580098908046	0.395520793110881	1.04313124896162	0.296887509665873	0.45651932531154
C17orf67|C17orf67	63.3326811180623	0.157823546966094	0.402417565198892	0.392188514157155	0.694918930110436	0.807209063311665
WDTC1|WDTC1	971.481958133941	0.591785186339359	0.335195476158198	1.76549275999197	0.0774809859601955	0.176884651932306
NHLRC1|NHLRC1	6.80741601188065	-1.79954075802704	0.904441495367702	-1.98967071639657	0.0466272205456918	0.121329037967886
GNAO1|GNAO1	153.868890926079	1.57560409411976	0.766581983661116	2.05536280228611	0.0398439755335501	0.107906151224858
TRPC5|TRPC5	32.1502434737051	0.117090323133933	0.783987646834129	0.149352255238667	0.881275683891627	0.92985536292182
BIN3-IT1|BIN3-IT1	45.4829333991105	0.3208132471915	0.66035310374415	0.485820760699865	0.627094253461799	0.756204790642058
TNFSF13|TNFSF13	445.900742220345	-1.02351819213265	0.81953906940896	-1.24889493416195	0.211703504716209	0.360123949567215
TNFRSF11A|TNFRSF11A	443.779041292285	2.08001842462188	1.41640509728386	1.46851944306793	0.141963178812169	0.272323896511353
SNORA71D|SNORA71D	245.523695998819	-0.562569320232741	0.541346781991261	-1.03920322231051	0.298710232180411	0.45852622139898
XAB2|XAB2	1352.79583171362	-1.14428773225561	0.368179169862831	-3.10796434432161	0.00188380794105611	0.0105861553303003
DAGLA|DAGLA	41.5989389712769	-0.281567996398818	0.680566475447099	-0.413725927674945	0.679074836567836	0.794701582535301
TTC19|TTC19	981.631096448568	-0.2431134307848	0.324906943146852	-0.748255572596111	0.454306016575162	0.609437443658173
SNORD3A|SNORD3A	431341.278120299	-0.42899063216845	0.431891999676379	-0.993282192052404	0.320572453376376	0.48133911321812
LOC339666|LOC339666	24.8718331939986	-1.41510782050218	0.583635162725875	-2.42464455687163	0.0153233813885706	0.0526690542806918
ZNF624|ZNF624	277.614068113499	0.238155816037461	0.320987149700486	0.741948131754447	0.458118762128814	0.612770541379654
NSFL1C|NSFL1C	582.431257106098	-0.292912974738812	0.203655516620786	-1.43827665264883	0.150355573621277	0.283598648511228
CWC25|CWC25	643.006841117432	-0.209325199527723	0.361991348878875	-0.578260226870131	0.563088442552648	0.704181859006818
CDADC1|CDADC1	150.092192440878	-0.330767225768547	0.395586748024822	-0.836143342566653	0.403074267631622	0.561860302162082
ELP5|ELP5	282.140903270691	-0.362428138488781	0.282450547865611	-1.28315608246305	0.199437398784597	0.346005928447491
CACHD1|CACHD1	18.440421714478	-3.34549796338506	0.711609406620666	-4.70131216965267	2.58494977145232e-06	6.07532497893748e-05
ZNF692|ZNF692	234.323663118496	1.34564820582293	0.445218479952502	3.02244463429839	0.0025074194631442	0.013201524948567
PANX1|PANX1	482.200896615051	0.738841361135203	0.238083594323913	3.10328547934306	0.00191384927765568	0.010717588948426
LOC101927045|LOC101927045	39.1461373702667	2.27953354581151	0.641823420402679	3.55165217308732	0.000382820555940501	0.00311605979912015
MYO1F|MYO1F	4222.93771335519	0.175797755984	0.500534016543866	0.351220396962958	0.725423009093613	0.827846138319643
FMOD|FMOD	25.8176747676931	0.210134990184954	1.5431840538521	0.136169752182453	0.891687086668313	0.936424138121054
ZRANB1|ZRANB1	1918.47072665729	-0.97199041348088	0.258181473861023	-3.76475662232874	0.000166711378586508	0.00164118506499565
PARG|PARG	932.866371622452	0.438134981070833	0.223649758576996	1.95902282148002	0.050110114194848	0.128241224956688
GHRLOS|GHRLOS	106.99142915875	0.832245570379852	0.477628636932023	1.74245324929774	0.0814291651911351	0.183249589692744
ZNF473|ZNF473	166.471393596921	0.498799730082635	0.412309097735661	1.20977134102053	0.226366646120652	0.377593607309808
FAM133DP|FAM133DP	376.73154711026	-0.29938892832091	0.451415550467907	-0.663222452152088	0.507188093910518	0.656653086299353
DSN1|DSN1	303.200133838755	0.724430316181968	0.337020000419222	2.14951728467404	0.0315934174237797	0.0909270170208684
MANF|MANF	342.336574493812	-0.00648725600404479	0.381787320756773	-0.016991805781255	0.986443152868906	0.993298173630285
AHI1|AHI1	672.883326162521	1.3030768657377	0.56088747412073	2.32324115952216	0.0201662007953617	0.0647808718477604
SCARNA5|SCARNA5	26649.0493159063	-1.43234135705219	0.59298709306366	-2.41546801575733	0.0157150026101078	0.0536632148047181
CCR6|CCR6	272.054324309953	-5.47304663686303	0.65202649299533	-8.3939022350465	4.70267230298327e-17	2.74839844960686e-14
CAV2|CAV2	20.5097854394784	4.17026344358391	1.68228261694339	2.47893154312029	0.0131776594951964	0.047027051481636
MED7|MED7	252.286367807186	0.175231822727588	0.273999541657912	0.639533269535044	0.522476077621373	0.669387874967887
KLF10|KLF10	2051.10327322268	-1.83899157993082	0.707028402165696	-2.60101514210435	0.00929483512555076	0.0360944284067069
AP1AR|AP1AR	376.937509359212	1.01330882924432	0.374397050285477	2.70650858085468	0.00679948251519687	0.0284727315354542
RQCD1|RQCD1	1536.48824577388	-0.266276053862481	0.244614882387905	-1.08855214066749	0.276351431626823	0.434592308791199
MIR5189|MIR5189	5.48476756833982	0.350508800429992	1.48177040921911	0.236547307362353	0.813008002650643	0.88622234099657
CHD7|CHD7	1822.52443701462	-0.47596718658664	0.52219490661397	-0.91147420351707	0.362045571644486	0.522780393006832
CFAP44|CFAP44	395.410736625217	1.43822735529901	0.431180864366723	3.3355546921391	0.000851294067027443	0.00572965024076474
GAL3ST4|GAL3ST4	51.7806806965168	-0.257601065515303	0.755776173626767	-0.340843062409793	0.733221730333008	0.833706414535099
REXO2|REXO2	431.743919687819	1.59929720990142	0.399171698494083	4.0065395816761	6.16148037976218e-05	0.000758855255664243
LOC100289580|LOC100289580	37.4231622625782	-0.103130513213558	0.517851073133577	-0.199150911457039	0.842144697172261	0.904350032187252
PEAR1|PEAR1	40.8935615037128	5.34376453527242	1.59239025032966	3.35581339697736	0.000791319418987848	0.0054155056613057
AUTS2|AUTS2	148.090480327675	-2.73974873459612	0.87429829839626	-3.13365442849619	0.00172644046083028	0.00988882084277599
MGA|MGA	3459.40581744425	0.29474042707673	0.269754506694147	1.09262466339779	0.27455862939247	0.432782203464728
MIR6802|MIR6802	4.81676610939116	-0.0147480981547873	0.834052063068922	-0.0176824670878712	0.985892167699327	0.992971471522995
CASC4|CASC4	2884.26884014773	0.218677681328798	0.274908849861847	0.795455226118376	0.426348745945684	0.582501634204299
CTRL|CTRL	135.945015876786	-0.934481612166329	0.506819317042644	-1.84381609134228	0.065209946814148	0.156234763253957
NSMAF|NSMAF	1205.73750944117	0.665138747436566	0.259969754479764	2.55852358197438	0.0105117690322854	0.0396435462342569
LOC100505715|LOC100505715	6.24959450543173	3.40796999368768	1.3289620132356	2.56438480539436	0.0103358882398516	0.0391571150625146
SLCO5A1|SLCO5A1	68.5076489830291	4.93270743520035	1.55444000595752	3.17330190698601	0.00150715711399797	0.00891832118789279
MIR635|MIR635	13.4432115572798	1.42136738973999	0.888776306021944	1.59924086646939	0.109767093149038	0.227730025343992
MAGI1|MAGI1	1373.65830884952	11.5684804150444	1.32277045440785	8.74564470085868	2.21745850354526e-18	1.76721363375723e-15
DNAJC19|DNAJC19	338.352458797565	0.206344273009689	0.278551181914158	0.740776871208103	0.458828741049324	0.613486182934324
EDIL3|EDIL3	5.02333815690912	1.08001705520572	1.99433003870794	0.541543793777199	0.588132820735379	0.724342002385038
RBMS2|RBMS2	275.704102551806	-1.00421499910899	0.516989738036344	-1.94242733506327	0.0520853887999446	0.132062635116331
ROGDI|ROGDI	167.839674709957	-1.51532566310681	0.553907012742163	-2.73570405907133	0.00622469789205674	0.0266319248758982
RHBDL2|RHBDL2	15.236678177842	5.01121018538138	1.53725950120621	3.25983360743538	0.0011147759272637	0.00706118725892862
GLTPD2|GLTPD2	18.0658627882204	-2.01710011581953	0.78834654426349	-2.55864648674778	0.0105080538051465	0.0396435462342569
LOC101928489|LOC101928489	11.2339745205899	-1.72392874718115	1.36566536282779	-1.2623361433225	0.206827856342486	0.354721002176739
RPA2|RPA2	858.782204961032	0.301232144682512	0.299690454137089	1.00514427644972	0.314827382647042	0.475706096833299
SNORA54|SNORA54	3103.67678416633	-2.84717667854592	0.627711190720873	-4.53580678604149	5.73836968445695e-06	0.00011472892054385
RNA5S1|RNA5S1	13.0442096584514	-1.6957872997041	0.523469891568772	-3.23951258136746	0.00119734184026915	0.00746284908831818
ATP6AP1|ATP6AP1	860.840506278849	-0.231630913233668	0.38628895430075	-0.599631210405588	0.548752042221158	0.691979823073502
CASK|CASK	1385.12652932443	1.71220160741451	0.522980796146299	3.27392825899392	0.00106063535384474	0.00678938286197875
PCSK1|PCSK1	7.25989651478593	3.70873252909591	1.53178442279093	2.42118438725115	0.01547002814798	0.0529826344683132
FUT9|FUT9	6.71004501458086	2.98048290808734	2.34117397781658	1.27307194438706	0.202992513452043	0.349854294539926
SV2B|SV2B	5.29604678690055	0.826899042668913	2.35882894660618	0.350554898802066	0.725922297268972	0.828188159683555
DBNL|DBNL	2091.33238237667	0.534040527695085	0.276074047159836	1.93441047135407	0.0530626800118757	0.133766781976738
POLA2|POLA2	318.992507028836	0.430859674863314	0.254561790726222	1.69255438388512	0.0905403201108964	0.197984962896526
SNRPE|SNRPE	679.669318586747	-0.152129103941031	0.321132802218106	-0.473726454881767	0.635694985724863	0.762407838067858
SLC22A13|SLC22A13	7.52079858873752	3.21509715784235	1.31643742398905	2.44227116249856	0.0145951793711827	0.0507229494380467
FAM172BP|FAM172BP	441.668537898785	2.35112980061717	0.750991886617624	3.13069933578959	0.00174390602437368	0.00995633485032356
ERI2|ERI2	82.2240021540959	1.75614746507984	0.629823447342784	2.78831706328019	0.00529826613255065	0.0236252543494432
MIR933|MIR933	5.05907171677128	-0.15605553126929	0.784413489938472	-0.198945496566525	0.84230537966804	0.904467186533546
SEC22C|SEC22C	1448.58888085718	-0.259577891880587	0.281680721875785	-0.921532329766803	0.356772570151027	0.51745746304377
HEATR1|HEATR1	2033.76662803449	0.134007934692793	0.296046505929068	0.452658389843996	0.650794746479254	0.773900182448505
GATM|GATM	23.5292351643075	-0.0620565765410429	1.03157027386804	-0.0601573912248863	0.952030281096582	0.972838918090761
ARSG|ARSG	815.513666254142	1.47070388239418	0.422323811847808	3.48240814544499	0.000496925668236062	0.00379799378429942
CDCA3|CDCA3	91.1991944417026	1.86081033166127	0.652134158954019	2.85341644217178	0.00432519006583984	0.0201363668147557
KIAA0196|KIAA0196	1352.88305334344	1.03827648736451	0.179356181639461	5.78890829339599	7.08453616484202e-09	4.65217874824626e-07
C2orf66|C2orf66	4.63984041593288	-0.197926886549224	1.84865221739578	-0.10706550679827	0.914737011421829	0.950630313630427
CDKN2A|CDKN2A	114.840495311757	2.85791720999497	1.29371932085602	2.2090705177874	0.0271697363945061	0.081166636259137
C19orf70|C19orf70	263.75552950255	-0.0766144444499792	0.326619341062528	-0.234567996496301	0.814544051636668	0.887208849931398
MIR3179-4|MIR3179-4	3.70396781086444	0.270212199804287	1.03144022097259	0.261975628165334	0.793340232060747	0.874599741494032
EDC4|EDC4	1744.06770166471	-0.145562455329815	0.289876774777527	-0.502152873204591	0.615559990200129	0.746904185966952
STAP1|STAP1	52.6916785241881	-1.59339437520561	0.805860159994652	-1.97725915029251	0.0480123445888901	0.124250987110998
OLFM2|OLFM2	40.2116707461711	0.539275705007733	0.75107622829935	0.718003958438156	0.472754846091788	0.626830935743079
ERCC8|ERCC8	241.791078140605	0.89113362972609	0.300290815198871	2.96756871879657	0.00300165176707005	0.0151099513155438
RPS6KA5|RPS6KA5	359.78368846456	-0.434657661086438	0.381823387879289	-1.13837359073419	0.254964516814267	0.410306826370312
PDZK1|PDZK1	37.9305438339237	1.58741838126164	0.77204883022192	2.05611137420589	0.0397717821414797	0.107777226628526
FRMPD4|FRMPD4	486.419074256202	9.37130633318552	1.45555677332451	6.4382966744618	1.20821669576131e-10	1.47108773102661e-08
ARSB|ARSB	361.988634175051	-0.553820772785851	0.430640538091561	-1.28603957082206	0.198429251896393	0.345118179748809
GORASP1|GORASP1	618.390720950143	0.809541368303549	0.231571000247318	3.49586678573292	0.000472524538505571	0.00366420731252462
GPATCH2|GPATCH2	621.91623571543	0.676828655023627	0.349568989198942	1.9361804849298	0.0528455997387631	0.133449791188209
B4GAT1|B4GAT1	74.26017546096	0.409484357914274	0.465457343200971	0.879746262242276	0.378996781733111	0.538881726877515
GEMIN2|GEMIN2	183.413274994707	0.444412072462694	0.393218950809611	1.13018986380916	0.258396229939308	0.414611613391222
LGALS1|LGALS1	2226.47302968064	-0.411382801799762	0.517834480951134	-0.794429140840821	0.426945645132287	0.583175287948301
SDK1|SDK1	13.1173956061127	-3.43923461184364	1.68210413811402	-2.0446026699035	0.0408940460758419	0.110002348856664
AKAP11|AKAP11	2696.609704873	0.741948024275025	0.334009791243772	2.22133615159062	0.0263282020188541	0.0792739766437521
ADCY5|ADCY5	14.80165319177	1.67348436293468	0.92902157653442	1.80134068487125	0.0716491989523024	0.167385130610355
SLC35D2|SLC35D2	465.130244669907	0.0663172955076807	0.451406857707577	0.146912467932956	0.883201110720055	0.931063527411552
GATA6|GATA6	39.8217682031601	3.18080578450944	1.55160354393841	2.05001193567505	0.0403632660943002	0.10893343522551
CTDSP2|CTDSP2	4122.55394299821	0.132900625335422	0.249530495663612	0.532602738522921	0.594308606045932	0.728825123438716
OLFML3|OLFML3	7.25678003796428	1.31164624479416	1.28312675832286	1.02222655422491	0.30667368551385	0.466786155752612
AATF|AATF	1208.37667043762	0.176872344454784	0.144189788020835	1.22666346127942	0.219949106289782	0.370057353476513
ZNF202|ZNF202	300.918758849297	0.327553047199639	0.287974456542094	1.13743785172057	0.25535529126801	0.410784872171943
SERINC1|SERINC1	7136.07748647627	-1.00112310983177	0.259268991466446	-3.86132990362381	0.000112771509788157	0.00122162061695205
C11orf45|C11orf45	5.23082566805647	3.19769258737266	1.75617564325139	1.82082731853201	0.0686331102281377	0.162263258040715
PRF1|PRF1	1517.51247649741	0.643802206418812	0.58318453118077	1.10394252933169	0.269618068566621	0.427376692539424
RNU105B|RNU105B	4.54336015540725	1.18596477859763	1.19939507302609	0.988802443222837	0.322759808646417	0.483670745726293
SMCHD1|SMCHD1	12159.6761283344	-0.538470110204158	0.344323362025732	-1.56385005953769	0.117852784971226	0.239101235697814
NDUFAF3|NDUFAF3	480.104079762257	0.370232031116293	0.319767139167818	1.15781762966579	0.246938467349978	0.40136943988571
ZFP69B|ZFP69B	76.8012948341726	-0.115277358536173	0.492827305474697	-0.23391025062042	0.815054655104608	0.88762436670917
LOC101929717|LOC101929717	4.07485663475334	0.275121474810379	1.34378994721392	0.204735476240753	0.837778801433112	0.902037320408177
CCDC80|CCDC80	18.0327461681212	2.96456486725761	1.60926655848034	1.84218385178967	0.065448261682421	0.156591753831589
CCDC88A|CCDC88A	1279.32428484987	-0.835729576065426	0.566408374148493	-1.47548944226295	0.140081004648188	0.269805586564504
RNF123|RNF123	754.551944474509	1.39766670733593	0.302718632687628	4.61704882493364	3.89235716879957e-06	8.39418182540749e-05
PDS5B|PDS5B	1686.9052663618	0.52916010579035	0.375250003862332	1.41015349858459	0.158494363208669	0.294904135640198
[truncated: 16,254 more rows]

## Sheet: DGE Lymphoma vs Donor
	baseMean	log2FoldChange	lfcSE	stat	pvalue	padj
[truncated: 17,991 more rows]

## Sheet: DGE_HBZ_vs_CTL
	baseMean	log2FoldChange	lfcSE	stat	pvalue	padj
[truncated: 2,199 more rows]
