# Supplementary material for: CircRNA signatures define ATLL subtypes and uncover the HBZ-DHX9 axis in tumor survival
Source: Research Square preprint supplement (doi:10.21203/rs.3.rs-6001314/v1), 2025-02-13
Supplement: Supplementary file 3 [file ca668637c510e2ad47b57ca5.xlsx]

## Sheet: DCE_ATLdiag_Chronic_vs_Dono_sig
	logFC	PValue
chr1:103565435|103575540	-3.48925870370251	0.00194648805358505
chr1:108148279|108161293	-2.37533860863329	0.0106821683683138
chr1:110891392|110892533	-2.04050493960296	0.00926328332930575
chr1:111147642|111161296	-1.80771437986485	0.0479165863255882
chr1:112653598|112667145	-2.50180068401386	0.0317256360220717
chr1:150440923|150446401	-2.7186655764492	0.0165177317910667
chr1:151117392|151118139	-3.30562757069021	0.0175444508958838
chr1:151166934|151167414	-2.27374745597291	0.0022140513786141
chr1:154234591|154235291	-2.42152273576575	0.0247795519150479
chr1:155675010|155679512	-2.7029834699034	0.00145712764750486
chr1:155675010|155680456	-2.81625499228113	0.0253594490930925
chr1:155676548|155679512	-2.30959839967011	0.00229226472859964
chr1:155725382|155726019	-1.72530322606318	0.0234149254269413
chr1:155853276|155853806	-1.42930049633259	0.0452212695898021
chr1:15638307|15643650	-2.13009172577408	0.023617662456726
chr1:160323431|160332557	4.51990970950675	0.0182119191808814
chr1:175986943|175989479	-3.16493591888588	0.00929770591149014
chr1:176116624|176136547	-2.95837575307782	0.020782181836921
chr1:179347600|179350431	-2.41665251369301	0.0493588478744068
chr1:186318447|186318828	-2.47939929754139	0.0357354397000653
chr1:197583152|197611976	-3.08362358691136	0.0230720091091801
chr1:197642711|197658369	-2.42952159230906	0.00536966593610648
chr1:205616478|205623891	-1.41217776242809	0.0495189061597198
chr1:22078429|22091501	-2.91878278767624	0.0115322338753405
chr1:223954477|223962273	-2.43026128875402	0.0474597867244362
chr1:23030469|23050520	-1.82990040365728	0.0134333787716672
chr1:231537213|231542611	-1.74215224106065	0.0363665760252652
chr1:231795242|231818517	-2.10255305555435	0.00909203480651295
chr1:233090061|233095863	-2.71849468887933	0.0079259505178542
chr1:233217899|233227371	-2.56250905312502	0.00494118163483112
chr1:23814190|23820593	-2.72382963026167	0.00986550820842706
chr1:243695591|243843282	-2.05492615463016	0.0478272412487451
chr1:244843135|244848856	-2.4916743050193	0.0443123465405344
chr1:247157000|247159813	-3.34275839713656	0.00296644154710626
chr1:25242374|25243633	-3.10275199057994	0.00364095258582766
chr1:26446316|26447660	-1.86506639615545	0.0183841429908139
chr1:29154696|29154910	-3.27938930606849	0.000437526218089965
chr1:31915895|31919658	-2.88199686985985	0.000197159560627766
chr1:32279671|32280210	-1.97766780501414	0.00834332420598843
chr1:32631827|32634792	-1.58659552100737	0.0480968108787978
chr1:40189055|40202614	4.14368640880996	0.0355616291932976
chr1:41070595|41075451	-1.69479765793197	0.0197556885311479
chr1:51827796|51834170	-1.72581620329205	0.0397413856355742
chr1:52493611|52509712	-1.91947672524445	0.0128617016341673
chr1:58506060|58534331	-2.03940372276049	0.0372812156864184
chr1:58506060|58536741	-2.01969765750065	0.00928011095635985
chr1:58527261|58536741	-2.46267683733416	0.0460101253738856
chr1:66891154|66905375	-2.10779626421464	0.00595719971312644
chr1:67326735|67338703	4.15876650712427	0.0366093728525066
chr1:805799|810170	-1.73823301949792	0.0187390353985535
chr1:92333391|92380873	-1.47215781514599	0.045185996333455
chr1:97515726|97549744	-1.97952966427133	0.0280522162924566
chr10:100260218|100262063	-2.09743380901495	0.0286569348406418
chr10:101939863|101957732	-1.86261015422827	0.0390709881303282
chr10:110124017|110130486	-3.33429813369365	0.00101309789816648
chr10:114970368|114974385	-2.06406786525844	0.0178115361470763
chr10:11997672|12014184	-2.10227462791469	0.00693821583678464
chr10:124681607|124696212	4.30239839006089	0.0275675710256852
chr10:124706636|124706887	-3.54313728064361	0.00131135219440772
chr10:130166507|130171636	-3.07812783090682	0.0110829867123479
chr10:131308211|131309299	4.70367606058371	0.0124345609183105
chr10:15833630|15847943	-1.58491181897552	0.0336289307047394
chr10:16752539|16782084	2.01390427122711	0.0336070469415103
chr10:26500819|26513660	-2.14927082685592	0.049490823621903
chr10:27117576|27121448	4.12447872513684	0.038254302325091
chr10:27142387|27145590	-2.06545359256839	0.0065977295285865
chr10:32034690|32037607	-2.98472175954208	0.0365699163017232
chr10:32565558|32584304	-1.51945787872356	0.0345387568645453
chr10:4830675|4909606	-3.57593872807108	0.00798354098313853
chr10:48401612|48410168	-1.86645916906386	0.0190618531297168
chr10:5785142|5800705	2.65095325052292	0.0464539014110812
chr10:60084602|60085253	-3.36496673419734	0.00443899300368944
chr10:62388396|62399793	2.62074707594913	0.0489161698570695
chr10:68747161|68747566	-2.96443170226569	0.0274449286015494
chr10:68959806|68960249	-2.30367794206467	0.0096840066009964
chr10:7276892|7285954	-1.74215624650369	0.0160298613475143
chr10:7797047|7802854	-2.00552733440169	0.00552045253298868
chr10:84417771|84425893	-1.81321241531781	0.0124770537740697
chr10:84438282|84477664	-3.38617533206254	0.0150477307332243
chr10:84438512|84477664	-1.62110488027393	0.031603058739104
chr10:863743|885760	-2.74916754523232	0.0376019447127993
chr10:87767673|87776427	-2.12849714386294	0.0296458912152819
chr10:88893871|88905660	-2.10580395638651	0.0431328176301963
chr10:93381219|93389154	4.27725687561974	0.030236836302221
chr10:93676653|93687449	-2.81689128712049	0.0183729561461826
chr10:97436417|97437750	-1.80029978137658	0.0128378076844104
chr11:108176246|108177090	-1.87215152256408	0.00951780850364196
chr11:108227595|108229323	-2.5464203745665	0.000644147780910419
chr11:108235670|108245026	-3.08107366756295	0.00247853230023535
chr11:108258986|108267342	-2.88994898355904	0.00717486036012157
chr11:108267171|108267342	-2.08236151754867	0.00394156992308048
chr11:108299714|108304852	-2.99875364528629	0.0200348767528703
chr11:110136663|110137414	4.79432215130901	0.00975218242908393
chr11:118581246|118584644	-2.53929657526877	0.0256659882041142
chr11:119273868|119274953	-2.1196768886672	0.0286404317998106
chr11:128768118|128772985	-3.47239915634306	0.000712645665718735
chr11:14771937|14789242	-1.84428158295924	0.0110899314298794
chr11:2768844|2778037	-3.57017961830874	0.00491295853948172
chr11:34071726|34076642	-2.40085021760069	0.0294209093927159
chr11:34089395|34092056	-2.95571912454601	0.0155584651300387
chr11:34957384|34978182	-2.10511374638239	0.0214091544032203
chr11:61437625|61438113	-1.98663809720243	0.0190076663774299
chr11:66639700|66640123	-2.22829241386831	0.00289407121158258
chr11:68567014|68576043	-1.90545737505982	0.0253899099134585
chr11:68760225|68761687	-3.18120041795708	0.0265359296777169
chr11:73707420|73718890	-2.34048800291922	0.0134918346157318
chr11:77683710|77693611	-1.41349760529776	0.049562728062254
chr11:85996826|86003451	-2.04999569292657	0.00804515427681556
chr11:95812932|95813589	-2.24666837228614	0.0220237907073279
chr12:111509549|111510582	-1.84927745568826	0.0397573251192949
chr12:112502144|112506422	4.30160629534034	0.0291307089371612
chr12:116230533|116237705	-1.47009571525543	0.039908925628724
chr12:11869424|11869969	4.10220615213679	0.0396714613366997
chr12:120557282|120557682	-2.52560192826295	0.00118174015663871
chr12:120782655|120784593	-2.42726097815249	0.0011260559482822
chr12:121780872|121781192	-1.65527712704881	0.0267892932484006
chr12:122340753|122341697	-2.28518543955272	0.00587261731475895
chr12:12244262|12244655	-2.80767017038124	0.0456323984496993
chr12:122511109|122515227	-2.60256525958956	0.00834651195492542
chr12:124419957|124437996	4.34057606469997	0.0260189179104244
chr12:128808788|128815070	-2.83670246963528	0.0312443568288031
chr12:1289852|1290012	-2.44765316759077	0.0482302053751333
chr12:2820086|2821792	-2.27118596916189	0.00578577236506592
chr12:32607957|32611283	4.37881112323099	0.0240286882891167
chr12:350621|354234	-2.70385542663818	0.0427744062750345
chr12:42210355|42210619	-2.73319340551307	0.0110551449851931
chr12:42210355|42210680	-1.73585292192143	0.0185688014201199
chr12:42210355|42212484	-2.68948376202744	0.0170906425700718
chr12:45945249|45964188	-3.05462399129137	0.0325986524283278
chr12:46229153|46243314	-2.00747411569984	0.00860053919145596
chr12:46239679|46243314	-2.44166740637651	0.000893402166973204
chr12:47104113|47108164	-2.2799366367788	0.00193477584911342
chr12:50780140|50809589	-2.86019603345647	0.0259483068609417
chr12:51055835|51056502	-2.798565037817	0.00855043446687801
chr12:57395749|57398198	-2.09061749914766	0.0208448194171168
chr12:69800209|69801721	-1.81954439486051	0.0113224287055757
chr12:71769800|71774022	-2.90533904774543	0.0212409687674184
chr12:76487510|76537986	-2.69670061366737	0.0144669796718633
chr12:94169153|94186473	-2.13747775334506	0.0157596608969526
chr12:9680923|9694969	-2.11598985474653	0.0115265723459398
chr13:108243532|108251316	-2.46107986699864	0.0359686083913019
chr13:114147992|114148962	4.54167792253628	0.0176103079767101
chr13:21400373|21421164	-2.79101792006781	0.0469170495876975
chr13:27427092|27430621	-2.52784644923182	0.0155248611675354
chr13:40826506|40855815	-2.41338680243575	0.0205663083964633
chr13:40836597|40855815	-3.31372673673206	0.00499489506913814
chr13:40942952|40943925	-3.40818025857224	0.00130358764407046
chr13:41466823|41468838	-3.51885892290504	0.0112190818166022
chr13:42926336|42970670	4.45528500294142	0.0208588686706868
chr13:45336536|45337388	-3.48811987674219	0.0116927360147916
chr13:45516143|45530780	-2.6033613191634	0.00929699902412866
chr13:49451553|49451909	-1.74419689268652	0.0180982444932353
chr13:50927407|50949505	-1.64398875097171	0.0220350591439852
chr13:77719532|77753358	-3.11912136276056	0.000306561418354976
chr13:99238427|99244624	-1.60921992839474	0.027558100366613
chr13:99243832|99244624	-2.30991897160192	0.0474095977699748
chr14:102040236|102040673	-2.00570411942672	0.00561594982972541
chr14:20395450|20395949	-3.05921356008047	0.0183714938780351
chr14:22909483|22911403	-1.96397054515783	0.00848639433873631
chr14:24209890|24211829	-3.14971505161929	0.0154785777113234
chr14:32090502|32094386	-1.68715250135884	0.0255228895455096
chr14:34575756|34609742	4.20613642267461	0.0326451967222858
chr14:34862044|34862322	-2.20481079753145	0.00297712868907911
chr14:35096558|35099384	-2.71007756720511	0.0324326702776882
chr14:35126735|35127611	-2.32401606031542	0.0169038430291124
chr14:35126735|35180777	-2.69142269963695	0.0287588530993858
chr14:45118028|45130790	-1.81362111622641	0.0116350576434285
chr14:49663315|49674427	4.08157651210689	0.0398349036911574
chr14:52511240|52544371	-2.31045024988795	0.0174742997817992
chr14:58318542|58330169	-2.49521409658576	0.0154299771339335
chr14:59263441|59291306	4.49342345253162	0.0185821422760447
chr14:60149353|60153178	-2.40382160630618	0.0373748627704591
chr14:61721509|61721823	-2.60049222934362	0.00445425593355635
chr14:65561337|65629606	4.66763483164871	0.0134259316759116
chr14:67685015|67690421	5.21870797524151	0.00339471002028547
chr14:71400794|71418196	-2.41233724599285	0.00946412765333476
chr14:71413948|71418196	-2.52775781405546	0.000880650900530547
chr14:71413948|71467247	-3.49869246179235	0.00941735391065139
chr14:71413948|71529370	-2.67118107337419	0.00361655190855593
chr14:75109685|75110371	-1.80550675781439	0.0149401498997627
chr14:76166663|76180849	-2.26978756999483	0.0262046257159902
chr14:85978970|86070967	-2.93268676647613	0.0291062338236831
chr14:91338005|91343657	-2.22720519759551	0.0412979084440209
chr14:91342380|91343657	-1.95892078782031	0.0170180281072613
chr14:91797785|91802421	-1.88147826917576	0.0484714308605241
chr14:99231345|99257836	-3.69237031908005	0.00145801468923603
chr14:99231345|99257839	-2.40519154309417	0.00875580528446954
chr14:99257471|99257836	-2.17379405395351	0.00321643642993236
chr14:99257471|99257839	-2.21258327763868	0.00684013348634544
chr14:99458279|99465813	-1.99990030890072	0.00777101820370361
chr15:100330889|100334180	-4.10312941756774	6.43308982718627e-05
chr15:100564692|100566453	-3.03209120431652	0.0255513182412874
chr15:25354353|25360527	-3.33720662449493	0.0109143118452851
chr15:38502312|38505920	-3.03212392463329	0.000402163757924253
chr15:42827928|42840433	-1.90334376295811	0.0385513149941332
chr15:42950262|42966286	-3.25846657135122	0.00920060108915696
chr15:44331988|44338317	-1.6575751035021	0.0267671905787845
chr15:44484224|44490999	-2.80719374554065	0.0265310354995678
chr15:51781044|51782828	-2.43128591858467	0.0246521264456829
chr15:59030804|59031702	-2.14570915636152	0.0348224679288556
chr15:60442416|60445791	-1.78583419925088	0.0190107652980897
chr15:64204441|64204949	-2.7700761756806	0.0378526334174951
chr15:64499293|64500166	-1.76797439238605	0.0171044973295678
chr15:68141946|68146700	-2.87496559284866	0.00134349646521259
chr15:68175637|68176654	-2.67786273347264	0.0187021042807808
chr15:76287846|76292700	4.69272206650924	0.0123464725459736
chr15:82382208|82382879	-4.68493275538603	6.09055900845925e-05
chr15:84680713|84691644	-2.46544192045463	0.00373577802879382
chr15:84687625|84691644	-2.59410586176265	0.00550438902521391
chr15:85113873|85121014	-4.08161197133065	0.00138252422797903
chr15:90439332|90443478	-1.73580605191853	0.0183752831280176
chr15:92996957|93002317	-2.32879773607503	0.013624097180173
chr15:99598430|99633173	-3.28039646029938	0.00845219010433341
chr16:10419581|10473989	-2.42577083321929	0.0191561193345398
chr16:21612645|21625115	-2.41261877429524	0.0388702495869314
chr16:27213585|27215008	-3.31785663069361	0.000259716658270255
chr16:30483827|30484263	-1.71600735539614	0.0183730283826827
chr16:30713208|30713711	-2.72911731180572	0.0403856777487278
chr16:30728966|30729572	-3.03866902312198	0.000202505990565809
chr16:31090775|31091342	-2.29556224804525	0.00234930092612903
chr16:47497399|47515601	2.79816129189983	0.00917582625588141
chr16:53439016|53447106	-3.10828998062291	0.003487450166478
chr16:58559804|58560362	-1.8137784119277	0.0127188477166134
chr16:66805777|66806026	-2.7513882809266	0.00977998232707717
chr16:69370483|69372355	-1.50957382005638	0.0423029773318127
chr16:71745144|71745614	-3.06669716048996	0.0323753665170707
chr16:8920359|8930397	-2.3854056837712	0.00463159361244808
chr17:12054889|12113360	-2.17618832983096	0.0321384423859348
chr17:12081356|12095694	-2.38481779363133	0.00531689086100676
chr17:18865469|18865952	-1.93993569656633	0.0353134206955697
chr17:28163543|28172618	3.02029565468708	0.0173315110417225
chr17:29451455|29451680	-2.13379946666901	0.0480089218198377
chr17:29676820|29677741	-3.07381857076606	0.0320917537712992
chr17:30803901|30804108	-3.35850060024286	0.0024714244303154
chr17:32030656|32031458	4.2997832991686	0.0276521974885578
chr17:39709813|39715939	4.16660887804585	0.0354968049751407
chr17:4066447|4072756	-2.08671648685847	0.040054227861071
chr17:42727635|42730918	-2.49213704909829	0.0418016713820737
chr17:47618350|47619164	-2.78256700074032	0.00390703459938457
chr17:48396680|48412537	-2.86807059932059	0.0326719206567347
chr17:49311312|49312042	-2.4074544831226	0.00100951138633878
chr17:49311312|49312845	-1.78294802931886	0.0337980397071126
chr17:5365122|5368468	-2.7642316535137	0.0212327866531373
chr17:55401469|55403868	-3.03074438781343	0.00634960964578092
chr17:56844019|56848065	-2.13978413648054	0.0497472284153298
chr17:59731421|59738947	-2.35719499327889	0.00184936847714558
chr17:59764971|59773885	-1.84973966963563	0.0443795771125158
chr17:64490824|64492367	-3.38211974969462	0.00727165115803445
chr17:64519321|64526200	-2.98258151198278	0.0370181774878124
chr17:67891844|67894165	4.60693356249211	0.0154228199430344
chr17:68209654|68210465	-1.96109866587846	0.0412070524799272
chr17:69273959|69284072	-3.06669716048996	0.0323753665170707
chr17:75042181|75042659	-2.63105948718469	0.0105886042978259
chr17:75242336|75243570	-2.52877466615752	0.00142749420755868
chr17:77402059|77402703	-2.73853975959239	0.00629029310121019
chr17:78004170|78031842	-1.71479401874901	0.0375979713543573
chr17:78400735|78401057	-3.18108991271504	0.00357027666186482
chr17:79077430|79077864	-2.36193750091125	0.0150824608098
chr17:80289659|80290728	-2.74587110138829	0.0409251658452586
chr18:23507985|23509279	-2.98534634285698	0.0104885892783858
chr18:2666157|2674145	-2.31264360850492	0.0359392183169913
chr18:2724899|2752552	-2.97500803911191	0.019633820988895
chr18:54271360|54277853	-3.12076717715292	0.0295915784065326
chr18:58709378|58735329	4.11441430964122	0.0392181778605388
chr18:76849526|76851939	-1.5551412963286	0.0331840193861588
chr18:79695225|79704917	-2.46500564495666	0.000982534712139613
chr18:9182382|9211784	-2.90034746023085	0.0229126096206755
chr19:1032392|1032696	-1.64613194487694	0.0240640269273822
chr19:14042453|14042789	-1.80934115475672	0.0387242936529883
chr19:14458031|14458375	-2.12287361767122	0.0372725619535075
chr19:17276495|17276909	-1.56678750142773	0.0341061315837869
chr19:18175040|18175697	-1.70108990784685	0.0463422906369722
chr19:18342859|18343415	-2.37328564475118	0.0199652438481408
chr19:18537601|18538436	-1.81552875217858	0.0263737384800416
chr19:18539371|18539720	-1.66944090802177	0.0238767141512815
chr19:19296989|19297344	-2.29659577377293	0.0442881797021574
chr19:19492306|19492712	-1.99001546928606	0.0307128594054353
chr19:20645684|20646405	-2.93286931480476	0.000255159127581499
chr19:21033456|21034184	-1.47641256371529	0.039738807086372
chr19:21405129|21405856	-1.75994323741107	0.0202258860943552
chr19:21987216|21988909	-3.74280743523884	0.000612999465956141
chr19:22072809|22073564	-2.73258780355746	0.000819687258981425
chr19:29985223|29986417	-1.4814826158499	0.0402853252045404
chr19:34221507|34221738	-2.78872308119626	0.0346756063939446
chr19:34430576|34434968	-2.05407075449454	0.0113088829139049
chr19:3660966|3667353	-3.53208401107439	0.00550203483684267
chr19:39453356|39453521	-1.83571980755302	0.044240312801675
chr19:40034950|40036626	-2.37510066445719	0.0196368839208449
chr19:40583398|40583717	-1.6217768491557	0.0237909004304805
chr19:4354949|4355173	-3.03068475003134	0.0196182710287248
chr19:47264603|47264946	-1.73565289295097	0.0303265379611095
chr19:47362476|47362693	-1.79000948932517	0.0458379879415515
chr19:48149763|48151339	-2.9592468515061	0.0276659600691308
chr19:5039836|5047669	-3.00486427009179	0.0195466425765597
chr19:54633016|54697945	4.64204376680923	0.0144051371285482
chr19:54909245|54910065	4.40507594444805	0.0228535933877325
chr19:5604583|5604936	-1.94283000810185	0.00734865591605204
chr19:5941621|5957973	-2.60600983934477	0.0265633389818824
chr2:119926598|119945240	-2.37852352861045	0.0104865109421668
chr2:121757240|121758806	-3.02478765661343	0.0136976086344257
chr2:147972739|147975975	-2.66869447154907	0.000424297759119319
chr2:172558708|172565073	-2.7776274304917	0.0479542236796875
chr2:185483034|185502739	-3.50115400822759	0.0117649034904219
chr2:186081330|186099830	-3.5716009187855	0.0080681532233308
chr2:195680032|195681050	4.07376284402745	0.0416971569797891
chr2:196139620|196146055	-1.85467024020461	0.027008639553941
chr2:197078703|197090032	-2.97476743112352	0.00738003783209644
chr2:199368605|199433514	4.1725614195073	0.0347908646413772
chr2:201145378|201149835	-2.28461247318612	0.00179780364280358
chr2:202297379|202297906	-2.17811464231996	0.0104615418179997
chr2:20739971|20740205	-3.06590736828873	0.0319726166525097
chr2:207724800|207742342	4.19361014310139	0.0336227427098082
chr2:213021993|213057099	3.97478879747097	0.0471994173140884
chr2:218656150|218656463	-4.01780392878264	0.00171739544908112
chr2:230357805|230361697	2.10064217907588	0.0090135762539803
chr2:233388257|233398449	4.66110410264299	0.0127299670338286
chr2:26364302|26373629	-2.05059096134549	0.0129113379321852
chr2:32377588|32380290	4.43884403476336	0.0220415401447688
chr2:32377588|32406557	3.97785821984056	0.0471063539813189
chr2:37019809|37020836	-2.35858524810273	0.0397452694680618
chr2:37316237|37317179	-2.65339399736735	0.000635409256681614
chr2:39331917|39337581	4.05276519993813	0.0426929941660504
chr2:43578513|43590954	-2.64972355457705	0.0455435267574227
chr2:44209210|44218537	-1.95917494057903	0.0213519159465265
chr2:48346201|48362707	-3.53243819015871	0.00870769267865895
chr2:53887259|53893799	-3.25454681911058	0.0233118218197536
chr2:55025086|55028220	-2.95651174399228	0.02798340188693
chr2:61482957|61490776	-2.75229616042827	0.0372634431775428
chr2:61495455|61499894	-2.18001829346639	0.0477838504778507
chr2:63433745|63439871	-3.09551136986211	0.011361026496969
chr2:63856306|63857936	-2.26466656264467	0.00939336636843225
chr2:68490190|68513680	-2.83156623235582	0.00550314121489477
chr2:71396141|71418639	-1.78212757525123	0.0146282405449911
chr2:72718103|72733118	-1.95053762603913	0.00768575219194655
chr2:75670138|75672016	-2.69697929750467	0.0425079360720467
chr2:84870225|84870785	-3.77767656072068	9.92907577623187e-05
chr2:85861181|85863485	-2.90066563983364	0.0026024481629068
chr2:86159536|86162079	-2.86431111457745	0.0446630084188055
chr2:8888018|8958642	4.62961481936169	0.0145592201372715
chr20:20653530|20680801	-2.76635477540654	0.0488073716022839
chr20:21339044|21344208	-2.29811395832999	0.0184560799280519
chr20:32366384|32371874	-1.79447529871053	0.0253146060956966
chr20:33619517|33623296	-2.0975103801997	0.00572995963072438
chr20:34031522|34033318	-3.07960119617779	0.00210613633759527
chr20:35858302|35871829	-3.44479264874178	0.00146760583990228
chr20:50902017|50904001	-2.80681775514809	0.0188385178294335
chr20:51516784|51523596	-2.65813917285755	0.0152433197381493
chr20:53953432|54028972	5.48824568677802	0.00172243507013954
chr20:53985287|54028972	4.04024351536659	0.0447434924754177
chr20:54157169|54171670	4.14620175010618	0.0362421855978874
chr20:58667490|58673711	-2.76106236700681	0.036722650626363
chr20:63928335|63931022	-2.02623425949552	0.0177212695919191
chr21:34102835|34125480	-2.22908123034758	0.0403326794911349
chr21:36247517|36248568	-2.7934752162799	0.000538254584318632
chr21:36338774|36344707	5.57432505323456	0.00133740380491037
chr21:36338779|36344707	-1.73572249676436	0.016277006832235
chr21:37420299|37421866	-2.37850467025328	0.00145875083149376
chr21:44855210|44861271	-1.52166271059466	0.0414356965136961
chr21:45128402|45134832	-2.58737487400849	0.00739080235235926
chr21:46643535|46644488	-2.58846386514582	0.0176183878996813
chr22:31602212|31602785	-2.54106662376935	0.0086259596318035
chr22:32478981|32479275	-2.35335792619615	0.00160898009278398
chr22:36341370|36349255	-3.07223699402232	0.00646336438629713
chr22:41338313|41339191	-2.20644155976597	0.047295376208325
chr22:41808875|41810291	-2.42085034628572	0.0117234034996935
chr22:46343262|46346544	-3.53270358597414	0.0109511063909212
chr22:46707843|46721015	-3.87805888124156	0.000536771963175206
chr22:49797805|49799119	-2.03769184929905	0.010883199112233
chr3:109054728|109069757	4.16633789827075	0.0339566417683878
chr3:119503532|119517315	-1.89734835109195	0.0320866334389559
chr3:123931102|123949132	4.51263833434329	0.0188341181367341
chr3:128262128|128264781	-1.7977160724041	0.0440629159778821
chr3:128806372|128807671	-2.80990446627349	0.0338704763237507
chr3:129880309|129880559	-2.28994523052179	0.00401719351022931
chr3:136464881|136502779	-3.15113479408662	0.0280236622520661
chr3:138570318|138571356	5.75404833033541	0.000670171631368628
chr3:142425222|142426841	-1.90919108257284	0.0421221470132001
chr3:143795001|143832221	5.00422223226714	0.00596010971855464
chr3:149846011|149872154	-1.73396934265542	0.0279540098284525
chr3:151116338|151127984	5.64323381922261	0.000940009520676788
chr3:152414941|152432920	-1.85840839634206	0.0170714040569656
chr3:15411245|15415942	-3.31877470730895	0.00221189452824847
chr3:156694020|156696025	-2.22936565369601	0.0300510680320914
chr3:16294856|16303592	-3.25454681911058	0.0233118218197536
chr3:16301626|16303592	-3.09584329414006	0.00223808356253342
chr3:179203544|179204588	-2.62367675148181	0.0032019888386386
chr3:183205876|183207823	4.44465146251192	0.0210334651446297
chr3:18378170|18420991	-2.52554979521138	0.00243601842112363
chr3:18415111|18420991	-2.47504226260202	0.020741154110344
chr3:18463480|18527326	-2.50790025513695	0.0138161602572681
chr3:195381009|195392147	-1.70049988928893	0.0212132368300824
chr3:195878253|195888606	-2.66723806778279	0.0136559658225592
chr3:195959183|195960086	-2.30527097645417	0.049727501448213
chr3:196806579|196807914	-2.65535817174535	0.00285062774026074
chr3:19950806|19951061	4.17130174931757	0.0356720855570509
chr3:20071584|20072459	-3.08991850280053	0.0228480068881619
chr3:3156219|3174261	-2.05230378455461	0.0138556875975594
chr3:31576396|31580096	-2.61904507525583	0.000508952003139984
chr3:31576396|31600459	-2.26652627873213	0.0473336003616864
chr3:33812072|33822082	-2.7288328259321	0.0122230810143946
chr3:37383226|37386370	4.93099017253596	0.00729936722446571
chr3:43299754|43303792	-2.24096433416442	0.00290291647414194
chr3:4410865|4420146	4.20456737190283	0.0327129431252751
chr3:50113383|50114251	-2.56497854391162	0.0373205265647648
chr3:52412811|52414587	-1.56566842755209	0.0414945298629354
chr3:52737586|52741499	-2.66699181587994	0.00371592421249331
chr3:52926031|52928341	-2.30781771716112	0.0137271188881814
chr3:53874211|53876080	-2.42814226608094	0.0401580719343186
chr3:56627037|56628614	-2.39518311147194	0.00152193987980586
chr3:60011371|60014264	-2.72004317897482	0.0169376843700088
chr3:66405198|66462509	-2.52407140760265	0.0136260905045776
chr3:67400731|67409034	-3.87849756365785	0.00310118649737502
chr3:67495798|67508903	5.89875728307073	0.000394244300829848
chr3:71015549|71053773	-2.86105828081581	0.00830843119078122
chr3:71041328|71053773	-2.02066032872396	0.00678159813866343
chr4:102580535|102582957	-1.77697814094301	0.0274300757673739
chr4:104518577|104519454	5.11900460739105	7.35616707471319e-07
chr4:105446383|105456745	-1.8999090358362	0.038942418990108
chr4:109659011|109664394	-3.05158845621568	0.0013020920860184
chr4:109940946|109945275	4.05544978732189	0.0403413616944023
chr4:119596523|119607297	4.73708156472737	0.0110945735735876
chr4:127921524|127939997	-1.67903860651186	0.0345578646613815
chr4:139125164|139139497	-1.91811295391884	0.0261395673869863
chr4:143543509|143543972	-1.62039844085926	0.0377210198530322
chr4:152411303|152411872	4.99702964441998	0.00650698042226592
chr4:15816511|15825016	-2.41898967322791	0.0482115957866633
chr4:165989381|166025431	4.71889792712313	0.0123857365468391
chr4:166039339|166060188	4.16547620119352	0.0353362867375039
chr4:166039339|166065863	4.18264631527652	0.0345726817868752
chr4:166039339|166078030	5.35161803112414	0.00249229422848206
chr4:166055076|166078030	4.31955313253358	0.0272275222322102
chr4:169507037|169508331	-2.40103107160355	0.0323798885779007
chr4:173384651|173403950	4.34952818590251	0.0260974601440694
chr4:185247294|185267155	-2.63484015615969	0.0117198272423225
chr4:185418441|185418770	-3.29646143475743	0.017695656003128
chr4:36107565|36121326	-2.59787878031687	0.0475669453405643
chr4:37631385|37638504	-1.87598766559092	0.00956059864005107
chr4:42616033|42627109	4.26414767543792	0.0297901404666457
chr4:51863437|51877854	-1.92271462102578	0.0144464291269989
chr4:55453054|55456300	-2.79101792006781	0.0469170495876975
chr4:77726167|77776392	4.12820541268905	0.038310809767263
chr4:83308845|83310078	4.29608583380653	0.0281928989322419
chr5:103096541|103097781	-1.85806192536055	0.0140851555898867
chr5:10415488|10417404	-3.22524576688531	0.000616071420439683
chr5:1057471|1065478	-2.57897332028404	0.0291987620837096
chr5:1060344|1065478	-2.82188789514673	0.0137904712667154
chr5:109713520|109729513	-2.32489377807049	0.00267478517679111
chr5:134158455|134174022	-2.74046864874808	0.0324731311813521
chr5:137942875|137943216	-2.49796661867814	0.00746961828292295
chr5:139600372|139623461	-1.92333849254617	0.04794991433581
chr5:139614586|139623461	-2.78462545787648	0.0475465846368529
chr5:141580744|141583615	-2.5249734588084	0.0388599278909488
chr5:142885298|142932125	-2.941156901913	0.0084800935720941
chr5:143054439|143057747	-1.64131994733408	0.0394293436538846
chr5:151790323|151791062	-2.00911594176508	0.0237847070704729
chr5:151797227|151799313	-3.10315985381783	0.0300108484393476
chr5:154033791|154034967	-1.66141002502138	0.0260376977552887
chr5:156948416|156949731	4.20776002851979	0.0344914066497589
chr5:176943335|176951577	3.9298271200788	0.0498384550919503
chr5:179560025|179577136	-2.59961693660961	0.0299309441033406
chr5:179705679|179710065	-1.88982749816022	0.0281752560805225
chr5:38990949|39003622	-2.71531079724507	0.00191162367245676
chr5:39002535|39021136	-2.84205782883191	0.0077853579802014
chr5:43675511|43677806	-1.53390511017339	0.0460532328044007
chr5:50274988|50411383	-2.29972350965745	0.0138437636808341
chr5:50750151|50763242	-2.45709150681695	0.00753138349161753
chr5:58988493|58993465	-2.06110641261567	0.0412418554472006
chr5:65567513|65572286	-2.78219513987086	0.000384596143658489
chr5:65680494|65685472	-3.92663961157585	0.00214382104630422
chr5:66012049|66014725	-2.54017160579096	0.00357822209075005
chr5:74715510|74716673	-2.50071932466914	0.0203916820553954
chr5:77046347|77048272	-2.04846495262376	0.0425863392787658
chr5:79656958|79669028	-2.5905858117253	0.0160790027226645
chr5:80146090|80147284	-3.69897879739938	0.000135616023165298
chr5:83537007|83555038	4.10848003057894	0.0393128723630826
chr6:100766565|100767345	-2.96548724895536	0.0200246372527482
chr6:106583328|106602922	-3.03338534562192	0.0341467501720822
chr6:109475399|109476930	-3.7209330652337	0.00569043202723083
chr6:116692055|116726622	-2.48512546957575	0.0461739388919973
chr6:116698704|116705160	-1.82628910758257	0.0132443341555163
chr6:118448404|118449870	-2.20620149556527	0.0119549960747236
chr6:127812883|127813931	-3.15064210057538	0.0113270839613935
chr6:13579451|13584225	-1.79278521325181	0.0155977485318677
chr6:144537582|144539443	-1.84228284703016	0.012926979850736
chr6:147205971|147239270	-1.92955916001946	0.0416009233583697
chr6:20546346|20548705	-2.27360770934646	0.0311545313953375
chr6:3085259|3104315	-2.72130183218861	0.0416337198357999
chr6:32519370|32580856	5.82536112339458	0.000748457231676544
chr6:32661967|32757883	4.88219575519869	0.00881521646933831
chr6:35312302|35312772	-1.66394598894772	0.037576827775057
chr6:35619096|35642843	-2.61489467245515	0.0478810483034184
chr6:43055545|43056445	-2.6312351429043	0.0157976736305798
chr6:57050774|57055797	-2.36841478229453	0.014824954548597
chr6:7303550|7310029	-3.18843905086548	0.000509778290838768
chr6:75647731|75659407	-3.48807376708049	0.00120780124373936
chr6:75702645|75703072	-2.39933184764859	0.00221197200388696
chr6:79060478|79060818	-3.29681026257212	0.000789669858428588
chr6:82214227|82214829	-1.82713434466165	0.0224284831382018
chr6:83398367|83407901	-2.85101346268788	0.0425359675610007
chr6:87215903|87233527	-2.47574530448775	0.045282616990744
chr6:89751431|89753622	-2.37168590349556	0.0158447252283484
chr6:90206569|90271941	-2.68622302140443	0.00663119941011989
chr6:90249689|90271941	-3.71573128318037	0.000109838428749107
chr7:100023419|100024307	-1.65133187724093	0.0213618923550421
chr7:102227367|102227669	-2.2680877752213	0.0107084537633771
chr7:103025063|103029418	-3.2788153217709	0.00843957078123849
chr7:105090009|105091314	-3.33760881069822	0.00536617934292675
chr7:114942275|114979781	-3.55358628092691	0.00873294846366133
chr7:12224226|12229819	-2.21042990335856	0.0229446967073468
chr7:128579999|128592017	-2.60810837385231	0.031810600474663
chr7:136020701|136031033	-2.3029445743106	0.0103228933120968
chr7:141636960|141649333	4.13122206986388	0.0367669031644837
chr7:150233035|150235253	4.38288939744702	0.0243508997928078
chr7:155672867|155680908	-1.54395896250893	0.0327450807177191
chr7:17890363|17897446	-2.18392163367165	0.0472682414755714
chr7:18666213|18666476	2.99325656085814	0.0198446077886021
chr7:22976210|22984045	-3.21160226498341	0.0079573331663123
chr7:24623666|24668660	-2.15614964487695	0.0186589040242317
chr7:27629371|27649633	-1.63371179417614	0.0393780352564661
chr7:27785163|27785489	-1.93481131014094	0.0131669445378234
chr7:39987599|39988258	4.16248263960558	0.0363584286266931
chr7:43639449|43640649	-2.65964981871397	0.00962135491468805
chr7:44645327|44647759	4.29306375140915	0.0281389734586923
chr7:50319048|50327757	-2.45954646438607	0.000990691004623765
chr7:5641154|5652510	2.25789205616337	0.0449244892792651
chr7:64336259|64336982	-2.90673971781689	0.00712177553123095
chr7:66991137|66994341	-1.99088311956183	0.0315636786660578
chr7:6814764|6822364	-3.17601597762575	0.00252137860288453
chr7:6814764|6823360	4.39780915538122	0.0227372533208923
chr7:72831602|72831798	-3.19476866837815	0.0106654897403354
chr7:92294889|92307656	-2.01977629281376	0.0156507870428607
chr7:99390893|99391253	-3.32663173187219	0.00848380536300308
chr8:100709133|100713181	4.52927397257361	0.0184429268883461
chr8:103430612|103435790	-2.80861045046381	0.0346534323202256
chr8:105419144|105444381	4.56561954453922	0.0163272902837354
chr8:131940499|131946633	-2.09302877589605	0.0134607921407086
chr8:132722040|132757294	-1.90626186844013	0.0337567302164757
chr8:134812610|134813169	-1.90399853928907	0.0481493542673448
chr8:2492872|2494091	4.09076339070377	0.0419195158779852
chr8:37765526|37766355	-1.87635429532568	0.00946242029883016
chr8:38788704|38820635	-2.47597062049087	0.0455496287075484
chr8:42325970|42329214	-1.71550945429439	0.0301439127218966
chr8:47394978|47407961	-2.75543002070755	0.0156935751763751
chr8:51860845|51861246	-1.89683905821674	0.0112520535763173
chr8:51860861|51861246	-3.1013837490705	0.00441842784761832
chr8:66572482|66573506	-1.85792189338819	0.0352028391271347
chr8:66601698|66602523	-1.84519444652873	0.0474110281444686
chr8:668598|674047	-3.45685888996771	0.000354914820196779
chr8:67118248|67137603	-2.51921397066417	0.00558313884208811
chr8:70159505|70162854	-1.82469219160417	0.0176569564872036
chr8:72052539|72076627	4.95249582130721	0.00700715598820168
chr8:80499494|80500382	-3.22121851826846	0.00317196394468881
chr8:8933853|8935790	-3.68841231417991	0.002906318646
chr8:98706467|98707311	-2.76365840368371	0.00213466967019213
chr9:106972005|106984409	4.25287837007482	0.0302137422665899
chr9:109050283|109064567	-3.47494603139267	0.009965849971193
chr9:109106508|109108570	-2.36110244982826	0.00204157949323792
chr9:110972073|110973558	-2.41083771362113	0.0148667674516206
chr9:121171159|121171548	-2.39113764919589	0.0130535715242254
chr9:123757703|123769563	-3.51786088701948	0.00180430109251074
chr9:125657651|125672643	-1.77096245370846	0.0472029039790095
chr9:131506114|131506453	-2.36625360853121	0.00142507848447833
chr9:135881633|135883078	-1.73453495744639	0.0160056462161796
chr9:137811461|137818138	-2.500982860147	0.0313326029258081
chr9:20413721|20414425	-2.39808779403428	0.0495918676175608
chr9:31119792|31128558	4.60031528902485	0.0159225464836314
chr9:31180095|31235419	4.4083748425854	0.0229827002294057
chr9:31230549|31235419	4.66555101023794	0.013685250445993
chr9:31233747|31235419	5.88578529413939	0.000791769078331586
chr9:37126312|37147445	-2.07637777125203	0.00621120061488771
chr9:4860125|4860901	4.24731359255781	0.0304040877587167
chr9:5968019|5988545	-1.79542837464895	0.0376264375871092
chr9:71740063|71740232	-2.36416544292638	0.0135038407430751
chr9:74816669|74816964	4.01492854219535	0.0452086522757794
chr9:75016268|75017448	-2.57459467012885	0.00429489560649102
chr9:77214329|77227485	5.00389882071629	0.00592844426917259
chr9:77381976|77407607	4.70359353422004	0.0118521378121154
chr9:77794463|77797648	-1.7729180896166	0.0345810143399747
chr9:83661777|83669327	-2.70640590129727	0.00565086206094054
chr9:83678441|83683066	-2.96111213372227	0.0143705426930827
chr9:83678441|83686155	-1.65028561816793	0.0426475433675245
chr9:83679775|83686155	-2.11877529526669	0.0101145283625408
chr9:83682951|83686155	-1.64212078935338	0.0268615538443532
chr9:96458379|96458541	-1.96981318355752	0.0169409519640805
chr9:96458379|96471094	-3.08631147747597	0.00950988519019494
chr9:96522506|96565483	4.03252729893373	0.0429073258337073
chr9:97994631|97998678	4.02834593434056	0.0421384936806116
chrX:101041317|101042312	-1.77842996318246	0.0245205400027729
chrX:118542725|118546116	-1.78935207381796	0.0260774920838245
chrX:1285778|1290509	-1.81827635017864	0.0360215319024137
chrX:132281095|132283032	5.66048939400051	0.000968406540887322
chrX:150592605|150619139	-2.05390102518348	0.0362718152859739
chrX:150736595|150737448	-2.40298776524639	0.0252502310577058
chrX:1593444|1595532	-4.44273874195583	4.79918351775349e-07
chrX:24172715|24179770	-1.98503616245529	0.0331607098192099
chrX:51327721|51357027	-2.16167940649576	0.00374702291387296
chrX:65051462|65107023	4.26483925961552	0.0304918388680722
chrX:65075474|65075912	-2.84103773670171	0.00307628819322531
chrX:85303406|85308216	4.92880753160257	0.00728985648734766
chrY:12912963|12914649	-3.1537929871418	0.014595617678449
chrY:2953909|2961646	-2.28251943323907	0.00272820282509435
chr1:103565435|103575540.1	-3.48925870370251	0.00194648805358505
chr1:108148279|108161293.1	-2.37533860863329	0.0106821683683138
chr1:110891392|110892533.1	-2.04050493960296	0.00926328332930575
chr1:111147642|111161296.1	-1.80771437986485	0.0479165863255882
chr1:11121246|11122126	-3.31941201572322	0.0231871650683511
chr1:112653598|112667145.1	-2.50180068401386	0.0317256360220717
chr1:150440923|150446401.1	-2.7186655764492	0.0165177317910667
chr1:151117392|151118139.1	-3.30562757069021	0.0175444508958838
chr1:151166934|151167414.1	-2.27374745597291	0.0022140513786141
chr1:151172268|151173615	-4.51750221317135	0.00165573574921577
chr1:151242123|151242567	-3.24976308205143	0.0249939964699913
chr1:153667555|153668557	-3.8798071510219	0.0078360488988796
chr1:154234591|154235291.1	-2.42152273576575	0.0247795519150479
chr1:155349327|155349596	-3.38513555863338	0.0216357283333476
chr1:155378281|155380116	-3.80130603254628	0.00871357569502095
chr1:155674685|155675096	-3.95831097520513	0.00702355518855037
chr1:155675010|155679512.1	-2.7029834699034	0.00145712764750486
chr1:155675010|155680456.1	-2.81625499228113	0.0253594490930925
chr1:155676548|155679512.1	-2.30959839967011	0.00229226472859964
chr1:155725382|155726019.1	-1.72530322606318	0.0234149254269413
chr1:155853276|155853806.1	-1.42930049633259	0.0452212695898021
chr1:15638307|15643650.1	-2.13009172577408	0.023617662456726
chr1:160323431|160332557.1	4.51990970950675	0.0182119191808814
chr1:1669664|1734835	-5.74024955270911	6.2570080903379e-06
chr1:175986943|175989479.1	-3.16493591888588	0.00929770591149014
chr1:176116624|176136547.1	-2.95837575307782	0.020782181836921
chr1:176149006|176176007	-3.80130603254628	0.00871357569502095
chr1:179347600|179350431.1	-2.41665251369301	0.0493588478744068
chr1:180062220|180065272	-4.77754855558884	0.000711570026528109
chr1:180078463|180080661	-3.38513555863338	0.0216357283333476
chr1:186318447|186318828.1	-2.47939929754139	0.0357354397000653
chr1:193135391|193138173	-3.43569979090966	0.0204987641558147
chr1:194159280|194167715	-4.3466019683334	0.000689816239745638
chr1:197583152|197611976.1	-3.08362358691136	0.0230720091091801
chr1:197642711|197658369.1	-2.42952159230906	0.00536966593610648
chr1:197652235|197715074	-3.34217980481714	0.0226875825906293
chr1:202150311|202152699	-3.24976308205143	0.0249939964699913
chr1:202157739|202158301	-4.57854411008357	0.00145043233082189
chr1:205616478|205623891.1	-1.41217776242809	0.0495189061597198
chr1:212342188|212347406	-3.29229135416694	0.0238853915181877
chr1:22078429|22091501.1	-2.91878278767624	0.0115322338753405
chr1:223954477|223962273.1	-2.43026128875402	0.0474597867244362
chr1:23030469|23050520.1	-1.82990040365728	0.0134333787716672
chr1:231537213|231542611.1	-1.74215224106065	0.0363665760252652
chr1:231795242|231818517.1	-2.10255305555435	0.00909203480651295
chr1:233090061|233095863.1	-2.71849468887933	0.0079259505178542
chr1:233135013|233161363	-3.29229135416694	0.0238853915181877
chr1:233198939|233208689	-4.63681831596313	0.00126884994477323
chr1:233217899|233227371.1	-2.56250905312502	0.00494118163483112
chr1:233227226|233236980	-3.76565382767454	0.00914676424472611
chr1:235773842|235787373	-3.80130603254628	0.00871357569502095
chr1:23814190|23820593.1	-2.72382963026167	0.00986550820842706
chr1:24169417|24180854	-3.32719256344876	0.0229952434822799
chr1:243695591|243843282.1	-2.05492615463016	0.0478272412487451
chr1:244843135|244848856.1	-2.4916743050193	0.0443123465405344
chr1:245002121|245059458	-4.25190381165361	0.00338115132211466
chr1:246437148|246440124	-3.24976308205143	0.0249939964699913
chr1:247157000|247159813.1	-3.34275839713656	0.00296644154710626
chr1:25242374|25243633.1	-3.10275199057994	0.00364095258582766
chr1:26446316|26447660.1	-1.86506639615545	0.0183841429908139
chr1:26453609|26463433	-4.760356362852	0.000750602604786646
chr1:28473554|28480604	-3.34217980481714	0.0226875825906293
chr1:29035826|29053312	-3.2845376028535	0.0240812885704243
chr1:29154696|29154910.1	-3.27938930606849	0.000437526218089965
chr1:31915895|31919658.1	-2.88199686985985	0.000197159560627766
chr1:32279671|32280210.1	-1.97766780501414	0.00834332420598843
chr1:32631827|32634792.1	-1.58659552100737	0.0480968108787978
chr1:35831427|35835993	-3.90225277024803	0.00758722660559454
chr1:35966955|35973511	-3.24976308205143	0.0249939964699913
chr1:40189055|40202614.1	4.14368640880996	0.0355616291932976
chr1:41070595|41075451.1	-1.69479765793197	0.0197556885311479
chr1:51827796|51834170.1	-1.72581620329205	0.0397413856355742
chr1:52477708|52489035	-3.32719256344876	0.0229952434822799
chr1:52493611|52509712.1	-1.91947672524445	0.0128617016341673
chr1:58506060|58534331.1	-2.03940372276049	0.0372812156864184
chr1:58506060|58536741.1	-2.01969765750065	0.00928011095635985
chr1:58527261|58536741.1	-2.46267683733416	0.0460101253738856
chr1:66891154|66905375.1	-2.10779626421464	0.00595719971312644
chr1:67326735|67338703.1	4.15876650712427	0.0366093728525066
chr1:805799|810170.1	-1.73823301949792	0.0187390353985535
chr1:8614561|8656441	-3.34217980481714	0.0226875825906293
chr1:92333391|92380873.1	-1.47215781514599	0.045185996333455
chr1:92605307|92636336	-2.95454931684257	0.0451065012188231
chr1:97515726|97549744.1	-1.97952966427133	0.0280522162924566
chr10:100260218|100262063.1	-2.09743380901495	0.0286569348406418
chr10:101939863|101957732.1	-1.86261015422827	0.0390709881303282
chr10:101975212|101995355	-3.29229135416694	0.0238853915181877
chr10:103622470|103661114	-3.43569979090966	0.0204987641558147
chr10:110124017|110126503	-3.95831097520513	0.00702355518855037
chr10:110124017|110130486.1	-3.33429813369365	0.00101309789816648
chr10:114970368|114974385.1	-2.06406786525844	0.0178115361470763
chr10:11997672|12014184.1	-2.10227462791469	0.00693821583678464
chr10:124681607|124696212.1	4.30239839006089	0.0275675710256852
chr10:124706636|124706887.1	-3.54313728064361	0.00131135219440772
chr10:130079566|130079901	-3.31941201572322	0.0231871650683511
chr10:130166507|130171636.1	-3.07812783090682	0.0110829867123479
chr10:131308211|131309299.1	4.70367606058371	0.0124345609183105
chr10:14520977|14530515	-3.37729385129918	0.0218216252431408
chr10:15833630|15847943.1	-1.58491181897552	0.0336289307047394
chr10:16752539|16782084.1	2.01390427122711	0.0336070469415103
chr10:18609845|18616293	-2.91823172845095	0.0472234790987748
chr10:21904522|21920963	-2.91823172845095	0.0472234790987748
chr10:26500819|26513660.1	-2.14927082685592	0.049490823621903
chr10:27117576|27121448.1	4.12447872513684	0.038254302325091
chr10:27142387|27145590.1	-2.06545359256839	0.0065977295285865
chr10:27180953|27181581	-3.76565382767454	0.00914676424472611
chr10:32034690|32037607.1	-2.98472175954208	0.0365699163017232
chr10:32565558|32584304.1	-1.51945787872356	0.0345387568645453
chr10:45457785|45464327	-3.24976308205143	0.0249939964699913
chr10:4830675|4847299	-3.86593352938205	0.00796392863418829
chr10:4830675|4909606.1	-3.57593872807108	0.00798354098313853
chr10:48401612|48410168.1	-1.86645916906386	0.0190618531297168
chr10:5785142|5800705.1	2.65095325052292	0.0464539014110812
chr10:60084602|60085253.1	-3.36496673419734	0.00443899300368944
chr10:6213623|6226365	-4.78949522235313	0.000692899946809884
chr10:62388396|62399793.1	2.62074707594913	0.0489161698570695
chr10:68747161|68747566.1	-2.96443170226569	0.0274449286015494
chr10:68959806|68960249.1	-2.30367794206467	0.0096840066009964
chr10:7276892|7285954.1	-1.74215624650369	0.0160298613475143
chr10:7797047|7802854.1	-2.00552733440169	0.00552045253298868
chr10:84417771|84425893.1	-1.81321241531781	0.0124770537740697
chr10:84438282|84477664.1	-3.38617533206254	0.0150477307332243
chr10:84438512|84477664.1	-1.62110488027393	0.031603058739104
chr10:863743|885760.1	-2.74916754523232	0.0376019447127993
chr10:87767673|87776427.1	-2.12849714386294	0.0296458912152819
chr10:88893871|88905660.1	-2.10580395638651	0.0431328176301963
chr10:88901656|88922436	-4.26321005655644	0.00332011669940112
chr10:92474841|92475994	-3.92279163788461	0.00739443706266876
chr10:93381219|93389154.1	4.27725687561974	0.030236836302221
chr10:93676653|93687449.1	-2.81689128712049	0.0183729561461826
chr10:97436417|97437750.1	-1.80029978137658	0.0128378076844104
chr11:108176246|108177090.1	-1.87215152256408	0.00951780850364196
chr11:108227595|108229323.1	-2.5464203745665	0.000644147780910419
chr11:108235670|108245026.1	-3.08107366756295	0.00247853230023535
chr11:108258986|108267342.1	-2.88994898355904	0.00717486036012157
chr11:108267171|108267342.1	-2.08236151754867	0.00394156992308048
chr11:108299714|108304852.1	-2.99875364528629	0.0200348767528703
chr11:110136663|110137414.1	4.79432215130901	0.00975218242908393
chr11:118581246|118584644.1	-2.53929657526877	0.0256659882041142
chr11:119273868|119274953.1	-2.1196768886672	0.0286404317998106
chr11:128768118|128772985.1	-3.47239915634306	0.000712645665718735
chr11:14771937|14789242.1	-1.84428158295924	0.0110899314298794
chr11:14771937|14819209	-2.9051159782953	0.0480337938101016
chr11:2768844|2778037.1	-3.57017961830874	0.00491295853948172
chr11:34071726|34076642.1	-2.40085021760069	0.0294209093927159
chr11:34089395|34092056.1	-2.95571912454601	0.0155584651300387
chr11:34957384|34978182.1	-2.10511374638239	0.0214091544032203
chr11:47627080|47635571	-3.24976308205143	0.0249939964699913
chr11:61437625|61438113.1	-1.98663809720243	0.0190076663774299
chr11:66639700|66640123.1	-2.22829241386831	0.00289407121158258
chr11:68567014|68576043.1	-1.90545737505982	0.0253899099134585
chr11:68567014|68583129	-3.29229135416694	0.0238853915181877
chr11:68567014|68596218	-3.38513555863338	0.0216357283333476
chr11:68601863|68603492	-3.38278425681619	0.0193930087574201
chr11:68760225|68761687.1	-3.18120041795708	0.0265359296777169
chr11:73707420|73718890.1	-2.34048800291922	0.0134918346157318
chr11:77683710|77693611.1	-1.41349760529776	0.049562728062254
chr11:78101093|78109581	-3.24976308205143	0.0249939964699913
chr11:85996826|86003451.1	-2.04999569292657	0.00804515427681556
chr11:85996826|86007583	-3.83036556085059	0.00836979942142113
chr11:9203660|9207632	-2.92547701424865	0.0468989962702896
chr11:95812932|95813589.1	-2.24666837228614	0.0220237907073279
chr12:105111125|105127289	-3.33498010729747	0.022804172283749
chr12:110018345|110029635	-4.33804965433928	0.00294920047175305
chr12:110395101|110396452	-4.27747382663315	0.00326412282591975
chr12:111509549|111510582.1	-1.84927745568826	0.0397573251192949
chr12:111865250|111871180	-3.29229135416694	0.0238853915181877
chr12:112178931|112179397	-4.56047805382991	0.0015011989586305
chr12:112502144|112506422.1	4.30160629534034	0.0291307089371612
chr12:116230533|116237705.1	-1.47009571525543	0.039908925628724
chr12:11869424|11869969.1	4.10220615213679	0.0396714613366997
chr12:120557282|120557682.1	-2.52560192826295	0.00118174015663871
chr12:120782655|120784593.1	-2.42726097815249	0.0011260559482822
chr12:121402742|121417911	-3.34217980481714	0.0226875825906293
chr12:121780872|121781192.1	-1.65527712704881	0.0267892932484006
chr12:122340753|122341697.1	-2.28518543955272	0.00587261731475895
chr12:12244262|12244655.1	-2.80767017038124	0.0456323984496993
chr12:122511109|122515227.1	-2.60256525958956	0.00834651195492542
chr12:124419957|124437996.1	4.34057606469997	0.0260189179104244
chr12:124419957|124449867	-3.24976308205143	0.0249939964699913
chr12:128808788|128815070.1	-2.83670246963528	0.0312443568288031
chr12:1289852|1290012.1	-2.44765316759077	0.0482302053751333
chr12:133191489|133192003	-4.88128213750559	0.000530936985575174
chr12:24832723|24836596	-3.76565382767454	0.00914676424472611
chr12:2820086|2821792.1	-2.27118596916189	0.00578577236506592
chr12:2873977|2874525	-3.43569979090966	0.0204987641558147
chr12:32607957|32611283.1	4.37881112323099	0.0240286882891167
chr12:350621|354234.1	-2.70385542663818	0.0427744062750345
chr12:40028301|40092933	-3.24976308205143	0.0249939964699913
chr12:42210355|42210619.1	-2.73319340551307	0.0110551449851931
chr12:42210355|42210680.1	-1.73585292192143	0.0185688014201199
chr12:42210355|42212484.1	-2.68948376202744	0.0170906425700718
chr12:45860801|45893721	-2.9051159782953	0.0480337938101016
chr12:45945249|45964188.1	-3.05462399129137	0.0325986524283278
chr12:46229153|46243314.1	-2.00747411569984	0.00860053919145596
chr12:46239679|46243314.1	-2.44166740637651	0.000893402166973204
chr12:47104113|47108164.1	-2.2799366367788	0.00193477584911342
chr12:50780140|50809589.1	-2.86019603345647	0.0259483068609417
chr12:51055835|51056502.1	-2.798565037817	0.00855043446687801
chr12:57395749|57398198.1	-2.09061749914766	0.0208448194171168
chr12:62484170|62501698	-3.83692350100576	0.00829542388528145
chr12:69589485|69593613	-4.0697081597035	0.00211784086392453
chr12:69800209|69801721.1	-1.81954439486051	0.0113224287055757
chr12:71642436|71644318	-3.8798071510219	0.0078360488988796
chr12:71769800|71774022.1	-2.90533904774543	0.0212409687674184
chr12:76450851|76487618	-3.76565382767454	0.00914676424472611
chr12:76487510|76537986.1	-2.69670061366737	0.0144669796718633
chr12:79820774|79822190	-2.93413784468381	0.0462132217540775
chr12:8039819|8040165	-3.95831097520513	0.00702355518855037
chr12:94169153|94186473.1	-2.13747775334506	0.0157596608969526
chr12:9680923|9694969.1	-2.11598985474653	0.0115265723459398
chr13:108243532|108251316.1	-2.46107986699864	0.0359686083913019
chr13:113520616|113539507	-3.8798071510219	0.0078360488988796
chr13:114147992|114148962.1	4.54167792253628	0.0176103079767101
chr13:21387508|21391854	-4.51252432016892	0.00167406778853911
chr13:21400373|21421164.1	-2.79101792006781	0.0469170495876975
chr13:27427092|27430621.1	-2.52784644923182	0.0155248611675354
chr13:40826506|40855815.1	-2.41338680243575	0.0205663083964633
chr13:40836597|40855815.1	-3.31372673673206	0.00499489506913814
chr13:40942952|40943925.1	-3.40818025857224	0.00130358764407046
chr13:41466823|41468838.1	-3.51885892290504	0.0112190818166022
chr13:42926336|42970670.1	4.45528500294142	0.0208588686706868
chr13:45336536|45337388.1	-3.48811987674219	0.0116927360147916
chr13:45516143|45530780.1	-2.6033613191634	0.00929699902412866
chr13:49451553|49451909.1	-1.74419689268652	0.0180982444932353
chr13:49506635|49513166	-3.31941201572322	0.0231871650683511
chr13:50927407|50949505.1	-1.64398875097171	0.0220350591439852
chr13:52658399|52680155	-3.2845376028535	0.0240812885704243
chr13:72893784|72931267	-3.29229135416694	0.0238853915181877
chr13:77719532|77753358.1	-3.11912136276056	0.000306561418354976
chr13:99238427|99244624.1	-1.60921992839474	0.027558100366613
chr13:99243832|99244624.1	-2.30991897160192	0.0474095977699748
chr14:102040236|102040673.1	-2.00570411942672	0.00561594982972541
chr14:20395450|20395949.1	-3.05921356008047	0.0183714938780351
chr14:22909483|22911403.1	-1.96397054515783	0.00848639433873631
chr14:24209890|24211829.1	-3.14971505161929	0.0154785777113234
chr14:30580864|30581116	-4.3697425373534	0.00280294791090354
chr14:32090502|32094386.1	-1.68715250135884	0.0255228895455096
chr14:32090502|32117287	-4.89899332436499	3.01702954765855e-05
chr14:34575756|34609742.1	4.20613642267461	0.0326451967222858
chr14:34792775|34862322	-3.31941201572322	0.0231871650683511
chr14:34862044|34862322.1	-2.20481079753145	0.00297712868907911
chr14:35096558|35099384.1	-2.71007756720511	0.0324326702776882
chr14:35126735|35127611.1	-2.32401606031542	0.0169038430291124
chr14:35126735|35180777.1	-2.69142269963695	0.0287588530993858
chr14:45118028|45130790.1	-1.81362111622641	0.0116350576434285
chr14:49663315|49674427.1	4.08157651210689	0.0398349036911574
chr14:50199691|50204409	-3.80130603254628	0.00871357569502095
chr14:52511240|52544371.1	-2.31045024988795	0.0174742997817992
chr14:58318542|58330169.1	-2.49521409658576	0.0154299771339335
chr14:59263441|59291306.1	4.49342345253162	0.0185821422760447
chr14:60149353|60153178.1	-2.40382160630618	0.0373748627704591
chr14:61529075|61530595	-4.26321005655644	0.00332011669940112
chr14:61721509|61721823.1	-2.60049222934362	0.00445425593355635
chr14:65561337|65629606.1	4.66763483164871	0.0134259316759116
chr14:67685015|67690421.1	5.21870797524151	0.00339471002028547
chr14:71400794|71418196.1	-2.41233724599285	0.00946412765333476
chr14:71413948|71418196.1	-2.52775781405546	0.000880650900530547
chr14:71413948|71467247.1	-3.49869246179235	0.00941735391065139
chr14:71413948|71529370.1	-2.67118107337419	0.00361655190855593
chr14:73147795|73149550	-3.84416878680346	0.00823786205663675
chr14:75100992|75103997	-4.20218541250806	0.00366679089939566
chr14:75109685|75110371.1	-1.80550675781439	0.0149401498997627
chr14:76166663|76180849.1	-2.26978756999483	0.0262046257159902
chr14:77464598|77465667	-4.57854411008357	0.00145043233082189
chr14:85978970|86070967.1	-2.93268676647613	0.0291062338236831
chr14:88726541|88754671	-3.29229135416694	0.0238853915181877
chr14:91338005|91343657.1	-2.22720519759551	0.0412979084440209
chr14:91342380|91343657.1	-1.95892078782031	0.0170180281072613
chr14:91481576|91485730	-2.91823172845095	0.0472234790987748
chr14:91792367|91802421	-2.88261425999147	0.0494880684243975
chr14:91797785|91802421.1	-1.88147826917576	0.0484714308605241
chr14:99231345|99257836.1	-3.69237031908005	0.00145801468923603
chr14:99231345|99257839.1	-2.40519154309417	0.00875580528446954
chr14:99257471|99257836.1	-2.17379405395351	0.00321643642993236
chr14:99257471|99257839.1	-2.21258327763868	0.00684013348634544
chr14:99458279|99465813.1	-1.99990030890072	0.00777101820370361
chr15:100330889|100334180.1	-4.10312941756774	6.43308982718627e-05
chr15:100564692|100566453.1	-3.03209120431652	0.0255513182412874
chr15:25354353|25360527.1	-3.33720662449493	0.0109143118452851
chr15:25405461|25426219	-3.83036556085059	0.00836979942142113
chr15:38502312|38505920.1	-3.03212392463329	0.000402163757924253
chr15:41668828|41713496	-3.38513555863338	0.0216357283333476
chr15:42827928|42840433.1	-1.90334376295811	0.0385513149941332
chr15:42950262|42966286.1	-3.25846657135122	0.00920060108915696
chr15:44331988|44338317.1	-1.6575751035021	0.0267671905787845
chr15:44484224|44490999.1	-2.80719374554065	0.0265310354995678
chr15:49027365|49037769	-3.90225277024803	0.00758722660559454
chr15:51781044|51782828.1	-2.43128591858467	0.0246521264456829
chr15:56689041|56693215	-3.24976308205143	0.0249939964699913
chr15:59030804|59031702.1	-2.14570915636152	0.0348224679288556
chr15:60442416|60445791.1	-1.78583419925088	0.0190107652980897
chr15:64204441|64204949.1	-2.7700761756806	0.0378526334174951
chr15:64499293|64500166.1	-1.76797439238605	0.0171044973295678
chr15:68141946|68146700.1	-2.87496559284866	0.00134349646521259
chr15:68175637|68176654.1	-2.67786273347264	0.0187021042807808
chr15:76287846|76292700.1	4.69272206650924	0.0123464725459736
chr15:78160092|78162367	-3.2845376028535	0.0240812885704243
chr15:84680713|84691644.1	-2.46544192045463	0.00373577802879382
chr15:84687625|84691644.1	-2.59410586176265	0.00550438902521391
chr15:85113873|85121014.1	-4.08161197133065	0.00138252422797903
chr15:90439332|90443478.1	-1.73580605191853	0.0183752831280176
chr15:90486954|90487582	-4.490747421114	0.00175824686792409
chr15:92996957|93002317.1	-2.32879773607503	0.013624097180173
chr15:98707562|98708107	-4.81474565303893	0.000638421318193354
chr15:99598430|99633173.1	-3.28039646029938	0.00845219010433341
chr16:10419581|10473989.1	-2.42577083321929	0.0191561193345398
chr16:14552021|14555709	-3.90225277024803	0.00758722660559454
chr16:21612645|21625115.1	-2.41261877429524	0.0388702495869314
chr16:27213585|27215008.1	-3.31785663069361	0.000259716658270255
chr16:30483827|30484263.1	-1.71600735539614	0.0183730283826827
chr16:30713208|30713711.1	-2.72911731180572	0.0403856777487278
chr16:30728966|30729572.1	-3.03866902312198	0.000202505990565809
chr16:31090775|31091342.1	-2.29556224804525	0.00234930092612903
chr16:4505484|4507012	-3.33498010729747	0.022804172283749
chr16:47463899|47515601	-3.35274825417883	0.0204423907815786
chr16:47497399|47515601.1	2.79816129189983	0.00917582625588141
chr16:53154447|53157541	-3.90179997586523	0.00411558409514859
chr16:53439016|53447106.1	-3.10828998062291	0.003487450166478
chr16:58559804|58560362.1	-1.8137784119277	0.0127188477166134
chr16:66805777|66806026.1	-2.7513882809266	0.00977998232707717
chr16:69370483|69372355.1	-1.50957382005638	0.0423029773318127
chr16:70010751|70018097	-3.33498010729747	0.022804172283749
chr16:71745144|71745614.1	-3.06669716048996	0.0323753665170707
chr16:78424870|78432752	-3.33498010729747	0.022804172283749
chr16:8920359|8930397.1	-2.3854056837712	0.00463159361244808
chr16:89895990|89900794	-3.34217980481714	0.0226875825906293
chr17:12054889|12113360.1	-2.17618832983096	0.0321384423859348
chr17:12081356|12095694.1	-2.38481779363133	0.00531689086100676
chr17:18306891|18308941	-3.2845376028535	0.0240812885704243
chr17:18865469|18865952.1	-1.93993569656633	0.0353134206955697
chr17:28163543|28172618.1	3.02029565468708	0.0173315110417225
chr17:28921688|28924302	-3.90880869295066	0.00751790540801509
chr17:29451455|29451680.1	-2.13379946666901	0.0480089218198377
chr17:29676820|29677741.1	-3.07381857076606	0.0320917537712992
chr17:30803901|30804108.1	-3.35850060024286	0.0024714244303154
chr17:32030656|32031458.1	4.2997832991686	0.0276521974885578
chr17:37440505|37440662	-3.86593352938205	0.00796392863418829
chr17:39709813|39715939.1	4.16660887804585	0.0354968049751407
chr17:4066447|4072756.1	-2.08671648685847	0.040054227861071
chr17:42727635|42730918.1	-2.49213704909829	0.0418016713820737
chr17:47618350|47619164.1	-2.78256700074032	0.00390703459938457
chr17:48396680|48412537.1	-2.86807059932059	0.0326719206567347
chr17:49311312|49312042.1	-2.4074544831226	0.00100951138633878
chr17:49311312|49312845.1	-1.78294802931886	0.0337980397071126
chr17:5308694|5346925	-3.38513555863338	0.0216357283333476
chr17:5365122|5368468.1	-2.7642316535137	0.0212327866531373
chr17:55401469|55403868.1	-3.03074438781343	0.00634960964578092
chr17:56844019|56848065.1	-2.13978413648054	0.0497472284153298
chr17:59731421|59738947.1	-2.35719499327889	0.00184936847714558
chr17:59764971|59773885.1	-1.84973966963563	0.0443795771125158
chr17:59808796|59817773	-3.33498010729747	0.022804172283749
chr17:64519321|64526200.1	-2.98258151198278	0.0370181774878124
chr17:65053502|65053728	-3.37729385129918	0.0218216252431408
chr17:67891844|67894165.1	4.60693356249211	0.0154228199430344
chr17:68209654|68210465.1	-1.96109866587846	0.0412070524799272
chr17:69273959|69284072.1	-3.06669716048996	0.0323753665170707
chr17:75042181|75042659.1	-2.63105948718469	0.0105886042978259
chr17:75242336|75243570.1	-2.52877466615752	0.00142749420755868
chr17:76767386|76769871	-3.41960079516426	0.0182004302365322
chr17:77402059|77402703.1	-2.73853975959239	0.00629029310121019
chr17:78004170|78031842.1	-1.71479401874901	0.0375979713543573
chr17:78400735|78401057.1	-3.18108991271504	0.00357027666186482
chr17:79077430|79077864.1	-2.36193750091125	0.0150824608098
chr17:80289659|80290728.1	-2.74587110138829	0.0409251658452586
chr17:82756165|82772507	-3.9517590294073	0.00708955431801041
chr17:9969677|10019897	-3.33498010729747	0.022804172283749
chr18:13067831|13073185	-3.31941201572322	0.0231871650683511
chr18:196637|204692	-4.59268105580148	0.000178365620673769
chr18:21020151|21044186	-3.32719256344876	0.0229952434822799
chr18:21656861|21664230	-3.2845376028535	0.0240812885704243
chr18:23507985|23509279.1	-2.98534634285698	0.0104885892783858
chr18:2666157|2674145.1	-2.31264360850492	0.0359392183169913
chr18:2724899|2752552.1	-2.97500803911191	0.019633820988895
chr18:54271360|54277853.1	-3.12076717715292	0.0295915784065326
chr18:58709378|58735329.1	4.11441430964122	0.0392181778605388
chr18:76441245|76443211	-3.08259846095195	0.0380347956305939
chr18:76849526|76851939.1	-1.5551412963286	0.0331840193861588
chr18:79695225|79704917.1	-2.46500564495666	0.000982534712139613
chr18:9182382|9211784.1	-2.90034746023085	0.0229126096206755
chr19:1032392|1032696.1	-1.64613194487694	0.0240640269273822
chr19:11058255|11060187	-3.76565382767454	0.00914676424472611
chr19:14042453|14042789.1	-1.80934115475672	0.0387242936529883
chr19:14458031|14458375.1	-2.12287361767122	0.0372725619535075
chr19:17276495|17276909.1	-1.56678750142773	0.0341061315837869
chr19:18075749|18076327	-3.24976308205143	0.0249939964699913
chr19:18175040|18175697.1	-1.70108990784685	0.0463422906369722
chr19:18342859|18343415.1	-2.37328564475118	0.0199652438481408
chr19:18537601|18538436.1	-1.81552875217858	0.0263737384800416
chr19:18539371|18539720.1	-1.66944090802177	0.0238767141512815
chr19:19104913|19106385	-3.33498010729747	0.022804172283749
chr19:19296989|19297344.1	-2.29659577377293	0.0442881797021574
chr19:19492306|19492712.1	-1.99001546928606	0.0307128594054353
chr19:20645684|20646405.1	-2.93286931480476	0.000255159127581499
chr19:21033456|21034184.1	-1.47641256371529	0.039738807086372
chr19:21405129|21405856.1	-1.75994323741107	0.0202258860943552
chr19:21987216|21988909.1	-3.74280743523884	0.000612999465956141
chr19:22072809|22073564.1	-2.73258780355746	0.000819687258981425
chr19:23373742|23505981	-3.34217980481714	0.0226875825906293
chr19:29985223|29986417.1	-1.4814826158499	0.0402853252045404
chr19:32915337|32918339	-3.43569979090966	0.0204987641558147
chr19:34194478|34196763	-4.14069106942678	0.00404294065154965
chr19:34221507|34221738.1	-2.78872308119626	0.0346756063939446
chr19:34430576|34434968.1	-2.05407075449454	0.0113088829139049
chr19:3660966|3667353.1	-3.53208401107439	0.00550203483684267
chr19:39453356|39453521.1	-1.83571980755302	0.044240312801675
chr19:39457675|39459960	-3.80130603254628	0.00871357569502095
chr19:40034950|40036626.1	-2.37510066445719	0.0196368839208449
chr19:40583398|40583717.1	-1.6217768491557	0.0237909004304805
chr19:42099527|42099821	-4.60282197244432	0.00136511281914239
chr19:4354949|4355173.1	-3.03068475003134	0.0196182710287248
chr19:45025329|45028992	-3.24976308205143	0.0249939964699913
chr19:45187331|45187740	-3.34217980481714	0.0226875825906293
chr19:47264603|47264946.1	-1.73565289295097	0.0303265379611095
chr19:47362476|47362693.1	-1.79000948932517	0.0458379879415515
chr19:48149763|48151339.1	-2.9592468515061	0.0276659600691308
chr19:5039836|5047669.1	-3.00486427009179	0.0195466425765597
chr19:54909245|54910065.1	4.40507594444805	0.0228535933877325
chr19:5604583|5604936.1	-1.94283000810185	0.00734865591605204
chr19:5941621|5957973.1	-2.60600983934477	0.0265633389818824
chr19:803561|805187	-5.31428847898514	6.80509531644672e-05
chr2:119877323|119885882	-3.38513555863338	0.0216357283333476
chr2:119926598|119945240.1	-2.37852352861045	0.0104865109421668
chr2:121757240|121758806.1	-3.02478765661343	0.0136976086344257
chr2:147972739|147975975.1	-2.66869447154907	0.000424297759119319
chr2:157799427|157818559	-3.0040998653298	0.0423016270079403
chr2:161367478|161395203	-3.34217980481714	0.0226875825906293
chr2:169537227|169544835	-3.24976308205143	0.0249939964699913
chr2:172558708|172565073.1	-2.7776274304917	0.0479542236796875
chr2:172586278|172596023	-3.32719256344876	0.0229952434822799
chr2:185483034|185502739.1	-3.50115400822759	0.0117649034904219
chr2:186081330|186099830.1	-3.5716009187855	0.0080681532233308
chr2:195680032|195681050.1	4.07376284402745	0.0416971569797891
chr2:196139620|196146055.1	-1.85467024020461	0.027008639553941
chr2:197078703|197090032.1	-2.97476743112352	0.00738003783209644
chr2:199368605|199433514.1	4.1725614195073	0.0347908646413772
chr2:201022059|201024039	-3.99033845999767	0.00323342273191053
chr2:201145378|201149835.1	-2.28461247318612	0.00179780364280358
chr2:202297379|202297906.1	-2.17811464231996	0.0104615418179997
chr2:202917877|202961426	-3.34217980481714	0.0226875825906293
chr2:20739971|20740205.1	-3.06590736828873	0.0319726166525097
chr2:207724800|207742342.1	4.19361014310139	0.0336227427098082
chr2:213021993|213057099.1	3.97478879747097	0.0471994173140884
chr2:214792297|214797117	-3.22326848463877	0.02539885544177
chr2:218656150|218656463.1	-4.01780392878264	0.00171739544908112
chr2:227491547|227524915	-4.20923136508676	0.00363689146025111
chr2:230269532|230270639	-3.41960079516426	0.0182004302365322
chr2:230357805|230361697.1	2.10064217907588	0.0090135762539803
chr2:233388257|233398449.1	4.66110410264299	0.0127299670338286
chr2:241343752|241348191	-3.79474525107454	0.00879061449262103
chr2:24510969|24584560	-4.22708990898038	0.00352153890895708
chr2:26364302|26373629.1	-2.05059096134549	0.0129113379321852
chr2:27677295|27677924	-3.59436301032549	0.0104333501688093
chr2:32377588|32380290.1	4.43884403476336	0.0220415401447688
chr2:32377588|32406557.1	3.97785821984056	0.0471063539813189
chr2:37019809|37020836.1	-2.35858524810273	0.0397452694680618
chr2:37316237|37317179.1	-2.65339399736735	0.000635409256681614
chr2:39331917|39337581.1	4.05276519993813	0.0426929941660504
chr2:43578513|43590954.1	-2.64972355457705	0.0455435267574227
chr2:43912432|43918398	-3.83692350100576	0.00829542388528145
chr2:44209210|44218537.1	-1.95917494057903	0.0213519159465265
chr2:47005922|47011435	-3.32719256344876	0.0229952434822799
chr2:48346201|48362707.1	-3.53243819015871	0.00870769267865895
chr2:48498493|48511468	-3.03306725685249	0.040638872389534
chr2:53887259|53893799.1	-3.25454681911058	0.0233118218197536
chr2:55025086|55028220.1	-2.95651174399228	0.02798340188693
chr2:61482957|61490776.1	-2.75229616042827	0.0372634431775428
chr2:61495455|61499894.1	-2.18001829346639	0.0477838504778507
chr2:61873002|61876234	-3.08259846095195	0.0380347956305939
chr2:61876095|61883548	-2.88261425999147	0.0494880684243975
chr2:63433745|63439871.1	-3.09551136986211	0.011361026496969
chr2:63856306|63857936.1	-2.26466656264467	0.00939336636843225
chr2:68490190|68513680.1	-2.83156623235582	0.00550314121489477
chr2:71355719|71370005	-3.43569979090966	0.0204987641558147
chr2:71396141|71418639.1	-1.78212757525123	0.0146282405449911
chr2:72718103|72733118.1	-1.95053762603913	0.00768575219194655
chr2:74073549|74080591	-3.31537380256457	0.0217416094414073
chr2:75670138|75672016.1	-2.69697929750467	0.0425079360720467
chr2:84870225|84870785.1	-3.77767656072068	9.92907577623187e-05
chr2:85861181|85863485.1	-2.90066563983364	0.0026024481629068
chr2:86159536|86162079.1	-2.86431111457745	0.0446630084188055
chr2:8888018|8958642.1	4.62961481936169	0.0145592201372715
chr20:17952587|17955475	-3.87248464708755	0.00789219718595612
chr20:18510822|18512282	-3.32719256344876	0.0229952434822799
chr20:20653530|20680801.1	-2.76635477540654	0.0488073716022839
chr20:21339044|21344208.1	-2.29811395832999	0.0184560799280519
chr20:32366384|32371874.1	-1.79447529871053	0.0253146060956966
chr20:33619517|33623296.1	-2.0975103801997	0.00572995963072438
chr20:34031522|34033318.1	-3.07960119617779	0.00210613633759527
chr20:35858302|35863400	-4.20218541250806	0.00366679089939566
chr20:35858302|35871829.1	-3.44479264874178	0.00146760583990228
chr20:49165997|49174269	-3.83036556085059	0.00836979942142113
chr20:50902017|50904001.1	-2.80681775514809	0.0188385178294335
chr20:51473980|51524110	-3.38513555863338	0.0216357283333476
chr20:51516784|51523596.1	-2.65813917285755	0.0152433197381493
chr20:53953432|54028972.1	5.48824568677802	0.00172243507013954
chr20:53985287|54028972.1	4.04024351536659	0.0447434924754177
chr20:54157169|54171670.1	4.14620175010618	0.0362421855978874
chr20:58667490|58673711.1	-2.76106236700681	0.036722650626363
chr20:62854016|62860308	-4.33804965433928	0.00294920047175305
chr20:63775678|63790790	-3.82380775085011	0.00844464671008783
chr20:63928335|63931022.1	-2.02623425949552	0.0177212695919191
chr21:15791502|15842540	-3.0040998653298	0.0423016270079403
chr21:34102835|34125480.1	-2.22908123034758	0.0403326794911349
chr21:36247517|36248568.1	-2.7934752162799	0.000538254584318632
chr21:36338774|36344707.1	5.57432505323456	0.00133740380491037
chr21:36338779|36344707.1	-1.73572249676436	0.016277006832235
chr21:37420299|37421866.1	-2.37850467025328	0.00145875083149376
chr21:44077693|44080127	-3.37720968447187	0.0195810476344064
chr21:44855210|44861271.1	-1.52166271059466	0.0414356965136961
chr21:45128402|45134832.1	-2.58737487400849	0.00739080235235926
chr21:46643535|46644488.1	-2.58846386514582	0.0176183878996813
chr22:28724977|28725367	-2.92547701424865	0.0468989962702896
chr22:31602212|31602785.1	-2.54106662376935	0.0086259596318035
chr22:31725538|31738911	-3.34217980481714	0.0226875825906293
chr22:32478981|32479275.1	-2.35335792619615	0.00160898009278398
chr22:36341370|36349255.1	-3.07223699402232	0.00646336438629713
chr22:37650152|37650725	-3.63296008342981	0.00966425114560337
chr22:41268097|41281082	-3.2845376028535	0.0240812885704243
chr22:41338313|41339191.1	-2.20644155976597	0.047295376208325
chr22:41808875|41810291.1	-2.42085034628572	0.0117234034996935
chr22:45689712|45729590	-3.83692350100576	0.00829542388528145
chr22:46343262|46346544.1	-3.53270358597414	0.0109511063909212
chr22:46707843|46721015.1	-3.87805888124156	0.000536771963175206
chr22:49797805|49799119.1	-2.03769184929905	0.010883199112233
chr3:101267511|101304312	-4.73006251592597	0.00102095935602328
chr3:109054728|109069757.1	4.16633789827075	0.0339566417683878
chr3:119503532|119513719	-4.9833228807379	0.000320075331453538
chr3:119503532|119517315.1	-1.89734835109195	0.0320866334389559
chr3:123931102|123949132.1	4.51263833434329	0.0188341181367341
chr3:12516611|12532773	-3.31941201572322	0.0231871650683511
chr3:128262128|128264781.1	-1.7977160724041	0.0440629159778821
chr3:128806372|128807671.1	-2.80990446627349	0.0338704763237507
chr3:129880309|129880559.1	-2.28994523052179	0.00401719351022931
chr3:134183002|134195182	-3.27350455147782	0.0233422666503887
chr3:136422410|136423044	-3.38513555863338	0.0216357283333476
chr3:136464881|136502779.1	-3.15113479408662	0.0280236622520661
chr3:138570318|138571356.1	5.75404833033541	0.000670171631368628
chr3:142425222|142426841.1	-1.90919108257284	0.0421221470132001
chr3:142736379|142748460	-2.95379287453274	0.0450344272110586
chr3:143795001|143832221.1	5.00422223226714	0.00596010971855464
chr3:149846011|149872154.1	-1.73396934265542	0.0279540098284525
chr3:151116338|151127984.1	5.64323381922261	0.000940009520676788
chr3:152414941|152432920.1	-1.85840839634206	0.0170714040569656
chr3:15411245|15415942.1	-3.31877470730895	0.00221189452824847
chr3:156694020|156696025.1	-2.22936565369601	0.0300510680320914
chr3:16294856|16303592.1	-3.25454681911058	0.0233118218197536
chr3:16301626|16303592.1	-3.09584329414006	0.00223808356253342
chr3:179203544|179204588.1	-2.62367675148181	0.0032019888386386
chr3:183205876|183207823.1	4.44465146251192	0.0210334651446297
chr3:18378170|18420991.1	-2.52554979521138	0.00243601842112363
chr3:18415111|18420991.1	-2.47504226260202	0.020741154110344
chr3:18463480|18527326.1	-2.50790025513695	0.0138161602572681
chr3:195381009|195392147.1	-1.70049988928893	0.0212132368300824
chr3:195878253|195888606.1	-2.66723806778279	0.0136559658225592
chr3:195959183|195960086.1	-2.30527097645417	0.049727501448213
chr3:196806579|196807914.1	-2.65535817174535	0.00285062774026074
chr3:19950806|19951061.1	4.17130174931757	0.0356720855570509
chr3:20071584|20072459.1	-3.08991850280053	0.0228480068881619
chr3:3156219|3174261.1	-2.05230378455461	0.0138556875975594
chr3:31576396|31580096.1	-2.61904507525583	0.000508952003139984
chr3:31576396|31600459.1	-2.26652627873213	0.0473336003616864
chr3:33812072|33822082.1	-2.7288328259321	0.0122230810143946
chr3:37383226|37386370.1	4.93099017253596	0.00729936722446571
chr3:43299754|43303792.1	-2.24096433416442	0.00290291647414194
chr3:4410865|4420146.1	4.20456737190283	0.0327129431252751
chr3:47169169|47169396	-3.57982133248243	0.0107564043094336
chr3:50113383|50114251.1	-2.56497854391162	0.0373205265647648
chr3:52412811|52414587.1	-1.56566842755209	0.0414945298629354
chr3:52737586|52741499.1	-2.66699181587994	0.00371592421249331
chr3:52926031|52928341.1	-2.30781771716112	0.0137271188881814
chr3:53874211|53876080.1	-2.42814226608094	0.0401580719343186
chr3:56563684|56567053	-3.29229135416694	0.0238853915181877
chr3:56627037|56628614.1	-2.39518311147194	0.00152193987980586
chr3:60011371|60014264.1	-2.72004317897482	0.0169376843700088
chr3:66405198|66462509.1	-2.52407140760265	0.0136260905045776
chr3:67400731|67409034.1	-3.87849756365785	0.00310118649737502
chr3:67495798|67508903.1	5.89875728307073	0.000394244300829848
chr3:71015549|71053773.1	-2.86105828081581	0.00830843119078122
chr3:71041328|71053773.1	-2.02066032872396	0.00678159813866343
chr4:102580535|102582957.1	-1.77697814094301	0.0274300757673739
chr4:104518577|104519454.1	5.11900460739105	7.35616707471319e-07
chr4:105446383|105456745.1	-1.8999090358362	0.038942418990108
chr4:106171095|106212835	-3.31683018591236	0.0217498878477925
chr4:107944970|107947537	-3.79474525107454	0.00879061449262103
chr4:108078220|108089257	-3.24976308205143	0.0249939964699913
chr4:109462901|109481781	-3.86593352938205	0.00796392863418829
chr4:109659011|109664394.1	-3.05158845621568	0.0013020920860184
chr4:109940946|109945275.1	4.05544978732189	0.0403413616944023
chr4:119596523|119607297.1	4.73708156472737	0.0110945735735876
chr4:127921524|127939997.1	-1.67903860651186	0.0345578646613815
chr4:127930683|127933093	-3.25418677473779	0.0241224162874048
chr4:139058669|139073567	-3.32719256344876	0.0229952434822799
chr4:139125164|139139497.1	-1.91811295391884	0.0261395673869863
chr4:142082031|142124760	-3.32719256344876	0.0229952434822799
chr4:143543509|143543972.1	-1.62039844085926	0.0377210198530322
chr4:146292929|146294095	-3.24976308205143	0.0249939964699913
chr4:152411303|152411872.1	4.99702964441998	0.00650698042226592
chr4:15816511|15825016.1	-2.41898967322791	0.0482115957866633
chr4:165989381|166025431.1	4.71889792712313	0.0123857365468391
chr4:166039339|166060188.1	4.16547620119352	0.0353362867375039
chr4:166039339|166065863.1	4.18264631527652	0.0345726817868752
chr4:166039339|166078030.1	5.35161803112414	0.00249229422848206
chr4:166055076|166078030.1	4.31955313253358	0.0272275222322102
chr4:169507037|169508331.1	-2.40103107160355	0.0323798885779007
chr4:1730887|1735834	-3.29229135416694	0.0238853915181877
chr4:173384651|173403950.1	4.34952818590251	0.0260974601440694
chr4:185247294|185267155.1	-2.63484015615969	0.0117198272423225
chr4:185418441|185418770.1	-3.29646143475743	0.017695656003128
chr4:2490337|2497121	-4.80810671206032	0.00065628611286693
chr4:2954424|2956811	-3.33498010729747	0.022804172283749
chr4:36107565|36121326.1	-2.59787878031687	0.0475669453405643
chr4:37631385|37638504.1	-1.87598766559092	0.00956059864005107
chr4:39841948|39844801	-3.90225277024803	0.00758722660559454
chr4:39913611|39922748	-3.80130603254628	0.00871357569502095
chr4:42616033|42627109.1	4.26414767543792	0.0297901404666457
chr4:51863437|51877854.1	-1.92271462102578	0.0144464291269989
chr4:51863437|51886638	-4.8671575640715	0.000551281476330619
chr4:55453054|55456300.1	-2.79101792006781	0.0469170495876975
chr4:76124649|76144473	-3.34217980481714	0.0226875825906293
chr4:83308845|83310078.1	4.29608583380653	0.0281928989322419
chr4:86764593|86767976	-4.17000721763715	0.00130212414257728
chr5:103096541|103097781.1	-1.85806192536055	0.0140851555898867
chr5:10415488|10417404.1	-3.22524576688531	0.000616071420439683
chr5:1057471|1065478.1	-2.57897332028404	0.0291987620837096
chr5:1060344|1065478.1	-2.82188789514673	0.0137904712667154
chr5:109713520|109729513.1	-2.32489377807049	0.00267478517679111
chr5:131255095|131316144	-3.34217980481714	0.0226875825906293
chr5:134158455|134174022.1	-2.74046864874808	0.0324731311813521
chr5:134199086|134206131	-3.24976308205143	0.0249939964699913
chr5:137942875|137943216.1	-2.49796661867814	0.00746961828292295
chr5:139600372|139623461.1	-1.92333849254617	0.04794991433581
chr5:139614586|139623461.1	-2.78462545787648	0.0475465846368529
chr5:141580744|141583615.1	-2.5249734588084	0.0388599278909488
chr5:142885298|142932125.1	-2.941156901913	0.0084800935720941
chr5:143054439|143057747.1	-1.64131994733408	0.0394293436538846
chr5:14673642|14693094	-3.24976308205143	0.0249939964699913
chr5:151790323|151791062.1	-2.00911594176508	0.0237847070704729
chr5:151797227|151799313.1	-3.10315985381783	0.0300108484393476
chr5:154033791|154034946	-3.43569979090966	0.0204987641558147
chr5:154033791|154034967.1	-1.66141002502138	0.0260376977552887
chr5:154871730|154872651	-3.79474525107454	0.00879061449262103
chr5:156948416|156949731.1	4.20776002851979	0.0344914066497589
chr5:163443674|163444481	-3.29229135416694	0.0238853915181877
chr5:176943335|176951577.1	3.9298271200788	0.0498384550919503
chr5:178222355|178225429	-4.30220128485037	0.00313206965147229
chr5:179560025|179577136.1	-2.59961693660961	0.0299309441033406
chr5:179705679|179710065.1	-1.88982749816022	0.0281752560805225
chr5:180248973|180280608	-3.2845376028535	0.0240812885704243
chr5:38990949|39003622.1	-2.71531079724507	0.00191162367245676
chr5:39002535|39021136.1	-2.84205782883191	0.0077853579802014
chr5:43675511|43677806.1	-1.53390511017339	0.0460532328044007
chr5:50274988|50411383.1	-2.29972350965745	0.0138437636808341
chr5:50750151|50763242.1	-2.45709150681695	0.00753138349161753
chr5:58988493|58993465.1	-2.06110641261567	0.0412418554472006
chr5:65567513|65572286.1	-2.78219513987086	0.000384596143658489
chr5:65680494|65685472.1	-3.92663961157585	0.00214382104630422
chr5:66012049|66014725.1	-2.54017160579096	0.00357822209075005
chr5:74715510|74716673.1	-2.50071932466914	0.0203916820553954
chr5:76441393|76462314	-4.56047805382991	0.0015011989586305
chr5:77046347|77048272.1	-2.04846495262376	0.0425863392787658
chr5:79656958|79669028.1	-2.5905858117253	0.0160790027226645
chr5:80146090|80147284.1	-3.69897879739938	0.000135616023165298
chr5:80725453|80744615	-3.43569979090966	0.0204987641558147
chr5:83537007|83555038.1	4.10848003057894	0.0393128723630826
chr5:98868495|98872555	-4.01263979886173	0.00251265467667689
chr6:100766565|100767345.1	-2.96548724895536	0.0200246372527482
chr6:106583328|106602922.1	-3.03338534562192	0.0341467501720822
chr6:109475399|109476930.1	-3.7209330652337	0.00569043202723083
chr6:116692055|116726622.1	-2.48512546957575	0.0461739388919973
chr6:116698704|116705160.1	-1.82628910758257	0.0132443341555163
chr6:118448404|118449870.1	-2.20620149556527	0.0119549960747236
chr6:127812883|127813931.1	-3.15064210057538	0.0113270839613935
chr6:13579451|13584225.1	-1.79278521325181	0.0155977485318677
chr6:13579451|13600949	-4.48572447728568	0.00177772948233519
chr6:138941335|138944622	-3.58467568292231	0.0106476409452534
chr6:142820033|142837047	-3.33498010729747	0.022804172283749
chr6:144537582|144539443.1	-1.84228284703016	0.012926979850736
chr6:147205971|147239270.1	-1.92955916001946	0.0416009233583697
chr6:158580940|158608750	-2.92547701424865	0.0468989962702896
chr6:20546346|20548705.1	-2.27360770934646	0.0311545313953375
chr6:24835703|24843554	-4.57684273353046	0.00145102784834292
chr6:29890246|29944616	-5.19873521634002	0.00012732212479179
chr6:3085259|3104315.1	-2.72130183218861	0.0416337198357999
chr6:32519370|32580856.1	5.82536112339458	0.000748457231676544
chr6:32661967|32757883.1	4.88219575519869	0.00881521646933831
chr6:35312302|35312772.1	-1.66394598894772	0.037576827775057
chr6:35619096|35620274	-3.86593352938205	0.00796392863418829
chr6:35619096|35642843.1	-2.61489467245515	0.0478810483034184
chr6:35637014|35642843	-3.34151286108572	0.0208384985529102
chr6:36158648|36158941	-4.00129023350676	0.00661560859154016
chr6:43055545|43056445.1	-2.6312351429043	0.0157976736305798
chr6:57050774|57055797.1	-2.36841478229453	0.014824954548597
chr6:70533160|70538401	-3.33498010729747	0.022804172283749
chr6:7303550|7310029.1	-3.18843905086548	0.000509778290838768
chr6:73635382|73636707	-4.56047805382991	0.0015011989586305
chr6:75647731|75659407.1	-3.48807376708049	0.00120780124373936
chr6:75702645|75703072.1	-2.39933184764859	0.00221197200388696
chr6:79060478|79060818.1	-3.29681026257212	0.000789669858428588
chr6:82214227|82214829.1	-1.82713434466165	0.0224284831382018
chr6:83398367|83407901.1	-2.85101346268788	0.0425359675610007
chr6:87215903|87233527.1	-2.47574530448775	0.045282616990744
chr6:89751431|89753622.1	-2.37168590349556	0.0158447252283484
chr6:90206569|90271941.1	-2.68622302140443	0.00663119941011989
chr6:90249689|90271941.1	-3.71573128318037	0.000109838428749107
chr7:100023419|100024307.1	-1.65133187724093	0.0213618923550421
chr7:102227367|102227669.1	-2.2680877752213	0.0107084537633771
chr7:103025063|103029418.1	-3.2788153217709	0.00843957078123849
chr7:103319609|103319844	-3.38513555863338	0.0216357283333476
chr7:105090009|105091314.1	-3.33760881069822	0.00536617934292675
chr7:107281300|107283732	-4.58827943074219	0.00141174425629718
chr7:114942275|114946213	-3.40864075596386	0.0185761825688367
chr7:114942275|114979781.1	-3.55358628092691	0.00873294846366133
chr7:12224226|12229819.1	-2.21042990335856	0.0229446967073468
chr7:128579999|128592017.1	-2.60810837385231	0.031810600474663
chr7:128989961|128993914	-3.31941201572322	0.0231871650683511
chr7:136020701|136031033.1	-2.3029445743106	0.0103228933120968
chr7:141636960|141649333.1	4.13122206986388	0.0367669031644837
chr7:150233035|150235253.1	4.38288939744702	0.0243508997928078
chr7:155672867|155680908.1	-1.54395896250893	0.0327450807177191
chr7:17890363|17897446.1	-2.18392163367165	0.0472682414755714
chr7:18666213|18666476.1	2.99325656085814	0.0198446077886021
chr7:2229984|2230724	-2.99011692039585	0.0429866944825083
chr7:22976210|22984045.1	-3.21160226498341	0.0079573331663123
chr7:24623666|24641868	-5.01622932413542	0.000286556066877932
chr7:24623666|24668660.1	-2.15614964487695	0.0186589040242317
chr7:27629371|27649633.1	-1.63371179417614	0.0393780352564661
chr7:27785163|27785489.1	-1.93481131014094	0.0131669445378234
chr7:39987599|39988258.1	4.16248263960558	0.0363584286266931
chr7:43639449|43640649.1	-2.65964981871397	0.00962135491468805
chr7:44645327|44647759.1	4.29306375140915	0.0281389734586923
chr7:4983671|4989177	-5.16331035926653	0.000145739057699612
chr7:50319048|50327757.1	-2.45954646438607	0.000990691004623765
chr7:55982210|55984878	-3.29229135416694	0.0238853915181877
chr7:5641154|5652510.1	2.25789205616337	0.0449244892792651
chr7:64336259|64336982.1	-2.90673971781689	0.00712177553123095
chr7:66991137|66994341.1	-1.99088311956183	0.0315636786660578
chr7:6814764|6822364.1	-3.17601597762575	0.00252137860288453
chr7:6814764|6823360.1	4.39780915538122	0.0227372533208923
chr7:72831602|72831798.1	-3.19476866837815	0.0106654897403354
chr7:90726567|90790652	-3.34217980481714	0.0226875825906293
chr7:92294889|92307656.1	-2.01977629281376	0.0156507870428607
chr7:99390893|99391253.1	-3.32663173187219	0.00848380536300308
chr7:99403398|99404953	-3.82380775085011	0.00844464671008783
chr8:100704297|100713181	-3.29229135416694	0.0238853915181877
chr8:100709133|100713181.1	4.52927397257361	0.0184429268883461
chr8:103430612|103435790.1	-2.80861045046381	0.0346534323202256
chr8:105419144|105444381.1	4.56561954453922	0.0163272902837354
chr8:115587001|115623758	-4.41248998697484	0.00261251471704281
chr8:124320086|124327421	-3.41960079516426	0.0182004302365322
chr8:131940499|131946633.1	-2.09302877589605	0.0134607921407086
chr8:132722040|132757294.1	-1.90626186844013	0.0337567302164757
chr8:134812610|134813169.1	-1.90399853928907	0.0481493542673448
chr8:140221459|140252929	-3.24976308205143	0.0249939964699913
chr8:22474954|22513432	-3.86593352938205	0.00796392863418829
chr8:2492872|2494091.1	4.09076339070377	0.0419195158779852
chr8:28129502|28137891	-3.24976308205143	0.0249939964699913
chr8:37765526|37766355.1	-1.87635429532568	0.00946242029883016
chr8:38788704|38820635.1	-2.47597062049087	0.0455496287075484
chr8:42325970|42329214.1	-1.71550945429439	0.0301439127218966
chr8:47394978|47407961.1	-2.75543002070755	0.0156935751763751
chr8:51860845|51861246.1	-1.89683905821674	0.0112520535763173
chr8:51860861|51861246.1	-3.1013837490705	0.00441842784761832
chr8:66572482|66573506.1	-1.85792189338819	0.0352028391271347
chr8:66601698|66602523.1	-1.84519444652873	0.0474110281444686
chr8:668598|674047.1	-3.45685888996771	0.000354914820196779
chr8:67118248|67137603.1	-2.51921397066417	0.00558313884208811
chr8:70159505|70162854.1	-1.82469219160417	0.0176569564872036
chr8:72052539|72076627.1	4.95249582130721	0.00700715598820168
chr8:8933853|8935790.1	-3.68841231417991	0.002906318646
chr8:98706467|98707311.1	-2.76365840368371	0.00213466967019213
chr8:99520899|99556653	-3.37729385129918	0.0218216252431408
chr9:100016322|100022226	-3.95831097520513	0.00702355518855037
chr9:106972005|106984409.1	4.25287837007482	0.0302137422665899
chr9:109050283|109064567.1	-3.47494603139267	0.009965849971193
chr9:109106508|109108570.1	-2.36110244982826	0.00204157949323792
chr9:110972073|110973558.1	-2.41083771362113	0.0148667674516206
chr9:112098470|112102285	-3.29229135416694	0.0238853915181877
chr9:121171159|121171548.1	-2.39113764919589	0.0130535715242254
chr9:123757703|123769563.1	-3.51786088701948	0.00180430109251074
chr9:124899329|124900547	-4.59969711949136	0.0013798671701784
chr9:125657651|125672643.1	-1.77096245370846	0.0472029039790095
chr9:131506114|131506453.1	-2.36625360853121	0.00142507848447833
chr9:135881633|135883078.1	-1.73453495744639	0.0160056462161796
chr9:137811461|137818138.1	-2.500982860147	0.0313326029258081
chr9:20413721|20414425.1	-2.39808779403428	0.0495918676175608
chr9:20923660|20933103	-3.25418677473779	0.0241224162874048
chr9:31119792|31128558.1	4.60031528902485	0.0159225464836314
chr9:31180095|31235419.1	4.4083748425854	0.0229827002294057
chr9:31230549|31235419.1	4.66555101023794	0.013685250445993
chr9:31233747|31235419.1	5.88578529413939	0.000791769078331586
chr9:37126312|37147445.1	-2.07637777125203	0.00621120061488771
chr9:37768076|37770739	-4.22708990898038	0.00352153890895708
chr9:4860125|4860901.1	4.24731359255781	0.0304040877587167
chr9:5801176|5805785	-4.22708990898038	0.00352153890895708
chr9:5968019|5988545.1	-1.79542837464895	0.0376264375871092
chr9:71740063|71740232.1	-2.36416544292638	0.0135038407430751
chr9:74816669|74816964.1	4.01492854219535	0.0452086522757794
chr9:75016268|75017448.1	-2.57459467012885	0.00429489560649102
chr9:77214329|77227485.1	5.00389882071629	0.00592844426917259
chr9:77381976|77407607.1	4.70359353422004	0.0118521378121154
chr9:77794463|77797648.1	-1.7729180896166	0.0345810143399747
chr9:83661777|83669327.1	-2.70640590129727	0.00565086206094054
chr9:83678441|83683066.1	-2.96111213372227	0.0143705426930827
chr9:83678441|83686155.1	-1.65028561816793	0.0426475433675245
chr9:83679775|83686155.1	-2.11877529526669	0.0101145283625408
chr9:83682951|83686155.1	-1.64212078935338	0.0268615538443532
chr9:85642827|85646418	-3.37729385129918	0.0218216252431408
chr9:96458379|96458541.1	-1.96981318355752	0.0169409519640805
chr9:96458379|96471094.1	-3.08631147747597	0.00950988519019494
chr9:96522506|96565483.1	4.03252729893373	0.0429073258337073
chr9:97994631|97998678.1	4.02834593434056	0.0421384936806116
chrX:101041317|101042312.1	-1.77842996318246	0.0245205400027729
chrX:110067347|110109146	-3.38513555863338	0.0216357283333476
chrX:118542725|118546116.1	-1.78935207381796	0.0260774920838245
chrX:1285778|1290509.1	-1.81827635017864	0.0360215319024137
chrX:132281095|132283032.1	5.66048939400051	0.000968406540887322
chrX:150592605|150619139.1	-2.05390102518348	0.0362718152859739
chrX:150727215|150732730	-3.86593352938205	0.00796392863418829
chrX:150736595|150737448.1	-2.40298776524639	0.0252502310577058
chrX:155545096|155548224	-3.27920038761485	0.0231222476117605
chrX:1593444|1595532.1	-4.44273874195583	4.79918351775349e-07
chrX:24172715|24179770.1	-1.98503616245529	0.0331607098192099
chrX:51327721|51357027.1	-2.16167940649576	0.00374702291387296
chrX:57331598|57341390	-2.91823172845095	0.0472234790987748
chrX:65051462|65107023.1	4.26483925961552	0.0304918388680722
chrX:65075474|65075912.1	-2.84103773670171	0.00307628819322531
chrX:85303406|85308216.1	4.92880753160257	0.00728985648734766
chrY:12912963|12914649.1	-3.1537929871418	0.014595617678449
chrY:2953909|2961646.1	-2.28251943323907	0.00272820282509435
chr1:103565435|103575540.2	-3.48925870370251	0.00194648805358505
chr1:108148279|108161293.2	-2.37533860863329	0.0106821683683138
chr1:110891392|110892533.2	-2.04050493960296	0.00926328332930575
chr1:111147642|111161296.2	-1.80771437986485	0.0479165863255882
chr1:112653598|112667145.2	-2.50180068401386	0.0317256360220717
chr1:116760402|116764606	-3.33498010729747	0.022804172283749
chr1:150440923|150446401.2	-2.7186655764492	0.0165177317910667
chr1:151166934|151167414.2	-2.27374745597291	0.0022140513786141
chr1:151242123|151242567.1	-3.24976308205143	0.0249939964699913
chr1:154234591|154235291.2	-2.42152273576575	0.0247795519150479
chr1:155378281|155380116.1	-3.80130603254628	0.00871357569502095
chr1:155675010|155679512.2	-2.7029834699034	0.00145712764750486
chr1:155676548|155679512.2	-2.30959839967011	0.00229226472859964
chr1:155725382|155726019.2	-1.72530322606318	0.0234149254269413
chr1:155853276|155853806.2	-1.42930049633259	0.0452212695898021
chr1:15638307|15643650.2	-2.13009172577408	0.023617662456726
chr1:160323431|160332557.2	4.51990970950675	0.0182119191808814
chr1:176116624|176136547.2	-2.95837575307782	0.020782181836921
chr1:194159280|194167715.1	-4.3466019683334	0.000689816239745638
chr1:197642711|197658369.2	-2.42952159230906	0.00536966593610648
chr1:202157739|202158301.1	-4.57854411008357	0.00145043233082189
chr1:205616478|205623891.2	-1.41217776242809	0.0495189061597198
chr1:212342188|212347406.1	-3.29229135416694	0.0238853915181877
chr1:22078429|22091501.2	-2.91878278767624	0.0115322338753405
chr1:223954477|223962273.2	-2.43026128875402	0.0474597867244362
chr1:23030469|23050520.2	-1.82990040365728	0.0134333787716672
chr1:231537213|231542611.2	-1.74215224106065	0.0363665760252652
chr1:231795242|231818517.2	-2.10255305555435	0.00909203480651295
chr1:233090061|233095863.2	-2.71849468887933	0.0079259505178542
chr1:233198939|233208689.1	-4.63681831596313	0.00126884994477323
chr1:233217899|233227371.2	-2.56250905312502	0.00494118163483112
chr1:24169417|24180854.1	-3.32719256344876	0.0229952434822799
chr1:243695591|243843282.2	-2.05492615463016	0.0478272412487451
chr1:244843135|244848856.2	-2.4916743050193	0.0443123465405344
chr1:247157000|247159813.2	-3.34275839713656	0.00296644154710626
chr1:26446316|26447660.2	-1.86506639615545	0.0183841429908139
chr1:26453609|26463433.1	-4.760356362852	0.000750602604786646
chr1:28473554|28480604.1	-3.34217980481714	0.0226875825906293
chr1:29154696|29154910.2	-3.27938930606849	0.000437526218089965
chr1:31915895|31919658.2	-2.88199686985985	0.000197159560627766
chr1:32279671|32280210.2	-1.97766780501414	0.00834332420598843
chr1:32631827|32634792.2	-1.58659552100737	0.0480968108787978
chr1:35831427|35835993.1	-3.90225277024803	0.00758722660559454
chr1:40189055|40202614.2	4.14368640880996	0.0355616291932976
chr1:41070595|41075451.2	-1.69479765793197	0.0197556885311479
chr1:51827796|51834170.2	-1.72581620329205	0.0397413856355742
chr1:52493611|52509712.2	-1.91947672524445	0.0128617016341673
chr1:58506060|58534331.2	-2.03940372276049	0.0372812156864184
chr1:58506060|58536741.2	-2.01969765750065	0.00928011095635985
chr1:58527261|58536741.2	-2.46267683733416	0.0460101253738856
chr1:66891154|66905375.2	-2.10779626421464	0.00595719971312644
chr1:805799|810170.2	-1.73823301949792	0.0187390353985535
chr1:8614561|8656441.1	-3.34217980481714	0.0226875825906293
chr1:92333391|92380873.2	-1.47215781514599	0.045185996333455
chr1:92605307|92636336.1	-2.95454931684257	0.0451065012188231
chr10:100260218|100262063.2	-2.09743380901495	0.0286569348406418
chr10:101939863|101957732.2	-1.86261015422827	0.0390709881303282
chr10:103622470|103661114.1	-3.43569979090966	0.0204987641558147
chr10:11997672|12014184.2	-2.10227462791469	0.00693821583678464
chr10:124706636|124706887.2	-3.54313728064361	0.00131135219440772
chr10:130166507|130171636.2	-3.07812783090682	0.0110829867123479
chr10:131308211|131309299.2	4.70367606058371	0.0124345609183105
chr10:14520977|14530515.1	-3.37729385129918	0.0218216252431408
chr10:15833630|15847943.2	-1.58491181897552	0.0336289307047394
chr10:16752539|16782084.2	2.01390427122711	0.0336070469415103
chr10:26500819|26513660.2	-2.14927082685592	0.049490823621903
chr10:27142387|27145590.2	-2.06545359256839	0.0065977295285865
chr10:32565558|32584304.2	-1.51945787872356	0.0345387568645453
chr10:4830675|4847299.1	-3.86593352938205	0.00796392863418829
chr10:4830675|4909606.2	-3.57593872807108	0.00798354098313853
chr10:48401612|48410168.2	-1.86645916906386	0.0190618531297168
chr10:5785142|5800705.2	2.65095325052292	0.0464539014110812
chr10:62388396|62399793.2	2.62074707594913	0.0489161698570695
chr10:68959806|68960249.2	-2.30367794206467	0.0096840066009964
chr10:7276892|7285954.2	-1.74215624650369	0.0160298613475143
chr10:7797047|7802854.2	-2.00552733440169	0.00552045253298868
chr10:84417771|84425893.2	-1.81321241531781	0.0124770537740697
chr10:84438512|84477664.2	-1.62110488027393	0.031603058739104
chr10:863743|885760.2	-2.74916754523232	0.0376019447127993
chr10:93381219|93389154.2	4.27725687561974	0.030236836302221
chr10:97436417|97437750.2	-1.80029978137658	0.0128378076844104
chr11:108176246|108177090.2	-1.87215152256408	0.00951780850364196
chr11:108227595|108229323.2	-2.5464203745665	0.000644147780910419
chr11:108267171|108267342.2	-2.08236151754867	0.00394156992308048
chr11:108299714|108304852.2	-2.99875364528629	0.0200348767528703
chr11:110136663|110137414.2	4.79432215130901	0.00975218242908393
chr11:118581246|118584644.2	-2.53929657526877	0.0256659882041142
chr11:14771937|14789242.2	-1.84428158295924	0.0110899314298794
chr11:14771937|14819209.1	-2.9051159782953	0.0480337938101016
chr11:34071726|34076642.2	-2.40085021760069	0.0294209093927159
chr11:34957384|34978182.2	-2.10511374638239	0.0214091544032203
chr11:61437625|61438113.2	-1.98663809720243	0.0190076663774299
chr11:66639700|66640123.2	-2.22829241386831	0.00289407121158258
chr11:68567014|68576043.2	-1.90545737505982	0.0253899099134585
chr11:68601863|68603492.1	-3.38278425681619	0.0193930087574201
chr11:77683710|77693611.2	-1.41349760529776	0.049562728062254
chr11:85996826|86003451.2	-2.04999569292657	0.00804515427681556
chr11:95812932|95813589.2	-2.24666837228614	0.0220237907073279
chr12:111509549|111510582.2	-1.84927745568826	0.0397573251192949
chr12:112502144|112506422.2	4.30160629534034	0.0291307089371612
chr12:116230533|116237705.2	-1.47009571525543	0.039908925628724
chr12:11869424|11869969.2	4.10220615213679	0.0396714613366997
chr12:120782655|120784593.2	-2.42726097815249	0.0011260559482822
chr12:121780872|121781192.2	-1.65527712704881	0.0267892932484006
chr12:122340753|122341697.2	-2.28518543955272	0.00587261731475895
chr12:12244262|12244655.2	-2.80767017038124	0.0456323984496993
chr12:122511109|122515227.2	-2.60256525958956	0.00834651195492542
chr12:124419957|124437996.2	4.34057606469997	0.0260189179104244
chr12:124419957|124449867.1	-3.24976308205143	0.0249939964699913
chr12:128808788|128815070.2	-2.83670246963528	0.0312443568288031
chr12:24832723|24836596.1	-3.76565382767454	0.00914676424472611
chr12:2873977|2874525.1	-3.43569979090966	0.0204987641558147
chr12:32607957|32611283.2	4.37881112323099	0.0240286882891167
chr12:350621|354234.2	-2.70385542663818	0.0427744062750345
chr12:42210355|42210680.2	-1.73585292192143	0.0185688014201199
chr12:42210355|42212484.2	-2.68948376202744	0.0170906425700718
chr12:46229153|46243314.2	-2.00747411569984	0.00860053919145596
chr12:46239679|46243314.2	-2.44166740637651	0.000893402166973204
chr12:56568975|56571855	-3.43569979090966	0.0204987641558147
chr12:57395749|57398198.2	-2.09061749914766	0.0208448194171168
chr12:69589485|69593613.1	-4.0697081597035	0.00211784086392453
chr12:69800209|69801721.2	-1.81954439486051	0.0113224287055757
chr12:71769800|71774022.2	-2.90533904774543	0.0212409687674184
chr12:8039819|8040165.1	-3.95831097520513	0.00702355518855037
chr12:94169153|94186473.2	-2.13747775334506	0.0157596608969526
chr12:9680923|9694969.2	-2.11598985474653	0.0115265723459398
chr13:27427092|27430621.2	-2.52784644923182	0.0155248611675354
chr13:42926336|42970670.2	4.45528500294142	0.0208588686706868
chr13:49451553|49451909.2	-1.74419689268652	0.0180982444932353
chr13:49506635|49513166.1	-3.31941201572322	0.0231871650683511
chr13:50927407|50949505.2	-1.64398875097171	0.0220350591439852
chr13:77719532|77753358.2	-3.11912136276056	0.000306561418354976
chr13:99238427|99244624.2	-1.60921992839474	0.027558100366613
chr14:102040236|102040673.2	-2.00570411942672	0.00561594982972541
chr14:22909483|22911403.2	-1.96397054515783	0.00848639433873631
chr14:30580864|30581116.1	-4.3697425373534	0.00280294791090354
chr14:32090502|32094386.2	-1.68715250135884	0.0255228895455096
chr14:32090502|32117287.1	-4.89899332436499	3.01702954765855e-05
chr14:34575756|34609742.2	4.20613642267461	0.0326451967222858
chr14:34862044|34862322.2	-2.20481079753145	0.00297712868907911
chr14:35126735|35127611.2	-2.32401606031542	0.0169038430291124
chr14:35126735|35180777.2	-2.69142269963695	0.0287588530993858
chr14:45118028|45130790.2	-1.81362111622641	0.0116350576434285
chr14:49663315|49674427.2	4.08157651210689	0.0398349036911574
chr14:58318542|58330169.2	-2.49521409658576	0.0154299771339335
chr14:61721509|61721823.2	-2.60049222934362	0.00445425593355635
chr14:65561337|65629606.2	4.66763483164871	0.0134259316759116
chr14:67685015|67690421.2	5.21870797524151	0.00339471002028547
chr14:71400794|71418196.2	-2.41233724599285	0.00946412765333476
chr14:71413948|71418196.2	-2.52775781405546	0.000880650900530547
chr14:71413948|71529370.2	-2.67118107337419	0.00361655190855593
chr14:75109685|75110371.2	-1.80550675781439	0.0149401498997627
chr14:76166663|76180849.2	-2.26978756999483	0.0262046257159902
chr14:77464598|77465667.1	-4.57854411008357	0.00145043233082189
chr14:91338005|91343657.2	-2.22720519759551	0.0412979084440209
chr14:91342380|91343657.2	-1.95892078782031	0.0170180281072613
chr14:91481576|91485730.1	-2.91823172845095	0.0472234790987748
chr14:99257471|99257836.2	-2.17379405395351	0.00321643642993236
chr14:99257471|99257839.2	-2.21258327763868	0.00684013348634544
chr14:99458279|99465813.2	-1.99990030890072	0.00777101820370361
chr15:100330889|100334180.2	-4.10312941756774	6.43308982718627e-05
chr15:41668828|41713496.1	-3.38513555863338	0.0216357283333476
chr15:42827928|42840433.2	-1.90334376295811	0.0385513149941332
chr15:42950262|42966286.2	-3.25846657135122	0.00920060108915696
chr15:44331988|44338317.2	-1.6575751035021	0.0267671905787845
chr15:50569887|50575789	-3.34217980481714	0.0226875825906293
chr15:59030804|59031702.2	-2.14570915636152	0.0348224679288556
chr15:60442416|60445791.2	-1.78583419925088	0.0190107652980897
chr15:64499293|64500166.2	-1.76797439238605	0.0171044973295678
chr15:68141946|68146700.2	-2.87496559284866	0.00134349646521259
chr15:76287846|76292700.2	4.69272206650924	0.0123464725459736
chr15:84680713|84691644.2	-2.46544192045463	0.00373577802879382
chr15:84687625|84691644.2	-2.59410586176265	0.00550438902521391
chr15:90439332|90443478.2	-1.73580605191853	0.0183752831280176
chr15:90486954|90487582.1	-4.490747421114	0.00175824686792409
chr15:98707562|98708107.1	-4.81474565303893	0.000638421318193354
chr16:21612645|21625115.2	-2.41261877429524	0.0388702495869314
chr16:27213585|27215008.2	-3.31785663069361	0.000259716658270255
chr16:30483827|30484263.2	-1.71600735539614	0.0183730283826827
chr16:30728966|30729572.2	-3.03866902312198	0.000202505990565809
chr16:31090775|31091342.2	-2.29556224804525	0.00234930092612903
chr16:47497399|47515601.2	2.79816129189983	0.00917582625588141
chr16:53439016|53447106.2	-3.10828998062291	0.003487450166478
chr16:58559804|58560362.2	-1.8137784119277	0.0127188477166134
chr16:66805777|66806026.2	-2.7513882809266	0.00977998232707717
chr16:69370483|69372355.2	-1.50957382005638	0.0423029773318127
chr16:8920359|8930397.2	-2.3854056837712	0.00463159361244808
chr17:18306891|18308941.1	-3.2845376028535	0.0240812885704243
chr17:18865469|18865952.2	-1.93993569656633	0.0353134206955697
chr17:29451455|29451680.2	-2.13379946666901	0.0480089218198377
chr17:37440505|37440662.1	-3.86593352938205	0.00796392863418829
chr17:4066447|4072756.2	-2.08671648685847	0.040054227861071
chr17:42727635|42730918.2	-2.49213704909829	0.0418016713820737
chr17:47618350|47619164.2	-2.78256700074032	0.00390703459938457
chr17:49311312|49312042.2	-2.4074544831226	0.00100951138633878
chr17:49311312|49312845.2	-1.78294802931886	0.0337980397071126
chr17:55401469|55403868.2	-3.03074438781343	0.00634960964578092
chr17:59731421|59738947.2	-2.35719499327889	0.00184936847714558
chr17:59764971|59773885.2	-1.84973966963563	0.0443795771125158
chr17:64519321|64526200.2	-2.98258151198278	0.0370181774878124
chr17:75242336|75243570.2	-2.52877466615752	0.00142749420755868
chr17:78400735|78401057.2	-3.18108991271504	0.00357027666186482
chr17:79077430|79077864.2	-2.36193750091125	0.0150824608098
chr17:80289659|80290728.2	-2.74587110138829	0.0409251658452586
chr17:9969677|10019897.1	-3.33498010729747	0.022804172283749
chr18:196637|204692.1	-4.59268105580148	0.000178365620673769
chr18:21656861|21664230.1	-3.2845376028535	0.0240812885704243
chr18:76441245|76443211.1	-3.08259846095195	0.0380347956305939
chr18:76849526|76851939.2	-1.5551412963286	0.0331840193861588
chr18:79695225|79704917.2	-2.46500564495666	0.000982534712139613
chr19:1032392|1032696.2	-1.64613194487694	0.0240640269273822
chr19:11058255|11060187.1	-3.76565382767454	0.00914676424472611
chr19:14042453|14042789.2	-1.80934115475672	0.0387242936529883
chr19:14458031|14458375.2	-2.12287361767122	0.0372725619535075
chr19:17276495|17276909.2	-1.56678750142773	0.0341061315837869
chr19:18075749|18076327.1	-3.24976308205143	0.0249939964699913
chr19:18175040|18175697.2	-1.70108990784685	0.0463422906369722
chr19:18537601|18538436.2	-1.81552875217858	0.0263737384800416
chr19:18539371|18539720.2	-1.66944090802177	0.0238767141512815
chr19:19296989|19297344.2	-2.29659577377293	0.0442881797021574
chr19:19492306|19492712.2	-1.99001546928606	0.0307128594054353
chr19:20645684|20646405.2	-2.93286931480476	0.000255159127581499
chr19:21033456|21034184.2	-1.47641256371529	0.039738807086372
chr19:21405129|21405856.2	-1.75994323741107	0.0202258860943552
chr19:22072809|22073564.2	-2.73258780355746	0.000819687258981425
chr19:29985223|29986417.2	-1.4814826158499	0.0402853252045404
chr19:34221507|34221738.2	-2.78872308119626	0.0346756063939446
chr19:34430576|34434968.2	-2.05407075449454	0.0113088829139049
chr19:39453356|39453521.2	-1.83571980755302	0.044240312801675
chr19:40583398|40583717.2	-1.6217768491557	0.0237909004304805
chr19:47362476|47362693.2	-1.79000948932517	0.0458379879415515
chr19:5039836|5047669.2	-3.00486427009179	0.0195466425765597
chr19:54909245|54910065.2	4.40507594444805	0.0228535933877325
chr19:5604583|5604936.2	-1.94283000810185	0.00734865591605204
chr2:147972739|147975975.2	-2.66869447154907	0.000424297759119319
chr2:161367478|161395203.1	-3.34217980481714	0.0226875825906293
chr2:172586278|172596023.1	-3.32719256344876	0.0229952434822799
chr2:196139620|196146055.2	-1.85467024020461	0.027008639553941
chr2:199368605|199433514.2	4.1725614195073	0.0347908646413772
chr2:201145378|201149835.2	-2.28461247318612	0.00179780364280358
chr2:202297379|202297906.2	-2.17811464231996	0.0104615418179997
chr2:207724800|207742342.2	4.19361014310139	0.0336227427098082
chr2:230357805|230361697.2	2.10064217907588	0.0090135762539803
chr2:233388257|233398449.2	4.66110410264299	0.0127299670338286
chr2:26364302|26373629.2	-2.05059096134549	0.0129113379321852
chr2:37019809|37020836.2	-2.35858524810273	0.0397452694680618
chr2:37316237|37317179.2	-2.65339399736735	0.000635409256681614
chr2:39331917|39337581.2	4.05276519993813	0.0426929941660504
chr2:44209210|44218537.2	-1.95917494057903	0.0213519159465265
chr2:47005922|47011435.1	-3.32719256344876	0.0229952434822799
chr2:48498493|48511468.1	-3.03306725685249	0.040638872389534
chr2:53887259|53893799.2	-3.25454681911058	0.0233118218197536
chr2:55025086|55028220.2	-2.95651174399228	0.02798340188693
chr2:63433745|63439871.2	-3.09551136986211	0.011361026496969
chr2:63856306|63857936.2	-2.26466656264467	0.00939336636843225
chr2:68490190|68513680.2	-2.83156623235582	0.00550314121489477
chr2:71355719|71370005.1	-3.43569979090966	0.0204987641558147
chr2:71396141|71418639.2	-1.78212757525123	0.0146282405449911
chr2:72718103|72733118.2	-1.95053762603913	0.00768575219194655
chr2:84870225|84870785.2	-3.77767656072068	9.92907577623187e-05
chr2:85861181|85863485.2	-2.90066563983364	0.0026024481629068
chr2:86159536|86162079.2	-2.86431111457745	0.0446630084188055
chr20:21339044|21344208.2	-2.29811395832999	0.0184560799280519
chr20:32366384|32371874.2	-1.79447529871053	0.0253146060956966
chr20:32474601|32527913	-3.34217980481714	0.0226875825906293
chr20:33619517|33623296.2	-2.0975103801997	0.00572995963072438
chr20:51473980|51524110.1	-3.38513555863338	0.0216357283333476
chr20:51516784|51523596.2	-2.65813917285755	0.0152433197381493
chr20:54157169|54171670.2	4.14620175010618	0.0362421855978874
chr20:62854016|62860308.1	-4.33804965433928	0.00294920047175305
chr20:63775678|63790790.1	-3.82380775085011	0.00844464671008783
chr21:36247517|36248568.2	-2.7934752162799	0.000538254584318632
chr21:36338774|36344707.2	5.57432505323456	0.00133740380491037
chr21:36338779|36344707.2	-1.73572249676436	0.016277006832235
chr21:37420299|37421866.2	-2.37850467025328	0.00145875083149376
chr21:44077693|44080127.1	-3.37720968447187	0.0195810476344064
chr21:44855210|44861271.2	-1.52166271059466	0.0414356965136961
chr21:46643535|46644488.2	-2.58846386514582	0.0176183878996813
chr22:31602212|31602785.2	-2.54106662376935	0.0086259596318035
chr22:31725538|31738911.1	-3.34217980481714	0.0226875825906293
chr22:32478981|32479275.2	-2.35335792619615	0.00160898009278398
chr22:36341370|36349255.2	-3.07223699402232	0.00646336438629713
chr22:41338313|41339191.2	-2.20644155976597	0.047295376208325
chr22:41808875|41810291.2	-2.42085034628572	0.0117234034996935
chr22:49797805|49799119.2	-2.03769184929905	0.010883199112233
chr3:101267511|101304312.1	-4.73006251592597	0.00102095935602328
chr3:119503532|119513719.1	-4.9833228807379	0.000320075331453538
chr3:119503532|119517315.2	-1.89734835109195	0.0320866334389559
chr3:123931102|123949132.2	4.51263833434329	0.0188341181367341
chr3:128262128|128264781.2	-1.7977160724041	0.0440629159778821
chr3:128806372|128807671.2	-2.80990446627349	0.0338704763237507
chr3:129880309|129880559.2	-2.28994523052179	0.00401719351022931
chr3:138570318|138571356.2	5.75404833033541	0.000670171631368628
chr3:142425222|142426841.2	-1.90919108257284	0.0421221470132001
chr3:142736379|142748460.1	-2.95379287453274	0.0450344272110586
chr3:143795001|143832221.2	5.00422223226714	0.00596010971855464
chr3:149846011|149872154.2	-1.73396934265542	0.0279540098284525
chr3:152414941|152432920.2	-1.85840839634206	0.0170714040569656
chr3:15411245|15415942.2	-3.31877470730895	0.00221189452824847
chr3:16294856|16303592.2	-3.25454681911058	0.0233118218197536
chr3:179203544|179204588.2	-2.62367675148181	0.0032019888386386
chr3:183205876|183207823.2	4.44465146251192	0.0210334651446297
chr3:195381009|195392147.2	-1.70049988928893	0.0212132368300824
chr3:195878253|195888606.2	-2.66723806778279	0.0136559658225592
chr3:195959183|195960086.2	-2.30527097645417	0.049727501448213
chr3:196806579|196807914.2	-2.65535817174535	0.00285062774026074
chr3:19950806|19951061.2	4.17130174931757	0.0356720855570509
chr3:31576396|31580096.2	-2.61904507525583	0.000508952003139984
chr3:37383226|37386370.2	4.93099017253596	0.00729936722446571
chr3:43299754|43303792.2	-2.24096433416442	0.00290291647414194
chr3:4410865|4420146.2	4.20456737190283	0.0327129431252751
chr3:50113383|50114251.2	-2.56497854391162	0.0373205265647648
chr3:52412811|52414587.2	-1.56566842755209	0.0414945298629354
chr3:52737586|52741499.2	-2.66699181587994	0.00371592421249331
chr3:52926031|52928341.2	-2.30781771716112	0.0137271188881814
chr3:53874211|53876080.2	-2.42814226608094	0.0401580719343186
chr3:56563684|56567053.1	-3.29229135416694	0.0238853915181877
chr3:56627037|56628614.2	-2.39518311147194	0.00152193987980586
chr3:67400731|67409034.2	-3.87849756365785	0.00310118649737502
chr3:67495798|67508903.2	5.89875728307073	0.000394244300829848
chr3:71041328|71053773.2	-2.02066032872396	0.00678159813866343
chr4:102580535|102582957.2	-1.77697814094301	0.0274300757673739
chr4:104518577|104519454.2	5.11900460739105	7.35616707471319e-07
chr4:105446383|105456745.2	-1.8999090358362	0.038942418990108
chr4:109659011|109664394.2	-3.05158845621568	0.0013020920860184
chr4:127921524|127939997.2	-1.67903860651186	0.0345578646613815
chr4:127930683|127933093.1	-3.25418677473779	0.0241224162874048
chr4:142082031|142124760.1	-3.32719256344876	0.0229952434822799
chr4:143543509|143543972.2	-1.62039844085926	0.0377210198530322
chr4:146292929|146294095.1	-3.24976308205143	0.0249939964699913
chr4:15816511|15825016.2	-2.41898967322791	0.0482115957866633
chr4:165989381|166025431.2	4.71889792712313	0.0123857365468391
chr4:166039339|166078030.2	5.35161803112414	0.00249229422848206
chr4:166055076|166078030.2	4.31955313253358	0.0272275222322102
chr4:173384651|173403950.2	4.34952818590251	0.0260974601440694
chr4:185247294|185267155.2	-2.63484015615969	0.0117198272423225
chr4:2490337|2497121.1	-4.80810671206032	0.00065628611286693
chr4:37631385|37638504.2	-1.87598766559092	0.00956059864005107
chr4:39841948|39844801.1	-3.90225277024803	0.00758722660559454
chr4:42616033|42627109.2	4.26414767543792	0.0297901404666457
chr4:51863437|51877854.2	-1.92271462102578	0.0144464291269989
chr4:76124649|76144473.1	-3.34217980481714	0.0226875825906293
chr4:83308845|83310078.2	4.29608583380653	0.0281928989322419
chr4:86764593|86767976.1	-4.17000721763715	0.00130212414257728
chr5:103096541|103097781.2	-1.85806192536055	0.0140851555898867
chr5:10415488|10417404.2	-3.22524576688531	0.000616071420439683
chr5:1060344|1065478.2	-2.82188789514673	0.0137904712667154
chr5:109713520|109729513.2	-2.32489377807049	0.00267478517679111
chr5:137942875|137943216.2	-2.49796661867814	0.00746961828292295
chr5:139600372|139623461.2	-1.92333849254617	0.04794991433581
chr5:139614586|139623461.2	-2.78462545787648	0.0475465846368529
chr5:143054439|143057747.2	-1.64131994733408	0.0394293436538846
chr5:14673642|14693094.1	-3.24976308205143	0.0249939964699913
chr5:151790323|151791062.2	-2.00911594176508	0.0237847070704729
chr5:154033791|154034946.1	-3.43569979090966	0.0204987641558147
chr5:154033791|154034967.2	-1.66141002502138	0.0260376977552887
chr5:179705679|179710065.2	-1.88982749816022	0.0281752560805225
chr5:38990949|39003622.2	-2.71531079724507	0.00191162367245676
chr5:43675511|43677806.2	-1.53390511017339	0.0460532328044007
chr5:50274988|50411383.2	-2.29972350965745	0.0138437636808341
chr5:50750151|50763242.2	-2.45709150681695	0.00753138349161753
chr5:58988493|58993465.2	-2.06110641261567	0.0412418554472006
chr5:65567513|65572286.2	-2.78219513987086	0.000384596143658489
chr5:74715510|74716673.2	-2.50071932466914	0.0203916820553954
chr6:106583328|106602922.2	-3.03338534562192	0.0341467501720822
chr6:109475399|109476930.2	-3.7209330652337	0.00569043202723083
chr6:116692055|116726622.2	-2.48512546957575	0.0461739388919973
chr6:116698704|116705160.2	-1.82628910758257	0.0132443341555163
chr6:13579451|13584225.2	-1.79278521325181	0.0155977485318677
chr6:142820033|142837047.1	-3.33498010729747	0.022804172283749
chr6:144537582|144539443.2	-1.84228284703016	0.012926979850736
chr6:147205971|147239270.2	-1.92955916001946	0.0416009233583697
chr6:32519370|32580856.2	5.82536112339458	0.000748457231676544
chr6:32661967|32757883.2	4.88219575519869	0.00881521646933831
chr6:35312302|35312772.2	-1.66394598894772	0.037576827775057
chr6:35619096|35642843.2	-2.61489467245515	0.0478810483034184
chr6:43055545|43056445.2	-2.6312351429043	0.0157976736305798
chr6:70533160|70538401.1	-3.33498010729747	0.022804172283749
chr6:75702645|75703072.2	-2.39933184764859	0.00221197200388696
chr6:82214227|82214829.2	-1.82713434466165	0.0224284831382018
chr6:87215903|87233527.2	-2.47574530448775	0.045282616990744
chr6:89751431|89753622.2	-2.37168590349556	0.0158447252283484
chr6:90206569|90271941.2	-2.68622302140443	0.00663119941011989
chr7:100023419|100024307.2	-1.65133187724093	0.0213618923550421
chr7:102227367|102227669.2	-2.2680877752213	0.0107084537633771
chr7:114942275|114946213.1	-3.40864075596386	0.0185761825688367
chr7:114942275|114979781.2	-3.55358628092691	0.00873294846366133
chr7:128579999|128592017.2	-2.60810837385231	0.031810600474663
chr7:141636960|141649333.2	4.13122206986388	0.0367669031644837
chr7:155672867|155680908.2	-1.54395896250893	0.0327450807177191
chr7:17890363|17897446.2	-2.18392163367165	0.0472682414755714
chr7:2229984|2230724.1	-2.99011692039585	0.0429866944825083
chr7:22976210|22984045.2	-3.21160226498341	0.0079573331663123
chr7:24623666|24668660.2	-2.15614964487695	0.0186589040242317
chr7:24641716|24668660	-3.29229135416694	0.0238853915181877
chr7:27629371|27649633.2	-1.63371179417614	0.0393780352564661
chr7:27785163|27785489.2	-1.93481131014094	0.0131669445378234
chr7:39987599|39988258.2	4.16248263960558	0.0363584286266931
chr7:43639449|43640649.2	-2.65964981871397	0.00962135491468805
chr7:44645327|44647759.2	4.29306375140915	0.0281389734586923
chr7:50319048|50327757.2	-2.45954646438607	0.000990691004623765
chr7:55982210|55984878.1	-3.29229135416694	0.0238853915181877
chr7:5641154|5652510.2	2.25789205616337	0.0449244892792651
chr7:64336259|64336982.2	-2.90673971781689	0.00712177553123095
chr7:6814764|6822364.2	-3.17601597762575	0.00252137860288453
chr7:6814764|6823360.2	4.39780915538122	0.0227372533208923
chr7:90726567|90790652.1	-3.34217980481714	0.0226875825906293
chr7:92294889|92307656.2	-2.01977629281376	0.0156507870428607
chr7:99403398|99404953.1	-3.82380775085011	0.00844464671008783
chr8:103430612|103435790.2	-2.80861045046381	0.0346534323202256
chr8:115587001|115623758.1	-4.41248998697484	0.00261251471704281
chr8:131940499|131946633.2	-2.09302877589605	0.0134607921407086
chr8:132722040|132757294.2	-1.90626186844013	0.0337567302164757
chr8:134812610|134813169.2	-1.90399853928907	0.0481493542673448
chr8:2492872|2494091.2	4.09076339070377	0.0419195158779852
chr8:37765526|37766355.2	-1.87635429532568	0.00946242029883016
chr8:42325970|42329214.2	-1.71550945429439	0.0301439127218966
chr8:51860845|51861246.2	-1.89683905821674	0.0112520535763173
chr8:51860861|51861246.2	-3.1013837490705	0.00441842784761832
chr8:66601698|66602523.2	-1.84519444652873	0.0474110281444686
chr8:668598|674047.2	-3.45685888996771	0.000354914820196779
chr8:67118248|67137603.2	-2.51921397066417	0.00558313884208811
chr8:70159505|70162854.2	-1.82469219160417	0.0176569564872036
chr8:98706467|98707311.2	-2.76365840368371	0.00213466967019213
chr9:109050283|109064567.2	-3.47494603139267	0.009965849971193
chr9:109106508|109108570.2	-2.36110244982826	0.00204157949323792
chr9:110972073|110973558.2	-2.41083771362113	0.0148667674516206
chr9:123757703|123769563.2	-3.51786088701948	0.00180430109251074
chr9:125657651|125672643.2	-1.77096245370846	0.0472029039790095
chr9:131506114|131506453.2	-2.36625360853121	0.00142507848447833
chr9:135881633|135883078.2	-1.73453495744639	0.0160056462161796
chr9:20923660|20933103.1	-3.25418677473779	0.0241224162874048
chr9:31180095|31235419.2	4.4083748425854	0.0229827002294057
chr9:31230549|31235419.2	4.66555101023794	0.013685250445993
chr9:31233747|31235419.2	5.88578529413939	0.000791769078331586
chr9:37126312|37147445.2	-2.07637777125203	0.00621120061488771
chr9:37768076|37770739.1	-4.22708990898038	0.00352153890895708
chr9:4860125|4860901.2	4.24731359255781	0.0304040877587167
chr9:5968019|5988545.2	-1.79542837464895	0.0376264375871092
chr9:71740063|71740232.2	-2.36416544292638	0.0135038407430751
chr9:75016268|75017448.2	-2.57459467012885	0.00429489560649102
chr9:77214329|77227485.2	5.00389882071629	0.00592844426917259
chr9:83678441|83683066.2	-2.96111213372227	0.0143705426930827
chr9:83678441|83686155.2	-1.65028561816793	0.0426475433675245
chr9:83679775|83686155.2	-2.11877529526669	0.0101145283625408
chr9:83682951|83686155.2	-1.64212078935338	0.0268615538443532
chr9:96458379|96458541.2	-1.96981318355752	0.0169409519640805
chr9:97994631|97998678.2	4.02834593434056	0.0421384936806116
chrX:101041317|101042312.2	-1.77842996318246	0.0245205400027729
chrX:118542725|118546116.2	-1.78935207381796	0.0260774920838245
chrX:1285778|1290509.2	-1.81827635017864	0.0360215319024137
chrX:132281095|132283032.2	5.66048939400051	0.000968406540887322
chrX:150592605|150619139.2	-2.05390102518348	0.0362718152859739
chrX:150736595|150737448.2	-2.40298776524639	0.0252502310577058
chrX:24172715|24179770.2	-1.98503616245529	0.0331607098192099
chrX:51327721|51357027.2	-2.16167940649576	0.00374702291387296
chrX:65051462|65107023.2	4.26483925961552	0.0304918388680722
chrX:65075474|65075912.2	-2.84103773670171	0.00307628819322531
chrX:85303406|85308216.2	4.92880753160257	0.00728985648734766
chrY:2953909|2961646.2	-2.28251943323907	0.00272820282509435
chr1:103565435|103575540.3	-3.48925870370251	0.00194648805358505
chr1:108148279|108161293.3	-2.37533860863329	0.0106821683683138
chr1:110891392|110892533.3	-2.04050493960296	0.00926328332930575
chr1:111147642|111161296.3	-1.80771437986485	0.0479165863255882
chr1:11121246|11122126.1	-3.31941201572322	0.0231871650683511
chr1:112653598|112667145.3	-2.50180068401386	0.0317256360220717
chr1:116760402|116764606.1	-3.33498010729747	0.022804172283749
chr1:13769118|13782831	-3.31941201572322	0.0231871650683511
chr1:150440923|150446401.3	-2.7186655764492	0.0165177317910667
chr1:151117392|151118139.2	-3.30562757069021	0.0175444508958838
chr1:151166934|151167414.3	-2.27374745597291	0.0022140513786141
chr1:151172268|151173615.1	-4.51750221317135	0.00165573574921577
chr1:151242123|151242567.2	-3.24976308205143	0.0249939964699913
chr1:153667555|153668557.1	-3.8798071510219	0.0078360488988796
chr1:154234591|154235291.3	-2.42152273576575	0.0247795519150479
chr1:155349327|155349596.1	-3.38513555863338	0.0216357283333476
chr1:155378281|155380116.2	-3.80130603254628	0.00871357569502095
chr1:155674685|155675096.1	-3.95831097520513	0.00702355518855037
chr1:155675010|155679512.3	-2.7029834699034	0.00145712764750486
chr1:155675010|155680456.2	-2.81625499228113	0.0253594490930925
chr1:155676548|155679512.3	-2.30959839967011	0.00229226472859964
chr1:155725382|155726019.3	-1.72530322606318	0.0234149254269413
chr1:155853276|155853806.3	-1.42930049633259	0.0452212695898021
chr1:15638307|15643650.3	-2.13009172577408	0.023617662456726
chr1:160619776|160624185	-4.80216872730566	0.000665068717111214
chr1:1669664|1734835.1	-5.74024955270911	6.2570080903379e-06
chr1:175986943|175989479.2	-3.16493591888588	0.00929770591149014
chr1:176116624|176136547.3	-2.95837575307782	0.020782181836921
chr1:176149006|176176007.1	-3.80130603254628	0.00871357569502095
chr1:179347600|179350431.2	-2.41665251369301	0.0493588478744068
chr1:180062220|180065272.1	-4.77754855558884	0.000711570026528109
chr1:180078463|180080661.1	-3.38513555863338	0.0216357283333476
chr1:186318447|186318828.2	-2.47939929754139	0.0357354397000653
chr1:193135391|193138173.1	-3.43569979090966	0.0204987641558147
chr1:194159280|194167715.2	-4.3466019683334	0.000689816239745638
chr1:197583152|197611976.2	-3.08362358691136	0.0230720091091801
chr1:197642711|197658369.3	-2.42952159230906	0.00536966593610648
chr1:197652235|197715074.1	-3.34217980481714	0.0226875825906293
chr1:202150311|202152699.1	-3.24976308205143	0.0249939964699913
chr1:202157739|202158301.2	-4.57854411008357	0.00145043233082189
chr1:205616478|205623891.3	-1.41217776242809	0.0495189061597198
chr1:212342188|212347406.2	-3.29229135416694	0.0238853915181877
chr1:22078429|22091501.3	-2.91878278767624	0.0115322338753405
chr1:223954477|223962273.3	-2.43026128875402	0.0474597867244362
chr1:23030469|23050520.3	-1.82990040365728	0.0134333787716672
chr1:231537213|231542611.3	-1.74215224106065	0.0363665760252652
chr1:231795242|231818517.3	-2.10255305555435	0.00909203480651295
chr1:233090061|233095863.3	-2.71849468887933	0.0079259505178542
chr1:233135013|233161363.1	-3.29229135416694	0.0238853915181877
chr1:233198939|233208689.2	-4.63681831596313	0.00126884994477323
chr1:233217899|233227371.3	-2.56250905312502	0.00494118163483112
chr1:233227226|233236980.1	-3.76565382767454	0.00914676424472611
chr1:235773842|235787373.1	-3.80130603254628	0.00871357569502095
chr1:23814190|23820593.2	-2.72382963026167	0.00986550820842706
chr1:24169417|24180854.2	-3.32719256344876	0.0229952434822799
chr1:243695591|243843282.3	-2.05492615463016	0.0478272412487451
chr1:244843135|244848856.3	-2.4916743050193	0.0443123465405344
chr1:245002121|245059458.1	-4.25190381165361	0.00338115132211466
chr1:246437148|246440124.1	-3.24976308205143	0.0249939964699913
chr1:247157000|247159813.3	-3.34275839713656	0.00296644154710626
chr1:25242374|25243633.2	-3.10275199057994	0.00364095258582766
chr1:26446316|26447660.3	-1.86506639615545	0.0183841429908139
chr1:26453609|26463433.2	-4.760356362852	0.000750602604786646
chr1:28473554|28480604.2	-3.34217980481714	0.0226875825906293
chr1:29035826|29053312.1	-3.2845376028535	0.0240812885704243
chr1:29154696|29154910.3	-3.27938930606849	0.000437526218089965
chr1:31915895|31919658.3	-2.88199686985985	0.000197159560627766
chr1:32279671|32280210.3	-1.97766780501414	0.00834332420598843
chr1:32631827|32634792.3	-1.58659552100737	0.0480968108787978
chr1:35831427|35835993.2	-3.90225277024803	0.00758722660559454
chr1:35966955|35973511.1	-3.24976308205143	0.0249939964699913
chr1:41070595|41075451.3	-1.69479765793197	0.0197556885311479
chr1:42227883|42323827	-3.76565382767454	0.00914676424472611
chr1:48355670|48359770	-4.66703269382408	0.00118056963405813
chr1:51827796|51834170.3	-1.72581620329205	0.0397413856355742
chr1:52477708|52489035.1	-3.32719256344876	0.0229952434822799
chr1:52493611|52509712.3	-1.91947672524445	0.0128617016341673
chr1:58506060|58534331.3	-2.03940372276049	0.0372812156864184
chr1:58506060|58536741.3	-2.01969765750065	0.00928011095635985
chr1:58527261|58536741.3	-2.46267683733416	0.0460101253738856
chr1:66891154|66905375.3	-2.10779626421464	0.00595719971312644
chr1:805799|810170.3	-1.73823301949792	0.0187390353985535
chr1:8614561|8656441.2	-3.34217980481714	0.0226875825906293
chr1:92333391|92380873.3	-1.47215781514599	0.045185996333455
chr1:92605307|92636336.2	-2.95454931684257	0.0451065012188231
chr1:97515726|97549744.2	-1.97952966427133	0.0280522162924566
chr10:100260218|100262063.3	-2.09743380901495	0.0286569348406418
chr10:101939863|101957732.3	-1.86261015422827	0.0390709881303282
chr10:101975212|101995355.1	-3.29229135416694	0.0238853915181877
chr10:103622470|103661114.2	-3.43569979090966	0.0204987641558147
chr10:110124017|110126503.1	-3.95831097520513	0.00702355518855037
chr10:110124017|110130486.2	-3.33429813369365	0.00101309789816648
chr10:114970368|114974385.2	-2.06406786525844	0.0178115361470763
chr10:11997672|12014184.3	-2.10227462791469	0.00693821583678464
chr10:124706636|124706887.3	-3.54313728064361	0.00131135219440772
chr10:130079566|130079901.1	-3.31941201572322	0.0231871650683511
chr10:130166507|130171636.3	-3.07812783090682	0.0110829867123479
chr10:14520977|14530515.2	-3.37729385129918	0.0218216252431408
chr10:15833630|15847943.3	-1.58491181897552	0.0336289307047394
chr10:16752539|16782084.3	2.01390427122711	0.0336070469415103
chr10:18609845|18616293.1	-2.91823172845095	0.0472234790987748
chr10:21904522|21920963.1	-2.91823172845095	0.0472234790987748
chr10:26500819|26513660.3	-2.14927082685592	0.049490823621903
chr10:27142387|27145590.3	-2.06545359256839	0.0065977295285865
chr10:27180953|27181581.1	-3.76565382767454	0.00914676424472611
chr10:32034690|32037607.2	-2.98472175954208	0.0365699163017232
chr10:32565558|32584304.3	-1.51945787872356	0.0345387568645453
chr10:45457785|45464327.1	-3.24976308205143	0.0249939964699913
[truncated: 663 more rows]

## Sheet: DCE_ATLdiag_Acute_vs_Donor_sig
	logFC	PValue
chr1:100439932|100468094	-2.86551628491717	0.0186230193440341
chr1:103565435|103575540	-2.69833731634574	0.00359792334399211
chr1:108148279|108161293	-2.7109033785774	0.00151494544244936
chr1:108752257|108760085	-2.36054013409468	0.0353569178029485
chr1:110891392|110892533	-2.27882558899681	0.00222752421806803
chr1:113829592|113834439	-1.74672484769354	0.0148053088045202
chr1:113848540|113855049	-1.72991637942424	0.0245853896237568
chr1:117402186|117405645	-1.55707914957831	0.0267833871102929
chr1:150230571|150231926	-1.95207515642323	0.0304848501253903
chr1:151024611|151027327	-2.38722806883883	0.0256032569851265
chr1:151166934|151167414	-1.93219895868719	0.00587309592845031
chr1:154234591|154235291	-2.3906311782649	0.0114720755965907
chr1:155521100|155521618	-1.56263020980963	0.0478983319072438
chr1:155675010|155680456	-2.38902509871168	0.0246521990857194
chr1:155853276|155853806	-1.58507600122022	0.0213730045518485
chr1:160323431|160332557	5.13756845974845	0.0141774642075203
chr1:171568247|171575128	-1.91933236175468	0.0173980892793958
chr1:172131175|172182896	-3.09590201465798	0.0209176013304472
chr1:174272414|174394145	5.28030078221092	0.010720076173821
chr1:175986943|175989479	-1.97793332784712	0.0466663280303282
chr1:179342114|179343635	-2.4212963631557	0.0424507966473936
chr1:179347600|179350431	-2.49545298475958	0.0203156358793682
chr1:197583152|197611976	-2.23997292151045	0.0454983956820036
chr1:197642711|197658369	-3.08134329736223	0.000151990418726195
chr1:203770828|203772147	4.38051116112465	0.0490281327848583
chr1:205616478|205623891	-1.41461826438567	0.0420476255490498
chr1:205618957|205623891	-3.35873057852264	0.0162926772894289
chr1:20770930|20773610	-1.64906809340031	0.0189802062856507
chr1:20969474|20981227	-2.16570293505638	0.025811521738269
chr1:211778918|211793190	-1.64370289184022	0.0401942111971585
chr1:211783229|211793190	-3.65064502302404	0.00598236882403357
chr1:213117317|213129889	-2.00227917535831	0.0457508782547415
chr1:21721036|21721764	-1.87860062794586	0.0486647361567749
chr1:22078429|22086866	-1.96961380071466	0.0293478327291008
chr1:22078429|22091501	-2.05680801978383	0.0319496879996172
chr1:223954477|223962273	-3.03006044035157	0.00581783521896543
chr1:2302978|2304585	-4.18159823012028	4.29719578864785e-10
chr1:23030469|23050520	-1.77643163275928	0.0136414836688089
chr1:231795242|231818517	-1.57274930343729	0.0392661574252119
chr1:233090061|233095863	-1.92107494048019	0.0278310862625055
chr1:233198939|233218184	-2.93103750427528	0.0106150419187842
chr1:233217899|233227371	-1.69244203309805	0.0346586867846895
chr1:235780865|235782087	-2.44575805009518	0.0126242418235648
chr1:243695591|243843282	-1.94134163903522	0.0368623564597834
chr1:245002121|245017326	-2.86895765610718	0.0118534045551046
chr1:24514314|24514567	-1.88539232953347	0.00485982526652944
chr1:25242374|25243633	-3.16174472842399	0.000602586485674916
chr1:26942660|26943065	-1.66587321226455	0.0243622613999575
chr1:33294937|33295305	-1.60410764232978	0.0369379170474669
chr1:35358925|35361789	-1.4657458166806	0.0374017466952839
chr1:36358239|36362656	-3.79401269642841	0.00244244463799073
chr1:39853970|39857417	-2.06148687982931	0.0228764426051686
chr1:40189055|40202614	4.97229201482913	0.0193181321507374
chr1:41070595|41075451	-1.58002795550126	0.0242788659144765
chr1:42265115|42323827	-3.38913653675666	0.00596077510673169
chr1:42278348|42311110	-3.65943680485278	0.00587382070225039
chr1:44319628|44339322	-2.98801779367902	0.0374625510185654
chr1:44411981|44412722	4.50364125452718	0.0413415979809387
chr1:51402435|51408332	2.18832438370911	0.0425254075833638
chr1:52477708|52481923	-1.94220768976759	0.0276128394558617
chr1:58506060|58534331	-1.77313956094714	0.0422036117984151
chr1:805799|810170	-1.79775831850619	0.00753641405216308
chr1:88740988|88741288	-2.89520393177538	0.00780214403192041
chr1:91861471|91864279	-2.66396647787883	0.00963185974954103
chr1:97515726|97549744	-3.66156216880881	3.23514280858162e-05
chr10:100260218|100262063	-1.78275209715169	0.0372747078910547
chr10:101939863|101957732	-2.06951404513955	0.0129831363022291
chr10:102654653|102656385	-3.27793005475834	0.00299334155974914
chr10:103900062|103910622	-3.3138247270167	0.0168539051633312
chr10:104008177|104018908	-2.01346913858571	0.0126204203029638
chr10:1080011|1080476	-2.16236160067332	0.0399944748443698
chr10:114970368|114974385	-2.54200238462491	0.00169948001999995
chr10:11997672|12014184	-1.71040900776867	0.0204979779638328
chr10:12235048|12238485	-2.50531503705643	0.026672186275011
chr10:124681607|124696212	4.43512242387031	0.0457959281406117
chr10:130166507|130171636	-2.31025551167507	0.021750495375593
chr10:131308211|131309299	4.72213556583867	0.0292652973295711
chr10:15816835|15847943	-1.48345677596795	0.0412579790579755
chr10:15833630|15847943	-1.52843421903873	0.0354689788973497
chr10:21882282|21920963	4.41579066511649	0.046960298382593
chr10:26500819|26503274	-1.91704552655556	0.0374139367024284
chr10:27142387|27145590	-1.97516406030404	0.00676978623707344
chr10:28147483|28150059	-3.91721881732572	0.00151937325687285
chr10:4830675|4909606	-2.88400392823606	0.00823749514979665
chr10:48401612|48410168	-2.02567985727289	0.00767499930950504
chr10:60084602|60085253	-2.71486114155811	0.00492614693547297
chr10:62198283|62239765	4.96798701554269	0.0193366866602706
chr10:68771206|68771445	-3.61714979304533	0.00627904427432213
chr10:72708283|72715902	-1.67300558023237	0.0373620196753984
chr10:7276892|7285954	-2.42406852592161	0.000384245992871021
chr10:84417771|84425893	-1.52880939292081	0.02583388419549
chr10:84425731|84477664	-2.92469831248096	0.0238239016296762
chr10:84438512|84477664	-1.98584943155183	0.00676912837549214
chr10:863743|885760	-2.86237362305069	0.0123976040203001
chr10:88893871|88905660	-3.63633532087501	0.000287349780306678
chr10:93381219|93389154	5.42906528815235	0.00799595224478813
chr10:97436417|97437750	-1.43125226439103	0.0413827331770482
chr11:108046270|108054955	4.47529146613019	0.0429630606692617
chr11:108176246|108177090	-2.09677228871262	0.00211483018635827
chr11:108227595|108229323	-2.27189124607464	0.000838857154114578
chr11:108227595|108247127	-2.3717747253789	0.0472073455207552
chr11:108235670|108245026	-2.320404583807	0.00667763722920624
chr11:108258986|108267342	-2.02883062202001	0.0249833724169234
chr11:108267171|108267342	-2.7812565798679	2.8348526042949e-05
chr11:108327645|108332037	-2.53125866473444	0.0064728259031754
chr11:108329021|108332037	-1.82203926847788	0.0364415753184092
chr11:116863668|116873636	-2.56291905244264	0.0482800851200212
chr11:118210487|118214886	-4.43907103957601	0.000320115537331359
chr11:120406118|120409450	-2.77679862721322	0.0212335836141207
chr11:128768118|128772985	-2.69846161754426	0.00179686601510998
chr11:17878208|18010139	-2.20411606389892	0.0297835687137088
chr11:17959470|18008076	-2.59112106750842	0.0450573041968048
chr11:2768844|2778037	-4.06297928823222	0.000189277747844066
chr11:34089395|34092056	-2.19982625655501	0.029279822836044
chr11:34957384|34978182	-2.36170733825368	0.00483074643607475
chr11:3768581|3768744	-2.5238034533608	0.0135741198872542
chr11:47358844|47360040	-3.48350482464824	0.0132944952377271
chr11:47358844|47375729	-2.19882885638336	0.0368996210321642
chr11:47358844|47375732	-2.5753194203495	0.0483832452749585
chr11:57491224|57491862	-1.70482662130498	0.0499491875419925
chr11:581492|582081	-4.6413510207938	4.62480460911098e-05
chr11:66238804|66239277	-2.56202414924534	0.00959622240660899
chr11:66639700|66640123	-2.25734979260941	0.00101975172505553
chr11:68551121|68564432	-1.83857109398243	0.0356614850530329
chr11:68567014|68576043	-1.62302110289973	0.0407512408605314
chr11:73707420|73718718	-1.58554872388154	0.0258270336534705
chr11:73707420|73718890	-1.78371923431866	0.0335519047513835
chr11:74859158|74863021	-2.48565176171745	0.0383315525856942
chr11:77619606|77625818	-1.59861700756156	0.025567074948282
chr11:77683710|77693611	-1.87630036363919	0.00664735227976948
chr11:77691159|77693611	-2.45757869442292	0.00778539283614002
chr11:77722688|77725699	-1.96582532606744	0.0404623328607352
chr11:83111113|83117197	-2.89105733006976	0.00389408265914528
chr11:85974708|85981228	-3.40427901141045	0.0148749342765531
chr11:85981745|85982003	-2.96588927915155	0.0142593543069114
chr11:86022367|86031611	-1.57724929490306	0.0307243401354928
chr11:95184420|95193522	-3.46018076593954	0.00945262467949399
chr12:112502144|112506422	4.90877207353915	0.0214265125000996
chr12:116230433|116237705	-1.67029469763854	0.0350078926916626
chr12:116230533|116237705	-1.55755801876043	0.0234769414085203
chr12:120557282|120557682	-3.2950351265927	8.24115549971033e-06
chr12:120782655|120784593	-2.11534275003425	0.00226203700144053
chr12:121780872|121781192	-1.49007497835401	0.0396033822545139
chr12:122340753|122341697	-1.56409713800047	0.0403467111143917
chr12:12244262|12244655	-2.87317984566601	0.0174344508819389
chr12:122511109|122515227	-1.73541130734909	0.0418127869200375
chr12:12635777|12635974	-1.87045417277927	0.0448386506349968
chr12:128808788|128815070	-2.33911288568083	0.0364603235997481
chr12:1289852|1290012	-2.65637858000135	0.0140275958839309
chr12:132508153|132508350	-5.51898217612709	2.29623577332085e-07
chr12:132714858|132718120	-2.33265539031753	0.0297488235515977
chr12:2681654|2682612	-3.08576586305138	0.00153492116215911
chr12:2820086|2821792	-1.88242985605021	0.0136381975386434
chr12:28225795|28226199	-2.29580394878011	0.039949498909994
chr12:32607957|32611283	4.77200226676396	0.0269455711245998
chr12:42210355|42210619	-2.63570021115146	0.00562355114988522
chr12:42210355|42212484	-2.19316638649962	0.0237245263817711
chr12:42374863|42398994	-2.32178051386267	0.0288531366202108
chr12:42384940|42398994	-2.11722203402021	0.0226613501036111
chr12:44143525|44211387	-3.05505568403942	0.0343395116815445
chr12:46239679|46243314	-1.43654139412108	0.0384786868848537
chr12:46239679|46254936	-1.69276558682797	0.0255679386355273
chr12:47104113|47108164	-4.16501478829909	1.23616626910528e-09
chr12:50427762|50430570	-1.92582546332591	0.0444850033401635
chr12:51055835|51056502	-3.1711871472314	0.000792711719851032
chr12:51240343|51241116	-2.08964724065099	0.0471298024722013
chr12:56670275|56673065	5.25702407710102	0.0112356612745832
chr12:57395749|57398198	-1.88944048610153	0.0221336610113882
chr12:64648537|64649552	-3.08212793071379	0.000122317467952178
chr12:64864668|64866903	5.69875514792173	0.00442112451321111
chr12:66145841|66153448	-2.51141721184198	0.0358480276163119
chr12:89459638|89472275	-2.23470181985952	0.00765594565498846
chr12:92798892|92802734	-2.92469831248096	0.0238239016296762
chr12:94169153|94186473	-2.03408657309754	0.0128850706154019
chr12:98527886|98537572	5.14852762005239	0.0138504244257607
chr13:102622877|102627924	-2.08913799502284	0.0122950926939913
chr13:108243532|108251316	-2.30591156693449	0.023277869642774
chr13:113999585|114000932	-3.73338265598129	0.000221558211880669
chr13:114041000|114073837	-1.97005289529247	0.0159628798028802
chr13:114052052|114057474	-2.43515513109543	0.00831162459266967
chr13:114052052|114073837	-3.33203339890631	0.00399854690074531
chr13:114147992|114148962	6.84429959610944	0.000245298365798982
chr13:27427092|27430621	-2.35360209103682	0.0103801436778991
chr13:28256292|28261458	-1.82835112635021	0.0264682496836171
chr13:31941308|31946181	-3.07357416641214	0.00319829676311849
chr13:32732101|32735330	-2.18890112545728	0.00869207396413287
chr13:37040405|37051583	-2.16866424854849	0.0091811658873194
chr13:40826506|40855815	-2.15543275475587	0.0181395999621851
chr13:40836597|40855815	-2.12841829808185	0.0272214166187632
chr13:40942952|40943925	-2.97836378580014	0.00093621136519217
chr13:42953948|42970670	1.74449676389192	0.0477443534594191
chr13:45336536|45337388	-2.26451006232876	0.0409831361210158
chr13:45516143|45525051	-2.92622987298184	0.00188436031946198
chr13:45516143|45530780	-3.16800119441341	0.00045798515812959
chr13:49451553|49451909	-2.06853726295496	0.00357983889925749
chr13:50927407|50949505	-1.72893385529738	0.0121346239834156
chr13:50927407|50960171	-2.7862628297924	0.00715135595790162
chr13:77719532|77753358	-1.90504947847352	0.0117801381153451
chr13:95832927|95837202	-3.27763924687264	0.0076412665863568
chr13:99071510|99072508	-2.73333897596847	0.0236840815130851
chr13:99238427|99244624	-3.03571939955753	1.30913324813425e-05
chr13:99243832|99244624	-2.04258575585391	0.0420997577788287
chr14:102040236|102040673	-1.48814896087885	0.0317727716885747
chr14:102193463|102195120	-2.33641620025998	0.00371209802835764
chr14:22909483|22911403	-1.54274837171706	0.0233989714657302
chr14:24209890|24211829	-2.14499134579426	0.0419801042340395
chr14:30670256|30675065	-1.79164286120015	0.0204961817763264
chr14:34862044|34862322	-1.47325356113358	0.0379827343235846
chr14:35126735|35127611	-2.62898172271261	0.00297664007707392
chr14:39154211|39158402	-3.34822528143407	0.00251202618597823
chr14:39158285|39159550	-3.17056298423182	0.00254061690690024
chr14:39276934|39279537	-1.8353931993773	0.00914547054022223
chr14:45118028|45130790	-1.67475013949168	0.0149084692146576
chr14:50148285|50150230	-3.70514630764839	0.0053591528058778
chr14:50150008|50150230	-1.65511987101265	0.0286828678278905
chr14:52511240|52544371	-1.76378615414816	0.0386962087003312
chr14:54702062|54702580	-2.92469831248096	0.0238239016296762
chr14:60149353|60153178	-3.96586118916381	0.000252624033518193
chr14:61721509|61721823	-2.28431385264984	0.00496448955459815
chr14:61744705|61745817	-2.67736904318051	0.0398042337593615
chr14:64354721|64357503	-3.09590201465798	0.0209176013304472
chr14:65561337|65629606	5.18455743560419	0.0129938052484252
chr14:65615978|65629606	2.99594623842792	0.0241035773741196
chr14:67685015|67690421	4.38749761505676	0.0486750088572964
chr14:71413948|71418196	-2.84902615775658	5.63157539353881e-05
chr14:71413948|71467247	-2.2149104875956	0.0367594249926871
chr14:71413948|71529370	-2.30988516474831	0.00454431366850073
chr14:73736998|73737297	-3.55408038052033	0.0120706260077396
chr14:75109685|75110371	-1.78048174224266	0.013120586150064
chr14:76166663|76180849	-2.07438493027844	0.0222227994714186
chr14:80743075|80761613	6.4420712564569	0.000779099561510997
chr14:80743075|80778046	2.10136467967688	0.0401981359297874
chr14:85978970|86070967	-3.61731226346158	0.00190145151818926
chr14:86028369|86041833	-2.331093818031	0.00636744248904847
chr14:89161701|89162969	-2.67577655250347	0.00129339552161664
chr14:89411934|89412490	-2.19463810132287	0.0156704222928429
chr14:91338005|91343657	-2.09269664163755	0.0300983688453942
chr14:91342380|91343657	-2.75036895449231	0.000442541949078467
chr14:91797785|91802421	-1.97474702649981	0.0238530970549313
chr14:99231345|99257836	-2.61388400004255	0.0050494758901942
chr14:99231345|99257839	-2.73766463782094	0.000999367567213574
chr14:99257471|99257836	-2.67757948087501	4.21828048307902e-05
chr14:99257471|99257839	-2.69624509614348	3.1373456977975e-05
chr14:99458279|99465813	-1.75911367900237	0.00887000009857516
chr15:100330889|100334180	-3.57460032454147	2.17097903383206e-05
chr15:100564692|100565265	-1.40332198885367	0.0428279585284847
chr15:100564692|100566453	-3.70990935291948	0.00156362004587685
chr15:101235082|101235577	-1.64941646961494	0.0406356781641938
chr15:22278818|22282869	5.19369026095486	0.0127124927591673
chr15:23008699|23010133	-3.23939764480529	0.00838186025890239
chr15:25354353|25360527	-3.74171528668105	0.000836892067496408
chr15:25405461|25411971	-1.40961568782345	0.0396653465353694
chr15:30474356|30484686	-3.74079399328234	0.000230752652117419
chr15:41085369|41087682	-2.0229692551377	0.0351452741494972
chr15:42827928|42840433	-1.87205004185664	0.0263333748106237
chr15:44331988|44338317	-1.71070777584639	0.0186710634770541
chr15:44484224|44490999	-3.58033637462623	0.00132407307875738
chr15:51781044|51782828	-2.97300608135232	0.00235278597231907
chr15:51896419|51902036	-2.87497475426878	0.0466099305827556
chr15:51900155|51902036	-2.59937064704343	0.0308691202205556
chr15:55348332|55348725	-2.5429756880455	0.0334057618017092
chr15:58912563|58916999	-1.80421911948698	0.00766553156167207
chr15:59030804|59031702	-1.80723593023597	0.0433719947294556
chr15:62007308|62013992	-1.95360966946706	0.00464847370923674
chr15:63532647|63537156	-2.70662451090848	0.000208143011213579
chr15:64118117|64118854	-2.05369437851973	0.0282095857996893
chr15:64499293|64500166	-1.4681558800043	0.0316627363296174
chr15:68141946|68146700	-2.67004892692444	0.000825614923987315
chr15:68175637|68176654	-2.66866609072381	0.00715330051256525
chr15:76287846|76292700	4.81969508082758	0.0251218954952727
chr15:77365163|77388802	-2.56096994038215	0.0171819853055067
chr15:82382208|82382879	-4.79699120923708	4.24564677512149e-07
chr15:84687625|84691644	-1.64091229997898	0.0432947557672892
chr15:85113873|85117839	-3.18045545075686	0.0207579605508133
chr15:85113873|85121014	-3.104077501113	0.00212974303311225
chr15:89871475|89889140	4.49696290870135	0.0416427469548246
chr15:90439332|90443478	-1.42981961294012	0.046010376429921
chr15:99598430|99633173	-2.96509096780686	0.00448932549865166
chr16:10419581|10473989	-2.75405325304524	0.0030258103262387
chr16:11721577|11736233	4.44529285119106	0.0447274585747156
chr16:1314020|1320517	-2.85295395812764	0.000297343971436906
chr16:14627106|14627336	-1.71215505135147	0.0456610755764518
chr16:17258988|17259498	-2.23909225004775	0.00577221133732986
chr16:22349279|22349849	-1.64004613993748	0.0352448423649527
chr16:27211146|27215008	-2.79835886038132	0.0139305461409321
chr16:27213585|27215008	-2.21186261193502	0.00456088813087424
chr16:30713208|30713711	-2.511414542161	0.0260067786662661
chr16:30728966|30729572	-2.11942586928533	0.00356406084014222
chr16:31090775|31091342	-2.06923831030566	0.00341778533037781
chr16:31361836|31362753	-2.19060125855149	0.0159886988022905
chr16:346148|347106	-2.42944359835851	0.000824674174261651
chr16:4405491|4413404	-2.08914906068653	0.0251216441916776
chr16:47497399|47515601	2.41300771435118	0.0377173100574457
chr16:50786855|50793664	-1.82696247883145	0.0471351292263905
chr16:53439016|53447106	-2.53446009976484	0.00492489889076328
chr16:58559804|58560362	-1.75306209544907	0.0115086789873655
chr16:71738942|71739341	-3.689175373062	0.00287659076332765
chr16:85633914|85634132	-1.51591020091903	0.0305702635621906
chr16:88485939|88489153	-3.5199342114168	0.00105056157250967
chr16:8858350|8859335	4.74458017464824	0.028222967641951
chr16:8920359|8930397	-3.12538852389089	5.0584861713104e-05
chr16:89418284|89431326	-1.89143555352917	0.0469345262859179
chr17:12081356|12095694	-2.77035986593299	0.000477295446728686
chr17:14074323|14077056	-2.76649982443216	0.0224452472337436
chr17:18865469|18865952	-1.67394612517173	0.0453155690119374
chr17:20204333|20205912	-2.21228458918694	0.00190351871338487
chr17:29285710|29287716	-2.69507334315487	0.0258043902722213
chr17:29684563|29703062	-1.62424087823582	0.0287444884931504
chr17:30803901|30804108	-2.36989123583704	0.0101325463681503
chr17:31940286|31973231	4.67483322070867	0.0316395558963462
chr17:32030656|32031458	4.89720163842721	0.0218634062512502
chr17:4066447|4072756	-1.92259061524973	0.0331853224340332
chr17:4242256|4242448	-2.73000828795786	0.0228083256634035
chr17:43378752|43379262	-2.60722092359168	0.0211476458681901
chr17:47326226|47345098	-2.72960131187415	0.0165135045905127
chr17:48396680|48412537	-2.30883906554764	0.0395080258554635
chr17:49311312|49312042	-1.8719184464269	0.00596623271975175
chr17:49719760|49720436	-2.50819611244948	0.01960359714258
chr17:5365122|5368468	-2.04625759325888	0.0414062796395467
chr17:55401469|55403868	-3.08884660445526	0.00156402274123806
chr17:56844019|56848065	-2.19942956155437	0.0237269880669843
chr17:59731421|59738947	-1.64905899134311	0.0213014771491694
chr17:59764971|59773885	-2.16466149088425	0.0109041309617482
chr17:61984171|61985090	-1.73994635690654	0.0240459852057432
chr17:62010550|62063301	-1.97705453397353	0.0333820571720714
chr17:64490824|64492367	-5.16449538689509	3.38205567613613e-06
chr17:65549520|65558736	-2.6398506440385	0.0141357558299111
chr17:67891844|67894165	4.95686395024373	0.0197692159438062
chr17:67945409|67975958	-1.76112744597861	0.0113187614067088
chr17:68209654|68210465	-2.16857594622981	0.0127074597301802
chr17:75042181|75042659	-1.87256434918515	0.0328254325958003
chr17:75242336|75243570	-1.98214411032455	0.00745005488021218
chr17:77402059|77402703	-3.08156663002122	0.000611049289193417
chr17:78004170|78031842	-2.54535861332943	0.00124555841821012
chr17:78079395|78083166	-2.42293091753326	0.0233398278439184
chr17:78400735|78401057	-2.58174104171141	0.00510792630769952
chr17:82905936|82911789	-3.37625828399048	0.000457236492412675
chr17:83048471|83048785	-2.41073373985902	0.0244775379798075
chr17:83084938|83085323	-3.84504459994435	3.04924083482619e-09
chr18:23506970|23509279	-2.564832984578	0.022743407908583
chr18:23507985|23509279	-3.20790763306509	0.00159990414744413
chr18:24143091|24143413	6.57846443508252	0.000544024542380254
chr18:2724899|2752552	-2.12295035902426	0.0443315458479386
chr18:46118181|46128837	-4.05306441553314	0.000558322856423358
chr18:50918110|50932360	4.5151897697096	0.0404211602626289
chr18:54271360|54274090	-1.69934038242365	0.0394850672523118
chr18:54271360|54277853	-2.81379051040047	0.0200605708067671
chr18:58578814|58580548	6.12955674081455	0.00164444957124865
chr18:58659863|58660570	3.07605957612016	0.0201976632424751
chr18:58709378|58735329	4.4102683720482	0.0469435144983012
chr18:79277054|79307234	-2.54870066069679	0.0484988207447471
chr18:79410403|79411501	-2.52586531112629	0.00151537587838196
chr18:79695225|79704917	-3.42151325557653	5.01053259520202e-07
chr18:79695225|79718016	-3.97835127014571	0.000152983449449706
chr18:8076455|8088851	4.63599434621391	0.0336190375154728
chr18:9182382|9195698	-1.93692780490897	0.0245559405781115
chr18:9182382|9211784	-2.2859934301805	0.0305388114251879
chr18:9583117|9595102	-2.13131274069477	0.00434481518483829
chr18:9583117|9595153	-1.80424054616802	0.026931999105719
chr19:11335447|11335783	-2.84784744306832	0.00186800677782984
chr19:1271329|1272051	-2.97146824064984	0.0239410098935985
chr19:1417500|1422396	-2.21867238507516	0.0470318600326664
chr19:17101660|17102557	-1.52644164688467	0.0476154068535899
chr19:18175040|18175697	-3.3230323961236	8.51252004773485e-05
chr19:18342859|18343415	-3.36570475428257	0.00032618883008264
chr19:19296989|19297344	-2.3702141875632	0.0191036635012973
chr19:1969508|1969959	-2.96010634633647	0.0149182287330987
chr19:20645684|20646405	-3.41922123057741	3.63519695950133e-06
chr19:21405129|21405856	-2.3884750024058	0.00104709472825233
chr19:2189732|2194577	-3.55270967529589	0.000243219393361459
chr19:21987216|21988909	-5.32158016734837	8.07526450039066e-08
chr19:22072809|22073564	-2.35788212238957	0.0017715431273142
chr19:29971193|29986417	-1.89985641571342	0.00861224507687712
chr19:29985223|29986417	-1.68775053249104	0.0130592901788445
chr19:34221507|34221738	-2.91898922933793	0.0107063728603207
chr19:3660966|3662001	4.65658119546142	0.032567041429317
chr19:3660966|3667353	-4.18168095037301	0.000132399324903665
chr19:37199400|37207254	4.59687749278304	0.035691692308451
chr19:37425868|37426378	-2.65807882763671	0.0183984956370002
chr19:38343580|38344368	-2.89091868754619	0.0168002894821832
chr19:39453356|39453521	-2.91563324774273	0.00091143182800264
chr19:40034950|40036626	-2.19782353463476	0.0143305058023758
chr19:40583398|40583717	-1.46666445903718	0.0355442708657698
chr19:41268223|41281275	-2.67683789697298	0.0261290909489215
chr19:45264684|45266281	-2.1030742154317	0.0443136753471547
chr19:47362476|47362693	-1.90471427020401	0.0217209769389928
chr19:48149763|48151339	-3.24007615251995	0.00497334490579918
chr19:48633444|48633655	-1.55900073380706	0.0466548852314782
chr19:49599272|49601918	-2.57566470909547	0.0468534634040506
chr19:5039836|5047669	-2.16323393145292	0.0398511749453049
chr19:55098784|55103568	-2.7491838334312	0.000853998865332664
chr19:57455653|57456182	-2.2348215375889	0.0145886569173032
chr19:5941621|5957973	-2.40792795055736	0.0176904055433722
chr19:8548036|8548317	-2.03372695582959	0.0146320030768645
chr2:112299849|112300029	-1.9470732315248	0.00462962065506907
chr2:113939959|113951845	-1.96234768691742	0.0483992710806157
chr2:119926598|119945240	-2.29791545404596	0.00608113013833814
chr2:121757240|121758806	-3.34138480067279	0.00170295970490525
chr2:128164730|128171284	4.59348894813487	0.0360279236846035
chr2:135645379|135652032	-3.01213776694276	0.0347341915634855
chr2:147972739|147975975	-1.94487883142884	0.00552705056297876
chr2:185483034|185502739	-3.56089444152401	0.0021246997856942
chr2:186081330|186099830	-3.68589015558999	0.000982533678252888
chr2:190655977|190673152	3.56255645970002	0.00637412268285107
chr2:190659158|190673152	1.79848127886998	0.0430811757931701
chr2:190900564|190931637	-2.19153923342856	0.0491121743524255
chr2:191062762|191066515	-4.06280310719094	0.000587075191679431
chr2:195680032|195681050	4.9001724774639	0.0218306145073565
chr2:197078703|197090032	-2.17946179233547	0.0197793396150028
chr2:199368605|199433514	5.79256583982537	0.00363373890607282
chr2:201129729|201149835	-2.2838165391597	0.0418969116022944
chr2:201145378|201149835	-1.92754668894577	0.00423987446729268
chr2:202297379|202297906	-1.54202082563758	0.0473034991165235
chr2:202755538|202759353	-2.15623545125284	0.0314464933701246
chr2:207724800|207742342	5.4660098222434	0.00744744879768011
chr2:208285726|208288818	-2.21228272213838	0.0157949767834175
chr2:213310059|213364145	4.50062126700797	0.0413947657969517
chr2:218656150|218656463	-2.88341831212219	0.00407514544862904
chr2:230357805|230361697	2.14637603630847	0.0196103579517978
chr2:230436381|230450255	-5.53793447928257	3.50439554582203e-08
chr2:232787150|232796221	-2.11995915130078	0.00915720654809046
chr2:233388257|233390483	-2.60390811360468	0.000589564444529825
chr2:233449959|233452060	-2.97293453544683	0.0375427015739206
chr2:239352678|239352918	-2.92469831248096	0.0238239016296762
chr2:239990074|240014860	-2.11039452293946	0.0443997770281338
chr2:24135119|24147086	-1.6604172971388	0.027842660449627
chr2:241704653|241712071	-2.94435311925827	0.00478538871846517
chr2:26364302|26373629	-2.72247233563378	0.000511396800167891
chr2:30525587|30533314	-1.6255313858245	0.0487546355918135
chr2:31917926|31943383	4.75907083904168	0.0277184505438462
chr2:32377588|32395593	4.41304469863154	0.0468697490709499
chr2:37316237|37317179	-3.76394455873726	2.57784855266406e-07
chr2:38585644|38591648	4.58531059171503	0.0365093613422536
chr2:44201186|44209327	-2.672659845047	0.0098183259840222
chr2:44209210|44218537	-1.92926463749508	0.0152065938581181
chr2:53887259|53893799	-2.49693036004163	0.0369759092125588
chr2:55640627|55643425	-3.34882680643546	0.0163367127566095
chr2:58198594|58232112	-2.44561205242275	0.00667351377927926
chr2:63433745|63439871	-2.80088578544846	0.00687426802966962
chr2:68490190|68513680	-2.4462933670156	0.00541825504201695
chr2:71396141|71418639	-1.62637272511416	0.0205408425915055
chr2:72718103|72733118	-2.23185021771114	0.00124675999892811
chr2:72731007|72733118	-2.2636081406949	0.00198384761182306
chr2:74046278|74048411	-2.57636684455429	0.0482786734965897
chr2:8243565|8287558	-2.56647140909326	0.0171392517948641
chr2:84870225|84870785	-3.53860648447961	1.21265513361249e-05
chr2:85861181|85863485	-2.52583455363414	0.00244026137865466
chr2:86765027|86766024	-2.56885239769088	0.0323473347892768
chr2:99186177|99195756	5.20652340163106	0.0124182271143334
chr20:17955365|17957037	4.90820032042588	0.0214351080098627
chr20:21339044|21344208	-1.79218492080887	0.0363696349734672
chr20:21590945|21591247	4.66084988632188	0.0323523781164161
chr20:33619517|33623296	-1.7475133574174	0.015811014758538
chr20:34031522|34033318	-2.2567262977542	0.0079030727378086
chr20:35858302|35871829	-2.84085639892376	0.00151027271022701
chr20:41512846|41533570	-2.36455358217369	0.0470198076873099
chr20:45853923|45855292	-3.98205318092669	0.00189606492761095
chr20:50902017|50904001	-4.49236285254699	4.51579542868594e-05
chr20:51516784|51523596	-2.36730236643703	0.0126348797114529
chr20:53953432|54028972	5.38550716403974	0.00870230940136806
chr20:53985287|53996050	4.64186807011024	0.0332873126942546
chr20:53985287|54028972	4.63682554909893	0.033631293393754
chr20:54028392|54028972	4.98226683172358	0.0188918352438372
chr20:54157169|54171670	5.72145909006029	0.00421583997485101
chr20:5565017|5570239	-3.01871376777566	0.0213590788043381
chr20:63928335|63931022	-2.851518928294	0.000406122721680259
chr21:15762891|15766141	-1.83688641520848	0.0063909742547892
chr21:24485623|24488309	-3.69782597537049	0.0054069004657861
chr21:29326059|29329693	-3.17226692016306	0.00164411735178132
chr21:29329487|29329693	-3.024986372694	0.0220498536327096
chr21:34102835|34125480	-2.63068342540993	0.00776043557017091
chr21:37420299|37421866	-1.86664753698248	0.00782786523402056
chr21:42994848|42995343	-2.91639176980314	0.00743323688480829
chr21:44855210|44861271	-2.26961039269926	0.00191479822147073
chr21:46643535|46644488	-2.204773282415	0.0191447365900065
chr22:32478981|32479275	-2.13844303276755	0.00206553852330371
chr22:41338313|41339191	-2.33839264811378	0.0175665323321232
chr22:42411407|42411736	-3.0592943239007	0.0120309241511498
chr22:43039780|43046573	-1.71315691517052	0.0497877635775197
chr22:45330603|45332710	-2.91217531223397	0.00756913135756226
chr22:45689712|45718493	4.69081180103996	0.0308544064960163
chr22:46343262|46346544	-2.22444522968835	0.045104510621374
chr22:46707843|46721015	-3.5922885753224	9.35326809520675e-05
chr22:46974290|46997709	-2.09763241983359	0.0357782349880832
chr22:49775591|49777813	-3.85771190918679	0.000600299005044577
chr22:49775591|49799119	-3.14958979845805	0.0301221915536092
chr22:49787390|49804360	-2.84840598447098	0.028149091285205
chr22:49794034|49799119	-5.75434374922594	5.2911809793227e-09
chr22:49794034|49804360	-3.34146893663788	0.00254888582329771
chr22:49797805|49799119	-4.23935262614866	4.99959789174412e-08
chr22:49797805|49804360	-3.35346252668224	0.000113743932993625
chr22:49804204|49824331	-2.87175500632484	0.0117516717738385
chr3:119503532|119517315	-2.1827995318942	0.00788497608539608
chr3:123931102|123949132	4.59852794776634	0.0357093523136691
chr3:125313308|125331233	-3.0113624306948	0.0222785679861788
chr3:138570318|138571356	8.37165620657772	2.80056442996537e-06
chr3:138570318|138572932	2.94731350314683	0.00489429701215476
chr3:138570318|138572984	6.06946680125814	0.00184956396327053
chr3:141260123|141287453	-3.30794221739087	0.0117205439258977
chr3:141553857|141559995	-1.47824564746629	0.049506459528305
chr3:142093061|142101841	-2.12846601216549	0.023206376917783
chr3:143795001|143832221	4.77575054210342	0.026965363962743
chr3:149846011|149872154	-1.92178997320607	0.0116902731065021
chr3:149846011|149921227	-1.37727993577512	0.049021245980011
chr3:149895473|149921227	-2.22495553764176	0.00672825627651475
chr3:150562542|150568292	-3.57894791285798	0.00385682789793487
chr3:151116338|151127984	4.67840268148438	0.0316873938018411
chr3:152414941|152432920	-2.16777439669701	0.00359051400509143
chr3:152445282|152447773	-2.34918100176434	0.027921197882789
chr3:15411245|15415942	-2.2133911445225	0.0131524478735886
chr3:155829688|155834041	-1.91713878444832	0.0209940594690487
chr3:16301626|16302748	-1.95711145851026	0.0261843150043355
chr3:16301626|16303592	-3.36691978259655	0.000161692390739965
chr3:170122591|170122744	-3.20681637327028	0.00888958718447719
chr3:172247533|172251541	-2.28654209351525	0.00207281338540085
chr3:17622648|17625224	-2.34884876477087	0.0493920972309491
chr3:179203544|179204588	-2.12384681350863	0.00764674225836591
chr3:179592644|179598771	-2.44578341114337	0.040489746874604
chr3:179764002|179765848	4.87440940473688	0.0227765033587909
chr3:183205876|183207823	5.84232749322936	0.00319111433818789
chr3:18378170|18420991	-3.54806944326628	5.85648265075597e-06
chr3:183833492|183833825	-2.33813324067606	0.0496321078299402
chr3:18415111|18420991	-2.96881231428451	0.00220646239472047
chr3:18463480|18527326	-4.60760725732011	2.94585860374746e-06
chr3:195381009|195392147	-1.61189493385835	0.0242735168201808
chr3:195878253|195888606	-2.31423605358357	0.0135652505553008
chr3:197051577|197069260	-2.42053716746562	0.0427519210222588
chr3:197081051|197085756	-3.24956998617627	0.00789464819481897
chr3:20071584|20072459	-3.88858413827059	0.000911112725421697
chr3:32544876|32545965	-2.45585997699654	0.0401373779740196
chr3:33812072|33822082	-2.21320870628112	0.0181059415468752
chr3:37249698|37273601	4.40558594811431	0.0476077750757992
chr3:38062169|38062801	-3.56609935686816	0.00398429516741204
chr3:43299754|43303792	-2.71046739208296	0.000108233162365933
chr3:47675475|47678311	4.40512987922432	0.0477287286693414
chr3:51541498|51552063	-2.56478964573028	0.000148467641176112
chr3:52412811|52414587	-2.1672219884894	0.00402760002986444
chr3:52737586|52741499	-1.84545312470218	0.0219462626011111
chr3:53290791|53292827	-2.29340897615679	0.040414292674984
chr3:56592970|56594028	-1.43521955524142	0.0381891605147017
chr3:60011371|60014264	-4.2308455265167	6.47074807251291e-05
chr3:66405198|66462509	-3.86944980894516	4.16467280821112e-05
chr3:67495798|67508903	6.79941983675812	0.000280715816497656
chr3:71015549|71053773	-3.49333042767474	0.000297872417233954
chr3:71041328|71053773	-2.8710807239996	4.79821048755311e-05
chr3:71690010|71701096	-3.41958329937024	0.00135282368962127
chr4:102580535|102582957	-1.83553200520345	0.0166240852574037
chr4:102689574|102730736	-3.024986372694	0.0220498536327096
chr4:102714438|102726683	-1.54172294106628	0.0402561832043587
chr4:102722871|102726683	-2.06562810348715	0.0152019718347845
chr4:104518577|104519454	3.15339058392805	0.00867090155913828
chr4:105424196|105456745	-2.18935711055262	0.0160367392873263
chr4:107682015|107701285	-2.38151854841272	0.0339689491385143
chr4:109462901|109473186	-3.03226238485386	0.0126096533639518
chr4:122170615|122175914	-2.3768790100603	0.0465112179036287
chr4:122927634|122938249	-3.49659835091539	0.0130240663077711
chr4:1311979|1327703	-3.09590201465798	0.0209176013304472
chr4:139116649|139139497	-2.75391716661683	0.00621505088419911
chr4:139125164|139139497	-2.09627023330918	0.00944957821418549
chr4:139137630|139139497	-2.20315416774859	0.0291998870029387
chr4:142402938|142462726	4.78549419094364	0.0264733269469796
chr4:143543509|143543972	-1.69935377282404	0.0120190517468343
chr4:152411303|152469988	-1.83622012713978	0.0273150324413308
chr4:166039339|166078030	5.26380466782706	0.0110588488406319
chr4:166055076|166078030	4.5067752581368	0.0407227087723022
chr4:185418441|185418770	-3.43501271409539	0.00305264624434741
chr4:22401431|22402799	7.46926144594666	4.08513120304012e-05
chr4:2949934|2951245	-2.08902803354063	0.0477763775826502
chr4:2956670|2957740	-2.95657356191405	0.0391974984695179
chr4:36107565|36121326	-2.50063381303286	0.0267651181952772
chr4:39837856|39842056	-2.64612452743965	0.0101193945453849
chr4:42551198|42556040	4.62249940688052	0.0343609327106901
chr4:42616033|42627109	5.25433938963534	0.0113002263563016
chr4:48369849|48394653	-1.89727665688064	0.0470966780854971
chr4:51863437|51877854	-2.46273969007513	0.00107065093003771
chr4:51863437|51891851	-1.87873548422872	0.0121770267434887
chr4:5663107|5665649	5.41641699994316	0.0081838140628877
chr4:6923373|6924111	-1.78048803473476	0.0180555987555466
chr4:6994184|7001251	-2.35193135891849	0.00605691639789945
chr4:73085249|73092300	-2.05067620279002	0.0079708747500343
chr4:77742141|77776392	-2.85423364332334	0.018446566862865
chr4:77756862|77776392	-2.03950148168434	0.029656549877185
chr4:78826037|78851056	-2.38461551745684	0.0146215234713537
chr4:81456651|81459514	-3.08746433607981	0.0320180757257409
chr4:82856952|82857764	-2.80734998588914	0.019923212258708
chr4:87046166|87047594	-1.66909367626984	0.0248815383582016
chr5:103096541|103097781	-1.61865537842987	0.0262422675064947
chr5:10415488|10417404	-1.70684262171083	0.0310040626873912
chr5:1057471|1065478	-3.12749591197725	0.00297588483077026
chr5:1060344|1065478	-3.66707238165649	0.000399802795878601
chr5:108798124|108798389	-3.08450581713529	0.011648014941382
chr5:109713520|109729513	-2.04515438296107	0.00516625675198465
chr5:131677703|131709272	-2.16086405795884	0.0034389525738154
chr5:134158455|134174022	-3.04069208769072	0.00567807657426509
chr5:137985257|137988315	-1.45435210794014	0.033125748328465
chr5:137985257|138021197	-4.38204515304985	0.000355911241289474
chr5:142885298|142932125	-3.37849225569664	0.000647600625383939
chr5:143037196|143057747	-2.46995528835688	0.0153779845420493
chr5:143054439|143057747	-2.19001321423906	0.00437963264525754
chr5:143399656|143400852	-1.75867262654107	0.0193230843558444
chr5:1488391|1501603	-3.92737252580985	0.00154085533796811
chr5:157294783|157296774	-2.50290135727833	0.0363963434861462
chr5:171391305|171392978	2.66171495766497	0.0482582031896681
chr5:173108624|173112379	-2.3563814937757	0.00842818654499035
chr5:179560025|179577136	-3.33765369010868	0.0017378013129359
chr5:34179013|34182867	-2.53047214617181	0.00256354529753443
chr5:38990949|39003622	-3.05119665486016	0.000112163957918879
chr5:39002535|39021136	-1.78860145948467	0.0460666929169927
chr5:50274988|50411383	-2.25184101384061	0.00702416271781826
chr5:50399107|50411312	-2.42487315751231	0.0428622767623116
chr5:50750151|50763242	-2.46916114792722	0.00293117129943187
chr5:50778069|50797233	-2.25434258846563	0.00450391510538234
chr5:55697846|55704434	-3.69667072403614	0.00285430967844756
chr5:58988493|58993465	-2.1195199875072	0.0206430035798634
chr5:65567513|65572286	-1.4680174640784	0.0420271242597734
chr5:65680494|65685472	-2.40695416109892	0.0144458805263194
chr5:65988635|65994864	-1.46489029383223	0.0378745605009811
chr5:66012049|66014725	-1.99284759252801	0.0102613583330989
chr5:69355649|69355953	-2.49467278937874	0.0373305092206749
chr5:73058433|73077493	-3.4204671831867	0.015290036131824
chr5:73074742|73077493	-2.64519376483514	0.000577269000696539
chr5:77046347|77048987	-1.9937952567929	0.0187545916075727
chr5:79618647|79620083	-2.62656135404972	0.00367385045249515
chr5:79656958|79669028	-3.82652152250958	0.00013648996352637
chr5:80146090|80147284	-3.51709089647616	1.49192767495207e-05
chr5:83537007|83542268	-1.79238795318808	0.0320012610763309
chr5:93958777|93964523	-2.83771894181569	0.0296369431282587
chr5:94628811|94630743	4.59764018408832	0.0357816912654095
chr5:94643273|94654752	-1.53859161793404	0.04559774446092
chr6:100766565|100767345	-2.98358263649043	0.00639635162349301
chr6:104744160|104750472	-2.12239018511086	0.023930745494605
chr6:107744949|107772386	-2.49751176530672	0.0199728952837377
chr6:111262257|111263946	-1.63479924856363	0.0413416444106485
chr6:116689320|116692392	-1.58317762718236	0.0201368004350163
chr6:116698704|116705160	-1.7324622203944	0.0144632997389403
chr6:118448404|118449870	-2.09699031477296	0.00885939279757181
chr6:118523802|118566316	-3.12044620807074	0.0306593578667986
chr6:127812883|127813931	-3.68490543430926	0.000600995952825413
chr6:127855030|127901081	-3.70018813324299	0.000931547791741203
chr6:130154825|130184623	-1.92827968321641	0.0451198963327379
chr6:130184103|130184623	-2.28711246280701	0.00121424631554102
chr6:13639563|13644729	-1.57219700681289	0.0428576273257256
chr6:137871213|137871522	-3.49864371004543	0.000637184131220473
chr6:145888020|145894977	-1.63340206647619	0.0470718852565414
chr6:149369909|149379518	-2.43188213175054	0.00309198720393398
chr6:158707230|158725637	-2.46143140672403	0.0287857663373987
chr6:170317370|170323259	-3.09308365840189	0.011341152907248
chr6:170546103|170549113	-2.85298617560677	0.028312752111123
chr6:17674905|17675770	-2.89444972928872	0.00812706453405545
chr6:20546346|20548705	-2.20755898541625	0.0187287658354109
chr6:24865301|24869147	-2.66739827902238	0.0395907929290237
chr6:3085259|3104315	-3.81345090996543	0.00118926016698548
chr6:34606555|34606904	-1.90946048355394	0.0342443479098596
chr6:53071057|53076543	-1.8968929850786	0.0241116430564329
chr6:57050774|57055797	-2.45479173261228	0.0052063443955617
chr6:63646527|63646795	-2.27189594806511	0.0326173521496212
chr6:7303550|7310029	-2.82879472000938	0.000393422479967127
chr6:75647731|75659407	-2.10045888013302	0.0149389469295879
chr6:75659262|75678927	4.58530878018493	0.0364646361459471
chr6:75702645|75703072	-1.52558006735694	0.0375583076622814
chr6:79060478|79060818	-1.97849031511122	0.0157261024831309
chr6:83398367|83407901	-3.10753767567887	0.0105696193009241
chr6:85530192|85533800	-3.42436948267371	0.0143532384816239
chr6:90249689|90271941	-2.80187080654652	0.000470272965282674
chr7:102227367|102227669	-2.8372619970719	0.000554106875129688
chr7:103025063|103029418	-2.75262708158525	0.00760246725214174
chr7:116110708|116112038	6.76277401790495	0.000411951961535586
chr7:12224226|12229819	-1.93951798932504	0.0244357514971826
chr7:131052425|131076587	-3.34405317877794	0.0164024424199637
chr7:135577796|135593192	4.55889233620982	0.0378681952122336
chr7:139053451|139054095	-2.33630774165952	0.0496489706704707
chr7:139053451|139055295	4.59799084324964	0.035686416463186
chr7:140776912|140808995	-1.98475735371592	0.0276244922833618
chr7:141636960|141649333	5.45650389131726	0.0075205625508201
chr7:152309966|152358675	-2.46440250694722	0.0397329965946725
chr7:158759486|158773396	-2.67410354976788	0.00939855331971539
chr7:17890363|17897446	-2.0349498002051	0.0356745483561735
chr7:1898200|1936897	-3.92453260998553	0.000106875779628435
chr7:2229984|2230727	4.50910557657417	0.0408546461563399
chr7:23611171|23611553	-1.40191205686261	0.045335236340096
chr7:24623666|24650712	-1.76271772380402	0.0438619713175784
chr7:24623666|24668660	-2.31527820051252	0.00589785502148774
chr7:24623666|24680520	-2.95403543343858	0.0146411938742966
chr7:2524695|2526921	-3.16723547236514	0.000472044590531926
chr7:26206368|26208555	-3.35785623391956	0.0165694737211644
chr7:27629371|27649633	-2.45041013631586	0.00131997130021383
chr7:27785163|27785489	-1.52100276212017	0.0416867161250799
chr7:39987599|39988258	4.97848011284906	0.0190344974091811
chr7:43986192|43986677	-2.85110122822009	0.0060453310627246
chr7:44013593|44016523	-3.024986372694	0.0220498536327096
chr7:44645327|44647759	5.244965408688	0.0115555734677836
chr7:50319048|50327757	-2.14172256681572	0.00123905534843657
chr7:56083278|56083715	-3.06557233202614	0.00775654192032031
chr7:64336259|64336982	-1.79813163770581	0.0447617771513512
chr7:65979399|65980409	-3.79918720035972	0.000452602707807692
chr7:6814764|6822364	-2.05913501735934	0.0173827387122846
chr7:6814764|6823360	6.33126689538402	0.000980444254960801
chr7:72830692|72831798	-2.65177612541263	0.00183348844768783
chr7:72830751|72831798	-3.28873392865445	0.00440353428934219
chr7:73686636|73687095	-1.73982329395529	0.0325611150532819
chr7:77387360|77406105	-4.06712039761215	0.00108681327085577
chr7:92294889|92307656	-1.63769903838973	0.0351221999743405
chr7:99388039|99390012	4.60427209827613	0.0354149488827607
chr7:99908582|99909660	-2.99657658258494	0.00905272593999582
chr8:103430612|103435790	-2.33512637985038	0.0376296921870688
chr8:104068512|104148848	5.70822001085555	0.00454273057031511
chr8:106679210|106684359	-4.18997092842588	0.000392837426593054
chr8:131940499|131946633	-2.87060850919398	0.000345668324163914
chr8:132722040|132757294	-1.79281326225273	0.0302262059900145
chr8:134812610|134813169	-1.88768970923908	0.0316936737358155
chr8:140864312|140890769	-4.07403998083004	0.000178257908370519
chr8:140879471|140890769	-3.37663853375003	0.0155311848760956
chr8:17963101|17967170	-2.43721758366895	0.0412877886708869
chr8:2492872|2494091	4.84434305669299	0.0239933941985014
chr8:2595565|2596704	6.77073275259543	0.000300760550117216
chr8:27294080|27294310	-1.69105152858538	0.0285215583228479
chr8:30101898|30104486	-1.51102336123891	0.0293068865914631
chr8:38788704|38820635	-2.71482299551908	0.0120862290876695
chr8:38943789|38946221	-2.19960146594834	0.016066934392611
chr8:42048378|42049707	-2.06334893676648	0.00419590062917099
chr8:42906173|42930172	-2.26675204281145	0.0424718228919283
chr8:43059092|43064215	-1.71878245402757	0.0229750226747169
chr8:47394978|47407961	-2.79292617098015	0.00496259149534751
chr8:47396376|47407961	-1.65207725253768	0.0273913903608835
chr8:51860845|51861246	-2.20918368961302	0.000810442951940074
chr8:51860861|51861246	-2.69071532528066	0.003784990219947
chr8:60794986|60801593	-2.72730445897769	0.00264864992921544
chr8:66572482|66573506	-4.54200641486549	5.53328059066806e-07
chr8:66572482|66593194	-3.0962005452088	0.00317136392219847
chr8:66572482|66602523	-3.4353180984608	0.00522299047297185
chr8:66592440|66602523	-3.57041331416245	0.000351803897435924
chr8:66601698|66602523	-2.78317457488223	0.00166585132969226
chr8:668598|674047	-3.3688247035913	4.78183943208024e-05
chr8:67103037|67132080	-3.04586378089549	0.0336506354366382
chr8:67103037|67154136	-3.23360466408572	0.0191844802902279
chr8:67118248|67137603	-2.33452348730737	0.00407212434105688
chr8:70594506|70598255	-2.27955121414756	0.0323445198081393
chr8:72052539|72076627	4.79768740234915	0.026010305943998
chr8:80499494|80500382	-5.40553400858356	1.81010418601605e-07
chr8:81029996|81048864	-2.77398460991811	0.00742477454692591
chr8:8933853|8935790	-2.92842467920282	0.00367888597780835
chr8:8991548|8994254	-5.16249750109426	3.33655426338779e-06
chr8:96680443|96682076	-2.81905106907225	0.00941543338699512
chr8:98706467|98707311	-2.87658601642409	0.000418471606454381
chr9:100052417|100060172	-2.09348828701447	0.0467606186120725
chr9:100498765|100516771	4.56194217554758	0.0377432530518969
chr9:106972005|106984409	4.43766170744936	0.0452793432943909
chr9:109106508|109108570	-2.87465352658833	6.97018276647368e-05
chr9:110136127|110138539	4.65035138627783	0.0327889753434092
chr9:110972073|110973558	-2.84623723899017	0.0014545828231471
chr9:121161856|121166180	-2.11122235033344	0.00208133546943949
chr9:121171159|121171548	-3.49432506279138	9.77099268465137e-05
chr9:123757703|123769563	-2.02270810431879	0.0257240521103631
chr9:125326416|125330218	-2.83694290058587	0.0294873228733389
chr9:131506114|131506453	-2.15264845271841	0.00185276248492036
chr9:133412299|133412921	-2.401695202833	0.00605483496199652
chr9:134482224|134482884	-4.93910481426868	1.61163669432675e-05
chr9:19288596|19300331	-2.63861114221284	0.0281780283415646
chr9:26861066|26884885	-2.52274393046479	0.0106318362440673
chr9:33953285|33956146	4.82761956355169	0.0247313964754254
chr9:33960826|33996333	-2.65177364188361	0.0272610443790799
chr9:36352742|36353331	-2.41547642449668	0.0169955979081558
chr9:3647338|3651867	3.19411818699331	0.0155673878102345
chr9:37126312|37126942	-1.43750221352313	0.0415559991996963
chr9:37126312|37147445	-1.95241194966656	0.00664696713124627
chr9:4286038|4286523	4.60036455145444	0.0354827013176283
chr9:4823548|4833228	-1.78926442329461	0.040915532402835
chr9:4860125|4860901	4.65447650930497	0.0327430041487183
chr9:5968019|5988545	-1.73325734589058	0.0305472704504604
chr9:71740063|71740232	-2.13601379076771	0.0121607174696369
chr9:74816669|74816964	4.83855043068661	0.0245093099226096
chr9:74816669|74821837	5.29890779174339	0.0104315987299351
chr9:77214329|77227485	4.77705720398217	0.0268391627652611
chr9:77794463|77797648	-2.43173638139518	0.00256535023294792
chr9:83661777|83669327	-2.46575552144277	0.0040112444449972
chr9:83682951|83686155	-1.66420085178506	0.0211395437764907
chr9:83768818|83788678	-2.23383050397599	0.0344914164320756
chr9:85677436|85712566	-1.89591028360022	0.0277032595697904
chr9:85692689|85712566	-1.85358244576104	0.0183864404908184
chr9:93471141|93476338	-1.52529296779645	0.0308694955303661
chr9:94967758|95005616	-3.08736167041745	0.0322213621245149
chr9:96458379|96458541	-2.29886945940856	0.00335946115411441
chr9:96458379|96471094	-1.91797500827327	0.0465037871642558
chr9:97994631|97998678	5.2080158763464	0.0123572747874
chr9:98018289|98026451	4.56297529759419	0.0376774902641493
chrX:101041317|101042312	-3.07785602450012	5.71265085944507e-05
chrX:118542725|118546116	-1.65581776862799	0.0309008108835581
chrX:1285778|1290509	-2.63496400899592	0.00157425666721622
chrX:132281095|132283032	5.80457665448218	0.00347523674682179
chrX:14843660|14859334	-2.75236859476193	0.0224170382650425
chrX:148651999|148662768	5.40078844524941	0.00846083999016549
chrX:148661908|148662768	2.13598928780697	0.0262608717903718
chrX:150736595|150737448	-1.92288828706476	0.0378754244443512
chrX:1593444|1595532	-2.99471731368435	3.09307430314123e-05
chrX:2719661|2726373	4.49566470229674	0.0418133624614386
chrX:3817545|3818500	-3.50774447725782	0.00254942099131488
chrX:44524002|44527365	5.27071144522297	0.0109541799370302
chrX:51327721|51357027	-1.69541162990644	0.0167484459394858
chrX:53403566|53403893	-2.12698913819463	0.00714038074976367
chrX:54636235|54636427	-1.78818892424908	0.0453328138521083
chrX:63665886|63706449	-3.09590201465798	0.0209176013304472
chrX:68046994|68053810	-3.024986372694	0.0220498536327096
chrX:78014662|78020398	-1.77281832575729	0.0299043637600892
chrX:80791854|80793772	-2.64840026674247	0.00129115733618424
chrX:85303406|85308216	6.11991679748706	0.00165228146573948
chrY:12912963|12914649	-2.28579281355657	0.0303122134378186
chrY:2953909|2961646	-1.44585816514766	0.0460918537789765
chrY:3079284|3102194	-3.56589244119074	6.11597102634761e-05
chr1:100439932|100468094.1	-2.86551628491717	0.0186230193440341
chr1:103565435|103575540.1	-2.69833731634574	0.00359792334399211
chr1:108148279|108161293.1	-2.7109033785774	0.00151494544244936
chr1:108752257|108760085.1	-2.36054013409468	0.0353569178029485
chr1:110891392|110892533.1	-2.27882558899681	0.00222752421806803
chr1:113829592|113834439.1	-1.74672484769354	0.0148053088045202
chr1:113848540|113855049.1	-1.72991637942424	0.0245853896237568
chr1:117402186|117405645.1	-1.55707914957831	0.0267833871102929
chr1:150230571|150231926.1	-1.95207515642323	0.0304848501253903
chr1:151024611|151027327.1	-2.38722806883883	0.0256032569851265
chr1:151166934|151167414.1	-1.93219895868719	0.00587309592845031
chr1:151172268|151173615	-2.20766361457272	0.047623096503353
chr1:153667555|153668557	-2.61840874201463	0.043337050816486
chr1:154234591|154235291.1	-2.3906311782649	0.0114720755965907
chr1:155349327|155349596	-3.09123593769539	0.0326188600741556
chr1:155521100|155521618.1	-1.56263020980963	0.0478983319072438
chr1:155675010|155680456.1	-2.38902509871168	0.0246521990857194
chr1:155853276|155853806.1	-1.58507600122022	0.0213730045518485
chr1:160323431|160332557.1	5.13756845974845	0.0141774642075203
chr1:1669664|1734835	-3.04162553756515	0.0007954885087418
chr1:171568247|171575128.1	-1.91933236175468	0.0173980892793958
chr1:174272414|174394145.1	5.28030078221092	0.010720076173821
chr1:175986943|175989479.1	-1.97793332784712	0.0466663280303282
chr1:179342114|179343635.1	-2.4212963631557	0.0424507966473936
chr1:179347600|179350431.1	-2.49545298475958	0.0203156358793682
chr1:193135391|193138173	-2.8617242641301	0.048410127273866
chr1:194159280|194167715	-2.74743094331882	0.00549356424210556
chr1:197583152|197611976.1	-2.23997292151045	0.0454983956820036
chr1:197642711|197658369.1	-3.08134329736223	0.000151990418726195
chr1:197652235|197715074	-3.35973510319749	0.0163726144764615
chr1:203770828|203772147.1	4.38051116112465	0.0490281327848583
chr1:205616478|205623891.1	-1.41461826438567	0.0420476255490498
chr1:205618957|205623891.1	-3.35873057852264	0.0162926772894289
chr1:20770930|20773610.1	-1.64906809340031	0.0189802062856507
chr1:20969474|20981227.1	-2.16570293505638	0.025811521738269
chr1:211778918|211793190.1	-1.64370289184022	0.0401942111971585
chr1:213117317|213129889.1	-2.00227917535831	0.0457508782547415
chr1:21721036|21721764.1	-1.87860062794586	0.0486647361567749
chr1:22078429|22086866.1	-1.96961380071466	0.0293478327291008
chr1:22078429|22091501.1	-2.05680801978383	0.0319496879996172
chr1:223954477|223962273.1	-3.03006044035157	0.00581783521896543
chr1:2302978|2304585.1	-4.18159823012028	4.29719578864785e-10
chr1:23030469|23050520.1	-1.77643163275928	0.0136414836688089
chr1:231795242|231818517.1	-1.57274930343729	0.0392661574252119
chr1:233090061|233095863.1	-1.92107494048019	0.0278310862625055
chr1:233198939|233218184.1	-2.93103750427528	0.0106150419187842
chr1:233217899|233227371.1	-1.69244203309805	0.0346586867846895
chr1:235773842|235787373	-2.6951650824573	0.0373296827746811
chr1:235780865|235782087.1	-2.44575805009518	0.0126242418235648
chr1:243695591|243843282.1	-1.94134163903522	0.0368623564597834
chr1:245002121|245017326.1	-2.86895765610718	0.0118534045551046
chr1:245002121|245059458	-2.86273747967883	0.0177518585928304
chr1:24514314|24514567.1	-1.88539232953347	0.00485982526652944
chr1:25242374|25243633.1	-3.16174472842399	0.000602586485674916
chr1:26453609|26463433	-2.20944515107171	0.0370634656522977
chr1:26942660|26943065.1	-1.66587321226455	0.0243622613999575
chr1:33294937|33295305.1	-1.60410764232978	0.0369379170474669
chr1:35358925|35361789.1	-1.4657458166806	0.0374017466952839
chr1:39853970|39857417.1	-2.06148687982931	0.0228764426051686
chr1:40189055|40202614.1	4.97229201482913	0.0193181321507374
chr1:41070595|41075451.1	-1.58002795550126	0.0242788659144765
chr1:42265115|42323827.1	-3.38913653675666	0.00596077510673169
chr1:42278348|42311110.1	-3.65943680485278	0.00587382070225039
chr1:44319628|44339322.1	-2.98801779367902	0.0374625510185654
chr1:44411981|44412722.1	4.50364125452718	0.0413415979809387
chr1:51402435|51408332.1	2.18832438370911	0.0425254075833638
chr1:52477708|52481923.1	-1.94220768976759	0.0276128394558617
chr1:58506060|58534331.1	-1.77313956094714	0.0422036117984151
chr1:805799|810170.1	-1.79775831850619	0.00753641405216308
chr1:88740988|88741288.1	-2.89520393177538	0.00780214403192041
chr1:91861471|91864279.1	-2.66396647787883	0.00963185974954103
chr1:95143891|95151419	4.91195150360587	0.0214574956389617
chr1:97515726|97549744.1	-3.66156216880881	3.23514280858162e-05
chr10:100260218|100262063.1	-1.78275209715169	0.0372747078910547
chr10:101939863|101957732.1	-2.06951404513955	0.0129831363022291
chr10:102654653|102656385.1	-3.27793005475834	0.00299334155974914
chr10:104008177|104018908.1	-2.01346913858571	0.0126204203029638
chr10:1080011|1080476.1	-2.16236160067332	0.0399944748443698
chr10:114970368|114974385.1	-2.54200238462491	0.00169948001999995
chr10:11997672|12014184.1	-1.71040900776867	0.0204979779638328
chr10:12235048|12238485.1	-2.50531503705643	0.026672186275011
chr10:124681607|124696212.1	4.43512242387031	0.0457959281406117
chr10:130166507|130171636.1	-2.31025551167507	0.021750495375593
chr10:131308211|131309299.1	4.72213556583867	0.0292652973295711
chr10:15816835|15847943.1	-1.48345677596795	0.0412579790579755
chr10:15833630|15847943.1	-1.52843421903873	0.0354689788973497
chr10:21882282|21920963.1	4.41579066511649	0.046960298382593
chr10:26500819|26503274.1	-1.91704552655556	0.0374139367024284
chr10:27142387|27145590.1	-1.97516406030404	0.00676978623707344
chr10:28147483|28150059.1	-3.91721881732572	0.00151937325687285
chr10:4830675|4909606.1	-2.88400392823606	0.00823749514979665
chr10:48401612|48410168.1	-2.02567985727289	0.00767499930950504
chr10:60084602|60085253.1	-2.71486114155811	0.00492614693547297
chr10:6213623|6226365	-3.76748300728666	0.000781608308853635
chr10:62198283|62239765.1	4.96798701554269	0.0193366866602706
chr10:72708283|72715902.1	-1.67300558023237	0.0373620196753984
chr10:7276892|7285954.1	-2.42406852592161	0.000384245992871021
chr10:84417771|84425893.1	-1.52880939292081	0.02583388419549
chr10:84438512|84477664.1	-1.98584943155183	0.00676912837549214
chr10:863743|885760.1	-2.86237362305069	0.0123976040203001
chr10:88893871|88905660.1	-3.63633532087501	0.000287349780306678
chr10:88901656|88922436	-2.5291637210736	0.0349190391286655
chr10:93381219|93389154.1	5.42906528815235	0.00799595224478813
chr10:97436417|97437750.1	-1.43125226439103	0.0413827331770482
chr11:108046270|108054955.1	4.47529146613019	0.0429630606692617
chr11:108176246|108177090.1	-2.09677228871262	0.00211483018635827
chr11:108227595|108229323.1	-2.27189124607464	0.000838857154114578
chr11:108227595|108247127.1	-2.3717747253789	0.0472073455207552
chr11:108235670|108245026.1	-2.320404583807	0.00667763722920624
chr11:108258986|108267342.1	-2.02883062202001	0.0249833724169234
chr11:108267171|108267342.1	-2.7812565798679	2.8348526042949e-05
chr11:108327645|108332037.1	-2.53125866473444	0.0064728259031754
chr11:108329021|108332037.1	-1.82203926847788	0.0364415753184092
chr11:116863668|116873636.1	-2.56291905244264	0.0482800851200212
chr11:120406118|120409450.1	-2.77679862721322	0.0212335836141207
chr11:128768118|128772985.1	-2.69846161754426	0.00179686601510998
chr11:17878208|18010139.1	-2.20411606389892	0.0297835687137088
chr11:17959470|18008076.1	-2.59112106750842	0.0450573041968048
chr11:2768844|2778037.1	-4.06297928823222	0.000189277747844066
chr11:34089395|34092056.1	-2.19982625655501	0.029279822836044
chr11:34957384|34978182.1	-2.36170733825368	0.00483074643607475
chr11:3768581|3768744.1	-2.5238034533608	0.0135741198872542
chr11:47358844|47375729.1	-2.19882885638336	0.0368996210321642
chr11:47358844|47375732.1	-2.5753194203495	0.0483832452749585
chr11:57491224|57491862.1	-1.70482662130498	0.0499491875419925
chr11:581492|582081.1	-4.6413510207938	4.62480460911098e-05
chr11:66238804|66239277.1	-2.56202414924534	0.00959622240660899
chr11:66639700|66640123.1	-2.25734979260941	0.00101975172505553
chr11:68551121|68564432.1	-1.83857109398243	0.0356614850530329
chr11:68567014|68576043.1	-1.62302110289973	0.0407512408605314
chr11:73707420|73718718.1	-1.58554872388154	0.0258270336534705
chr11:73707420|73718890.1	-1.78371923431866	0.0335519047513835
chr11:74859158|74863021.1	-2.48565176171745	0.0383315525856942
chr11:77619606|77625818.1	-1.59861700756156	0.025567074948282
chr11:77683710|77693611.1	-1.87630036363919	0.00664735227976948
chr11:77691159|77693611.1	-2.45757869442292	0.00778539283614002
chr11:77722688|77725699.1	-1.96582532606744	0.0404623328607352
chr11:83111113|83117197.1	-2.89105733006976	0.00389408265914528
chr11:85981745|85982003.1	-2.96588927915155	0.0142593543069114
chr11:86022367|86031611.1	-1.57724929490306	0.0307243401354928
chr11:90361559|90369252	4.99045531278022	0.0186398156560469
chr11:9203660|9207632	-3.00472049795927	0.0221156933068233
chr12:110018345|110029635	-2.82725538486116	0.0194287991841575
chr12:110395101|110396452	-2.84262962220162	0.01927343463804
chr12:112178931|112179397	-3.58164180528876	0.00208091581393747
chr12:112502144|112506422.1	4.90877207353915	0.0214265125000996
chr12:116230433|116237705.1	-1.67029469763854	0.0350078926916626
chr12:116230533|116237705.1	-1.55755801876043	0.0234769414085203
chr12:120557282|120557682.1	-3.2950351265927	8.24115549971033e-06
chr12:120782655|120784593.1	-2.11534275003425	0.00226203700144053
chr12:121780872|121781192.1	-1.49007497835401	0.0396033822545139
chr12:122340753|122341697.1	-1.56409713800047	0.0403467111143917
chr12:12244262|12244655.1	-2.87317984566601	0.0174344508819389
chr12:122511109|122515227.1	-1.73541130734909	0.0418127869200375
chr12:124419957|124457162	-3.326521623799	0.0171488981753987
chr12:12635777|12635974.1	-1.87045417277927	0.0448386506349968
chr12:128808788|128815070.1	-2.33911288568083	0.0364603235997481
chr12:1289852|1290012.1	-2.65637858000135	0.0140275958839309
chr12:132714858|132718120.1	-2.33265539031753	0.0297488235515977
chr12:133191489|133192003	-3.17634822620219	0.00380869415548179
chr12:2681654|2682612.1	-3.08576586305138	0.00153492116215911
chr12:2820086|2821792.1	-1.88242985605021	0.0136381975386434
chr12:28225795|28226199.1	-2.29580394878011	0.039949498909994
chr12:32607957|32611283.1	4.77200226676396	0.0269455711245998
chr12:42210355|42210619.1	-2.63570021115146	0.00562355114988522
chr12:42210355|42212484.1	-2.19316638649962	0.0237245263817711
chr12:42374863|42398994.1	-2.32178051386267	0.0288531366202108
chr12:42384940|42398994.1	-2.11722203402021	0.0226613501036111
chr12:44143525|44211387.1	-3.05505568403942	0.0343395116815445
chr12:46239679|46243314.1	-1.43654139412108	0.0384786868848537
chr12:46239679|46254936.1	-1.69276558682797	0.0255679386355273
chr12:47104113|47108164.1	-4.16501478829909	1.23616626910528e-09
chr12:50427762|50430570.1	-1.92582546332591	0.0444850033401635
chr12:51055835|51056502.1	-3.1711871472314	0.000792711719851032
chr12:51240343|51241116.1	-2.08964724065099	0.0471298024722013
chr12:56670275|56673065.1	5.25702407710102	0.0112356612745832
chr12:57395749|57398198.1	-1.88944048610153	0.0221336610113882
chr12:64648537|64649552.1	-3.08212793071379	0.000122317467952178
chr12:64864668|64866903.1	5.69875514792173	0.00442112451321111
chr12:66145841|66153448.1	-2.51141721184198	0.0358480276163119
chr12:89459638|89472275.1	-2.23470181985952	0.00765594565498846
chr12:94169153|94186473.1	-2.03408657309754	0.0128850706154019
chr12:98527886|98537572.1	5.14852762005239	0.0138504244257607
chr13:102622877|102627924.1	-2.08913799502284	0.0122950926939913
chr13:108243532|108251316.1	-2.30591156693449	0.023277869642774
chr13:113520616|113539507	-2.66335933476798	0.0417686639355746
chr13:113999585|114000932.1	-3.73338265598129	0.000221558211880669
chr13:114041000|114073837.1	-1.97005289529247	0.0159628798028802
chr13:114052052|114057474.1	-2.43515513109543	0.00831162459266967
chr13:114052052|114073837.1	-3.33203339890631	0.00399854690074531
chr13:114147992|114148962.1	6.84429959610944	0.000245298365798982
chr13:21387508|21391854	-3.10635463648899	0.00700990921034135
chr13:21413652|21425678	4.65232177558601	0.0329452616366366
chr13:27427092|27430621.1	-2.35360209103682	0.0103801436778991
chr13:28256292|28261458.1	-1.82835112635021	0.0264682496836171
chr13:31941308|31946181.1	-3.07357416641214	0.00319829676311849
chr13:32732101|32735330.1	-2.18890112545728	0.00869207396413287
chr13:37040405|37051583.1	-2.16866424854849	0.0091811658873194
chr13:40826506|40855815.1	-2.15543275475587	0.0181395999621851
chr13:40836597|40855815.1	-2.12841829808185	0.0272214166187632
chr13:40942952|40943925.1	-2.97836378580014	0.00093621136519217
chr13:42953948|42970670.1	1.74449676389192	0.0477443534594191
chr13:45336536|45337388.1	-2.26451006232876	0.0409831361210158
chr13:45516143|45525051.1	-2.92622987298184	0.00188436031946198
chr13:45516143|45530780.1	-3.16800119441341	0.00045798515812959
chr13:49451553|49451909.1	-2.06853726295496	0.00357983889925749
chr13:50927407|50949505.1	-1.72893385529738	0.0121346239834156
chr13:50927407|50960171.1	-2.7862628297924	0.00715135595790162
chr13:77719532|77753358.1	-1.90504947847352	0.0117801381153451
chr13:99071510|99072508.1	-2.73333897596847	0.0236840815130851
chr13:99238427|99244624.1	-3.03571939955753	1.30913324813425e-05
chr13:99243832|99244624.1	-2.04258575585391	0.0420997577788287
chr14:102040236|102040673.1	-1.48814896087885	0.0317727716885747
chr14:102193463|102195120.1	-2.33641620025998	0.00371209802835764
chr14:22909483|22911403.1	-1.54274837171706	0.0233989714657302
chr14:24209890|24211829.1	-2.14499134579426	0.0419801042340395
chr14:30670256|30675065.1	-1.79164286120015	0.0204961817763264
chr14:30877572|30880734	5.82626549228867	0.00331830100643255
chr14:34862044|34862322.1	-1.47325356113358	0.0379827343235846
chr14:35126735|35127611.1	-2.62898172271261	0.00297664007707392
chr14:39154211|39158402.1	-3.34822528143407	0.00251202618597823
chr14:39158285|39159550.1	-3.17056298423182	0.00254061690690024
chr14:39276934|39279537.1	-1.8353931993773	0.00914547054022223
chr14:45118028|45130790.1	-1.67475013949168	0.0149084692146576
chr14:50150008|50150230.1	-1.65511987101265	0.0286828678278905
chr14:50199691|50204409	-2.85251716404075	0.0296281820002547
chr14:52511240|52544371.1	-1.76378615414816	0.0386962087003312
chr14:60149353|60153178.1	-3.96586118916381	0.000252624033518193
chr14:61721509|61721823.1	-2.28431385264984	0.00496448955459815
chr14:61744705|61745817.1	-2.67736904318051	0.0398042337593615
chr14:65561337|65629606.1	5.18455743560419	0.0129938052484252
chr14:65615978|65629606.1	2.99594623842792	0.0241035773741196
chr14:67685015|67690421.1	4.38749761505676	0.0486750088572964
chr14:71413948|71418196.1	-2.84902615775658	5.63157539353881e-05
chr14:71413948|71467247.1	-2.2149104875956	0.0367594249926871
chr14:71413948|71529370.1	-2.30988516474831	0.00454431366850073
chr14:75109685|75110371.1	-1.78048174224266	0.013120586150064
chr14:76166663|76180849.1	-2.07438493027844	0.0222227994714186
chr14:80743075|80761613.1	6.4420712564569	0.000779099561510997
chr14:80743075|80778046.1	2.10136467967688	0.0401981359297874
chr14:85978970|86070967.1	-3.61731226346158	0.00190145151818926
chr14:86028369|86041833.1	-2.331093818031	0.00636744248904847
chr14:89161701|89162969.1	-2.67577655250347	0.00129339552161664
chr14:89411934|89412490.1	-2.19463810132287	0.0156704222928429
chr14:91338005|91343657.1	-2.09269664163755	0.0300983688453942
chr14:91342380|91343657.1	-2.75036895449231	0.000442541949078467
chr14:91797785|91802421.1	-1.97474702649981	0.0238530970549313
chr14:99231345|99257836.1	-2.61388400004255	0.0050494758901942
chr14:99231345|99257839.1	-2.73766463782094	0.000999367567213574
chr14:99257471|99257836.1	-2.67757948087501	4.21828048307902e-05
chr14:99257471|99257839.1	-2.69624509614348	3.1373456977975e-05
chr14:99458279|99465813.1	-1.75911367900237	0.00887000009857516
chr15:100330889|100334180.1	-3.57460032454147	2.17097903383206e-05
chr15:100564692|100565265.1	-1.40332198885367	0.0428279585284847
chr15:100564692|100566453.1	-3.70990935291948	0.00156362004587685
chr15:101235082|101235577.1	-1.64941646961494	0.0406356781641938
chr15:22278818|22282869.1	5.19369026095486	0.0127124927591673
chr15:23008699|23010133.1	-3.23939764480529	0.00838186025890239
chr15:25354353|25360527.1	-3.74171528668105	0.000836892067496408
chr15:25405461|25411971.1	-1.40961568782345	0.0396653465353694
chr15:30474356|30484686.1	-3.74079399328234	0.000230752652117419
chr15:41085369|41087682.1	-2.0229692551377	0.0351452741494972
chr15:42827928|42840433.1	-1.87205004185664	0.0263333748106237
chr15:44331988|44338317.1	-1.71070777584639	0.0186710634770541
chr15:44484224|44490999.1	-3.58033637462623	0.00132407307875738
chr15:51781044|51782828.1	-2.97300608135232	0.00235278597231907
chr15:51900155|51902036.1	-2.59937064704343	0.0308691202205556
chr15:55348332|55348725.1	-2.5429756880455	0.0334057618017092
chr15:58912563|58916999.1	-1.80421911948698	0.00766553156167207
chr15:59030804|59031702.1	-1.80723593023597	0.0433719947294556
chr15:62007308|62013992.1	-1.95360966946706	0.00464847370923674
chr15:63532647|63537156.1	-2.70662451090848	0.000208143011213579
chr15:64118117|64118854.1	-2.05369437851973	0.0282095857996893
chr15:64499293|64500166.1	-1.4681558800043	0.0316627363296174
chr15:68141946|68146700.1	-2.67004892692444	0.000825614923987315
chr15:68175637|68176654.1	-2.66866609072381	0.00715330051256525
chr15:76287846|76292700.1	4.81969508082758	0.0251218954952727
chr15:77365163|77388802.1	-2.56096994038215	0.0171819853055067
chr15:84687625|84691644.1	-1.64091229997898	0.0432947557672892
chr15:85113873|85117839.1	-3.18045545075686	0.0207579605508133
chr15:85113873|85121014.1	-3.104077501113	0.00212974303311225
chr15:89871475|89889140.1	4.49696290870135	0.0416427469548246
chr15:90439332|90443478.1	-1.42981961294012	0.046010376429921
chr15:90486954|90487582	-2.31144351529674	0.0394502259597097
chr15:98707562|98708107	-2.09180057680453	0.0457233408487262
chr15:99598430|99633173.1	-2.96509096780686	0.00448932549865166
chr16:10419581|10473989.1	-2.75405325304524	0.0030258103262387
chr16:11721577|11736233.1	4.44529285119106	0.0447274585747156
chr16:1314020|1320517.1	-2.85295395812764	0.000297343971436906
chr16:14627106|14627336.1	-1.71215505135147	0.0456610755764518
chr16:17258988|17259498.1	-2.23909225004775	0.00577221133732986
chr16:22349279|22349849.1	-1.64004613993748	0.0352448423649527
chr16:27211146|27215008.1	-2.79835886038132	0.0139305461409321
chr16:27213585|27215008.1	-2.21186261193502	0.00456088813087424
chr16:30713208|30713711.1	-2.511414542161	0.0260067786662661
chr16:30728966|30729572.1	-2.11942586928533	0.00356406084014222
chr16:31090775|31091342.1	-2.06923831030566	0.00341778533037781
chr16:31361836|31362753.1	-2.19060125855149	0.0159886988022905
chr16:346148|347106.1	-2.42944359835851	0.000824674174261651
chr16:4405491|4413404.1	-2.08914906068653	0.0251216441916776
chr16:47497399|47515601.1	2.41300771435118	0.0377173100574457
chr16:50786855|50793664.1	-1.82696247883145	0.0471351292263905
chr16:53154447|53157541	-2.87579623060223	0.00827334854056243
chr16:53439016|53447106.1	-2.53446009976484	0.00492489889076328
chr16:58559804|58560362.1	-1.75306209544907	0.0115086789873655
chr16:71738942|71739341.1	-3.689175373062	0.00287659076332765
chr16:78424870|78432752	-3.11450892267497	0.0309541632161139
chr16:85633914|85634132.1	-1.51591020091903	0.0305702635621906
chr16:88485939|88489153.1	-3.5199342114168	0.00105056157250967
chr16:8858350|8859335.1	4.74458017464824	0.028222967641951
chr16:8920359|8930397.1	-3.12538852389089	5.0584861713104e-05
chr16:89418284|89431326.1	-1.89143555352917	0.0469345262859179
chr17:12081356|12095694.1	-2.77035986593299	0.000477295446728686
chr17:14074323|14077056.1	-2.76649982443216	0.0224452472337436
chr17:18865469|18865952.1	-1.67394612517173	0.0453155690119374
chr17:20204333|20205912.1	-2.21228458918694	0.00190351871338487
chr17:29285710|29287716.1	-2.69507334315487	0.0258043902722213
chr17:29684563|29703062.1	-1.62424087823582	0.0287444884931504
chr17:30803901|30804108.1	-2.36989123583704	0.0101325463681503
chr17:31940286|31973231.1	4.67483322070867	0.0316395558963462
chr17:32030656|32031458.1	4.89720163842721	0.0218634062512502
chr17:4066447|4072756.1	-1.92259061524973	0.0331853224340332
chr17:4242256|4242448.1	-2.73000828795786	0.0228083256634035
chr17:43378752|43379262.1	-2.60722092359168	0.0211476458681901
chr17:47326226|47345098.1	-2.72960131187415	0.0165135045905127
chr17:48396680|48412537.1	-2.30883906554764	0.0395080258554635
chr17:49311312|49312042.1	-1.8719184464269	0.00596623271975175
chr17:49719760|49720436.1	-2.50819611244948	0.01960359714258
chr17:5365122|5368468.1	-2.04625759325888	0.0414062796395467
chr17:55401469|55403868.1	-3.08884660445526	0.00156402274123806
chr17:56844019|56848065.1	-2.19942956155437	0.0237269880669843
chr17:59731421|59738947.1	-1.64905899134311	0.0213014771491694
chr17:59764971|59773885.1	-2.16466149088425	0.0109041309617482
chr17:61984171|61985090.1	-1.73994635690654	0.0240459852057432
chr17:62010550|62063301.1	-1.97705453397353	0.0333820571720714
chr17:65549520|65558736.1	-2.6398506440385	0.0141357558299111
chr17:67891844|67894165.1	4.95686395024373	0.0197692159438062
chr17:67945409|67975958.1	-1.76112744597861	0.0113187614067088
chr17:68209654|68210465.1	-2.16857594622981	0.0127074597301802
chr17:75042181|75042659.1	-1.87256434918515	0.0328254325958003
chr17:75242336|75243570.1	-1.98214411032455	0.00745005488021218
chr17:76767386|76769871	-4.00882125012107	0.00113520999611067
chr17:77402059|77402703.1	-3.08156663002122	0.000611049289193417
chr17:78004170|78031842.1	-2.54535861332943	0.00124555841821012
chr17:78079395|78083166.1	-2.42293091753326	0.0233398278439184
chr17:78400735|78401057.1	-2.58174104171141	0.00510792630769952
chr17:82756165|82772507	-3.55285407555323	0.00665103691670505
chr17:82905936|82911789.1	-3.37625828399048	0.000457236492412675
chr17:83048471|83048785.1	-2.41073373985902	0.0244775379798075
chr17:83084938|83085323.1	-3.84504459994435	3.04924083482619e-09
chr18:196637|204692	-2.57308938897395	0.00533109151007754
chr18:23506970|23509279.1	-2.564832984578	0.022743407908583
chr18:23507985|23509279.1	-3.20790763306509	0.00159990414744413
chr18:24143091|24143413.1	6.57846443508252	0.000544024542380254
chr18:2724899|2752552.1	-2.12295035902426	0.0443315458479386
chr18:46118181|46128837.1	-4.05306441553314	0.000558322856423358
chr18:50918110|50932360.1	4.5151897697096	0.0404211602626289
chr18:54271360|54274090.1	-1.69934038242365	0.0394850672523118
chr18:54271360|54277853.1	-2.81379051040047	0.0200605708067671
chr18:58578814|58580548.1	6.12955674081455	0.00164444957124865
chr18:58659863|58660570.1	3.07605957612016	0.0201976632424751
chr18:58709378|58735329.1	4.4102683720482	0.0469435144983012
chr18:79277054|79307234.1	-2.54870066069679	0.0484988207447471
chr18:79410403|79411501.1	-2.52586531112629	0.00151537587838196
chr18:79695225|79704917.1	-3.42151325557653	5.01053259520202e-07
chr18:79695225|79718016.1	-3.97835127014571	0.000152983449449706
chr18:8076455|8088851.1	4.63599434621391	0.0336190375154728
chr18:9182382|9195698.1	-1.93692780490897	0.0245559405781115
chr18:9182382|9211784.1	-2.2859934301805	0.0305388114251879
chr18:9583117|9595102.1	-2.13131274069477	0.00434481518483829
chr18:9583117|9595153.1	-1.80424054616802	0.026931999105719
chr19:11335447|11335783.1	-2.84784744306832	0.00186800677782984
chr19:1271329|1272051.1	-2.97146824064984	0.0239410098935985
chr19:1417500|1422396.1	-2.21867238507516	0.0470318600326664
chr19:17101660|17102557.1	-1.52644164688467	0.0476154068535899
chr19:18175040|18175697.1	-3.3230323961236	8.51252004773485e-05
chr19:18342859|18343415.1	-3.36570475428257	0.00032618883008264
chr19:19296989|19297344.1	-2.3702141875632	0.0191036635012973
chr19:1969508|1969959.1	-2.96010634633647	0.0149182287330987
chr19:20645684|20646405.1	-3.41922123057741	3.63519695950133e-06
chr19:21405129|21405856.1	-2.3884750024058	0.00104709472825233
chr19:2189732|2194577.1	-3.55270967529589	0.000243219393361459
chr19:21987216|21988909.1	-5.32158016734837	8.07526450039066e-08
chr19:22072809|22073564.1	-2.35788212238957	0.0017715431273142
chr19:29971193|29986417.1	-1.89985641571342	0.00861224507687712
chr19:29985223|29986417.1	-1.68775053249104	0.0130592901788445
chr19:34221507|34221738.1	-2.91898922933793	0.0107063728603207
chr19:3660966|3662001.1	4.65658119546142	0.032567041429317
chr19:3660966|3667353.1	-4.18168095037301	0.000132399324903665
chr19:37199400|37207254.1	4.59687749278304	0.035691692308451
chr19:37425868|37426378.1	-2.65807882763671	0.0183984956370002
chr19:38343580|38344368.1	-2.89091868754619	0.0168002894821832
chr19:39453356|39453521.1	-2.91563324774273	0.00091143182800264
chr19:39457675|39459960	-2.55692854900829	0.0479943370866753
chr19:40034950|40036626.1	-2.19782353463476	0.0143305058023758
chr19:40583398|40583717.1	-1.46666445903718	0.0355442708657698
chr19:41268223|41281275.1	-2.67683789697298	0.0261290909489215
chr19:42099527|42099821	-3.68025684897543	0.00161470115889585
chr19:45264684|45266281.1	-2.1030742154317	0.0443136753471547
chr19:47362476|47362693.1	-1.90471427020401	0.0217209769389928
chr19:48149763|48151339.1	-3.24007615251995	0.00497334490579918
chr19:48633444|48633655.1	-1.55900073380706	0.0466548852314782
chr19:49599272|49601918.1	-2.57566470909547	0.0468534634040506
chr19:5039836|5047669.1	-2.16323393145292	0.0398511749453049
chr19:55098784|55103568.1	-2.7491838334312	0.000853998865332664
chr19:57455653|57456182.1	-2.2348215375889	0.0145886569173032
chr19:5941621|5957973.1	-2.40792795055736	0.0176904055433722
chr19:803561|805187	-4.25083907438281	3.72385655488641e-05
chr19:8548036|8548317.1	-2.03372695582959	0.0146320030768645
chr2:112299849|112300029.1	-1.9470732315248	0.00462962065506907
chr2:113939959|113951845.1	-1.96234768691742	0.0483992710806157
chr2:119926598|119945240.1	-2.29791545404596	0.00608113013833814
chr2:121757240|121758806.1	-3.34138480067279	0.00170295970490525
chr2:128164730|128171284.1	4.59348894813487	0.0360279236846035
chr2:147972739|147975975.1	-1.94487883142884	0.00552705056297876
chr2:185483034|185502739.1	-3.56089444152401	0.0021246997856942
chr2:186081330|186099830.1	-3.68589015558999	0.000982533678252888
chr2:190655977|190673152.1	3.56255645970002	0.00637412268285107
chr2:190659158|190673152.1	1.79848127886998	0.0430811757931701
chr2:190900564|190931637.1	-2.19153923342856	0.0491121743524255
chr2:195680032|195681050.1	4.9001724774639	0.0218306145073565
chr2:197078703|197090032.1	-2.17946179233547	0.0197793396150028
chr2:199368605|199433514.1	5.79256583982537	0.00363373890607282
chr2:201022059|201024039	-3.7717273512738	0.000729865024011268
chr2:201129729|201149835.1	-2.2838165391597	0.0418969116022944
chr2:201145378|201149835.1	-1.92754668894577	0.00423987446729268
chr2:202297379|202297906.1	-1.54202082563758	0.0473034991165235
chr2:202755538|202759353.1	-2.15623545125284	0.0314464933701246
chr2:202917877|202961426	-2.96903741160377	0.0385609597163431
chr2:207724800|207742342.1	5.4660098222434	0.00744744879768011
chr2:208285726|208288818.1	-2.21228272213838	0.0157949767834175
chr2:213310059|213364145.1	4.50062126700797	0.0413947657969517
chr2:218656150|218656463.1	-2.88341831212219	0.00407514544862904
chr2:230269532|230270639	-2.58332258289452	0.0312214439786539
chr2:230357805|230361697.1	2.14637603630847	0.0196103579517978
chr2:232787150|232796221.1	-2.11995915130078	0.00915720654809046
chr2:233388257|233390483.1	-2.60390811360468	0.000589564444529825
chr2:233449959|233452060.1	-2.97293453544683	0.0375427015739206
chr2:239990074|240014860.1	-2.11039452293946	0.0443997770281338
chr2:24135119|24147086.1	-1.6604172971388	0.027842660449627
chr2:241704653|241712071.1	-2.94435311925827	0.00478538871846517
chr2:24510969|24584560	-2.51236304821647	0.0353948107375106
chr2:26364302|26373629.1	-2.72247233563378	0.000511396800167891
chr2:30525587|30533314.1	-1.6255313858245	0.0487546355918135
chr2:31917926|31943383.1	4.75907083904168	0.0277184505438462
chr2:32377588|32395593.1	4.41304469863154	0.0468697490709499
chr2:37316237|37317179.1	-3.76394455873726	2.57784855266406e-07
chr2:38585644|38591648.1	4.58531059171503	0.0365093613422536
chr2:44201186|44209327.1	-2.672659845047	0.0098183259840222
chr2:44209210|44218537.1	-1.92926463749508	0.0152065938581181
chr2:53887259|53893799.1	-2.49693036004163	0.0369759092125588
chr2:58198594|58232112.1	-2.44561205242275	0.00667351377927926
chr2:61873002|61876234	-2.61038477287095	0.0452028033532651
chr2:63433745|63439871.1	-2.80088578544846	0.00687426802966962
chr2:68490190|68513680.1	-2.4462933670156	0.00541825504201695
chr2:71396141|71418639.1	-1.62637272511416	0.0205408425915055
chr2:72718103|72733118.1	-2.23185021771114	0.00124675999892811
chr2:72731007|72733118.1	-2.2636081406949	0.00198384761182306
chr2:74046278|74048411.1	-2.57636684455429	0.0482786734965897
chr2:8243565|8287558.1	-2.56647140909326	0.0171392517948641
chr2:84870225|84870785.1	-3.53860648447961	1.21265513361249e-05
chr2:85861181|85863485.1	-2.52583455363414	0.00244026137865466
chr2:86765027|86766024.1	-2.56885239769088	0.0323473347892768
chr2:99186177|99195756.1	5.20652340163106	0.0124182271143334
chr20:17955365|17957037.1	4.90820032042588	0.0214351080098627
chr20:21339044|21344208.1	-1.79218492080887	0.0363696349734672
chr20:21590945|21591247.1	4.66084988632188	0.0323523781164161
chr20:33619517|33623296.1	-1.7475133574174	0.015811014758538
chr20:34031522|34033318.1	-2.2567262977542	0.0079030727378086
chr20:35858302|35871829.1	-2.84085639892376	0.00151027271022701
chr20:41512846|41533570.1	-2.36455358217369	0.0470198076873099
chr20:49165997|49174269	-3.37799845611755	0.00917303085539901
chr20:50902017|50904001.1	-4.49236285254699	4.51579542868594e-05
chr20:51516784|51523596.1	-2.36730236643703	0.0126348797114529
chr20:53953432|54028972.1	5.38550716403974	0.00870230940136806
chr20:53985287|53996050.1	4.64186807011024	0.0332873126942546
chr20:53985287|54028972.1	4.63682554909893	0.033631293393754
chr20:54028392|54028972.1	4.98226683172358	0.0188918352438372
chr20:54157169|54171670.1	5.72145909006029	0.00421583997485101
chr20:5565017|5570239.1	-3.01871376777566	0.0213590788043381
chr20:56381433|56384324	4.96352199603112	0.0194995621310984
chr20:63775678|63790790	-3.25226867410977	0.0136050745711344
chr20:63928335|63931022.1	-2.851518928294	0.000406122721680259
chr21:15762891|15766141.1	-1.83688641520848	0.0063909742547892
chr21:15791502|15842540	-2.85800503173789	0.0298445300560056
chr21:24485623|24488309.1	-3.69782597537049	0.0054069004657861
chr21:29326059|29329693.1	-3.17226692016306	0.00164411735178132
chr21:34102835|34125480.1	-2.63068342540993	0.00776043557017091
chr21:37420299|37421866.1	-1.86664753698248	0.00782786523402056
chr21:42994848|42995343.1	-2.91639176980314	0.00743323688480829
chr21:44855210|44861271.1	-2.26961039269926	0.00191479822147073
chr21:46643535|46644488.1	-2.204773282415	0.0191447365900065
chr22:32478981|32479275.1	-2.13844303276755	0.00206553852330371
chr22:41338313|41339191.1	-2.33839264811378	0.0175665323321232
chr22:42411407|42411736.1	-3.0592943239007	0.0120309241511498
chr22:43039780|43046573.1	-1.71315691517052	0.0497877635775197
chr22:45330603|45332710.1	-2.91217531223397	0.00756913135756226
chr22:45689712|45718493.1	4.69081180103996	0.0308544064960163
chr22:46343262|46346544.1	-2.22444522968835	0.045104510621374
chr22:46707843|46721015.1	-3.5922885753224	9.35326809520675e-05
chr22:46974290|46997709.1	-2.09763241983359	0.0357782349880832
chr22:49775591|49777813.1	-3.85771190918679	0.000600299005044577
chr22:49775591|49799119.1	-3.14958979845805	0.0301221915536092
chr22:49787390|49804360.1	-2.84840598447098	0.028149091285205
chr22:49794034|49804360.1	-3.34146893663788	0.00254888582329771
chr22:49797805|49799119.1	-4.23935262614866	4.99959789174412e-08
chr22:49797805|49804360.1	-3.35346252668224	0.000113743932993625
chr22:49804204|49824331.1	-2.87175500632484	0.0117516717738385
chr3:119503532|119513719	-2.04682040007404	0.0415323097426176
chr3:119503532|119517315.1	-2.1827995318942	0.00788497608539608
chr3:123931102|123949132.1	4.59852794776634	0.0357093523136691
chr3:138570318|138571356.1	8.37165620657772	2.80056442996537e-06
chr3:138570318|138572932.1	2.94731350314683	0.00489429701215476
chr3:138570318|138572984.1	6.06946680125814	0.00184956396327053
chr3:141260123|141287453.1	-3.30794221739087	0.0117205439258977
chr3:141553857|141559995.1	-1.47824564746629	0.049506459528305
chr3:142093061|142101841.1	-2.12846601216549	0.023206376917783
chr3:143795001|143832221.1	4.77575054210342	0.026965363962743
chr3:149846011|149872154.1	-1.92178997320607	0.0116902731065021
chr3:149846011|149921227.1	-1.37727993577512	0.049021245980011
chr3:149895473|149921227.1	-2.22495553764176	0.00672825627651475
chr3:151116338|151127984.1	4.67840268148438	0.0316873938018411
chr3:152414941|152432920.1	-2.16777439669701	0.00359051400509143
chr3:152445282|152447773.1	-2.34918100176434	0.027921197882789
chr3:15411245|15415942.1	-2.2133911445225	0.0131524478735886
chr3:155829688|155834041.1	-1.91713878444832	0.0209940594690487
chr3:16301626|16302748.1	-1.95711145851026	0.0261843150043355
chr3:16301626|16303592.1	-3.36691978259655	0.000161692390739965
chr3:170122591|170122744.1	-3.20681637327028	0.00888958718447719
chr3:172247533|172251541.1	-2.28654209351525	0.00207281338540085
chr3:17622648|17625224.1	-2.34884876477087	0.0493920972309491
chr3:179203544|179204588.1	-2.12384681350863	0.00764674225836591
chr3:179592644|179598771.1	-2.44578341114337	0.040489746874604
chr3:179764002|179765848.1	4.87440940473688	0.0227765033587909
chr3:183205876|183207823.1	5.84232749322936	0.00319111433818789
chr3:18378170|18420991.1	-3.54806944326628	5.85648265075597e-06
chr3:183833492|183833825.1	-2.33813324067606	0.0496321078299402
chr3:18415111|18420991.1	-2.96881231428451	0.00220646239472047
chr3:18463480|18527326.1	-4.60760725732011	2.94585860374746e-06
chr3:195381009|195392147.1	-1.61189493385835	0.0242735168201808
chr3:195878253|195888606.1	-2.31423605358357	0.0135652505553008
chr3:197051577|197069260.1	-2.42053716746562	0.0427519210222588
chr3:197081051|197085756.1	-3.24956998617627	0.00789464819481897
chr3:20071584|20072459.1	-3.88858413827059	0.000911112725421697
chr3:32544876|32545965.1	-2.45585997699654	0.0401373779740196
chr3:33812072|33822082.1	-2.21320870628112	0.0181059415468752
chr3:37249698|37273601.1	4.40558594811431	0.0476077750757992
chr3:43299754|43303792.1	-2.71046739208296	0.000108233162365933
chr3:47169169|47169396	-2.97197675859882	0.0096087506864108
chr3:47675475|47678311.1	4.40512987922432	0.0477287286693414
chr3:51541498|51552063.1	-2.56478964573028	0.000148467641176112
chr3:52412811|52414587.1	-2.1672219884894	0.00402760002986444
chr3:52737586|52741499.1	-1.84545312470218	0.0219462626011111
chr3:53290791|53292827.1	-2.29340897615679	0.040414292674984
chr3:56592970|56594028.1	-1.43521955524142	0.0381891605147017
chr3:60011371|60014264.1	-4.2308455265167	6.47074807251291e-05
chr3:66405198|66462509.1	-3.86944980894516	4.16467280821112e-05
chr3:67495798|67508903.1	6.79941983675812	0.000280715816497656
chr3:71015549|71053773.1	-3.49333042767474	0.000297872417233954
chr3:71041328|71053773.1	-2.8710807239996	4.79821048755311e-05
chr3:71690010|71701096.1	-3.41958329937024	0.00135282368962127
chr4:102580535|102582957.1	-1.83553200520345	0.0166240852574037
chr4:102714438|102726683.1	-1.54172294106628	0.0402561832043587
chr4:102722871|102726683.1	-2.06562810348715	0.0152019718347845
chr4:104518577|104519454.1	3.15339058392805	0.00867090155913828
chr4:105424196|105456745.1	-2.18935711055262	0.0160367392873263
chr4:107682015|107701285.1	-2.38151854841272	0.0339689491385143
chr4:107944970|107947537	-2.54856579652782	0.0486162012521058
chr4:109462901|109473186.1	-3.03226238485386	0.0126096533639518
chr4:109462901|109481781	-3.53526969991946	0.00700634851853603
chr4:122170615|122175914.1	-2.3768790100603	0.0465112179036287
chr4:139116649|139139497.1	-2.75391716661683	0.00621505088419911
chr4:139125164|139139497.1	-2.09627023330918	0.00944957821418549
chr4:139137630|139139497.1	-2.20315416774859	0.0291998870029387
chr4:142402938|142462726.1	4.78549419094364	0.0264733269469796
chr4:143543509|143543972.1	-1.69935377282404	0.0120190517468343
chr4:152411303|152469988.1	-1.83622012713978	0.0273150324413308
chr4:166039339|166078030.1	5.26380466782706	0.0110588488406319
chr4:166055076|166078030.1	4.5067752581368	0.0407227087723022
chr4:185418441|185418770.1	-3.43501271409539	0.00305264624434741
chr4:22401431|22402799.1	7.46926144594666	4.08513120304012e-05
chr4:2490337|2497121	-2.57420356140369	0.0169091982190387
chr4:2949934|2951245.1	-2.08902803354063	0.0477763775826502
chr4:2956670|2957740.1	-2.95657356191405	0.0391974984695179
chr4:36107565|36121326.1	-2.50063381303286	0.0267651181952772
chr4:39837856|39842056.1	-2.64612452743965	0.0101193945453849
chr4:42551198|42556040.1	4.62249940688052	0.0343609327106901
chr4:42616033|42627109.1	5.25433938963534	0.0113002263563016
chr4:48369849|48394653.1	-1.89727665688064	0.0470966780854971
chr4:51863437|51877854.1	-2.46273969007513	0.00107065093003771
chr4:51863437|51891851.1	-1.87873548422872	0.0121770267434887
chr4:5663107|5665649.1	5.41641699994316	0.0081838140628877
chr4:6923373|6924111.1	-1.78048803473476	0.0180555987555466
chr4:6994184|7001251.1	-2.35193135891849	0.00605691639789945
chr4:73085249|73092300.1	-2.05067620279002	0.0079708747500343
chr4:77742141|77776392.1	-2.85423364332334	0.018446566862865
chr4:77756862|77776392.1	-2.03950148168434	0.029656549877185
chr4:78826037|78851056.1	-2.38461551745684	0.0146215234713537
chr4:82856952|82857764.1	-2.80734998588914	0.019923212258708
chr4:86764593|86767976	-3.11626217349907	0.00224340048850513
chr4:87046166|87047594.1	-1.66909367626984	0.0248815383582016
chr5:103096541|103097781.1	-1.61865537842987	0.0262422675064947
chr5:10415488|10417404.1	-1.70684262171083	0.0310040626873912
chr5:1057471|1065478.1	-3.12749591197725	0.00297588483077026
chr5:1060344|1065478.1	-3.66707238165649	0.000399802795878601
chr5:108798124|108798389.1	-3.08450581713529	0.011648014941382
chr5:109713520|109729513.1	-2.04515438296107	0.00516625675198465
chr5:131677703|131709272.1	-2.16086405795884	0.0034389525738154
chr5:134158455|134174022.1	-3.04069208769072	0.00567807657426509
chr5:137985257|137988315.1	-1.45435210794014	0.033125748328465
chr5:142885298|142932125.1	-3.37849225569664	0.000647600625383939
chr5:143037196|143057747.1	-2.46995528835688	0.0153779845420493
chr5:143054439|143057747.1	-2.19001321423906	0.00437963264525754
chr5:143399656|143400852.1	-1.75867262654107	0.0193230843558444
chr5:157294783|157296774.1	-2.50290135727833	0.0363963434861462
chr5:171391305|171392978.1	2.66171495766497	0.0482582031896681
chr5:173108624|173112379.1	-2.3563814937757	0.00842818654499035
chr5:179560025|179577136.1	-3.33765369010868	0.0017378013129359
chr5:34179013|34182867.1	-2.53047214617181	0.00256354529753443
chr5:38990949|39003622.1	-3.05119665486016	0.000112163957918879
chr5:39002535|39021136.1	-1.78860145948467	0.0460666929169927
chr5:50274988|50411383.1	-2.25184101384061	0.00702416271781826
chr5:50399107|50411312.1	-2.42487315751231	0.0428622767623116
chr5:50750151|50763242.1	-2.46916114792722	0.00293117129943187
chr5:50778069|50797233.1	-2.25434258846563	0.00450391510538234
chr5:55697846|55704434.1	-3.69667072403614	0.00285430967844756
chr5:58988493|58993465.1	-2.1195199875072	0.0206430035798634
chr5:65567513|65572286.1	-1.4680174640784	0.0420271242597734
chr5:65680494|65685472.1	-2.40695416109892	0.0144458805263194
chr5:65988635|65994864.1	-1.46489029383223	0.0378745605009811
chr5:66012049|66014725.1	-1.99284759252801	0.0102613583330989
chr5:69355649|69355953.1	-2.49467278937874	0.0373305092206749
chr5:73058433|73077493.1	-3.4204671831867	0.015290036131824
chr5:73074742|73077493.1	-2.64519376483514	0.000577269000696539
chr5:76441393|76462314	-2.23502005084549	0.0451252796240287
chr5:77046347|77048987.1	-1.9937952567929	0.0187545916075727
chr5:79618647|79620083.1	-2.62656135404972	0.00367385045249515
chr5:79656958|79669028.1	-3.82652152250958	0.00013648996352637
chr5:80146090|80147284.1	-3.51709089647616	1.49192767495207e-05
chr5:83537007|83542268.1	-1.79238795318808	0.0320012610763309
chr5:93958777|93964523.1	-2.83771894181569	0.0296369431282587
chr5:94628811|94630743.1	4.59764018408832	0.0357816912654095
chr5:94643273|94654752.1	-1.53859161793404	0.04559774446092
chr6:100766565|100767345.1	-2.98358263649043	0.00639635162349301
chr6:104744160|104750472.1	-2.12239018511086	0.023930745494605
chr6:107744949|107772386.1	-2.49751176530672	0.0199728952837377
chr6:111262257|111263946.1	-1.63479924856363	0.0413416444106485
chr6:116689320|116692392.1	-1.58317762718236	0.0201368004350163
chr6:116698704|116705160.1	-1.7324622203944	0.0144632997389403
chr6:118448404|118449870.1	-2.09699031477296	0.00885939279757181
chr6:118523802|118566316.1	-3.12044620807074	0.0306593578667986
chr6:127812883|127813931.1	-3.68490543430926	0.000600995952825413
chr6:127855030|127901081.1	-3.70018813324299	0.000931547791741203
chr6:130154825|130184623.1	-1.92827968321641	0.0451198963327379
chr6:130184103|130184623.1	-2.28711246280701	0.00121424631554102
chr6:13639563|13644729.1	-1.57219700681289	0.0428576273257256
chr6:137871213|137871522.1	-3.49864371004543	0.000637184131220473
chr6:138941335|138944622	-2.62141464158901	0.0209398921637609
chr6:145888020|145894977.1	-1.63340206647619	0.0470718852565414
chr6:149369909|149379518.1	-2.43188213175054	0.00309198720393398
chr6:158707230|158725637.1	-2.46143140672403	0.0287857663373987
chr6:170317370|170323259.1	-3.09308365840189	0.011341152907248
chr6:170546103|170549113.1	-2.85298617560677	0.028312752111123
chr6:17674905|17675770.1	-2.89444972928872	0.00812706453405545
chr6:20546346|20548705.1	-2.20755898541625	0.0187287658354109
chr6:24865301|24869147.1	-2.66739827902238	0.0395907929290237
chr6:29889328|29943543	4.9791166065849	0.0353264279737953
chr6:29890246|29944616	-2.21862861312569	0.0223695740883046
chr6:3085259|3104315.1	-3.81345090996543	0.00118926016698548
chr6:34606555|34606904.1	-1.90946048355394	0.0342443479098596
chr6:53071057|53076543.1	-1.8968929850786	0.0241116430564329
chr6:57050774|57055797.1	-2.45479173261228	0.0052063443955617
chr6:63646527|63646795.1	-2.27189594806511	0.0326173521496212
chr6:7303550|7310029.1	-2.82879472000938	0.000393422479967127
chr6:73635382|73636707	-2.57619782450091	0.0226421856311365
chr6:75647731|75659407.1	-2.10045888013302	0.0149389469295879
chr6:75659262|75678927.1	4.58530878018493	0.0364646361459471
chr6:75702645|75703072.1	-1.52558006735694	0.0375583076622814
chr6:79060478|79060818.1	-1.97849031511122	0.0157261024831309
chr6:83398367|83407901.1	-3.10753767567887	0.0105696193009241
chr6:90249689|90271941.1	-2.80187080654652	0.000470272965282674
chr7:102227367|102227669.1	-2.8372619970719	0.000554106875129688
chr7:103025063|103029418.1	-2.75262708158525	0.00760246725214174
chr7:116110708|116112038.1	6.76277401790495	0.000411951961535586
chr7:12224226|12229819.1	-1.93951798932504	0.0244357514971826
chr7:135577796|135593192.1	4.55889233620982	0.0378681952122336
chr7:139053451|139054095.1	-2.33630774165952	0.0496489706704707
chr7:139053451|139055295.1	4.59799084324964	0.035686416463186
chr7:140776912|140808995.1	-1.98475735371592	0.0276244922833618
chr7:141636960|141649333.1	5.45650389131726	0.0075205625508201
chr7:152309966|152358675.1	-2.46440250694722	0.0397329965946725
chr7:158759486|158773396.1	-2.67410354976788	0.00939855331971539
chr7:17890363|17897446.1	-2.0349498002051	0.0356745483561735
chr7:1898200|1936897.1	-3.92453260998553	0.000106875779628435
chr7:2229984|2230727.1	4.50910557657417	0.0408546461563399
chr7:23611171|23611553.1	-1.40191205686261	0.045335236340096
chr7:24623666|24641868	-2.52287671447826	0.0137901119616364
chr7:24623666|24650712.1	-1.76271772380402	0.0438619713175784
chr7:24623666|24668660.1	-2.31527820051252	0.00589785502148774
chr7:24623666|24680520.1	-2.95403543343858	0.0146411938742966
chr7:2524695|2526921.1	-3.16723547236514	0.000472044590531926
chr7:26206368|26208555.1	-3.35785623391956	0.0165694737211644
chr7:27629371|27649633.1	-2.45041013631586	0.00131997130021383
chr7:27785163|27785489.1	-1.52100276212017	0.0416867161250799
chr7:39987599|39988258.1	4.97848011284906	0.0190344974091811
chr7:43986192|43986677.1	-2.85110122822009	0.0060453310627246
chr7:44645327|44647759.1	5.244965408688	0.0115555734677836
chr7:4983671|4989177	-2.22998288304623	0.0224119377787811
chr7:50319048|50327757.1	-2.14172256681572	0.00123905534843657
chr7:56083278|56083715.1	-3.06557233202614	0.00775654192032031
chr7:64336259|64336982.1	-1.79813163770581	0.0447617771513512
chr7:65979399|65980409.1	-3.79918720035972	0.000452602707807692
chr7:6814764|6822364.1	-2.05913501735934	0.0173827387122846
chr7:6814764|6823360.1	6.33126689538402	0.000980444254960801
chr7:72830692|72831798.1	-2.65177612541263	0.00183348844768783
chr7:72830751|72831798.1	-3.28873392865445	0.00440353428934219
chr7:72890627|72891110	5.10739693591926	0.0149274880781383
chr7:73686636|73687095.1	-1.73982329395529	0.0325611150532819
chr7:92294889|92307656.1	-1.63769903838973	0.0351221999743405
chr7:99388039|99390012.1	4.60427209827613	0.0354149488827607
chr7:99908582|99909660.1	-2.99657658258494	0.00905272593999582
chr8:103430612|103435790.1	-2.33512637985038	0.0376296921870688
chr8:104068512|104148848.1	5.70822001085555	0.00454273057031511
chr8:115587001|115623758	-2.3468018119097	0.0488143199827331
chr8:131940499|131946633.1	-2.87060850919398	0.000345668324163914
chr8:132722040|132757294.1	-1.79281326225273	0.0302262059900145
chr8:134812610|134813169.1	-1.88768970923908	0.0316936737358155
chr8:140864312|140890769.1	-4.07403998083004	0.000178257908370519
chr8:17963101|17967170.1	-2.43721758366895	0.0412877886708869
chr8:2492872|2494091.1	4.84434305669299	0.0239933941985014
chr8:2595565|2596704.1	6.77073275259543	0.000300760550117216
chr8:27294080|27294310.1	-1.69105152858538	0.0285215583228479
chr8:30101898|30104486.1	-1.51102336123891	0.0293068865914631
chr8:38788704|38820635.1	-2.71482299551908	0.0120862290876695
chr8:38943789|38946221.1	-2.19960146594834	0.016066934392611
chr8:42048378|42049707.1	-2.06334893676648	0.00419590062917099
chr8:42906173|42930172.1	-2.26675204281145	0.0424718228919283
chr8:43059092|43064215.1	-1.71878245402757	0.0229750226747169
chr8:47394978|47407961.1	-2.79292617098015	0.00496259149534751
chr8:47396376|47407961.1	-1.65207725253768	0.0273913903608835
chr8:51860845|51861246.1	-2.20918368961302	0.000810442951940074
chr8:51860861|51861246.1	-2.69071532528066	0.003784990219947
chr8:60794986|60801593.1	-2.72730445897769	0.00264864992921544
chr8:66572482|66573506.1	-4.54200641486549	5.53328059066806e-07
chr8:66572482|66593194.1	-3.0962005452088	0.00317136392219847
chr8:66572482|66602523.1	-3.4353180984608	0.00522299047297185
chr8:66592440|66602523.1	-3.57041331416245	0.000351803897435924
chr8:66601698|66602523.1	-2.78317457488223	0.00166585132969226
chr8:668598|674047.1	-3.3688247035913	4.78183943208024e-05
chr8:67103037|67132080.1	-3.04586378089549	0.0336506354366382
chr8:67103037|67154136.1	-3.23360466408572	0.0191844802902279
chr8:67118248|67137603.1	-2.33452348730737	0.00407212434105688
chr8:70594506|70598255.1	-2.27955121414756	0.0323445198081393
chr8:72052539|72076627.1	4.79768740234915	0.026010305943998
chr8:81029996|81048864.1	-2.77398460991811	0.00742477454692591
chr8:8933853|8935790.1	-2.92842467920282	0.00367888597780835
chr8:8991548|8994254.1	-5.16249750109426	3.33655426338779e-06
chr8:96680443|96682076.1	-2.81905106907225	0.00941543338699512
chr8:98706467|98707311.1	-2.87658601642409	0.000418471606454381
chr9:100016322|100022226	-3.49593124143252	0.00871248508494799
chr9:100052417|100060172.1	-2.09348828701447	0.0467606186120725
chr9:100498765|100516771.1	4.56194217554758	0.0377432530518969
chr9:106972005|106984409.1	4.43766170744936	0.0452793432943909
chr9:109106508|109108570.1	-2.87465352658833	6.97018276647368e-05
chr9:110136127|110138539.1	4.65035138627783	0.0327889753434092
chr9:110972073|110973558.1	-2.84623723899017	0.0014545828231471
chr9:121161856|121166180.1	-2.11122235033344	0.00208133546943949
chr9:121171159|121171548.1	-3.49432506279138	9.77099268465137e-05
chr9:123757703|123769563.1	-2.02270810431879	0.0257240521103631
chr9:125326416|125330218.1	-2.83694290058587	0.0294873228733389
chr9:131506114|131506453.1	-2.15264845271841	0.00185276248492036
chr9:133412299|133412921.1	-2.401695202833	0.00605483496199652
chr9:19288596|19300331.1	-2.63861114221284	0.0281780283415646
chr9:19325939|19328162	-3.17331822927999	0.0287257512773638
chr9:26861066|26884885.1	-2.52274393046479	0.0106318362440673
chr9:33953285|33956146.1	4.82761956355169	0.0247313964754254
chr9:33960826|33996333.1	-2.65177364188361	0.0272610443790799
chr9:36352742|36353331.1	-2.41547642449668	0.0169955979081558
chr9:3647338|3651867.1	3.19411818699331	0.0155673878102345
chr9:37126312|37126942.1	-1.43750221352313	0.0415559991996963
chr9:37126312|37147445.1	-1.95241194966656	0.00664696713124627
chr9:4286038|4286523.1	4.60036455145444	0.0354827013176283
chr9:4823548|4833228.1	-1.78926442329461	0.040915532402835
chr9:4860125|4860901.1	4.65447650930497	0.0327430041487183
chr9:5801176|5805785	-3.65341279845676	0.00300312916563749
chr9:5968019|5988545.1	-1.73325734589058	0.0305472704504604
chr9:71740063|71740232.1	-2.13601379076771	0.0121607174696369
chr9:74816669|74816964.1	4.83855043068661	0.0245093099226096
chr9:74816669|74821837.1	5.29890779174339	0.0104315987299351
chr9:77214329|77227485.1	4.77705720398217	0.0268391627652611
chr9:77794463|77797648.1	-2.43173638139518	0.00256535023294792
chr9:83661777|83669327.1	-2.46575552144277	0.0040112444449972
chr9:83682951|83686155.1	-1.66420085178506	0.0211395437764907
chr9:83768818|83788678.1	-2.23383050397599	0.0344914164320756
chr9:85677436|85712566.1	-1.89591028360022	0.0277032595697904
chr9:85692689|85712566.1	-1.85358244576104	0.0183864404908184
chr9:93471141|93476338.1	-1.52529296779645	0.0308694955303661
chr9:96458379|96458541.1	-2.29886945940856	0.00335946115411441
chr9:96458379|96471094.1	-1.91797500827327	0.0465037871642558
chr9:97994631|97998678.1	5.2080158763464	0.0123572747874
chr9:98018289|98026451.1	4.56297529759419	0.0376774902641493
chrX:101041317|101042312.1	-3.07785602450012	5.71265085944507e-05
chrX:118542725|118546116.1	-1.65581776862799	0.0309008108835581
chrX:1285778|1290509.1	-2.63496400899592	0.00157425666721622
chrX:132281095|132283032.1	5.80457665448218	0.00347523674682179
chrX:14843660|14859334.1	-2.75236859476193	0.0224170382650425
chrX:148651999|148662768.1	5.40078844524941	0.00846083999016549
chrX:148661908|148662768.1	2.13598928780697	0.0262608717903718
chrX:150736595|150737448.1	-1.92288828706476	0.0378754244443512
chrX:155545096|155548224	-2.43250471979399	0.0413208820714252
chrX:1593444|1595532.1	-2.99471731368435	3.09307430314123e-05
chrX:2719661|2726373.1	4.49566470229674	0.0418133624614386
chrX:3817545|3818500.1	-3.50774447725782	0.00254942099131488
chrX:44524002|44527365.1	5.27071144522297	0.0109541799370302
chrX:51327721|51357027.1	-1.69541162990644	0.0167484459394858
chrX:53403566|53403893.1	-2.12698913819463	0.00714038074976367
chrX:54636235|54636427.1	-1.78818892424908	0.0453328138521083
chrX:78014662|78020398.1	-1.77281832575729	0.0299043637600892
chrX:80791854|80793772.1	-2.64840026674247	0.00129115733618424
chrX:85303406|85308216.1	6.11991679748706	0.00165228146573948
chrY:12912963|12914649.1	-2.28579281355657	0.0303122134378186
chrY:2953909|2961646.1	-1.44585816514766	0.0460918537789765
chrY:3079284|3102194.1	-3.56589244119074	6.11597102634761e-05
chr1:103565435|103575540.2	-2.69833731634574	0.00359792334399211
chr1:108148279|108161293.2	-2.7109033785774	0.00151494544244936
chr1:110891392|110892533.2	-2.27882558899681	0.00222752421806803
chr1:113829592|113834439.2	-1.74672484769354	0.0148053088045202
chr1:113848540|113855049.2	-1.72991637942424	0.0245853896237568
chr1:116760402|116764606	-3.16975601374381	0.0282796604143731
chr1:117402186|117405645.2	-1.55707914957831	0.0267833871102929
chr1:150230571|150231926.2	-1.95207515642323	0.0304848501253903
chr1:151166934|151167414.2	-1.93219895868719	0.00587309592845031
chr1:154234591|154235291.2	-2.3906311782649	0.0114720755965907
chr1:155521100|155521618.2	-1.56263020980963	0.0478983319072438
chr1:155853276|155853806.2	-1.58507600122022	0.0213730045518485
chr1:160323431|160332557.2	5.13756845974845	0.0141774642075203
chr1:171568247|171575128.2	-1.91933236175468	0.0173980892793958
chr1:174272414|174394145.2	5.28030078221092	0.010720076173821
chr1:194159280|194167715.1	-2.74743094331882	0.00549356424210556
chr1:197642711|197658369.2	-3.08134329736223	0.000151990418726195
chr1:205616478|205623891.2	-1.41461826438567	0.0420476255490498
chr1:20770930|20773610.2	-1.64906809340031	0.0189802062856507
chr1:20969474|20981227.2	-2.16570293505638	0.025811521738269
chr1:211778918|211793190.2	-1.64370289184022	0.0401942111971585
chr1:211783229|211793190.1	-3.65064502302404	0.00598236882403357
chr1:213117317|213129889.2	-2.00227917535831	0.0457508782547415
chr1:22078429|22091501.2	-2.05680801978383	0.0319496879996172
chr1:223954477|223962273.2	-3.03006044035157	0.00581783521896543
chr1:2302978|2304585.2	-4.18159823012028	4.29719578864785e-10
chr1:23030469|23050520.2	-1.77643163275928	0.0136414836688089
chr1:231795242|231818517.2	-1.57274930343729	0.0392661574252119
chr1:233090061|233095863.2	-1.92107494048019	0.0278310862625055
chr1:233217899|233227371.2	-1.69244203309805	0.0346586867846895
chr1:243695591|243843282.2	-1.94134163903522	0.0368623564597834
chr1:24514314|24514567.2	-1.88539232953347	0.00485982526652944
chr1:26453609|26463433.1	-2.20944515107171	0.0370634656522977
chr1:26942660|26943065.2	-1.66587321226455	0.0243622613999575
chr1:33294937|33295305.2	-1.60410764232978	0.0369379170474669
chr1:35358925|35361789.2	-1.4657458166806	0.0374017466952839
chr1:39853970|39857417.2	-2.06148687982931	0.0228764426051686
chr1:40189055|40202614.2	4.97229201482913	0.0193181321507374
chr1:41070595|41075451.2	-1.58002795550126	0.0242788659144765
chr1:51402435|51408332.2	2.18832438370911	0.0425254075833638
chr1:52477708|52481923.2	-1.94220768976759	0.0276128394558617
chr1:52877682|52892975	-2.92469831248096	0.0238239016296762
chr1:58506060|58534331.2	-1.77313956094714	0.0422036117984151
chr1:805799|810170.2	-1.79775831850619	0.00753641405216308
chr10:100260218|100262063.2	-1.78275209715169	0.0372747078910547
chr10:101939863|101957732.2	-2.06951404513955	0.0129831363022291
chr10:104008177|104018908.2	-2.01346913858571	0.0126204203029638
chr10:11997672|12014184.2	-1.71040900776867	0.0204979779638328
chr10:130166507|130171636.2	-2.31025551167507	0.021750495375593
chr10:131308211|131309299.2	4.72213556583867	0.0292652973295711
chr10:15816835|15847943.2	-1.48345677596795	0.0412579790579755
chr10:15833630|15847943.2	-1.52843421903873	0.0354689788973497
chr10:26500819|26503274.2	-1.91704552655556	0.0374139367024284
chr10:27142387|27145590.2	-1.97516406030404	0.00676978623707344
chr10:4830675|4909606.2	-2.88400392823606	0.00823749514979665
chr10:48401612|48410168.2	-2.02567985727289	0.00767499930950504
chr10:72708283|72715902.2	-1.67300558023237	0.0373620196753984
chr10:7276892|7285954.2	-2.42406852592161	0.000384245992871021
chr10:84417771|84425893.2	-1.52880939292081	0.02583388419549
chr10:84438512|84477664.2	-1.98584943155183	0.00676912837549214
chr10:863743|885760.2	-2.86237362305069	0.0123976040203001
chr10:93381219|93389154.2	5.42906528815235	0.00799595224478813
chr10:97436417|97437750.2	-1.43125226439103	0.0413827331770482
chr11:108046270|108054955.2	4.47529146613019	0.0429630606692617
chr11:108176246|108177090.2	-2.09677228871262	0.00211483018635827
chr11:108227595|108229323.2	-2.27189124607464	0.000838857154114578
chr11:108267171|108267342.2	-2.7812565798679	2.8348526042949e-05
chr11:108327645|108332037.2	-2.53125866473444	0.0064728259031754
chr11:108329021|108332037.2	-1.82203926847788	0.0364415753184092
chr11:34957384|34978182.2	-2.36170733825368	0.00483074643607475
chr11:66639700|66640123.2	-2.25734979260941	0.00101975172505553
chr11:68567014|68576043.2	-1.62302110289973	0.0407512408605314
chr11:73707420|73718718.2	-1.58554872388154	0.0258270336534705
chr11:77619606|77625818.2	-1.59861700756156	0.025567074948282
chr11:77683710|77693611.2	-1.87630036363919	0.00664735227976948
chr11:83111113|83117197.2	-2.89105733006976	0.00389408265914528
chr11:86022367|86031611.2	-1.57724929490306	0.0307243401354928
chr11:90361559|90369252.1	4.99045531278022	0.0186398156560469
chr12:112502144|112506422.2	4.90877207353915	0.0214265125000996
chr12:116230433|116237705.2	-1.67029469763854	0.0350078926916626
chr12:116230533|116237705.2	-1.55755801876043	0.0234769414085203
chr12:120782655|120784593.2	-2.11534275003425	0.00226203700144053
chr12:121780872|121781192.2	-1.49007497835401	0.0396033822545139
chr12:122340753|122341697.2	-1.56409713800047	0.0403467111143917
chr12:12244262|12244655.2	-2.87317984566601	0.0174344508819389
chr12:122511109|122515227.2	-1.73541130734909	0.0418127869200375
chr12:12635777|12635974.2	-1.87045417277927	0.0448386506349968
chr12:128808788|128815070.2	-2.33911288568083	0.0364603235997481
chr12:132508153|132508350.1	-5.51898217612709	2.29623577332085e-07
chr12:2681654|2682612.2	-3.08576586305138	0.00153492116215911
chr12:28225795|28226199.2	-2.29580394878011	0.039949498909994
chr12:32607957|32611283.2	4.77200226676396	0.0269455711245998
chr12:42210355|42212484.2	-2.19316638649962	0.0237245263817711
chr12:42374863|42398994.2	-2.32178051386267	0.0288531366202108
chr12:42384940|42398994.2	-2.11722203402021	0.0226613501036111
chr12:46239679|46243314.2	-1.43654139412108	0.0384786868848537
chr12:46239679|46254936.2	-1.69276558682797	0.0255679386355273
chr12:50427762|50430570.2	-1.92582546332591	0.0444850033401635
chr12:56568975|56571855	-4.04466413019383	0.00174295818720995
chr12:56670275|56673065.2	5.25702407710102	0.0112356612745832
chr12:57395749|57398198.2	-1.88944048610153	0.0221336610113882
chr12:64648537|64649552.2	-3.08212793071379	0.000122317467952178
chr12:64864668|64866903.2	5.69875514792173	0.00442112451321111
chr12:94169153|94186473.2	-2.03408657309754	0.0128850706154019
chr13:102622877|102627924.2	-2.08913799502284	0.0122950926939913
chr13:27427092|27430621.2	-2.35360209103682	0.0103801436778991
chr13:28256292|28261458.2	-1.82835112635021	0.0264682496836171
chr13:32732101|32735330.2	-2.18890112545728	0.00869207396413287
chr13:42953948|42970670.2	1.74449676389192	0.0477443534594191
chr13:45516143|45525051.2	-2.92622987298184	0.00188436031946198
chr13:49451553|49451909.2	-2.06853726295496	0.00357983889925749
chr13:50927407|50949505.2	-1.72893385529738	0.0121346239834156
chr13:77719532|77753358.2	-1.90504947847352	0.0117801381153451
chr13:95832927|95837202.1	-3.27763924687264	0.0076412665863568
chr13:99071510|99072508.2	-2.73333897596847	0.0236840815130851
chr13:99238427|99244624.2	-3.03571939955753	1.30913324813425e-05
chr14:102040236|102040673.2	-1.48814896087885	0.0317727716885747
chr14:102193463|102195120.2	-2.33641620025998	0.00371209802835764
chr14:22909483|22911403.2	-1.54274837171706	0.0233989714657302
chr14:30670256|30675065.2	-1.79164286120015	0.0204961817763264
chr14:30877572|30880734.1	5.82626549228867	0.00331830100643255
chr14:34862044|34862322.2	-1.47325356113358	0.0379827343235846
chr14:35126735|35127611.2	-2.62898172271261	0.00297664007707392
chr14:39276934|39279537.2	-1.8353931993773	0.00914547054022223
chr14:45118028|45130790.2	-1.67475013949168	0.0149084692146576
chr14:50148285|50150230.1	-3.70514630764839	0.0053591528058778
chr14:50150008|50150230.2	-1.65511987101265	0.0286828678278905
chr14:61721509|61721823.2	-2.28431385264984	0.00496448955459815
chr14:65561337|65629606.2	5.18455743560419	0.0129938052484252
chr14:65615978|65629606.2	2.99594623842792	0.0241035773741196
chr14:67685015|67690421.2	4.38749761505676	0.0486750088572964
chr14:71413948|71418196.2	-2.84902615775658	5.63157539353881e-05
chr14:71413948|71529370.2	-2.30988516474831	0.00454431366850073
chr14:73736998|73737297.1	-3.55408038052033	0.0120706260077396
chr14:75109685|75110371.2	-1.78048174224266	0.013120586150064
chr14:76166663|76180849.2	-2.07438493027844	0.0222227994714186
chr14:80743075|80761613.2	6.4420712564569	0.000779099561510997
chr14:80743075|80778046.2	2.10136467967688	0.0401981359297874
chr14:86028369|86041833.2	-2.331093818031	0.00636744248904847
chr14:89161701|89162969.2	-2.67577655250347	0.00129339552161664
chr14:89411934|89412490.2	-2.19463810132287	0.0156704222928429
chr14:91338005|91343657.2	-2.09269664163755	0.0300983688453942
chr14:91342380|91343657.2	-2.75036895449231	0.000442541949078467
chr14:99257471|99257836.2	-2.67757948087501	4.21828048307902e-05
chr14:99257471|99257839.2	-2.69624509614348	3.1373456977975e-05
chr14:99458279|99465813.2	-1.75911367900237	0.00887000009857516
chr15:100132007|100133315	-3.0113624306948	0.0222785679861788
chr15:100281229|100331054	-2.92469831248096	0.0238239016296762
chr15:100330889|100334180.2	-3.57460032454147	2.17097903383206e-05
chr15:100564692|100565265.2	-1.40332198885367	0.0428279585284847
chr15:101235082|101235577.2	-1.64941646961494	0.0406356781641938
chr15:22278818|22282869.2	5.19369026095486	0.0127124927591673
chr15:25405461|25411971.2	-1.40961568782345	0.0396653465353694
chr15:30474356|30484686.2	-3.74079399328234	0.000230752652117419
chr15:41085369|41087682.2	-2.0229692551377	0.0351452741494972
chr15:42827928|42840433.2	-1.87205004185664	0.0263333748106237
chr15:44331988|44338317.2	-1.71070777584639	0.0186710634770541
chr15:50569887|50575789	-3.08863175500633	0.0322375900582604
chr15:55348332|55348725.2	-2.5429756880455	0.0334057618017092
chr15:58912563|58916999.2	-1.80421911948698	0.00766553156167207
chr15:59030804|59031702.2	-1.80723593023597	0.0433719947294556
chr15:62007308|62013992.2	-1.95360966946706	0.00464847370923674
chr15:63532647|63537156.2	-2.70662451090848	0.000208143011213579
chr15:64118117|64118854.2	-2.05369437851973	0.0282095857996893
chr15:64499293|64500166.2	-1.4681558800043	0.0316627363296174
chr15:68141946|68146700.2	-2.67004892692444	0.000825614923987315
chr15:76287846|76292700.2	4.81969508082758	0.0251218954952727
chr15:84687625|84691644.2	-1.64091229997898	0.0432947557672892
chr15:89871475|89889140.2	4.49696290870135	0.0416427469548246
chr15:90439332|90443478.2	-1.42981961294012	0.046010376429921
chr15:90486954|90487582.1	-2.31144351529674	0.0394502259597097
chr15:98707562|98708107.1	-2.09180057680453	0.0457233408487262
chr16:11721577|11736233.2	4.44529285119106	0.0447274585747156
chr16:1314020|1320517.2	-2.85295395812764	0.000297343971436906
chr16:17258988|17259498.2	-2.23909225004775	0.00577221133732986
chr16:22349279|22349849.2	-1.64004613993748	0.0352448423649527
chr16:27211146|27215008.2	-2.79835886038132	0.0139305461409321
chr16:27213585|27215008.2	-2.21186261193502	0.00456088813087424
chr16:30728966|30729572.2	-2.11942586928533	0.00356406084014222
chr16:31090775|31091342.2	-2.06923831030566	0.00341778533037781
chr16:346148|347106.2	-2.42944359835851	0.000824674174261651
chr16:47497399|47515601.2	2.41300771435118	0.0377173100574457
chr16:50786855|50793664.2	-1.82696247883145	0.0471351292263905
chr16:53439016|53447106.2	-2.53446009976484	0.00492489889076328
chr16:58559804|58560362.2	-1.75306209544907	0.0115086789873655
chr16:85633914|85634132.2	-1.51591020091903	0.0305702635621906
chr16:88485939|88489153.2	-3.5199342114168	0.00105056157250967
chr16:8858350|8859335.2	4.74458017464824	0.028222967641951
chr16:8920359|8930397.2	-3.12538852389089	5.0584861713104e-05
chr16:89418284|89431326.2	-1.89143555352917	0.0469345262859179
chr17:18865469|18865952.2	-1.67394612517173	0.0453155690119374
chr17:20204333|20205912.2	-2.21228458918694	0.00190351871338487
chr17:29285710|29287716.2	-2.69507334315487	0.0258043902722213
chr17:29684563|29703062.2	-1.62424087823582	0.0287444884931504
chr17:31940286|31973231.2	4.67483322070867	0.0316395558963462
chr17:4066447|4072756.2	-1.92259061524973	0.0331853224340332
chr17:4242256|4242448.2	-2.73000828795786	0.0228083256634035
chr17:47326226|47345098.2	-2.72960131187415	0.0165135045905127
chr17:49311312|49312042.2	-1.8719184464269	0.00596623271975175
chr17:49719760|49720436.2	-2.50819611244948	0.01960359714258
chr17:55401469|55403868.2	-3.08884660445526	0.00156402274123806
chr17:59731421|59738947.2	-1.64905899134311	0.0213014771491694
chr17:59764971|59773885.2	-2.16466149088425	0.0109041309617482
chr17:61984171|61985090.2	-1.73994635690654	0.0240459852057432
chr17:65549520|65558736.2	-2.6398506440385	0.0141357558299111
chr17:67945409|67975958.2	-1.76112744597861	0.0113187614067088
chr17:75242336|75243570.2	-1.98214411032455	0.00745005488021218
chr17:78400735|78401057.2	-2.58174104171141	0.00510792630769952
chr17:82905936|82911789.2	-3.37625828399048	0.000457236492412675
chr17:83048471|83048785.2	-2.41073373985902	0.0244775379798075
chr17:83084938|83085323.2	-3.84504459994435	3.04924083482619e-09
chr18:196637|204692.1	-2.57308938897395	0.00533109151007754
chr18:24143091|24143413.2	6.57846443508252	0.000544024542380254
chr18:50918110|50932360.2	4.5151897697096	0.0404211602626289
chr18:54271360|54274090.2	-1.69934038242365	0.0394850672523118
chr18:58578814|58580548.2	6.12955674081455	0.00164444957124865
chr18:58659863|58660570.2	3.07605957612016	0.0201976632424751
chr18:79410403|79411501.2	-2.52586531112629	0.00151537587838196
chr18:79695225|79704917.2	-3.42151325557653	5.01053259520202e-07
chr18:8076455|8088851.2	4.63599434621391	0.0336190375154728
chr18:9182382|9195698.2	-1.93692780490897	0.0245559405781115
chr18:9583117|9595102.2	-2.13131274069477	0.00434481518483829
chr18:9583117|9595153.2	-1.80424054616802	0.026931999105719
chr19:1271329|1272051.2	-2.97146824064984	0.0239410098935985
chr19:1417500|1422396.2	-2.21867238507516	0.0470318600326664
chr19:17101660|17102557.2	-1.52644164688467	0.0476154068535899
chr19:18175040|18175697.2	-3.3230323961236	8.51252004773485e-05
chr19:19296989|19297344.2	-2.3702141875632	0.0191036635012973
chr19:1969508|1969959.2	-2.96010634633647	0.0149182287330987
chr19:20645684|20646405.2	-3.41922123057741	3.63519695950133e-06
chr19:21405129|21405856.2	-2.3884750024058	0.00104709472825233
chr19:2189732|2194577.2	-3.55270967529589	0.000243219393361459
chr19:22072809|22073564.2	-2.35788212238957	0.0017715431273142
chr19:29971193|29986417.2	-1.89985641571342	0.00861224507687712
chr19:29985223|29986417.2	-1.68775053249104	0.0130592901788445
chr19:34221507|34221738.2	-2.91898922933793	0.0107063728603207
chr19:3660966|3662001.2	4.65658119546142	0.032567041429317
chr19:37199400|37207254.2	4.59687749278304	0.035691692308451
chr19:39453356|39453521.2	-2.91563324774273	0.00091143182800264
chr19:40583398|40583717.2	-1.46666445903718	0.0355442708657698
chr19:47362476|47362693.2	-1.90471427020401	0.0217209769389928
chr19:48633444|48633655.2	-1.55900073380706	0.0466548852314782
chr19:5039836|5047669.2	-2.16323393145292	0.0398511749453049
chr19:55098784|55103568.2	-2.7491838334312	0.000853998865332664
chr19:57455653|57456182.2	-2.2348215375889	0.0145886569173032
chr2:112299849|112300029.2	-1.9470732315248	0.00462962065506907
chr2:128164730|128171284.2	4.59348894813487	0.0360279236846035
chr2:147972739|147975975.2	-1.94487883142884	0.00552705056297876
chr2:190655977|190673152.2	3.56255645970002	0.00637412268285107
chr2:190659158|190673152.2	1.79848127886998	0.0430811757931701
chr2:190900564|190931637.2	-2.19153923342856	0.0491121743524255
chr2:199368605|199433514.2	5.79256583982537	0.00363373890607282
chr2:201129729|201149835.2	-2.2838165391597	0.0418969116022944
chr2:201145378|201149835.2	-1.92754668894577	0.00423987446729268
chr2:202297379|202297906.2	-1.54202082563758	0.0473034991165235
chr2:202755538|202759353.2	-2.15623545125284	0.0314464933701246
chr2:207724800|207742342.2	5.4660098222434	0.00744744879768011
chr2:208285726|208288818.2	-2.21228272213838	0.0157949767834175
chr2:213310059|213364145.2	4.50062126700797	0.0413947657969517
chr2:230357805|230361697.2	2.14637603630847	0.0196103579517978
chr2:233388257|233390483.2	-2.60390811360468	0.000589564444529825
chr2:24135119|24147086.2	-1.6604172971388	0.027842660449627
chr2:26364302|26373629.2	-2.72247233563378	0.000511396800167891
chr2:30525587|30533314.2	-1.6255313858245	0.0487546355918135
chr2:31917926|31943383.2	4.75907083904168	0.0277184505438462
chr2:32377588|32395593.2	4.41304469863154	0.0468697490709499
chr2:37316237|37317179.2	-3.76394455873726	2.57784855266406e-07
chr2:38585644|38591648.2	4.58531059171503	0.0365093613422536
chr2:44209210|44218537.2	-1.92926463749508	0.0152065938581181
chr2:48451008|48460153	-3.09590201465798	0.0209176013304472
chr2:53887259|53893799.2	-2.49693036004163	0.0369759092125588
chr2:58198594|58232112.2	-2.44561205242275	0.00667351377927926
chr2:63433745|63439871.2	-2.80088578544846	0.00687426802966962
chr2:68490190|68513680.2	-2.4462933670156	0.00541825504201695
chr2:71396141|71418639.2	-1.62637272511416	0.0205408425915055
chr2:72718103|72733118.2	-2.23185021771114	0.00124675999892811
chr2:72731007|72733118.2	-2.2636081406949	0.00198384761182306
chr2:74046278|74048411.2	-2.57636684455429	0.0482786734965897
chr2:84870225|84870785.2	-3.53860648447961	1.21265513361249e-05
chr2:85861181|85863485.2	-2.52583455363414	0.00244026137865466
chr2:99186177|99195756.2	5.20652340163106	0.0124182271143334
chr2:99837477|100008932	-2.92469831248096	0.0238239016296762
chr20:17955365|17957037.2	4.90820032042588	0.0214351080098627
chr20:21339044|21344208.2	-1.79218492080887	0.0363696349734672
chr20:21590945|21591247.2	4.66084988632188	0.0323523781164161
chr20:32474601|32527913	-3.48222797723582	0.013325457771685
chr20:33619517|33623296.2	-1.7475133574174	0.015811014758538
chr20:41512846|41533570.2	-2.36455358217369	0.0470198076873099
chr20:51516784|51523596.2	-2.36730236643703	0.0126348797114529
chr20:53985287|53996050.2	4.64186807011024	0.0332873126942546
chr20:54028392|54028972.2	4.98226683172358	0.0188918352438372
chr20:54157169|54171670.2	5.72145909006029	0.00421583997485101
chr20:56381433|56384324.1	4.96352199603112	0.0194995621310984
chr20:63775678|63790790.1	-3.25226867410977	0.0136050745711344
chr21:15762891|15766141.2	-1.83688641520848	0.0063909742547892
chr21:29326059|29329693.2	-3.17226692016306	0.00164411735178132
chr21:34521499|34523710	-3.024986372694	0.0220498536327096
chr21:37420299|37421866.2	-1.86664753698248	0.00782786523402056
chr21:44855210|44861271.2	-2.26961039269926	0.00191479822147073
chr21:46643535|46644488.2	-2.204773282415	0.0191447365900065
chr22:28296198|28297852	-3.09590201465798	0.0209176013304472
chr22:32478981|32479275.2	-2.13844303276755	0.00206553852330371
chr22:41338313|41339191.2	-2.33839264811378	0.0175665323321232
chr22:43039780|43046573.2	-1.71315691517052	0.0497877635775197
chr22:45330603|45332710.2	-2.91217531223397	0.00756913135756226
chr22:45689712|45718493.2	4.69081180103996	0.0308544064960163
chr22:46974290|46997709.2	-2.09763241983359	0.0357782349880832
chr22:49794034|49804360.2	-3.34146893663788	0.00254888582329771
chr22:49797805|49799119.2	-4.23935262614866	4.99959789174412e-08
chr22:49797805|49804360.2	-3.35346252668224	0.000113743932993625
chr22:49797805|49824331	-2.92469831248096	0.0238239016296762
chr22:49804204|49824331.2	-2.87175500632484	0.0117516717738385
chr3:119503532|119513719.1	-2.04682040007404	0.0415323097426176
chr3:119503532|119517315.2	-2.1827995318942	0.00788497608539608
chr3:123931102|123949132.2	4.59852794776634	0.0357093523136691
chr3:138570318|138571356.2	8.37165620657772	2.80056442996537e-06
chr3:138570318|138572932.2	2.94731350314683	0.00489429701215476
chr3:138570318|138572984.2	6.06946680125814	0.00184956396327053
chr3:141553857|141559995.2	-1.47824564746629	0.049506459528305
chr3:142093061|142101841.2	-2.12846601216549	0.023206376917783
chr3:143795001|143832221.2	4.77575054210342	0.026965363962743
chr3:149846011|149872154.2	-1.92178997320607	0.0116902731065021
chr3:149846011|149921227.2	-1.37727993577512	0.049021245980011
chr3:149895473|149921227.2	-2.22495553764176	0.00672825627651475
chr3:152414941|152432920.2	-2.16777439669701	0.00359051400509143
chr3:152445282|152447773.2	-2.34918100176434	0.027921197882789
chr3:15411245|15415942.2	-2.2133911445225	0.0131524478735886
chr3:16301626|16302748.2	-1.95711145851026	0.0261843150043355
chr3:172247533|172251541.2	-2.28654209351525	0.00207281338540085
chr3:179203544|179204588.2	-2.12384681350863	0.00764674225836591
chr3:179764002|179765848.2	4.87440940473688	0.0227765033587909
chr3:183205876|183207823.2	5.84232749322936	0.00319111433818789
chr3:183833492|183833825.2	-2.33813324067606	0.0496321078299402
chr3:195381009|195392147.2	-1.61189493385835	0.0242735168201808
chr3:195878253|195888606.2	-2.31423605358357	0.0135652505553008
chr3:43299754|43303792.2	-2.71046739208296	0.000108233162365933
chr3:51541498|51552063.2	-2.56478964573028	0.000148467641176112
chr3:52412811|52414587.2	-2.1672219884894	0.00402760002986444
chr3:52737586|52741499.2	-1.84545312470218	0.0219462626011111
chr3:56592970|56594028.2	-1.43521955524142	0.0381891605147017
chr3:67495798|67508903.2	6.79941983675812	0.000280715816497656
chr3:71041328|71053773.2	-2.8710807239996	4.79821048755311e-05
chr4:102580535|102582957.2	-1.83553200520345	0.0166240852574037
chr4:102714438|102726683.2	-1.54172294106628	0.0402561832043587
chr4:104518577|104519454.2	3.15339058392805	0.00867090155913828
chr4:105424196|105456745.2	-2.18935711055262	0.0160367392873263
chr4:107682015|107701285.2	-2.38151854841272	0.0339689491385143
chr4:139116649|139139497.2	-2.75391716661683	0.00621505088419911
chr4:142402938|142462726.2	4.78549419094364	0.0264733269469796
chr4:143543509|143543972.2	-1.69935377282404	0.0120190517468343
chr4:152411303|152469988.2	-1.83622012713978	0.0273150324413308
chr4:166039339|166078030.2	5.26380466782706	0.0110588488406319
chr4:166055076|166078030.2	4.5067752581368	0.0407227087723022
chr4:22401431|22402799.2	7.46926144594666	4.08513120304012e-05
chr4:2490337|2497121.1	-2.57420356140369	0.0169091982190387
chr4:2949934|2951245.2	-2.08902803354063	0.0477763775826502
chr4:39837856|39842056.2	-2.64612452743965	0.0101193945453849
chr4:42551198|42556040.2	4.62249940688052	0.0343609327106901
chr4:42616033|42627109.2	5.25433938963534	0.0113002263563016
chr4:51863437|51877854.2	-2.46273969007513	0.00107065093003771
chr4:51863437|51891851.2	-1.87873548422872	0.0121770267434887
chr4:5663107|5665649.2	5.41641699994316	0.0081838140628877
chr4:6923373|6924111.2	-1.78048803473476	0.0180555987555466
chr4:73085249|73092300.2	-2.05067620279002	0.0079708747500343
chr4:86764593|86767976.1	-3.11626217349907	0.00224340048850513
chr4:87046166|87047594.2	-1.66909367626984	0.0248815383582016
chr5:103096541|103097781.2	-1.61865537842987	0.0262422675064947
chr5:10415488|10417404.2	-1.70684262171083	0.0310040626873912
[truncated: 968 more rows]

## Sheet: DCE_ATLdiag_Lymphoma_vs_Don_sig
	logFC	PValue
chr1:100424222|100442996	-4.68775177515008	2.06683752838087e-06
chr1:100439932|100468094	-3.72982008591927	0.0129052106674116
chr1:100494818|100499262	-3.60157253551446	0.00800384050787179
chr1:100906852|100921841	-2.70182567517567	0.0297706728315593
chr1:103565435|103575540	-2.32315499460594	0.0203603140637273
chr1:108148279|108161293	-3.70104431751272	0.000312269416946192
chr1:108752257|108760085	-3.67904681527683	0.00866287277609001
chr1:11073934|11074326	-4.43089537877467	0.00971258743371333
chr1:110891392|110892533	-4.78504630243889	8.4957485641305e-07
chr1:111147642|111161296	-3.27299443177762	0.00127344687789278
chr1:112610841|112616895	-3.06014576566236	0.0459259634678029
chr1:112653598|112659779	-2.51682453248132	0.00322969932976109
chr1:112653598|112667145	-3.68138262880067	0.00377075831761952
chr1:113829592|113834439	-2.96406601552555	0.000474878571546546
chr1:113833111|113855049	-5.64891085117469	0.000262548017497317
chr1:113834910|113855049	-2.93287555749238	0.00314011477556724
chr1:113848540|113855049	-4.33013260446943	8.61493198247893e-06
chr1:114463104|114464388	-1.92749882803123	0.0288537964579992
chr1:117402186|117405645	-3.7231437636025	1.11534262915141e-05
chr1:117402186|117414831	-2.68148484760095	0.000970283850720203
chr1:117402186|117420649	-2.44561946477621	0.00161718608720462
chr1:117402186|117442325	-2.44243151575193	0.00224380698787567
chr1:1223244|1223968	-2.91424013891186	0.000239365096105503
chr1:13715541|13749487	-3.81760870620653	0.0110123396735291
chr1:13731000|13742157	-3.16037578350685	0.00159198670770125
chr1:145839890|145841071	-3.37409919791032	0.0147005425555458
chr1:145839890|145842477	-3.12357843930537	0.00153092573242948
chr1:150230571|150231926	-3.21433244129448	0.00331574378943812
chr1:150334935|150335241	-3.82105918116736	0.0109141854544177
chr1:150440923|150446401	-3.41303992453194	0.00416262667788834
chr1:151024611|151025673	-3.70167153074505	0.000356162537903136
chr1:151024611|151027327	-4.19508930547278	0.00266653712457598
chr1:151027233|151028944	-3.22442311882362	0.0130380933775009
chr1:151088190|151118139	-3.22067205075744	0.036513715986827
chr1:151117392|151118139	-3.21713776063505	0.0223424130437754
chr1:151166934|151167414	-4.57411880562199	5.67702430405514e-07
chr1:151638888|151639119	-2.41537619578217	0.00817328854389377
chr1:154172908|154173201	-3.40271766966694	0.000164751326359744
chr1:154234591|154235291	-3.19779295743929	0.00488258497406549
chr1:154251041|154251653	-2.64684331368298	0.0262100709435599
chr1:15534237|15536814	-3.00894226991472	0.00861726060012224
chr1:155370504|155370983	-2.60393908621985	0.046743126124261
chr1:155438327|155459898	-1.98649298022987	0.0158221558513784
chr1:155521100|155521618	-2.78945621606769	0.00230661539752583
chr1:155675010|155679512	-2.95976679205471	0.00068824389570319
chr1:155675010|155680456	-3.63255072131401	0.00622424020352477
chr1:155676548|155679512	-3.42275187653615	5.73089589112441e-05
chr1:155725382|155726019	-3.25047517299313	0.000148773441341697
chr1:155853276|155853806	-3.10859994593261	0.000115143283460332
chr1:156333547|156334918	-3.3961443834748	0.000453765330843208
chr1:15638307|15643650	-3.39435154355547	0.000842199121909911
chr1:15717893|15721388	-2.16171587716187	0.0382802840256184
chr1:161102048|161102375	-5.22339301479923	0.00187133110046267
chr1:161846449|161863312	-3.01377476189227	0.0473862314889573
chr1:167966629|167975015	-2.39234684718893	0.0396304587440344
chr1:169477155|169477757	-3.00324623928053	0.0274697658493618
chr1:169978085|170031975	-3.05174847808286	0.00114727513875329
chr1:171568247|171575128	-3.44335580457368	0.000327991787141322
chr1:172131175|172182896	-3.45928345500293	0.0487222144053098
chr1:172551512|172557794	-3.42492250382346	0.00428790254613842
chr1:172555869|172557794	-5.07997748397704	0.000227726926876748
chr1:173992755|173993135	-1.99591315906749	0.0484226025977815
chr1:174272414|174394145	4.89679501676749	0.0492221987083494
chr1:175986943|175989479	-4.6443127809913	0.000607264574458586
chr1:176027572|176046324	-3.08679692166347	0.0321722369103306
chr1:176116624|176136547	-2.66110776367825	0.032105938467618
chr1:179131311|179133374	-2.7882613751341	0.0193895189212133
chr1:179342114|179343635	-3.36397967957323	0.0214913812940031
chr1:179347600|179350431	-3.56389684752964	0.00747859354880166
chr1:180003174|180006567	-1.78167101941793	0.0453611152536455
chr1:180397516|180413471	-2.80056415314977	0.0194026274252525
chr1:185214507|185231708	-2.82663602228173	0.0176372057006003
chr1:186318447|186318828	-4.05622807098312	0.00209366007849634
chr1:197583152|197611976	-4.60868990648825	0.00210855222439634
chr1:197642711|197658369	-4.02891705334819	3.35788587535964e-05
chr1:198232553|198264235	-3.84891581884171	0.0103760949443481
chr1:205616478|205623891	-1.88002332967065	0.0147408158816205
chr1:205771472|205773224	-4.85831067303968	0.0039005552919062
chr1:20757166|20773610	-2.65870867340336	0.001242301660785
chr1:20765377|20773610	-2.38943305187589	0.0493932608786202
chr1:20770930|20773610	-4.31667265928278	1.33960273614226e-06
chr1:207815929|207817414	-2.84871966882957	0.0337338199412897
chr1:20969474|20981227	-2.58292002020268	0.0228299013696867
chr1:211353239|211354467	-2.09442495549992	0.0105582288163891
chr1:211778918|211793190	-2.39657495298062	0.00641934643403004
chr1:212863725|212885396	-2.95445557131897	0.0276154778935215
chr1:213117317|213129889	-2.95286647243991	0.0150423444475641
chr1:21715389|21721764	-2.67083281694185	0.00724694555624336
chr1:21715389|21724095	-3.955083887126	0.0195501519446794
chr1:21721036|21721764	-4.88906573016958	0.000383952694623951
chr1:22078429|22086866	-3.26518049381774	0.00421424581103405
chr1:22078429|22091501	-3.28595748825136	0.00547806426618791
chr1:224952670|225007544	5.26665436554943	0.0286756582058065
chr1:2302978|2304585	-5.77259214877275	2.35205238848795e-09
chr1:23030469|23044486	-4.77761182675309	0.00432083280568318
chr1:23030469|23050520	-3.21283909573726	0.000185596182001166
chr1:23030469|23059167	-2.34982915327203	0.0472227569773035
chr1:23071225|23072197	-3.0721416659961	0.0112737150984669
chr1:230954333|230961303	-3.15426031455911	0.000245090488944417
chr1:231537213|231542611	-2.40634397334672	0.00648130492496465
chr1:231795242|231818517	-3.50352502986576	0.000145607521869637
chr1:231818329|231819150	-3.93382740317198	0.0105118892413658
chr1:233090061|233095863	-2.48498408008277	0.0127152624496766
chr1:233198939|233218184	-3.41279434417562	0.0135123842700305
chr1:233217899|233227371	-2.99354290927177	0.00118404757582685
chr1:235335242|235342883	-3.72462095730098	0.00817551010544657
chr1:235341708|235342883	-5.83901412660847	0.000114910988235207
chr1:235780865|235782087	-4.75621503343156	0.000329734943867919
chr1:235793503|235801097	-3.92633925090586	0.0203427053693056
chr1:236803428|236806233	-4.34037647157294	0.0106908873440219
chr1:236824119|236826896	-3.2767217528652	0.0249564841539487
chr1:23814190|23820593	-4.49670297142089	0.000222262033970833
chr1:243304713|243316893	-3.73075685133457	0.00810159364565641
chr1:243695591|243843282	-3.19534616566302	0.00479839135119845
chr1:244843135|244848856	-3.43851924962223	0.00882181237466113
chr1:24514314|24514567	-3.82739361718945	3.45094172669667e-06
chr1:24531218|24533254	-2.46339966406802	0.0432610944065491
chr1:246591512|246591941	-3.58606079774452	0.000201737738251096
chr1:246621429|246634587	-3.20702128593654	0.0270374002356823
chr1:246627356|246631924	-2.4981529110938	0.0408081125913001
chr1:246631359|246631924	-4.12073659183211	0.00745588466116367
chr1:247157000|247159813	-1.98240715918509	0.0493573336822943
chr1:247159006|247159813	-2.47681255411784	0.0103089983500781
chr1:25242374|25243633	-4.75932839234561	5.96117772260612e-05
chr1:26446316|26447660	-3.13532735429386	0.0004141323487496
chr1:26942660|26943065	-3.35234321911565	0.000109417909968463
chr1:28010947|28017239	-3.97356782184953	0.0190912822378065
chr1:28473554|28476291	-5.60715215617676	0.000295910707278207
chr1:28742403|28743986	5.08633572021083	0.0368336385181621
chr1:28987431|28987905	-3.33694902055652	0.00827554481662445
chr1:30992390|30995220	-2.86650226055665	0.000644101489564098
chr1:31005853|31007102	-2.78432139931237	0.0283159529289926
chr1:31337175|31339048	-3.04215212199018	0.00553927262726723
chr1:31915895|31919658	-1.88096801279762	0.0166928323983727
chr1:32030298|32033334	-3.39200781253072	0.0135700396928465
chr1:32224034|32224475	-4.23642771945398	0.0119591614536606
chr1:32279671|32280210	-3.37234529864636	6.30551869541916e-05
chr1:32631827|32634792	-2.70823971348231	0.00169871970354857
chr1:32948222|32949774	-3.79932484848821	3.34078962326669e-05
chr1:33294937|33295305	-2.9837635609654	0.000680853762687739
chr1:35358925|35361789	-2.68672766077122	0.000811089701220436
chr1:36361221|36362656	-2.57921132291225	0.00757833443170664
chr1:39439274|39439500	-3.11160211078254	0.0109845960765211
chr1:39853970|39857417	-4.24690917969247	0.000392887986296538
chr1:41070595|41075451	-2.80954127308717	0.000513902651256179
chr1:42265115|42278672	-3.25335508126793	0.000572746484302192
chr1:42265115|42323827	-3.20062582618285	0.0265369735513356
chr1:42278348|42311110	-3.41601441218183	0.0274879967649526
chr1:42773563|42775479	-2.80162517990412	0.0484724260981473
chr1:45640210|45642499	-2.57421337487574	0.00207810163998782
chr1:45659028|45661225	-4.28543084882806	0.00563466664487488
chr1:50490588|50535457	-4.90091406161063	0.0036864714649098
chr1:51461091|51465326	-2.09639188274198	0.0333598082509876
chr1:51827796|51834170	-3.18915416933934	0.000514461034093289
chr1:52477708|52481923	-2.94679415168564	0.0047020957819703
chr1:52493611|52509712	-2.71312070160787	0.00147344306074333
chr1:52509596|52526373	-2.48976678813222	0.0325028173679814
chr1:52515891|52526373	-3.13711281120089	0.000685654932273524
chr1:54040756|54043525	-3.46858362600258	0.0126450650315049
chr1:58506060|58534331	-3.42359768154087	0.0015705037982475
chr1:58506060|58536741	-2.26335999084689	0.0050097687483351
chr1:58527261|58536741	-2.86216835478911	0.0231018000845286
chr1:63478764|63490218	-4.23642771945398	0.0119591614536606
chr1:66891154|66905375	-2.94796213157548	0.000456980318770312
chr1:66958059|66963160	-2.78493233687088	0.000893080646416823
chr1:70292388|70315566	-2.00573312511783	0.018606392785203
chr1:75732644|75734871	-3.08124856484865	0.0446748002441105
chr1:77631850|77641655	-2.57939338337486	0.0250237651074956
chr1:77711747|77714783	-3.44862309333224	0.0263086287754682
chr1:77717867|77725762	-3.30894755857797	0.0317111900943542
chr1:7777160|7778169	-3.10431436489379	0.000107200651979721
chr1:77858938|77866391	-3.30519298880735	0.017135032816142
chr1:805799|810170	-4.45662549040319	7.34153903435717e-05
chr1:84179177|84185182	-4.33327008311101	0.0108006428651949
chr1:84179177|84197824	-2.5182251447763	0.0303290693569639
chr1:8541214|8557523	-3.83048661581151	0.0013109890694722
chr1:86715724|86719635	-2.85385884646746	0.0273274450877707
chr1:88740988|88741288	-5.85243963857822	0.000110480167678381
chr1:88740988|88786213	-3.44267518664696	0.0138859206337555
chr1:89686470|89714851	-3.82449872447303	0.010816972841196
chr1:90916640|90918154	-3.91276524635738	0.0041984219857619
chr1:90937485|90941309	-2.75345323592058	0.0307912089780614
chr1:91861471|91864279	-5.09349020782116	0.000314670190829729
chr1:92333391|92380873	-2.99591547879794	0.000256365221099076
chr1:97515726|97549744	-5.35155537046911	3.55346094307927e-06
chr1:9871187|9877989	-3.12106438746596	0.0409646238676879
chr1:9931891|9934860	-2.38353011136318	0.00271509085070945
chr1:9931891|9935627	-2.25798325094915	0.0314370446658179
chr1:99993537|99999415	-3.34616853218349	0.030172451828417
chr10:100260218|100262063	-3.42738263286179	0.000962772252542414
chr10:101667886|101676436	-1.53655808700962	0.0451972021979145
chr10:101792839|101810314	-4.47922550119527	4.60898295725906e-05
chr10:101889412|101957732	-4.34037647157294	0.0106908873440219
chr10:101939863|101957732	-3.45010277813999	0.0004789222037106
chr10:102023477|102025248	-3.06014576566236	0.0459259634678029
chr10:102654653|102656385	-5.87704711700916	0.000103919036241478
chr10:103438015|103438808	-2.24214116491477	0.00906172040664691
chr10:103900062|103910622	-4.23642771945398	0.0119591614536606
chr10:104008177|104018908	-4.14998474673665	3.71426485471734e-05
chr10:1072116|1080476	-3.4409024945206	0.0190363387571292
chr10:1072116|1096246	-3.45338339609825	0.0260763021286795
chr10:1080011|1080476	-3.35345380407682	0.0116457936089288
chr10:1084403|1096246	-4.24287896122414	0.00605402510083096
chr10:110124017|110130486	-5.93268156860265	1.21204313237236e-06
chr10:110124017|110132400	-6.20119502112738	2.06287416022088e-05
chr10:110596398|110598290	-2.37836503242449	0.00287577861113668
chr10:110951608|110985765	-3.59122313108576	0.0158682744487235
chr10:110964125|110985765	-2.8547311446872	0.000646907254296016
chr10:112527087|112538330	-3.0511108859038	0.045045028220044
chr10:114970368|114974385	-5.47714721933378	9.84222706156162e-07
chr10:11997672|12014184	-3.12909994999041	0.000287276410040376
chr10:12235048|12238485	-3.05910971113351	0.0264999599758891
chr10:124706636|124706887	-3.71659558939966	0.000744158309721968
chr10:124942457|124943307	-2.74471694199513	0.000586140026611724
chr10:130166507|130171636	-3.60430682483328	0.00460585985660862
chr10:15816835|15847943	-3.30322485719219	9.63140599081047e-05
chr10:15821656|15847943	-3.48501772228066	0.00401282906943261
chr10:15833630|15847943	-3.33986674904061	7.79965833249919e-05
chr10:16484337|16486617	-2.61978792369794	0.0462345504144077
chr10:17704431|17705741	-2.64073129821709	0.00277315482940188
chr10:21681332|21682257	-4.2659379624461	0.0115851992988141
chr10:21681332|21713950	-3.45928345500293	0.0487222144053098
chr10:22591629|22609717	-2.78770923927765	0.0255244644696032
chr10:26500819|26503274	-3.25614624259773	0.00408045344347742
chr10:26500819|26513660	-3.36478680290397	0.0055324433534618
chr10:26503197|26513660	-3.13958287825774	0.041315041791552
chr10:26511747|26513660	-4.08425653260683	0.00132716708427813
chr10:27142387|27145590	-4.09851113210442	4.8033939386019e-06
chr10:27532507|27533994	-4.33113228766554	0.00070289414011746
chr10:28147483|28150059	-4.13055324358962	0.00732714496140548
chr10:28583399|28596041	-3.31747049547089	0.00344093055280335
chr10:31908172|31910563	-4.3436246206608	2.19045933872109e-05
chr10:32019858|32021287	-3.06936809790893	0.0228463385124881
chr10:32034690|32037607	-5.29552534493808	0.00168481936565568
chr10:32451592|32474023	-2.42796503895888	0.0049807027535738
chr10:32543300|32584304	-2.01611523379389	0.00879766103064352
chr10:32543300|32623817	-2.84861554487864	0.00756910724035248
chr10:32565558|32584304	-3.15219504732187	8.74102012232922e-05
chr10:35516523|35530243	-2.81764484762666	0.0331443112104872
chr10:43154897|43158931	-2.31545045107199	0.0223449573033945
chr10:4830675|4909606	-3.07845249602117	0.0159813615221808
chr10:48401612|48410168	-4.15359385953362	1.30028760614639e-05
chr10:49915917|49935142	-2.17447623682144	0.0252905378404348
chr10:49932100|49935142	-4.34037647157294	0.0106908873440219
chr10:50433476|50466932	-3.33203884566649	0.0230454637793398
chr10:50433476|50590247	-3.97356782184953	0.0190912822378065
chr10:50460673|50466932	-3.38852982097463	0.0284718860352275
chr10:5709530|5714207	-3.49687359662754	0.00463566136604594
chr10:5794885|5800705	-2.56965114181407	0.00178083439633182
chr10:60084602|60085253	-6.36858195287328	8.40995609368171e-06
chr10:62388396|62459797	-4.23642771945398	0.0119591614536606
chr10:68363590|68364113	-3.3562856015229	0.0250675417801364
chr10:68393138|68394451	-3.31409380468213	0.00779209591612428
chr10:68644698|68647005	-5.31242560148576	0.00164642209695538
chr10:68737845|68742569	-3.51285273037742	0.00801073984325221
chr10:68959806|68960249	-2.92342136474359	0.00140573098718296
chr10:72708283|72715902	-3.79564944248388	0.000107089832944854
chr10:72715111|72715902	-3.77642058724191	0.00516476009637521
chr10:7276892|7285954	-2.86591805066738	0.000537673282818679
chr10:73474919|73479517	-4.14869451480848	0.00707661782643183
chr10:74070670|74074903	-3.45928345500293	0.0487222144053098
chr10:74394141|74398579	-2.73978932316418	0.00996729612170616
chr10:7797047|7802854	-2.89806603047444	0.000364558280530053
chr10:84371014|84373815	-3.62894382775221	4.10757302484749e-05
chr10:84417771|84425893	-4.46296346682533	2.18521190513608e-07
chr10:84438282|84477664	-4.44124106302745	0.00290772010009746
chr10:84438512|84477664	-3.47456613463839	6.72897130489924e-05
chr10:87767673|87776427	-4.30092669012347	0.000189375693987605
chr10:87894025|87895777	-4.36920788713366	0.00264014918255108
chr10:88893871|88905660	-3.99219579097058	0.00102980349669032
chr10:92008829|92009208	-3.30894755857797	0.0317111900943542
chr10:92143029|92181019	-4.34037647157294	0.0106908873440219
chr10:93670770|93687449	-3.45928345500293	0.0487222144053098
chr10:93676653|93687449	-3.75469749042976	0.00341061805422042
chr10:93684056|93687449	-6.09294111391458	3.87361067120377e-05
chr10:97436417|97437750	-3.26704997914816	6.50146566083739e-05
chr10:97437191|97438703	-3.32680142436095	0.0263900782465326
chr11:102362896|102368548	-3.26812480026874	0.00276254459154472
chr11:107390074|107392895	-3.37855612772605	0.000149205954865537
chr11:108176246|108177090	-4.07657350728651	1.67710897533606e-06
chr11:108227595|108229323	-4.39862129877154	3.91225525964773e-07
chr11:108227595|108235834	-2.14070730149007	0.0114938852589091
chr11:108227595|108247127	-4.13055324358962	0.00732714496140548
chr11:108235670|108245026	-4.7080594949558	2.69837844594115e-05
chr11:108258986|108267342	-3.82547377613608	0.000870561327472348
chr11:108267171|108267342	-4.14724533881356	9.26493714812821e-07
chr11:108299714|108304852	-2.5718877470823	0.0375043224695449
chr11:108327645|108332037	-2.62398733031943	0.0133211600253285
chr11:108329021|108332037	-3.20140035579046	0.00229910438011404
chr11:113852501|113854335	-3.45928345500293	0.0487222144053098
chr11:116863668|116873636	-3.45338339609825	0.0260763021286795
chr11:117279908|117280259	-3.81863121562435	0.00561280078602604
chr11:118210487|118214886	-3.3834777674652	0.0286860277867757
chr11:118581246|118584644	-2.91683800037957	0.0120652245323057
chr11:118583809|118584644	-2.99916516000511	0.0314404720156586
chr11:119273868|119274953	-5.0773899628985	2.40709395281143e-05
chr11:120406118|120409450	-4.28901141161959	0.00558131118740079
chr11:121045674|121060085	-2.42669178253025	0.00728325033374995
chr11:122776219|122777210	-4.89532866637088	0.000757099239660637
chr11:128480191|128490576	-3.91252765715796	0.0206532196734964
chr11:128484823|128490576	-2.57269455036859	0.0109457982965231
chr11:128758115|128768272	-4.93879028981814	0.00351236384946335
chr11:128768118|128772985	-7.00824713349053	1.03099141808234e-07
chr11:130260856|130261929	-1.50317345848386	0.0462944510386514
chr11:14771937|14789242	-3.93431766750765	3.80733255146927e-06
chr11:17878208|18010139	-3.29555884958941	0.0102958598686025
chr11:18291442|18292019	-2.56096485558177	0.0199102113425649
chr11:2768844|2778037	-3.70520109675422	0.00597682469779754
chr11:2969803|2979237	-2.68074036355636	0.0419810876687747
chr11:33105567|33106064	-2.40257453705832	0.0447816959887706
chr11:33286413|33287511	-2.09058819164544	0.00638930073373712
chr11:34071726|34076642	-2.21601848118129	0.0416915736739651
chr11:34086064|34092056	-2.91497679635614	0.0425860535196513
chr11:34089395|34092056	-4.08577500511357	0.00191314576000586
chr11:34090179|34092056	-4.36669529045038	0.000512294197020833
chr11:34957384|34978182	-3.61880525195047	0.000372675443164749
chr11:34957384|34984728	-3.79315141439242	0.0248228669505259
chr11:36393846|36419303	-3.45928345500293	0.0487222144053098
chr11:3731391|3731578	-3.68049298814635	0.00909385292970568
chr11:3731391|3735324	-3.17179711141795	0.0395690193730152
chr11:3768581|3768744	-4.163618376487	0.00218573677437631
chr11:3768581|3776021	-2.95286647243991	0.0150423444475641
chr11:3773632|3776021	-2.95748207560024	0.0159553222132635
chr11:46076754|46092223	-2.15343503839178	0.00619096572119538
chr11:46493608|46494204	-2.71769208126194	0.0443284180674236
chr11:47358844|47360040	-4.33327008311101	0.0108006428651949
chr11:47358844|47375729	-2.89926331651315	0.0211613292843355
chr11:57491224|57491862	-4.66990984820921	0.000121250282246628
chr11:581492|582081	-5.91598662944366	9.23401493871376e-05
chr11:59639048|59643035	-3.12106438746596	0.0409646238676879
chr11:61366045|61367998	-1.91051643737886	0.0213887698018803
chr11:61437625|61438113	-2.07077970815573	0.0169212061242776
chr11:62827155|62827631	-3.33345320657395	0.0195568812514308
chr11:66210362|66211259	-4.64797188329794	0.00190810210541199
chr11:66238804|66239277	-4.23220344300667	0.000992563611613674
chr11:66639700|66640123	-4.42279558130766	7.30808436205321e-07
chr11:68551121|68564432	-5.35345948327137	3.21029767173728e-05
chr11:68567014|68576043	-2.99279405523157	0.00103550259850111
chr11:68760225|68761687	-5.37607012129434	0.0015013477434178
chr11:73707420|73718718	-3.32222824355872	9.01921258359686e-05
chr11:73707420|73718890	-3.75187221980881	0.000287736148543739
chr11:73707420|73720899	-2.81047686284137	0.0138046266271545
chr11:74132844|74133557	-3.29614828988055	0.0122640629155247
chr11:74859158|74863021	-3.42671914602097	0.0194934941376739
chr11:77619606|77625818	-2.95251791757691	0.000321908976773499
chr11:77619606|77629899	-2.45681456135349	0.0163331760786488
chr11:77622500|77625818	-3.36376341774023	0.0218030092561408
chr11:77672042|77693611	-4.90091406161063	0.0036864714649098
chr11:77675036|77693611	-2.77512671553067	0.0366579761081747
chr11:77683710|77685159	-3.52262103607084	0.0369111157078397
chr11:77683710|77693611	-4.16232222470776	1.68325075080977e-06
chr11:77685105|77693611	-4.18014450452894	0.000697559779271445
chr11:77691159|77693611	-4.46277960914593	0.000259737419404556
chr11:77722688|77725699	-4.09470303650451	0.00127994750457079
chr11:83111113|83117197	-3.86597761069785	0.00219741241497526
chr11:83273647|83278829	-2.21670702925698	0.0288211653334752
chr11:85974708|85983973	-2.5928066297379	0.00490511929424992
chr11:85981745|85982003	-3.39941632981148	0.0204567816221727
chr11:85990250|86031611	-2.87283770294953	0.0427000400254859
chr11:85996826|86003451	-2.37656583856047	0.00383959377998954
chr11:85996826|86031611	-2.5524475687875	0.010357592347542
chr11:86007542|86031611	-2.67242025160676	0.00308361771150787
chr11:86022367|86031611	-3.47777439344334	6.08547740828498e-05
chr11:86306245|86306482	-2.92479370810403	0.0117998998479709
chr11:95812932|95813589	-3.29078411829055	0.00182787434530634
chr11:992503|994245	-3.35123138374921	0.0299500275024726
chr12:100204940|100207786	-3.30894755857797	0.0317111900943542
chr12:100282943|100298175	-2.39968333326059	0.00383487446369109
chr12:102039868|102046119	-2.46803643588234	0.0137964193834197
chr12:104120400|104123423	-3.79399957753605	0.0248337216300881
chr12:110388512|110396452	-3.42106334784047	0.0272804591062264
chr12:111509549|111510582	-2.1134231022477	0.0209609538624023
chr12:111552280|111555919	-2.01097178766623	0.0146287924262468
chr12:111679151|111683307	-3.57440417110292	0.00455205583159208
chr12:116230433|116237705	-3.28660798776532	0.000511545160039893
chr12:116230533|116237705	-3.00397430215924	0.00015684537163634
chr12:120557282|120557682	-4.56506071314247	2.63548534933039e-06
chr12:120782655|120784593	-3.85454986932995	5.9402256304788e-06
chr12:121780872|121781192	-3.91033131366977	1.03823484174368e-05
chr12:122288489|122316855	-3.55145683997376	0.0110700043091111
chr12:122340753|122341697	-3.11608552977806	0.000391966075293248
chr12:122511109|122515227	-2.77619092121467	0.00574023802099187
chr12:123345258|123350441	-3.02519239535559	0.0369314121468241
chr12:123586747|123590449	-2.57786274182404	0.00253203149297669
chr12:12519862|12521463	-2.5525266373158	0.0115006438183054
chr12:12635777|12635974	-3.0066016926028	0.00802350650924384
chr12:128814775|128815070	-3.69765175660075	0.00645613035724526
chr12:1289852|1290012	-4.31556454148908	0.00208890032682004
chr12:132508153|132508350	-3.55639755514734	0.00283354958689708
chr12:132714858|132718120	-3.7923612271012	0.0069341455183105
chr12:14446988|14457295	-4.398582725869	0.00166957665076304
chr12:19462510|19473355	-2.86150324017162	0.00144313379501066
chr12:26550247|26655852	-3.37858157305633	0.0289327468318642
chr12:2681654|2682612	-3.39217713403519	0.00437269536554427
chr12:26982773|26990627	-3.06014576566236	0.0459259634678029
chr12:26996742|26999676	-2.47192577920874	0.04395622621953
chr12:27030158|27032681	-4.22460263575356	0.00623784285089023
chr12:27030734|27032681	-5.59167901575306	0.000308996926616366
chr12:2820086|2821792	-4.53224081364639	3.34109257961684e-06
chr12:28225795|28226199	-2.87394952989325	0.0299423744560549
chr12:28225795|28259442	-2.92729710282026	0.000259811876724886
chr12:28225795|28391411	-2.98140184091648	0.0494007541918212
chr12:28255581|28259442	-2.46772095570075	0.00385664817849254
chr12:28255581|28307749	-2.18472113551171	0.00627720830660901
chr12:29293300|29297200	-4.29548240161521	0.0112186343578749
chr12:29338531|29341816	-2.58999582039244	0.0489264413074777
chr12:32708153|32718763	-3.50983250555856	0.0168597454456576
chr12:39579535|39586297	-2.94018677127112	0.0270873215788046
chr12:42210355|42210619	-4.13654959433843	0.000680309343424286
chr12:42210355|42210680	-2.12558401760235	0.0071630325386007
chr12:42210355|42212484	-3.10494682202706	0.00759581706046793
chr12:42384940|42398994	-3.90971322381058	0.000920231720267031
chr12:45945249|45964188	-5.34494772808916	0.00157218979493488
chr12:46229153|46243314	-1.78547096871858	0.0180245516913435
chr12:46229153|46254936	-2.57966105029143	0.00160990017612657
chr12:46239679|46243314	-3.07091101088988	0.000125475897747242
chr12:46239679|46254936	-2.86432129141628	0.000929056440042072
chr12:47104113|47108164	-5.57191514342818	2.13228988794354e-08
chr12:50094437|50096972	-3.06697014868531	0.00723811299896787
chr12:50427762|50430570	-2.67023674367113	0.0199405501327459
chr12:50427762|50441643	-2.24786275949492	0.0228014569634156
chr12:50780140|50809589	-3.94355024328602	0.00388972652499497
chr12:51055835|51056502	-5.63956988020421	1.82330294671288e-05
chr12:51073823|51074082	-2.79659497859401	0.0259462157094486
chr12:51116315|51117747	-4.2659379624461	0.0115851992988141
chr12:51240343|51241116	-4.32103087214966	0.00299470906260974
chr12:51299203|51299714	-4.18092984287462	0.00142855074191505
chr12:56666204|56670364	-4.03772054698676	0.000290429048179419
chr12:57395749|57398198	-3.0504753577473	0.00199977180617898
chr12:64648537|64649552	-4.17163190112486	4.10218688280896e-05
chr12:6510279|6510532	-3.90951077285052	0.000190467480972283
chr12:66145841|66153448	-5.16643840852947	0.00203026720511139
chr12:66203711|66211597	-4.43089537877467	0.00971258743371333
chr12:66203711|66217235	-5.79078542598849	0.00013194390904961
chr12:66203711|66228370	-3.35052048816598	0.000716509626956933
chr12:66209456|66217235	-6.40678791543494	7.1910257972958e-06
chr12:69251129|69262562	-2.68422531206797	0.00106853632031036
chr12:69800209|69801721	-2.06480863423171	0.00759768141571231
chr12:70278132|70311017	-2.43080497320363	0.0137276755429824
chr12:70380197|70381594	-3.34616853218349	0.030172451828417
chr12:71656885|71660427	-4.29702539638905	0.00383856368571355
chr12:76487510|76537986	-3.3271555577797	0.00523054218260213
chr12:88106675|88107098	-3.41887357286152	0.013288846550324
chr12:89459638|89472275	-6.0472321716465	7.0566083224124e-07
chr12:89466770|89472275	-6.12432039140943	2.40975965922009e-07
chr12:89619999|89635251	-3.39298568771452	0.0289049273063931
chr12:89655679|89677816	-4.36295524471376	0.0104495107311305
chr12:92798892|92799086	-3.48160054262871	0.0127489916381568
chr12:94169153|94186473	-3.38882548163529	0.000418073936281708
chr12:94220016|94227235	-4.23642771945398	0.0119591614536606
chr12:96298869|96300360	-3.12037033425113	0.016213449138123
chr12:96323948|96334865	-2.87464277219986	0.00657358564257248
chr12:9680923|9694969	-3.22423319290328	0.000370544720077179
chr12:98677425|98686873	-5.69724547278793	0.000230447517261765
chr13:102622877|102627924	-3.91323972794256	0.000137221826120803
chr13:108243532|108251316	-4.43566546977753	0.00105665978353911
chr13:113999585|114000932	-6.37340511252708	8.29053554113e-06
chr13:114041000|114052155	-4.84449907929179	0.00396088497256196
chr13:114041000|114057474	-6.38673733574528	7.79005638307326e-06
chr13:114041000|114073837	-4.32874987092591	9.99282294707514e-05
chr13:114052052|114057474	-5.01158742157319	8.12858558886421e-05
chr13:114052052|114073837	-5.64626207876688	0.000265430819550768
chr13:19824920|19825235	-3.955083887126	0.0195501519446794
chr13:19851355|19852190	-2.91371602853316	0.0132192761983215
chr13:20596150|20597119	-4.31791113958808	0.0109528276775588
chr13:20731841|20732121	-2.68850194310013	0.00969022545203361
chr13:21400373|21421164	-2.9451586361644	0.0418059404576752
chr13:24475472|24478276	-2.79588497025009	0.0393421546429146
chr13:24477701|24493733	-3.36376341774023	0.0218030092561408
chr13:26400453|26401624	-5.05289768048962	3.01490682714577e-06
chr13:27427092|27430621	-3.56722575121812	0.00151607769055579
chr13:28174272|28177935	-3.97199373694766	3.3062702271671e-05
chr13:28174272|28197346	-4.0982850097817	0.00778548310556499
chr13:28256292|28261458	-3.61236700627713	0.000308159786393762
chr13:28260447|28261458	-2.67378928620795	0.0269139241089719
chr13:30630835|30631474	-3.0389601941765	0.0233247588255763
chr13:31215051|31229294	-3.33010942898209	0.0168451304541041
chr13:31941308|31946181	-5.06523738363072	0.00029731930680783
chr13:32480590|32527532	-2.91565260566636	0.0463960911032967
chr13:32517857|32527532	-3.32338744719319	3.57025697255484e-05
chr13:32521373|32527532	-3.42084813037042	0.0272518394217488
chr13:32732101|32735330	-3.78947033572499	0.0001771206538228
chr13:37040405|37051583	-4.41510076148207	5.4705946063044e-05
chr13:40826506|40855815	-4.57425857116503	0.000187078713566885
chr13:40836597|40855815	-3.55288270892391	0.00406699177180766
chr13:40942952|40943925	-4.87997414482584	4.72229776438731e-05
chr13:41252645|41254620	-4.2788765713413	0.00553717092974864
chr13:41466823|41468838	-5.69468618166477	0.00023296639764274
chr13:41811225|41819386	-2.89277610628619	0.00502047002247366
chr13:41865736|41868477	-2.73400163019426	0.00852081792693656
chr13:45336536|45337388	-3.26380949331599	0.0156918915896268
chr13:45516143|45525051	-4.28994884358564	0.00038787435647667
chr13:45516143|45530780	-6.79893323509117	4.84358649019043e-07
chr13:49168613|49178654	-4.82038905464897	0.00408894310597864
chr13:49451553|49451909	-3.30367566287637	0.000114872521570919
chr13:49451553|49461162	-3.5700376412609	0.0069109376355912
chr13:49451553|49467960	-2.76435431680687	0.00710592196096156
chr13:49480219|49483563	-4.82152079203234	0.000928317603095548
chr13:50746733|50764508	-3.15257429824772	0.0307528998775963
chr13:50927407|50949505	-3.83542602460295	4.43122036818319e-06
chr13:50927407|50960171	-5.12587772364335	0.000283668430306389
chr13:52417992|52427219	-2.8687740090633	0.0090379205235148
chr13:60439688|60467379	-2.99333096797953	0.000400485204025078
chr13:72778187|72778380	-3.39122303156276	0.00508086204427137
chr13:75560753|75569507	-1.87919083658936	0.0429679033280379
chr13:75621763|75727098	-4.83493059002362	0.000894688188117683
chr13:77015409|77021861	-3.84891581884171	0.0103760949443481
chr13:77126318|77129230	-2.68620572834307	0.0133103336764967
chr13:77719532|77753358	-5.13493104954791	4.65036530523977e-07
chr13:99238427|99244624	-4.0929482835167	6.6519382571328e-06
chr13:99243832|99244624	-2.99866018669484	0.0143549107255186
chr14:101901719|101906529	-2.860277961876	0.00480655855576982
chr14:102040236|102040673	-3.7201802615532	7.50027991048521e-06
chr14:102193463|102195120	-3.37789136158798	0.000357733756699707
chr14:102194938|102197847	-2.40115228287772	0.0241083539216968
chr14:103398951|103405267	-2.76421344240064	0.00664912029919481
chr14:20395450|20395949	-3.2489018279569	0.012827891230515
chr14:20403377|20406400	-5.27208201948607	0.00174818765085033
chr14:21503173|21503881	-1.62349258975477	0.044625959771655
chr14:22906195|22911403	-2.46927537991991	0.00503274055420774
chr14:22909483|22911403	-3.70150671993982	6.47777320372283e-06
chr14:23081748|23090633	-3.48036144189492	0.0196690402218372
chr14:24209890|24211829	-2.46330652477978	0.0480071844464352
chr14:24211415|24211829	-3.30949639236136	0.0162435725282583
chr14:30670256|30675065	-3.96068837893151	3.21001881286438e-05
chr14:30955620|30956242	-3.10257413611421	0.0157865919289121
chr14:31127785|31172122	-3.15648980404529	0.0301598150241489
chr14:31133238|31133675	-2.58875691515232	0.0216138902819305
chr14:31168298|31169468	-3.15376375935382	0.0391949236882957
chr14:32090502|32094386	-2.2291504290851	0.00623554437979176
chr14:34567686|34568013	-3.21672644765089	0.00136334796619529
chr14:34800224|34802988	-3.9834045431466	0.000358482848502536
chr14:34862044|34862322	-3.24596072633657	8.07859684787237e-05
chr14:35096558|35099384	-4.48570051746708	0.00193890393620075
chr14:35126735|35127611	-3.36278820331985	0.00153478166966382
chr14:35126735|35180777	-2.68504957955378	0.0287726964894313
chr14:39154211|39158402	-4.56848910323058	0.00157239935914017
chr14:39154211|39159550	-5.2753574011905	0.00173600553677133
chr14:39158285|39159550	-3.23193039534744	0.0115336710596264
chr14:39179091|39179462	-2.27590981139348	0.00576287008490191
chr14:39276934|39279537	-2.87765505087953	0.000519865439674287
chr14:45118028|45130790	-3.93101104121599	2.98188150888034e-06
chr14:49602370|49608121	-4.25084711031703	0.00583800548592034
chr14:50150008|50150230	-2.52413541969483	0.00279467032974835
chr14:52511240|52544371	-4.25695987246093	0.00012901420175312
chr14:53156243|53189936	-2.47324926172647	0.0410080450822949
chr14:55612019|55619312	-2.15030845753743	0.047520764124312
chr14:58215205|58223856	-3.72191468253657	0.00906166814975583
chr14:58318542|58330169	-2.97220802982763	0.00458523643436887
chr14:60149353|60153178	-4.02877484449066	0.00208854898287117
chr14:61721509|61721823	-2.99447628053935	0.00122248713889113
chr14:63998914|64022863	-2.6827348925341	0.00835548118432782
chr14:69122217|69149503	-4.34037647157294	0.0106908873440219
chr14:71026117|71036157	-3.12653174089034	0.0083983594917578
chr14:71400794|71418196	-3.44246907571786	0.00049203549636507
chr14:71413948|71418196	-3.93174249029957	6.09275879390054e-06
chr14:71413948|71467247	-3.65016618066612	0.00636358488894427
chr14:71413948|71529370	-3.65933720093676	0.000171915077614213
chr14:73147795|73148094	-2.80885503519097	0.000755475573822813
chr14:75109685|75110371	-4.01497569916897	4.82141520568081e-06
chr14:76166663|76180849	-3.72978943736516	0.00105182640579795
chr14:85978970|86070967	-3.35301228832211	0.0188077438201113
chr14:86028369|86041833	-3.02039314437109	0.00187774238622551
chr14:89161701|89162969	-4.2506402992143	4.65302143294116e-05
chr14:89411934|89412490	-4.25010493666133	0.000386028399387723
chr14:90943078|90947550	-3.8698283868456	0.0218047217547684
chr14:90978306|91001159	-4.99023965187572	4.49618825784463e-06
chr14:91338005|91343657	-2.6962421667808	0.0174813759927404
chr14:91342380|91343657	-4.53919525062295	4.71342600690543e-06
chr14:91797785|91802421	-6.79454165667708	6.07882580393639e-07
chr14:96555847|96556413	-3.05126009889034	0.0338068725690875
chr14:96560649|96562893	-3.7339636055929	0.0127985420145864
chr14:96560649|96565214	-3.74156000699631	0.0123733270204594
chr14:96833467|96860735	-2.03593817351242	0.0105032971255867
chr14:99231345|99257836	-6.53509784744324	3.34400013521627e-06
chr14:99231345|99257839	-5.02461264310267	4.6767475126062e-06
chr14:99257471|99257836	-4.52774549657101	1.09777540853753e-07
chr14:99257471|99257839	-4.33902076318722	2.83152230027789e-07
chr14:99458279|99465813	-4.05759567001232	1.19171999717844e-06
chr15:100330889|100334180	-2.75036154756292	0.00202891526156873
chr15:100564688|100565265	-3.14265931172631	0.0308607084545227
chr15:100564692|100565265	-4.58268305319721	1.12334250315779e-07
chr15:100564692|100566453	-3.65650667188115	0.00958882329833324
chr15:23008699|23010133	-3.25881312799914	0.0257482724469561
chr15:25354353|25360527	-4.72027194014724	0.0011118399857054
chr15:25405461|25411971	-3.5687179399398	1.1479904734689e-05
chr15:25405461|25421961	-3.24500702567265	0.0263577004833656
chr15:38502312|38505920	-7.75711680578775	2.40758159798844e-10
chr15:41085369|41087682	-3.90032729952443	0.00154967163388292
chr15:41668828|41669958	-2.27520203103929	0.00323328452254923
chr15:42260958|42268032	-2.25069449992969	0.0255270230893188
chr15:42827928|42840433	-2.72486693788092	0.00473789909833998
chr15:43756649|43763206	-2.65007663461202	0.0427703777709577
chr15:44331988|44338317	-2.81197515492572	0.00112297404179165
chr15:44484224|44490999	-5.80442156199166	0.00012685952882635
chr15:44550876|44551522	-4.65809903485829	0.000234669506935861
chr15:44615363|44620403	-2.14705055772121	0.0493388827686445
chr15:49137150|49139653	-3.25793441537535	0.0347386859204372
chr15:49235851|49239367	-2.19403271643755	0.00620889723534339
chr15:50300789|50301368	-3.53978566987069	0.00397968252385113
chr15:50465047|50471795	-3.13655171789428	0.00999368799949901
chr15:51451645|51455228	-3.62954587231025	0.0101988210568418
chr15:51781044|51782828	-4.07907003216797	0.00103005507961668
chr15:51896419|51902036	-4.33327008311101	0.0108006428651949
chr15:51900155|51902036	-5.23926578279495	0.00182956549281705
chr15:58886975|58887540	-3.96597105718375	0.00113119210397126
chr15:58912563|58916999	-3.29618751750231	4.6384214571785e-05
chr15:59030804|59031702	-2.15878940279293	0.0289698632977031
chr15:59671183|59672739	-2.74931487296741	0.0225412246357901
chr15:60442416|60445791	-1.86205589004295	0.0191800369736884
chr15:62007308|62013992	-4.90632968761324	4.52600923699543e-08
chr15:62033441|62044255	-2.96698408712242	0.00224037466134379
chr15:63529014|63537156	-3.50739796256764	0.00376572235447755
chr15:63532647|63537156	-5.03416384077444	1.27052760820837e-07
chr15:63553715|63563008	-4.02830649675012	0.0030837134541702
chr15:63696124|63716473	-2.68115420566349	0.00271521078784261
chr15:63706780|63716473	-3.15524399993855	0.00681557080474995
chr15:63712775|63716473	-5.5417529347252	0.000351766358085753
chr15:64118117|64118854	-2.35128763914716	0.0295854445527452
chr15:64204441|64204949	-3.25340182588119	0.0176158126911567
chr15:64499293|64500166	-2.32579290970619	0.00245522051612487
chr15:64974602|64983593	-3.05400815430654	0.00103626823417854
chr15:65178934|65180204	-2.02411807235224	0.0354346823759692
chr15:65478880|65480399	-2.96254845593684	0.0428030783336925
chr15:65729072|65738875	-3.76023300737193	0.00754469411254061
chr15:68141946|68146700	-3.59971009763018	0.000120918827363105
chr15:68175637|68176654	-5.27776068602805	0.000132891943347434
chr15:74926766|74929232	-2.45600947859715	0.0326677132586844
chr15:75854386|75873568	-3.56848174985437	0.00491113743098916
chr15:75854386|75883424	-3.3834777674652	0.0286860277867757
chr15:75859878|75873568	-3.29858693743968	0.000386584367835671
chr15:75868951|75873568	-4.3527529800925	0.001895695612693
chr15:75876187|75883424	-3.20398890788939	0.018303196579658
chr15:77365163|77388802	-5.87704711700916	0.000103919036241478
chr15:77467095|77471814	-2.96887587476569	0.0272491760269049
chr15:80120328|80122800	-2.97136311471114	0.000191350994999731
chr15:82382208|82382879	-6.91747359740426	1.88668016973443e-07
chr15:84680713|84691644	-2.60886789272032	0.00265195823333883
chr15:84687625|84691644	-3.82751079496037	0.000120882968813988
chr15:85113873|85115487	-2.82913173329916	0.0350107430910625
chr15:85113873|85121014	-3.38467548457519	0.00485031722314682
chr15:89113725|89116521	-1.85160658309302	0.0187582437767934
chr15:90439332|90443478	-2.24479856907789	0.00466523452515522
chr15:90441506|90443478	-2.34935281407498	0.00579165949206623
chr15:92885515|92892072	-2.62417853006473	0.0358799485292976
chr15:92924321|92929091	-2.68026110941475	0.00634467582031178
chr15:92996957|93002317	-3.68839393865064	0.000434429468188157
chr15:93000512|93009323	-2.78757112449963	0.0392292568322331
chr15:93014696|93014909	-3.74777732430342	0.0124817705755051
chr15:99598430|99633173	-6.1167239682991	3.58230660794023e-05
chr16:10419581|10473989	-5.08268594935794	5.61551914130307e-05
chr16:10430611|10431455	-3.21203994601047	0.00164723922313735
chr16:10473479|10480964	-3.17856979945373	0.029026838907404
chr16:11020193|11024921	-2.98949588979105	0.0257796802093492
chr16:11846501|11846843	-3.37257061953618	0.00127896677000683
chr16:11846501|11847806	-2.50947088494024	0.0154646384282903
chr16:1314020|1320517	-4.07854872560968	2.41951489923882e-05
chr16:14627106|14627336	-3.86069815940846	0.000507982894734286
chr16:16007816|16016621	-4.38551656113125	0.0101948618674309
chr16:16014491|16016621	-3.75189985962293	0.0123783668887403
chr16:17258988|17259498	-3.21264924937643	0.000621840098864829
chr16:1809238|1809833	-3.52412675358906	0.000102962727070546
chr16:18797925|18798834	-3.47849969310839	0.00254872074987591
chr16:18841565|18845651	-2.52976906268201	0.00387956006953268
chr16:19616114|19626223	-3.20936278382202	0.0181499211343616
chr16:21612645|21625115	-3.11523669651088	0.0128718692913512
chr16:22349279|22349849	-3.30949511774267	0.000274126898647959
chr16:24032136|24035547	-2.21391028957633	0.00842742989282148
chr16:27211146|27215008	-3.17608458069013	0.0193414249227486
chr16:27213585|27215008	-4.03621753368408	2.18334422404012e-05
chr16:28166508|28169909	-4.78898362963184	0.00091873416674451
chr16:29833733|29834066	-2.51313557766285	0.00514610538426346
chr16:30479091|30479461	-2.54329835464813	0.0026053088292537
chr16:30483827|30484263	-3.62517077779322	1.05484661810624e-05
chr16:30496097|30496566	-3.33307670169067	0.000159661742425055
chr16:30499074|30499489	-2.82311520419117	0.00164425524904631
chr16:30713208|30713711	-5.57310201835593	0.000322661830196409
chr16:30728966|30729572	-2.80565157561403	0.000831935566245378
chr16:31090775|31091342	-3.85819730615205	7.55849836392591e-06
chr16:31361836|31362753	-3.39871265950582	0.00232091884030224
chr16:31722626|31723353	-2.35101187375575	0.00735408826691053
chr16:346148|347106	-3.35480379765945	7.78441351714124e-05
chr16:3979116|3983440	-4.21489894111694	0.00464954350953113
chr16:4405491|4413404	-5.46785961362099	4.95619111303436e-05
chr16:48347507|48348290	-2.92688770021564	0.0149066261952947
chr16:50786855|50793664	-2.97269155855303	0.006929453748136
chr16:53141179|53157541	-2.37845626335081	0.0120160712842887
chr16:53439016|53447106	-3.58492495338438	0.000911170428661748
chr16:53498391|53500329	-4.16676492644922	0.00683402160153988
chr16:53873786|53888951	-2.1886157669704	0.0206348457742539
chr16:56385919|56389375	-2.22151956593799	0.0413535580540032
chr16:58559804|58560362	-5.85550371188321	8.63826211355841e-10
chr16:66608309|66610003	-3.1441071727724	0.00319581039314647
chr16:66805777|66806026	-3.24596131138896	0.00362969551281676
chr16:67628370|67629533	-3.07791950880101	0.0176061237399964
chr16:68121987|68123121	-2.00826881265392	0.00979607424471253
chr16:68121987|68126610	-2.79385534287905	0.000387184399909756
chr16:68190768|68191775	-5.23926578279495	0.00182956549281705
chr16:69370483|69372355	-2.36289532621283	0.00394343683370022
chr16:69695136|69695379	-2.40508099128876	0.0070854434923197
chr16:71745144|71745614	-4.13055324358962	0.00732714496140548
chr16:74457874|74459789	-3.14698471530321	0.00515577859837144
chr16:74459682|74463479	-3.63521874009896	0.00242631904456543
chr16:84740309|84745673	-2.41369447739003	0.0397340520710591
chr16:85633914|85634132	-1.65895019472762	0.0302017514261937
chr16:88027483|88038011	-2.13385096182059	0.00919639284752894
chr16:88485939|88489153	-3.21468067022466	0.0096042320351275
chr16:8858350|8859335	5.40330219706338	0.0225613298819179
chr16:8920359|8930397	-5.2762220560148	4.31656599879765e-07
chr16:89418284|89422305	-3.57341241904304	0.0163957205785811
chr16:89733482|89737905	-3.79315141439242	0.0248228669505259
chr16:89978810|89980336	-4.23642771945398	0.0119591614536606
chr17:1050050|1100735	-4.23642771945398	0.0119591614536606
chr17:12054889|12081530	-4.08296544709494	0.000449949846435966
chr17:12054889|12095694	-3.89829778901779	0.0013233727367544
chr17:12054889|12113360	-3.78258062159793	0.00105375075723122
chr17:12081356|12095694	-5.25904426394079	5.12952524402859e-07
chr17:12095575|12113360	-2.58944892820651	0.0479897305381251
chr17:14074323|14077056	-4.13055324358962	0.00732714496140548
chr17:1842803|1844686	-2.95931403616066	0.0278790371225107
chr17:1842803|1853189	-2.92612543735167	0.00203130869657067
chr17:18865469|18865952	-3.58658003218175	0.000566987541376169
chr17:19958014|19958571	-3.94701332866136	3.21278619764438e-05
chr17:20204333|20205912	-3.97311918795295	8.76294826238021e-06
chr17:27303367|27309272	-2.58099848405423	0.022484523154449
chr17:29451455|29451680	-3.15887662935084	0.00736156243238611
chr17:29482197|29491865	-4.31111910369716	0.0053395492250511
chr17:29648144|29672129	-2.73822440251146	0.0294646115980597
chr17:29676820|29677741	-4.28543084882806	0.00563466664487488
chr17:29684563|29703062	-3.60313791955415	6.11195426507117e-05
chr17:30481143|30492753	-4.88705530925983	0.00374450614281017
chr17:30734897|30759539	-2.96917231448772	0.0179775773954619
chr17:30803901|30804108	-2.86531843242882	0.00976293746849591
chr17:31982999|31988497	-1.9121451353278	0.0218659400731026
chr17:36952886|36953907	-2.28447935501558	0.0403248345477531
chr17:39264175|39265453	-3.77255884365064	0.0149395497588734
chr17:39423327|39427790	-3.72982008591927	0.0129052106674116
chr17:4066447|4072756	-2.89994399715971	0.00655961998712975
chr17:42500707|42501304	-3.78647803661258	0.00827967739586648
chr17:42727635|42730918	-3.12986103309639	0.0154915946380134
chr17:43378752|43379262	-3.69376523203873	0.00837056201660251
chr17:45081644|45086652	-2.93428347689602	0.0152534445302712
chr17:45475100|45475726	-1.97873188074472	0.0209936300058932
chr17:47326226|47345098	-3.54326824161102	0.0127017681753546
chr17:47618350|47619164	-2.58869077901483	0.00552582145515225
chr17:48109967|48118037	-4.25563211833483	0.000917976631027827
chr17:48133535|48137337	-3.36272860125053	0.00788150442697195
chr17:48396680|48412537	-3.71042308158662	0.00847259097152327
chr17:49311312|49312042	-4.16861277305633	1.13647876582997e-06
chr17:49311312|49312845	-1.73233441915359	0.0450964649751379
chr17:49719760|49720436	-3.79645582120187	0.00592864396707574
chr17:51263274|51268904	-3.19145348482915	0.000703277909845313
chr17:5365122|5368468	-2.93279190272745	0.0182371524778943
chr17:55401469|55403868	-3.77733166219293	0.0021517483284221
chr17:56844019|56848065	-3.44532742935207	0.00556028502146525
chr17:56901419|56904488	-3.01910787512835	0.0266991772275156
chr17:59353215|59353526	-3.07202102043298	0.000290793215136106
chr17:59731421|59738947	-2.76426351516594	0.000695201219984807
chr17:59764971|59773885	-3.60510883863767	0.000516861291666617
chr17:60460663|60462061	-3.65810087164004	0.00904498476341842
chr17:61921725|61925099	-3.17024496126554	0.0235538002155429
chr17:61984171|61985090	-3.03080198022585	0.000877977509349226
chr17:62010550|62063301	-4.53920959406867	0.000301452395826066
chr17:62029541|62063301	-3.955083887126	0.0195501519446794
chr17:62033787|62035608	-2.85109058424548	0.00244293953495858
chr17:64052780|64053371	-3.15376375935382	0.0391949236882957
chr17:64212574|64214242	-3.01377476189227	0.0473862314889573
chr17:64490824|64492367	-6.06383417327923	4.27431945610753e-05
chr17:64821767|64822393	-2.54998309405193	0.0311915164589347
chr17:65549520|65558736	-3.88902856656057	0.0046771411194353
chr17:66496201|66514466	-3.24560046065881	0.002179483049131
chr17:66513336|66514466	-2.77156131584026	0.0120837577638073
chr17:6659925|6661413	-4.77761182675309	0.00432083280568318
chr17:67945409|67948306	-2.47261748776294	0.0149923493181182
chr17:67945409|67975958	-3.13617140888823	0.000112490681107238
chr17:68209654|68210465	-4.36155457561564	0.000184586401302637
chr17:69273959|69284072	-5.23926578279495	0.00182956549281705
chr17:75042181|75042659	-4.61241727673586	0.000103929252917805
chr17:75242336|75243570	-4.88138392871485	3.32973323432641e-07
chr17:77402059|77402703	-5.47601386836618	1.46632011402896e-05
chr17:78004170|78031842	-4.50334217403452	6.80448787711318e-06
chr17:78079395|78083166	-4.84828309139001	0.000862258073235474
chr17:78400735|78401057	-3.08277582619679	0.00482815506231345
chr17:79077430|79077864	-4.28085449422119	0.000152967367958288
chr17:80891720|80893865	-3.60146191493489	0.0156147371172246
chr17:81604548|81608822	-3.6031006528493	0.0335037750148433
chr17:81693654|81694853	-2.81342816782071	0.025501027876494
chr17:82905936|82911789	-3.28054626103307	0.00353772662325368
chr17:83035035|83048785	-2.96652029021976	0.0383829191780222
chr18:12999421|13019206	-1.84196985938959	0.0216200703115636
chr18:13099476|13103588	-2.73635894595806	0.0386543626344792
chr18:13387341|13438384	4.88354018252766	0.0491773923555323
chr18:196637|199316	-3.91963416341393	0.010780471374322
chr18:21564203|21568094	-3.8553255785324	0.000561093007074822
chr18:21656861|21659343	-3.12852341492896	0.00403075834784021
chr18:23506970|23509279	-5.69724547278793	0.000230447517261765
chr18:23507985|23509279	-6.27265922776201	1.58612664023493e-05
chr18:24064140|24069271	-3.61533029811231	1.56793802116472e-05
chr18:24064140|24083081	-2.5788464985685	0.00140137002366749
chr18:2666157|2674145	-2.90463966285889	0.0137039727071936
chr18:2694527|2698041	-3.45928345500293	0.0487222144053098
chr18:2718158|2718434	-3.58642047810275	0.0115869646072387
chr18:2724899|2752552	-4.54637260543656	0.00166525022041302
chr18:2732265|2740821	-3.96266133378254	0.00999854258814752
chr18:31832084|31839457	-4.63290605557884	0.00198587783486696
chr18:32111754|32113860	-1.66088140102332	0.0283240871949746
chr18:36026900|36033837	-2.42295892427032	0.0317191200980461
chr18:46118181|46128837	-5.67391745987637	0.000246061732385886
chr18:46122467|46124893	-4.33327008311101	0.0108006428651949
chr18:46125744|46128837	-5.55747188734309	0.000336902481094892
chr18:46215811|46216595	-4.23642771945398	0.0119591614536606
chr18:47865059|47896809	-2.60294734724062	0.0211437073197821
chr18:49331864|49379758	-2.44318921959997	0.00794848127005932
chr18:49363161|49379758	-2.25142336652162	0.024223541424364
chr18:54271360|54274090	-3.68364229028675	0.000296276799513272
chr18:54271360|54277853	-5.30481411403441	0.00166987408079861
chr18:54271360|54277855	-3.33615842585451	0.0225348482516805
chr18:56731383|56758953	-3.08368488466919	0.0431532321294813
chr18:56756583|56758953	-2.74954507038132	0.00358963241424448
chr18:58578814|58580548	7.41374190274261	6.70098334861437e-05
chr18:58696366|58700591	-3.39139188699946	5.60820495625274e-05
chr18:62282262|62287467	-3.84564040461926	0.0224846699336779
chr18:62539681|62550460	-2.62558787661659	0.00173178648918301
chr18:69831053|69832739	-4.77761182675309	0.00432083280568318
chr18:69873144|69896045	-4.38551656113125	0.0101948618674309
chr18:69947003|69956795	-5.30801839308397	0.00165828258592501
chr18:76849526|76851939	-2.88530021602836	0.000403703510863349
chr18:79096476|79126375	-3.73219410167615	0.00423712459309619
chr18:79126267|79154555	-4.47790018910209	0.00266104611941647
chr18:79277054|79307234	-4.8259388722757	0.004056588531828
chr18:79410403|79411501	-3.00458033121684	0.00101159641948177
chr18:79695225|79704917	-6.04283672454557	1.59134832529767e-09
chr18:79695225|79718016	-4.38402078462662	0.000820530867005339
chr18:79728907|79736521	-3.26185073594347	0.0252531153516238
chr18:8076455|8088851	5.61485556892976	0.0152198996898631
chr18:9182382|9195698	-3.04963364978745	0.0026614111411996
chr18:9182382|9211784	-4.41125465689491	0.00160552708138843
chr18:9182382|9221999	-1.83393397807393	0.0153173768859125
chr18:9208657|9221999	-1.67999327526616	0.0466650145768126
chr18:9208657|9239556	-3.06014576566236	0.0459259634678029
chr18:9524594|9525851	-2.84272659945441	0.000522998383087516
chr18:9583117|9595102	-3.89572534989397	1.87592790134885e-05
chr18:9583117|9595153	-3.06247024759655	0.00145286246965639
chr18:9931810|9937066	-3.94437122970185	9.11975281497971e-05
chr19:1032392|1032696	-3.01159279271221	0.000492719341405771
chr19:10795372|10798572	-3.56984960701452	0.034771952125839
chr19:11335447|11335783	-3.6045469344058	0.00148715786523312
chr19:11437876|11438124	-3.29518782838402	0.0329963057039679
chr19:12249978|12250368	-3.57896240009526	0.0012846577953111
chr19:12928342|12928847	-1.88597883918314	0.0255719646137172
chr19:14042453|14042789	-3.55315430683678	0.000288804471109282
chr19:14458031|14458375	-2.49523262302627	0.0163183364537992
chr19:16081913|16093753	-3.45928345500293	0.0487222144053098
chr19:17101660|17102557	-1.73728676560802	0.0384002468452343
chr19:17276495|17276909	-2.18713754095754	0.00756621305242301
chr19:17772457|17772741	-3.68663445431166	0.00893586734773777
chr19:18147443|18147624	-3.06868095862877	0.00192460898357469
chr19:18175040|18175697	-3.38150354016497	0.000710481887609665
chr19:18342859|18343415	-5.42674787592625	2.51593271214745e-05
chr19:18537601|18538436	-2.17489195694079	0.0107578238691017
chr19:18539371|18539720	-1.71864701722335	0.0283341243682405
chr19:18564869|18565190	-3.26406919170364	0.0274560252279526
chr19:19296989|19297344	-2.43986041194068	0.0348412058114725
chr19:19492306|19492712	-1.83824907366683	0.0450841501527304
chr19:19564933|19569584	-3.11411230744509	0.0307271985569876
chr19:19592506|19599365	-2.98140184091648	0.0494007541918212
chr19:1969508|1969959	-3.23524418165015	0.0288824555479348
chr19:20645684|20646405	-5.11281170499652	1.13869296455716e-07
chr19:21033456|21034184	-3.0313808723566	0.000179797233889562
chr19:21405129|21405856	-3.67492987648363	3.12619645262223e-05
chr19:2189732|2194577	-4.02814642222109	0.000660716593236906
chr19:21987216|21988909	-6.82061090463987	4.24728228028912e-07
chr19:22072809|22073564	-3.75187812919172	2.75541267974443e-05
chr19:23358430|23362725	-1.72548235857473	0.0227149710628502
chr19:23358430|23362739	-4.34037647157294	0.0106908873440219
chr19:23831597|23833521	-6.08044690186994	4.04446483983578e-05
chr19:24105940|24106643	-4.43089537877467	0.00971258743371333
chr19:29971193|29986417	-3.09046682086861	0.000419486280721432
chr19:29971193|30012531	-3.07229067363289	0.0437419011131863
chr19:29985223|29986417	-3.48805898604463	1.99784478220007e-05
chr19:33113767|33114419	-3.14229944412516	0.00133600822968795
chr19:34221507|34221738	-2.9101225031735	0.0311740641078506
chr19:34430576|34434968	-1.8247257174926	0.0261900303550994
chr19:3660966|3667353	-4.76883996036855	0.00069764759340656
chr19:37425868|37426378	-3.96294850178504	0.00552163415547771
chr19:38343580|38344368	-5.37302206564897	0.00151172042860431
chr19:38609596|38610025	-4.28832966513254	0.0113140448119175
chr19:39453356|39453521	-3.46653581336584	0.000926609164083082
chr19:40034950|40036626	-4.04187560079977	0.000439990897445806
chr19:4053971|4055247	-3.7656571966297	0.0150678399136931
chr19:40583398|40583717	-3.55393487805357	1.54593897341822e-05
chr19:40736986|40737769	-2.78139759517522	0.0160879347853377
chr19:41268223|41281275	-3.94798996222355	0.0102493223946005
chr19:41341883|41342247	-3.62926340139444	0.000220359324592072
chr19:42117250|42160392	-4.48067326976128	0.00263481890665532
chr19:4354949|4355173	-3.42087839220685	0.0115825713974134
chr19:43925325|43930000	-4.38551656113125	0.0101948618674309
chr19:45263113|45263367	-2.18145223127541	0.0240381570011257
chr19:45263113|45266281	-3.63617715747414	0.0149666653363624
chr19:45264684|45266281	-4.82099672543186	0.000836580864323613
chr19:45277923|45278615	-4.28765789372607	0.000147531267976797
chr19:45517663|45518094	-3.62264195608875	0.00639151787540386
chr19:45854175|45854507	-3.14180977130195	0.00662658901154694
chr19:46375604|46376574	-4.00812033051335	0.005304780321563
chr19:47264603|47264946	-3.97698890021957	4.00703114266203e-05
chr19:47289998|47292173	-4.38551656113125	0.0101948618674309
chr19:47362476|47362693	-2.02775977364892	0.023542810933587
chr19:48149763|48151339	-3.55620903724829	0.0108533180257492
chr19:48633444|48633655	-3.17230717008525	0.000666752464405543
chr19:49599272|49601918	-3.08124856484865	0.0446748002441105
chr19:5039836|5047669	-3.54307548402134	0.00828822383386478
chr19:50398851|50399484	-1.97770612888932	0.0342557607156027
chr19:52282111|52283413	-3.54722744880792	3.36243824231764e-05
chr19:55098784|55103568	-3.61260379821101	0.000229692177251171
chr19:5604583|5604936	-2.19539368793168	0.00448483165447026
chr19:5653115|5653420	-3.45338339609825	0.0260763021286795
chr19:57455653|57456182	-2.43185207922038	0.0186372049283781
chr19:5941621|5957973	-4.03127650267986	0.00207107079948728
chr19:8455405|8463686	-2.26697862409001	0.0189962937534893
chr19:8536252|8540028	-5.27208201948607	0.00174818765085033
chr19:8548036|8548317	-5.85239725489431	1.34432539028492e-06
chr19:8551740|8553437	-4.09586887808936	0.00618003374781322
chr19:8553139|8553437	-4.65338616920203	0.000103253400271752
chr19:8554477|8555796	-4.16547747409025	0.00531536993904376
chr2:101281859|101295181	-3.61842422627075	0.00150492104021776
chr2:106145190|106166083	-2.1157317761044	0.0132735747083233
chr2:106158058|106166083	-3.15951946750722	0.000126371661789469
chr2:108451028|108452466	-3.24764100905483	0.0258440582336049
chr2:108771701|108773046	-2.19422228242529	0.0133164250827548
chr2:112299849|112300029	-4.62139248712512	2.65846283015483e-07
chr2:112299849|112311937	-4.16676492644922	0.00683402160153988
chr2:112299849|112332282	-2.99299317261435	0.00526639056628368
chr2:113830852|113831585	-2.63907921347166	0.0210876678827071
chr2:113939959|113951845	-3.83389466728524	0.00366899423432002
chr2:119881786|119882623	-4.2659379624461	0.0115851992988141
chr2:119926598|119934958	-2.92295443268042	0.0433588922694584
chr2:119926598|119945240	-4.86033906083322	9.29267920640205e-06
chr2:120073178|120078581	-3.00626166886276	0.0385009856744995
chr2:121457687|121458975	-4.15235733277002	0.00156458385310395
chr2:121605701|121606180	-2.42395994997635	0.0118340993814519
chr2:121757240|121758806	-4.40948103000077	0.0011415172359383
chr2:121757240|121761524	-2.25294586981366	0.0134763243410215
chr2:134253095|134254644	-3.74131384016829	0.000310790907283109
chr2:134253095|134270550	-5.57310201835593	0.000322661830196409
chr2:134317529|134318739	-4.51043500082459	0.00182148735674411
chr2:135675332|135680324	-3.00272113819866	0.00280278468323826
chr2:135748267|135761911	-3.02877769524666	0.0122885122592372
chr2:135748267|135772547	-4.2659379624461	0.0115851992988141
chr2:143435601|143437042	-3.651265061126	0.000480012841783421
chr2:144208603|144211579	-3.5259316477409	0.00287505017568572
chr2:147896301|147899898	-3.57117923191956	3.09166876974318e-05
chr2:147972739|147975975	-3.99334075501213	5.27780010235453e-06
chr2:147972739|147982081	-2.40057209133078	0.0349045460244883
chr2:148178700|148233395	-3.25793441537535	0.0347386859204372
chr2:152143827|152150229	-4.29548240161521	0.0112186343578749
chr2:161179614|161224746	-3.01377476189227	0.0473862314889573
chr2:168129541|168140758	-2.48562579750775	0.00847638009191711
chr2:169872236|169878574	-2.936763405514	0.0207629701504867
chr2:171046174|171082852	-3.08124856484865	0.0446748002441105
chr2:171925537|171953001	-2.2044100971508	0.022429234185023
chr2:172558708|172565073	-3.76156295793459	0.0121719822271829
chr2:173954873|173956232	-1.77437660322452	0.0394475112744575
chr2:175111568|175121540	-2.67339743812781	0.0204127530035252
chr2:181354208|181362918	-3.44179412790369	0.0132470798347953
chr2:183133566|183159652	-3.45928345500293	0.0487222144053098
chr2:185483034|185502739	-5.67316027746823	0.000245987987404895
chr2:186081330|186099830	-3.84505851123878	0.00470946947194489
chr2:189805652|189818180	-4.14644425051537	0.000945882607193768
chr2:190655977|190673152	3.7085215952106	0.00294319100095508
chr2:190900564|190924593	-2.66492322017349	0.00121531797753279
chr2:190900564|190931637	-2.84276123705114	0.0317967244260073
chr2:191062762|191066515	-5.59167901575306	0.000308996926616366
chr2:195680032|195683906	-2.90581260719365	0.00285241922244094
chr2:195680032|195718332	-4.32142152850969	0.00524858067451647
chr2:196139620|196146055	-4.74190708383551	3.45298441885817e-06
chr2:197007806|197009031	-2.59814414968359	0.0210917201148
chr2:197078703|197090032	-3.73736185089923	0.00150583710315486
chr2:197503039|197503330	-5.20748739321686	0.00191392424676189
chr2:199368605|199381820	4.98347034627046	0.0436930991730955
chr2:199368605|199433514	6.54012768623774	0.00136539205948498
chr2:200856682|200856985	-3.82898166990016	3.11249373033197e-05
chr2:200931339|200933974	-3.23690446311852	0.0363018693788833
chr2:201129729|201149835	-2.63204303614037	0.0492095674309388
chr2:201145378|201149835	-3.215933664251	8.59067457872528e-05
chr2:201208075|201208467	-4.62726106915261	0.00200645470900563
chr2:202297379|202297906	-3.73981015605646	6.91241245867667e-05
chr2:202464809|202467689	-3.24030230945672	0.00438395828912933
chr2:202555252|202556531	-3.45928345500293	0.0487222144053098
chr2:202952559|202955758	-2.56966573138057	0.0293659827007282
chr2:202954005|202955758	-2.63570892814267	0.0430951236035171
chr2:203729648|203736104	-3.68334919215357	0.0174646351679847
chr2:206279540|206297373	-4.28985722105453	1.60267959278113e-05
chr2:20739971|20740205	-5.37607012129434	0.0015013477434178
chr2:208285726|208288818	-2.30315936967559	0.0252387227196277
chr2:218238664|218239484	-3.83658745981708	0.00365894419431866
chr2:218238664|218245546	-3.22229193458051	0.0212993364482136
chr2:218656150|218656463	-4.04102375363766	0.00136278725715367
chr2:224535528|224557856	-3.0838342975887	0.00439436914215899
chr2:226864604|226867318	-2.76470035359611	0.00212941689077853
chr2:226906793|226914351	-2.68470369432206	0.00496318331868239
chr2:230269532|230287966	-3.1423083453166	0.0214049318029641
chr2:230436381|230450255	-6.78048136873966	5.4616182398552e-07
chr2:232014835|232030080	-4.29548240161521	0.0112186343578749
chr2:232787150|232796221	-4.68624730012267	2.41141943644704e-05
chr2:232811244|232812491	-4.29548240161521	0.0112186343578749
chr2:233388257|233390483	-4.45574330879337	3.13851908242585e-06
chr2:233449959|233452060	-4.28832966513254	0.0113140448119175
chr2:233449982|233452060	-3.46225610548438	0.0127054438750213
chr2:238182065|238185287	-3.66920444605962	9.34453056345275e-05
chr2:23819747|23823569	-3.02800987637685	0.0173339630103442
chr2:23823258|23823569	-2.58120325730626	0.00778292572716642
chr2:23958301|23984831	-2.84075078706305	0.0203511098154796
chr2:239990074|240007370	-3.17301154332717	0.000744445917247977
chr2:239990074|240014860	-3.25352426210133	0.0150074750415834
chr2:240552914|240555055	-3.08368488466919	0.0431532321294813
chr2:241160332|241163401	-2.83544275413405	0.0282732041741108
chr2:241342992|241343897	-4.77761182675309	0.00432083280568318
chr2:24135119|24147086	-2.5946162807908	0.00232263359327906
chr2:241704653|241712071	-6.09037636552905	3.91339762179055e-05
chr2:24270671|24271941	-3.13732210262199	0.0423783357110255
chr2:24270671|24275849	-4.90091406161063	0.0036864714649098
chr2:24564295|24593721	-2.97271754401068	0.00220876816744836
chr2:26098662|26109906	-4.77761182675309	0.00432083280568318
chr2:26364302|26373629	-4.21586596400416	1.26401316307383e-05
chr2:29121374|29181697	-3.79315141439242	0.0248228669505259
chr2:30525587|30533314	-3.448405457773	0.000626756715344214
chr2:32087492|32089605	-4.12703030412718	0.00168557524428589
chr2:37019809|37020836	-3.01277809203826	0.013860289052579
chr2:37316237|37317179	-3.88425791563626	8.15558552659544e-06
chr2:39006412|39010703	-3.71596435182814	0.0132315770995671
chr2:43578513|43590954	-3.71646761122566	0.00832529116404797
chr2:44201186|44209327	-4.27543649595001	0.00157531033050784
chr2:44209210|44218537	-3.74045922393562	0.000107658972833357
chr2:44704283|44715353	-3.68494466282794	0.00371373611851211
chr2:45546732|45562756	-2.50744282017268	0.00403369160873334
chr2:48328561|48346751	-2.72729560766292	0.0039101662767515
chr2:48346201|48362707	-4.21646521410196	0.00252984758674705
chr2:53887259|53893799	-3.05375555357099	0.03127626221967
chr2:54982515|54987698	-2.97162582104325	0.00790563279673048
chr2:58084089|58089723	-3.63221011989717	0.000322910166313208
chr2:58221942|58232112	-2.01475632021955	0.0140438861315429
chr2:60781885|60783209	-3.69940404911065	0.0133292126270595
chr2:61482957|61490776	-3.19552762248048	0.0191681436380165
chr2:61495455|61499894	-3.97277667355814	0.00172215116122111
chr2:61522611|61526521	-1.87583787012137	0.0147902073345165
chr2:61522611|61533903	-2.40022117993578	0.00193977964595486
chr2:63856306|63857936	-2.65818659138538	0.00388889734463723
chr2:63962058|63984019	-3.34616853218349	0.030172451828417
chr2:68490190|68513680	-3.40750840038221	0.00102489986619161
chr2:71396141|71418639	-3.14945900924309	0.000136578326198533
chr2:72718103|72733118	-3.82054716810164	1.00440644206976e-05
chr2:72731007|72733118	-3.89786596774017	1.39481971140934e-05
chr2:74159091|74172752	-3.77941244867509	0.0117703540798487
chr2:74167014|74172752	-4.61551504967568	0.0020678012516433
chr2:75670138|75672016	-5.57310201835593	0.000322661830196409
chr2:8243565|8287558	-4.07558765278712	0.00342967482869096
chr2:84870225|84870785	-4.99564039882678	1.17627522932403e-06
chr2:85368686|85371562	-2.46311532922838	0.0221525743113976
chr2:85861181|85863485	-3.96228390107895	0.00014129940868996
chr2:86127161|86127991	-3.56071805394247	0.00548837306800884
chr2:86765027|86766024	-2.92190893593187	0.0404723971877057
chr2:8908621|8958642	-3.20263388833498	0.00799501179462893
chr2:97813971|97818721	-4.31731341684801	0.00529526793351483
chr2:99169550|99171429	-2.2997724394335	0.00365720516518778
chr2:99462496|99464985	-3.11996292971356	0.00152046328409077
chr20:18543019|18554390	-3.54249792838499	0.0117405340220768
chr20:20653530|20680801	-3.7339636055929	0.0127985420145864
chr20:21339044|21344208	-4.09702073567663	0.000213593996584893
chr20:21365421|21368590	-3.67294891445365	5.87070365208555e-05
chr20:23389946|23403072	-2.73649350881342	0.025166284641479
chr20:2923207|2965202	-3.29037792933706	0.0332813328653205
chr20:2947982|2965202	-3.51343414369475	0.000239666220915236
chr20:2964272|2965202	-2.55399345183184	0.00127303948326191
chr20:31527484|31528050	-3.04740215223343	0.0111815227633075
chr20:3218517|3218994	-3.21881045351216	0.00505463194703962
chr20:32366384|32371874	-1.86396911496229	0.0237375366105278
chr20:33619517|33623296	-2.41712355476583	0.00299120126092969
chr20:34031522|34033318	-3.80181747333956	0.000370398177969431
chr20:34762727|34768586	-3.45653421912749	0.012220534648416
chr20:35716740|35725155	-2.00572963591652	0.0431071175549762
chr20:35842573|35847434	-3.53285912238909	0.0363620758519717
chr20:35842573|35858381	-3.25793441537535	0.0347386859204372
chr20:35847350|35863400	-3.45928345500293	0.0487222144053098
chr20:35858302|35871829	-4.77589074189155	4.60083852629822e-05
chr20:35863013|35871829	-5.01880587441052	0.0031554020761338
chr20:36911218|36912552	-3.02220023282907	0.00104506039923606
chr20:37066724|37068186	-2.88851677675447	0.0231749118675651
chr20:37184180|37184373	-2.55859748001146	0.0286612236901529
chr20:41533050|41551360	-2.30007385049897	0.020048142432894
chr20:44995090|45001353	-3.00581186729119	0.0183245901079304
chr20:45000392|45001353	-5.22790148774933	0.00185802778201111
chr20:47276314|47287284	-2.62841402090781	0.0462507949382552
chr20:48690947|48692790	-4.53172121468952	2.08957166958622e-05
chr20:50902017|50904001	-6.07675408095012	4.12535230390097e-05
chr20:51516784|51523596	-2.50659043812112	0.020842221736287
chr20:54157169|54171670	5.91573326069777	0.00806737058157479
chr20:58438945|58441083	-3.16686127776059	9.46108212908687e-05
chr20:58667490|58673711	-3.83203669195834	0.00638165245063497
chr20:63928335|63931022	-4.33597416800551	1.90619418465906e-05
chr21:15762891|15766141	-3.34399986411766	4.80382038546922e-05
chr21:15833348|15842540	-3.06450486941642	0.00117641118717298
chr21:29326059|29329693	-2.40595317204784	0.0281287201228993
chr21:31700995|31706357	-3.3115481948537	0.0323046917767779
chr21:33432177|33432871	-1.90175784331351	0.0380655482190871
chr21:34102835|34125480	-4.52418321830217	0.000566109253397821
chr21:36247517|36248568	-2.24268490239537	0.00712859482025075
chr21:36247517|36251284	-3.48620284768492	0.0175596786290232
chr21:36338779|36344707	-3.43289458206465	2.08472534715655e-05
chr21:36362183|36364259	-2.4468122186428	0.0280327061162552
chr21:37420299|37421866	-4.00627258308873	3.7290903665039e-06
chr21:37420299|37425781	-2.83173205632389	0.0347564812485679
chr21:37420299|37430400	-2.10008915577603	0.0422775799503343
chr21:37420299|37472880	-3.17055655730732	0.000527013610967302
chr21:39206108|39212707	-2.36501219741083	0.00628275958441672
chr21:39224408|39229436	-3.19933770137424	0.0196968239475137
chr21:39228500|39229436	-3.72983584470915	7.51908878394889e-05
chr21:42994848|42995343	-5.82099832529227	0.000120816967429453
chr21:43746079|43749080	-2.92317746764439	0.0146054368771384
chr21:44855210|44861271	-4.1664268136883	4.17244105281466e-06
chr21:45128402|45134832	-3.14429572216694	0.00231936958150683
chr21:46349012|46349820	-2.71998284399044	0.0135870361784762
chr21:46643535|46644488	-2.8759635788681	0.010022732807011
chr22:16637040|16638740	-7.22152824321993	1.59129266451897e-08
chr22:21669913|21675115	-2.93145062990022	0.0105328603783948
chr22:23273081|23273774	-3.53103604787922	0.00379934448358047
chr22:31282294|31283288	-3.69196934045284	0.0041337924179616
chr22:31602212|31602785	-2.6117121173899	0.00600536673036287
chr22:32478981|32479275	-3.72412160865462	9.11391868604269e-06
chr22:36341370|36349255	-2.60415829771271	0.017284810236662
chr22:36523209|36524732	-3.22067205075744	0.036513715986827
chr22:38494630|38501280	-2.10090008683029	0.03538593869158
chr22:39138636|39141436	-3.76156295793459	0.0121719822271829
chr22:41342529|41343576	-3.70140670051332	0.000122459803447522
chr22:41583959|41584603	-3.34616853218349	0.030172451828417
chr22:41808875|41810291	-2.69417601304852	0.00477263909652129
chr22:42411407|42411736	-3.81760870620653	0.0110123396735291
chr22:43039780|43046573	-3.2430675826342	0.0020878847296951
chr22:45178238|45178900	-2.69701066544761	0.00311327885540854
chr22:45330603|45332710	-2.61712055154682	0.0347491850600944
chr22:45793545|45807022	-1.77584702520539	0.0473339931515322
chr22:46343262|46346544	-3.16499714057389	0.0187803373312862
chr22:46707843|46721015	-4.57539975403811	5.52115094039121e-05
chr22:46974290|46997709	-2.77125144321832	0.0191021112117943
chr22:49775591|49777813	-3.41708386195138	0.0137131547342199
chr22:49775591|49778103	-4.86304350287596	0.00386693610775797
chr22:49775591|49799119	-4.43089537877467	0.00971258743371333
chr22:49787390|49804360	-3.44192218978425	0.0405691403184065
chr22:49794034|49799119	-6.98324084555986	1.22944815280692e-07
chr22:49794034|49804360	-3.44277460401244	0.00873895720325739
chr22:49797805|49799119	-5.98186638249367	2.68332275816248e-08
chr22:49797805|49804360	-4.28621304043757	7.8299354421574e-05
chr22:49804204|49824331	-2.8924069328065	0.0322027423275397
chr22:50372020|50394135	-2.33721735241322	0.00438388908094372
chr3:107710452|107716849	-3.62623008394898	8.5391829862194e-05
chr3:113488945|113506605	-2.83046623676964	0.0336570641085228
chr3:11807833|11809682	-4.01135513783664	0.018207099691503
chr3:118726851|118745550	5.11400194540124	0.0355303934955417
chr3:119503532|119517315	-3.39319996105891	0.000534066238384101
chr3:120334862|120335953	-3.45928345500293	0.0487222144053098
chr3:121635735|121637256	-1.99047610152814	0.0457688535042081
chr3:121844453|121857156	-4.23642771945398	0.0119591614536606
chr3:122565859|122566070	-3.10455879841154	0.031205277996736
chr3:125313308|125331238	-2.45384026106263	0.0033445026162521
chr3:128060102|128060661	-2.71033724747367	0.0396468318815547
chr3:128262128|128264781	-2.82272231366099	0.00277265372748806
chr3:128795360|128813471	-3.05524478893106	0.0263004145239094
chr3:129880309|129880559	-3.33611035711953	0.000136868224301262
chr3:129880309|129880562	-2.30172687082419	0.0449331397250589
chr3:136464881|136502779	-3.021323040611	0.0348744761572422
chr3:136604309|136604473	-4.85831067303968	0.0039005552919062
chr3:138570318|138571356	7.14057658833783	0.00018027755260945
chr3:138570318|138572984	6.66811582365835	0.000892988134025119
chr3:141260123|141287453	-3.60763692300162	0.0332462224989623
chr3:141553857|141559995	-3.05256714748252	0.000423537637971614
chr3:142093061|142101841	-3.09393713243622	0.00606142231202807
chr3:142425222|142426841	-2.89808558308555	0.00403323999574438
chr3:149846011|149872154	-3.22018592316046	0.000347506332520876
chr3:149846011|149921227	-2.68726362883245	0.000796402166645353
chr3:149895473|149921227	-3.28621306723219	0.000602142674823436
chr3:150562542|150568292	-5.30481411403441	0.00166987408079861
chr3:150575649|150581746	-2.63142296991337	0.0453952014136135
chr3:152414941|152432920	-3.48919413397469	7.09888317977926e-05
chr3:15411245|15415942	-2.88974098701231	0.00564835895991016
chr3:155829688|155834041	-3.66888421211568	0.000758232244811708
chr3:155833468|155842619	-2.77722680378352	0.0133015458338666
chr3:156694020|156696025	-4.20838563534585	0.000417384906382678
chr3:16301626|16302748	-3.69919888840459	0.00112592911344031
chr3:16301626|16303592	-5.86942999099861	1.81690676435317e-06
chr3:170122591|170122744	-3.39176099694967	0.0207952231912635
chr3:170122591|170126007	-3.90622624745666	2.51057720310408e-05
chr3:170122591|170129552	-3.92697457331246	0.00284896473178427
chr3:170136419|170149244	-2.21283960162386	0.00454803971871787
chr3:170145423|170149244	-2.43958548394785	0.00284313277496533
chr3:170171373|170178938	-2.47890062603805	0.022830546605127
chr3:171188702|171194635	-2.8684730420855	0.00164722819371469
chr3:172247533|172251541	-2.90329396127646	0.000659317437187596
chr3:172362633|172381093	-4.93879028981814	0.00351236384946335
chr3:17622648|17625224	-2.87196077966493	0.044820916168876
chr3:179203544|179204588	-3.6557116135181	0.000128203899626062
chr3:179378341|179392104	-3.14986262897307	0.0040465991030264
chr3:179592644|179598771	-3.07507224697584	0.0340043523782052
chr3:179592644|179601790	-2.78380709640489	0.0361184971204477
chr3:182884753|182887713	-2.81232635600389	0.0489525482389599
chr3:183070999|183071357	-2.46711745523081	0.0332304683595796
chr3:183643480|183651276	-2.80487223630153	0.0240078184387137
chr3:18378170|18420991	-5.62552748370883	9.30377361014375e-08
chr3:183833492|183833825	-2.85862793544142	0.0409581482175806
chr3:18415111|18420991	-4.57156820729779	0.000353759164099024
chr3:18463480|18527326	-6.67915328747588	1.23179079344895e-06
chr3:195381009|195392147	-3.34216995130784	7.3541966604607e-05
chr3:195878253|195888606	-3.11826886154681	0.0059189597432516
chr3:195959183|195960086	-2.6394711980958	0.0294802554085062
chr3:196806579|196807914	-2.88888463699733	0.00133298295233632
chr3:197051577|197069260	-3.43619260171471	0.0188987775799911
chr3:197081051|197085756	-3.98042662647816	0.00966018746953198
chr3:197814908|197820430	-1.95464048966184	0.0452118826515064
chr3:197817176|197820430	-4.31731341684801	0.00529526793351483
chr3:197865423|197866219	-2.74252736206557	0.0207327511118942
chr3:197865423|197875775	-3.2678828992893	0.000229872924290774
chr3:197870160|197875775	-3.93107208074213	0.0201740323762604
chr3:20071584|20072459	-3.42428526745408	0.0131717206004098
chr3:27383153|27424152	-4.29548240161521	0.0112186343578749
chr3:27411642|27424152	-6.40408029369593	7.22241166632743e-06
chr3:27437388|27448797	-4.84449907929179	0.00396088497256196
chr3:27448651|27452498	-4.16801282890505	4.96770937223058e-05
chr3:30644747|30650460	-2.41067902571161	0.0497039720801659
chr3:3137260|3144710	-2.52623066598544	0.00798445429442914
chr3:3156219|3174261	-5.56346414339845	2.13378255630715e-07
chr3:31576396|31580096	-4.1534269338269	1.57097768613036e-06
chr3:31576396|31600459	-4.10432565863261	0.00181089452050803
chr3:3167634|3175269	-3.84564040461926	0.0224846699336779
chr3:32437955|32442013	-2.92150658692615	0.0131438792274524
chr3:32544876|32545965	-4.31111910369716	0.0053395492250511
chr3:32716225|32717237	-3.92633925090586	0.0203427053693056
chr3:33409236|33425741	-3.13302389625571	0.0146830359412848
chr3:33684359|33696933	-2.63735460991056	0.00173070848885083
chr3:33812072|33822082	-6.46143738309173	5.62576912516331e-06
chr3:3777725|3789074	-4.05810972847324	0.00243888199161556
chr3:38062169|38062801	-5.27208201948607	0.00174818765085033
chr3:43299754|43303792	-5.7262486383698	5.14980591122425e-09
chr3:47056821|47067118	-2.12567388258346	0.0492106598648368
chr3:47097955|47103423	-2.69589401109842	0.00823973375766538
chr3:47097955|47106120	-2.23915490438627	0.011260322177518
chr3:47635190|47636136	-3.87131954327136	0.00333751020130276
chr3:47635190|47638780	-3.30894755857797	0.0317111900943542
chr3:47918719|47921878	-3.48599219850882	0.0249312957472918
chr3:50105077|50105709	-3.05592281907747	0.0446669445921096
chr3:50108070|50108304	-3.96540876279979	0.000153346837985582
chr3:50252100|50253184	-2.8991373638477	0.015992687776242
chr3:51541498|51552063	-3.98133787846204	4.12552950097955e-06
chr3:51541498|51590559	-2.6393751242768	0.006776298602133
chr3:5174017|5174414	-3.25089120533277	9.20637834811279e-05
chr3:52412811|52414587	-3.47718481201333	0.000117575868202843
chr3:52687502|52690704	-3.88002175842334	0.00977338786629604
chr3:52737586|52741499	-3.07839200773465	0.00130158112706514
chr3:52926031|52928341	-2.38740502029574	0.00965375143907695
chr3:53290791|53292827	-2.91434470373727	0.0285540181595971
chr3:53874211|53876080	-2.41683359979523	0.0397928810602933
chr3:56563684|56571302	-3.46982583188908	0.013081610970103
chr3:56566594|56567053	-3.21539366327083	0.000143061675589932
chr3:56592970|56594028	-3.782065397792	6.18376536858206e-06
chr3:56627037|56628614	-2.8336903716029	0.000605491915383496
chr3:56660731|56673725	-2.01202271154927	0.0117343524136386
chr3:56668397|56673725	-3.53560201562249	0.0174936303664865
chr3:57242856|57248351	-2.43208255416506	0.0419541648419831
chr3:60011371|60014264	-5.24360679517417	0.00015037891688376
chr3:63912588|63913225	-2.05971920464713	0.019725757853773
chr3:66243203|66263379	-2.68010934713689	0.0185983684230264
chr3:66405198|66462509	-5.37769883676646	2.46602591245165e-05
chr3:67400731|67409034	-2.94488362714386	0.0148070923115966
chr3:67495798|67498295	-2.37978967740989	0.0199151504884505
chr3:67495798|67508903	5.64906475075757	0.0139217563998708
chr3:71015549|71053773	-5.43827004346431	3.77680227561781e-05
chr3:71041328|71053773	-5.12448793355727	7.0454787361727e-08
chr3:71684572|71699708	-4.62246752705857	1.636783190602e-05
chr3:71690010|71696520	-4.41342639214611	0.00291022017510905
chr3:71690010|71699708	-4.78743094316233	2.05273525899923e-06
chr3:71690010|71701096	-6.05195096805643	4.4612325159344e-05
chr3:71690010|71710484	-4.17403681949445	0.000148639315163012
chr3:8935871|8941804	-2.37484292974344	0.00850421627887553
chr3:93995874|94003908	-2.95889480779198	0.00669435035425165
chr4:10097711|10103986	-2.5601327844464	0.00839850626595002
chr4:102304317|102315830	-2.35607547205993	0.00967483809507617
chr4:102580535|102582957	-3.03791728805892	0.000887998578948833
chr4:102689574|102690957	-5.12660495238712	0.000283565262144024
chr4:102714438|102726683	-2.40907682904548	0.00414330116217134
chr4:102722871|102726683	-4.07567282959817	0.000149700935973397
chr4:104518577|104519454	3.16825049778869	0.00381694656553509
chr4:105424196|105456745	-2.07158408385215	0.0358270623765072
chr4:105446383|105456745	-2.4182035427809	0.0101245754725465
chr4:109462901|109463644	-2.6035659697796	0.0458059242734976
chr4:109462901|109473186	-4.34553339975246	0.00502235783745808
chr4:109530289|109531522	-3.22029589282461	0.0270844530695513
chr4:109659011|109664394	-3.1852426428824	0.000984091399404886
chr4:122170615|122175914	-4.34553339975246	0.00502235783745808
chr4:123056387|123057288	-5.64965641936261	0.000262633314995495
chr4:127921524|127939997	-2.84182931219275	0.000964781084284387
chr4:128074460|128077962	-2.24270107844805	0.0190394564609075
chr4:139116649|139139497	-3.4643847711078	0.00628036911748369
chr4:139125164|139139497	-5.333045390677	1.19907600614025e-06
chr4:139137630|139139497	-4.0065214362573	0.00224082560353587
chr4:143527868|143530526	-4.35544285898893	0.00274352509449928
chr4:143543509|143543972	-3.34478725980389	3.68807356372162e-05
chr4:145159503|145171720	-2.74889220091943	0.016967098798139
chr4:145162640|145171720	-4.35203606175824	0.00189587970484336
chr4:147633765|147634581	-4.23642771945398	0.0119591614536606
chr4:152411303|152412529	-2.70407957403412	0.000552759033717485
chr4:152411303|152469988	-3.25853616014217	0.000981486333196014
chr4:168220655|168237795	-3.59969929814035	0.0103075017237955
chr4:168236252|168237795	-3.98286840770883	0.00301974479800065
chr4:169507037|169508331	-4.66858660477845	0.000452477548357433
chr4:169580842|169590809	-2.8158254496139	0.045736812410902
chr4:17961903|17972885	-3.02526576612761	0.034591393495103
chr4:185247294|185267155	-2.15652164300194	0.030432240338857
chr4:185418441|185418770	-3.16121084303744	0.0239235919379934
chr4:22401431|22402799	7.13820341450176	0.000178784965757703
chr4:25847294|25847864	-2.82866688271634	0.0399972075299789
chr4:2657803|2672372	-3.45354513899743	0.049327513435072
chr4:3086939|3107423	-1.83387543000767	0.0252927151132464
chr4:36107565|36121326	-3.48030615540264	0.0128701435094974
chr4:36210390|36214480	-3.40329392573355	0.00525842072668168
chr4:36228582|36229645	-2.44235551923774	0.00170631282724012
chr4:38089932|38103157	-3.19213206970699	0.000168274611721773
chr4:39326563|39327756	-2.90848568298947	0.00633008238455998
chr4:4237827|4246343	-2.45706247859432	0.0467220083861143
chr4:48369849|48383784	-2.69230156410552	0.00177686461039523
chr4:48369849|48394653	-3.56045626634601	0.00504000191624914
chr4:48684673|48710698	-2.23205835299486	0.0126113648441213
chr4:51863437|51877854	-2.9068107175049	0.000862430560183276
chr4:51863437|51891851	-3.32167731924357	0.000135592273142934
chr4:53383773|53389873	-2.71326017880892	0.0386971672365391
chr4:53425872|53428183	-3.17129530174944	0.00488104653955488
chr4:55453054|55456300	-3.70206657212154	0.0169251814436178
chr4:56017648|56019555	-4.10013228290403	0.00321014243721883
chr4:56478379|56483270	-4.82038905464897	0.00408894310597864
chr4:5663107|5665649	6.07902045857022	0.00538285087721884
chr4:6598198|6600756	-3.2575935801487	0.00867657339164992
chr4:6923373|6924111	-2.49759384396529	0.00291866618048546
chr4:6994184|7001251	-4.37335456809346	0.000116468488375971
chr4:73085249|73092300	-4.02264874363567	2.46696032152741e-05
chr4:76134175|76144473	-2.40301109629808	0.00683702727913818
chr4:77742141|77776392	-4.06957943020113	0.00821949896308464
chr4:77756862|77776392	-3.8282421648749	0.00166070392714598
chr4:77773081|77776392	-3.85464316259929	6.28834436086482e-06
chr4:7868622|7872080	-3.27457334542819	0.00382727056658161
chr4:78826037|78851056	-5.30490338595563	0.00011941684289242
chr4:82856952|82857764	-4.04177439567717	0.0086552845471537
chr4:82878730|82881937	-3.52690068353814	0.0115177635857993
chr4:82878730|82881940	-2.20884153985433	0.0199718578194693
chr4:82970327|82979006	-3.32779875196451	0.0134755585808727
chr4:83470203|83472288	-2.43056234836448	0.0240433137588619
chr4:87046166|87047594	-5.21648756383474	1.47771379292365e-07
chr4:87195324|87195690	-2.24877138066719	0.00334947987050071
chr4:94573351|94586444	-2.66889652707205	0.0268684475740952
chr5:103096541|103097781	-4.78668790125196	3.36040139857282e-07
chr5:10415488|10417404	-2.81956257597254	0.00160430218885878
chr5:1057471|1065478	-4.59854226841368	0.00116249997443368
chr5:1060344|1065478	-3.61165748460999	0.0041488790383639
chr5:108798124|108798389	-3.45449521441563	0.0185790945909967
chr5:109713520|109716264	-1.99072122995051	0.0181033756849524
chr5:109713520|109729513	-2.87239133934382	0.000526111623168168
chr5:112985835|113004077	-3.0085433312915	0.0198154088058471
chr5:113001084|113001674	-3.3834777674652	0.0286860277867757
chr5:122019260|122022407	-2.49374115455115	0.0461048332174941
chr5:122801869|122803613	-2.92788591053152	0.0299725863399221
chr5:123545417|123553147	-3.36237718144297	0.00523596055459
chr5:123545417|123557564	-3.11222851191943	9.40248182493864e-05
chr5:131255095|131262938	-3.01582501161128	0.0477930736883417
chr5:131677703|131709272	-3.26862575165919	0.000222766536797741
chr5:132892164|132893118	-2.49642659114745	0.0416866870146778
chr5:133006759|133022906	-3.15568508675168	0.040435416457237
chr5:134157707|134174022	-2.081917090797	0.0213852928390016
chr5:134158455|134174022	-4.00847582529487	0.00407736263779708
chr5:134741063|134744052	-3.42431635574653	0.000221261285987451
chr5:137942875|137943216	-3.94880063076182	0.000148988135998016
chr5:137985257|137988315	-3.05142446423516	0.000120209281999987
chr5:138006990|138011149	-4.28901141161959	0.00558131118740079
chr5:138006990|138011945	-3.23809548755172	0.0170275570189326
chr5:138006990|138021197	-2.52384574419105	0.0401097335909874
chr5:139363759|139364743	-4.30066749498826	1.39246283915818e-05
chr5:139600372|139614966	-3.63293212157028	4.83833023232093e-05
chr5:139600372|139623461	-3.18242739756327	0.00310585053328535
chr5:139614586|139614966	-3.91577200793554	4.53409778432453e-05
chr5:140509637|140510181	-3.30894755857797	0.0317111900943542
chr5:141580744|141583615	-2.84660654949453	0.0230619543847823
chr5:141582312|141583615	-2.91452816039734	0.00138938518861759
chr5:142885298|142932125	-3.97525366501447	0.00142173017581563
chr5:143037196|143057747	-2.497172440287	0.0366255887967438
chr5:143054439|143057747	-1.6322134821107	0.0443452048196853
chr5:143399656|143400852	-2.27358628935371	0.00689787788067864
chr5:146254943|146258593	-3.14050466033659	0.00442114372197484
chr5:1488391|1501603	-3.67898933354003	0.0176009143068271
chr5:151790323|151791062	-3.63753759986796	0.000285852484410409
chr5:154033791|154034967	-3.33099227299829	0.000100925078656
chr5:154865192|154872651	-4.01135513783664	0.018207099691503
chr5:157294783|157296774	-3.67197986502541	0.0140112113141711
chr5:157359005|157361598	-3.63553561817743	0.0019363512788319
chr5:168488602|168494650	-3.35067790233196	0.000140530690872289
chr5:168488602|168497348	-2.66162907380684	0.0235877031291712
chr5:168500591|168502105	-3.02755162971646	0.0351019621313206
chr5:169681744|169684350	-4.48067326976128	0.00263481890665532
chr5:169803058|169840852	-4.77761182675309	0.00432083280568318
chr5:169983068|169996164	-3.44192218978425	0.0405691403184065
chr5:172052929|172061268	-4.36295524471376	0.0104495107311305
chr5:173108624|173112379	-4.16552066061	0.000306218151773018
chr5:176943335|176958154	-2.66741735356165	0.00110437124913092
chr5:176975396|176982623	-4.23642771945398	0.0119591614536606
chr5:179560025|179577136	-4.06153663746107	0.00207110253429065
chr5:179705679|179707190	-3.48599219850882	0.0249312957472918
chr5:179705679|179710065	-3.34177023617772	0.000449384429169028
chr5:179709873|179716294	-2.98795931672581	0.0199257335824071
chr5:180549931|180553471	-2.87702293908596	0.0438575178360122
chr5:31421272|31424471	-2.70099212479375	0.0176639355218038
chr5:31448547|31451640	-2.59802837296055	0.0388831214003322
chr5:32135572|32143880	-2.97347546837384	0.000315013007788949
chr5:36953618|36976402	-3.04192818049344	0.000821214903546435
chr5:36982165|36986301	-2.61820612114205	0.0342385889157873
chr5:38990949|39003622	-3.35757944478837	0.000210352017107155
chr5:39002535|39021136	-5.47676149219875	3.10119751917681e-05
chr5:43161249|43161931	-2.28982802695835	0.0129061081730826
chr5:43675511|43677806	-2.47353300383678	0.00367248682420424
chr5:50274988|50411383	-3.73050880978004	0.000219067590970131
chr5:50399107|50411383	-2.45382216647963	0.00155556754796021
chr5:50399107|50428227	-4.0993118010321	0.00459057590725259
chr5:50402286|50411383	-2.93442779071542	0.000285009449743825
chr5:50750151|50763242	-3.07751503483061	0.00116623024170082
chr5:50750151|50797233	-4.85831067303968	0.0039005552919062
chr5:50759643|50763242	-4.5506142534655	0.000383725784783139
chr5:50778069|50797233	-4.22724598702248	1.61711542486467e-05
chr5:53603452|53604895	-2.89866182196712	0.0420906829696462
chr5:5441112|5444326	-2.98320795153368	0.0498856215481021
chr5:55274614|55281515	-3.24740331158683	0.0167542740936548
chr5:55960402|55968396	-3.37239908263007	0.0290957759004805
chr5:55963352|55968396	-3.45928345500293	0.0487222144053098
chr5:56856600|56865977	-4.80179980897943	0.00418705607058342
chr5:56864734|56865977	-3.9126336183278	4.23734424804026e-06
chr5:57230846|57231321	-2.50769492681194	0.0306144570914521
chr5:57246300|57251141	-2.4211235684241	0.00291037663844693
chr5:61472681|61473037	-1.97875743342461	0.0243220100212641
chr5:61472681|61494410	-2.87126556639623	0.030161783321099
chr5:62550367|62561257	5.10537902104646	0.0367648746561775
chr5:64788951|64804386	-3.75080224731817	0.00402434424848363
chr5:65567513|65572286	-3.69904959355871	1.62855266826078e-05
chr5:65680494|65685472	-5.23971721705721	0.000153068240321334
chr5:65988635|65994864	-2.90734665069518	0.000374480475097285
chr5:65988635|66014725	-2.1408075172258	0.0321445250633986
chr5:66012049|66014725	-4.83323183866471	2.11260018885485e-06
chr5:66021322|66054951	-3.2904639760964	0.0243753046098367
chr5:66053406|66054951	-2.8243135517491	0.000776621384847928
chr5:6623214|6625669	-4.36008587263319	0.000709693830208548
chr5:69355649|69355953	-3.36788804385741	0.0216315155132467
chr5:72861808|72865729	-2.13517097935784	0.0227400236196282
chr5:73074742|73077493	-2.85954388558356	0.00116844777641405
chr5:74715510|74716673	-3.3614550532526	0.00363514437625723
chr5:75547010|75552591	-4.28832966513254	0.0113140448119175
chr5:76697987|76701213	-5.62449748481862	0.000280191811879624
chr5:77046347|77048272	-3.33954432839513	0.00297007232190681
chr5:77046347|77048987	-3.92346815068568	0.000300831250927267
chr5:79618647|79620083	-4.54916834560301	0.000117683977860027
chr5:79619612|79623489	-3.46165737842432	0.00710588346056732
chr5:79656958|79669028	-4.86346319990708	0.000151332067961242
chr5:80146090|80147284	-6.46847695077824	2.62893413489204e-08
chr5:83537007|83542268	-3.91519849531682	0.000366529782820646
chr5:94643273|94654752	-2.93629847559807	0.000798823346570495
chr5:97013648|97028612	-5.235906460079	0.00184247387731916
chr6:100766565|100767345	-5.81499061537792	0.000123135394607846
chr6:100798713|100805880	-2.98776753952813	0.00145898636306293
chr6:104744160|104750472	-2.48374869258001	0.0220658069466652
chr6:10702369|10702639	-5.27653744999896	0.0017357039871305
chr6:10703405|10704844	-2.32764829863847	0.0455307542307131
chr6:107744949|107772386	-4.84828309139001	0.000862258073235474
chr6:109475399|109476930	-3.4181028983672	0.00907371226537942
chr6:111262257|111263946	-2.75049652355098	0.00271977135034554
chr6:111405470|111472140	-3.16056278338737	0.0163403864903863
chr6:116689320|116692392	-3.83058538239608	3.74545803251258e-06
chr6:116689320|116705160	-2.39746953930833	0.0179802002001546
chr6:116692055|116726622	-2.8195429477054	0.0254832662957801
chr6:116698704|116705160	-2.76324846134988	0.00070503569367295
chr6:118448404|118449870	-5.55874327096063	6.96521948532056e-07
chr6:127812883|127813931	-4.62857834278671	0.00106673080858985
chr6:127855030|127901081	-4.74703186681259	0.00103357615197399
chr6:130154825|130184623	-6.20119502112738	2.06287416022088e-05
chr6:130175841|130184623	-6.53318081547644	3.37588744136996e-06
chr6:130184103|130184620	-4.38551656113125	0.0101948618674309
chr6:130184103|130184623	-7.26031923802943	9.3902891374835e-11
chr6:13579451|13584225	-2.88813700515999	0.000455081039966136
chr6:13632370|13644729	-2.88404658569917	0.000555318296534836
chr6:13639563|13644729	-2.29417499777002	0.00724736364840861
chr6:136694140|136698682	-3.05353556746973	0.0150995938110656
chr6:137871213|137871522	-4.77789546620537	0.000301871529090669
chr6:144510944|144523188	-4.0982850097817	0.00778548310556499
chr6:144537582|144539443	-2.93153548608118	0.00041294134137015
chr6:144537582|144542870	-3.61876969985094	0.000455459500332713
chr6:144781922|144803147	-2.2666368969302	0.0166684823264515
chr6:145864388|145894977	-3.78706367584842	0.00333374698295387
chr6:145888020|145894977	-3.22875553877937	0.00108061579574776
chr6:147205971|147239270	-2.11539589239466	0.0266379559136424
chr6:149342685|149370099	-2.85840199318832	0.0330139151932352
chr6:149369909|149379518	-4.55381315735714	1.52259204958236e-05
chr6:149512155|149517450	-3.60856651114322	0.0101277232841258
chr6:149572285|149572603	-3.43723359949433	0.0266763595958722
chr6:149771162|149773169	-3.35331728467013	0.0005260278493816
chr6:154787861|154795139	-3.45928345500293	0.0487222144053098
chr6:155176816|155183500	5.23873986459128	0.0290033864819139
chr6:158312051|158314268	-2.33449115316096	0.0239521846271932
chr6:158573420|158589782	-1.98304477226134	0.0264961769065181
chr6:158580940|158589782	-2.36263307012395	0.00299773783641865
chr6:158583954|158585425	-4.28832966513254	0.0113140448119175
chr6:158707230|158725637	-3.26459572266346	0.0186472513024312
chr6:167022409|167033971	-2.77826935204404	0.014891906514483
chr6:170317370|170323259	-3.38572450106332	0.0209538013827093
chr6:17665239|17669546	-3.76387671717789	0.00544295074879975
chr6:17674905|17675770	-3.70280595746644	0.00633837000261394
chr6:18212488|18213781	-3.77330232195616	0.0014219692025766
chr6:20546346|20548705	-4.24499153978277	0.000547313554813338
chr6:24865301|24869147	-4.90553924398336	0.00365465690405799
chr6:2835856|2836250	-2.98645618961233	0.0490419034979663
chr6:30650994|30651466	-2.77017095451719	0.00190790126185511
chr6:3076764|3077935	-2.31168838586588	0.0194856443346695
chr6:3085259|3104315	-4.58154895662394	0.00226116298422971
chr6:31271599|31356442	5.54439813250252	0.0167696574712422
chr6:32519370|32580856	10.6469120556864	0.00296980908941652
chr6:32661967|32757883	6.34397662474799	0.00264944857559651
chr6:34606555|34606904	-3.52506466353768	0.00190604379957304
chr6:35312214|35312772	-3.07864577662804	0.0214191949370224
chr6:35312302|35312772	-2.86461020620258	0.00092862341907753
chr6:36515338|36521817	-4.86304350287596	0.00386693610775797
chr6:36515338|36525642	-4.34037647157294	0.0106908873440219
chr6:36515338|36540207	-4.33987416927171	0.00345202055400026
chr6:36524341|36525642	-4.38111086785794	0.00467512177140243
chr6:36524341|36540204	-5.64430970398239	1.77693103211784e-05
chr6:36524341|36540207	-7.27893454316191	9.75860834195362e-09
chr6:42603588|42606651	-3.02468912131804	0.034577000234518
chr6:43055545|43056445	-3.26241045178433	0.00424751960348538
chr6:45491941|45512407	-5.57030835147298	0.000326231563846998
chr6:47503280|47504758	-2.23797207037268	0.0410020069034258
chr6:53071057|53076543	-4.73769810209958	2.26459034125134e-05
chr6:57050774|57055797	-6.83939445036012	3.78172387714724e-07
chr6:57152221|57161152	-3.61919210329988	0.0151095893400704
chr6:63646527|63646795	-2.63767103978843	0.0360974396346997
chr6:7303550|7310029	-5.44673175123501	3.71513218632955e-07
chr6:73466209|73466606	-3.5136233359595	0.0034701846021186
chr6:75621532|75634811	-2.88883989254132	0.0319182323423081
chr6:75647731|75659407	-4.9434840546309	2.23849161703195e-05
chr6:75702645|75703072	-2.5839116882854	0.00163480831151956
chr6:79060478|79060818	-5.06943458879743	4.34611872084063e-06
chr6:82214227|82214829	-2.88084673575481	0.000853292011007285
chr6:83398367|83407901	-5.30481411403441	0.00166987408079861
chr6:85618818|85619417	-3.43289874173509	0.00321301787933826
chr6:87215903|87218731	-3.03262999989191	0.000343742802182723
chr6:87215903|87233527	-2.70542281661035	0.0299837950404506
chr6:89083753|89084643	-3.59469375825268	5.72837958658372e-05
chr6:89751431|89753622	-2.26372355093642	0.017239924036755
chr6:89846562|89857199	-2.51125818260736	0.0165493689886044
chr6:89853166|89857199	-4.38551656113125	0.0101948618674309
chr6:89854817|89857199	-4.18064687044377	0.00665678607211432
chr6:90206569|90271941	-4.17513341012848	0.000110958832577231
chr6:90249689|90271941	-7.45192239666721	2.82835610957577e-09
chr6:99412551|99416428	-4.24957721011832	0.000832669019372784
chr7:100023419|100024307	-2.41698643696334	0.0019361801638217
chr7:102227367|102227669	-3.70547911813874	0.000128632073641088
chr7:103025063|103029418	-2.71674696642395	0.028740264837339
chr7:103303842|103304490	-3.06343825046709	0.0131257144675707
chr7:104188251|104204234	-3.28168132462824	0.011835247691065
chr7:105038126|105041023	-2.185664319299	0.0238268147357256
chr7:105090009|105091314	-2.87697874946874	0.0143524590151043
chr7:105142008|105143330	-5.30801839308397	0.00165828258592501
chr7:106097690|106099282	-3.27879221537192	0.0119289394048198
chr7:11061791|11111467	-2.20392487848636	0.0225851916884139
chr7:112286873|112287074	-2.62609158841417	0.00915086885049528
chr7:118185647|118188405	-2.53617336041698	0.0247301607685689
chr7:12224226|12229819	-5.71568431081899	5.52168025149646e-06
chr7:130120749|130122202	-3.13205421458736	0.000264445630737204
chr7:131375424|131399433	-2.54741630205219	0.00563556540273499
chr7:131387120|131399433	-2.8265621089423	0.00617507995165105
chr7:135577796|135593192	4.90589917412906	0.048456825297047
chr7:136020701|136031033	-7.25238974456305	1.29826795757571e-08
chr7:139053451|139054095	-3.14537931551989	0.0291148855292001
chr7:140101951|140111184	-3.30894755857797	0.0317111900943542
chr7:140127442|140129653	-3.25827666988506	0.0238675178149961
chr7:140355668|140358785	-2.19276531187638	0.015194198419463
chr7:140776912|140808995	-3.17287745702836	0.00316457168163151
chr7:149018992|149021147	-2.15127362839559	0.0269743420727408
chr7:152249876|152250966	-2.55650942522042	0.0389584050520989
chr7:152309966|152315338	-1.84983606081169	0.030167447977609
chr7:152309966|152358675	-2.97708953815825	0.0417925607195197
chr7:155665175|155680908	-2.07477141030015	0.0140340258269875
chr7:155672867|155680908	-2.58320701082444	0.000956726923230835
chr7:156826605|156836885	-2.91478495097859	0.00091659917040364
chr7:157223254|157225539	-3.52774290743941	0.000517084108647579
chr7:158759486|158764853	-3.38116169590557	2.84194991399555e-05
chr7:158759486|158773396	-6.11851549690535	3.54721521751536e-05
chr7:158773341|158799072	-3.01192184358352	0.00699765089724778
chr7:158788004|158799072	-2.53062561765962	0.00115677540315532
chr7:158869855|158876691	-2.56706722938043	0.033926782064996
chr7:17890363|17897446	-3.02090879354256	0.010742054958878
chr7:1898200|1936897	-6.42538438313521	6.60663144104595e-06
chr7:21477079|21482123	-3.17073856486609	0.0321222732917651
chr7:22960256|22991139	-2.21740098524759	0.011640542438542
chr7:22976210|22984045	-2.40383060480822	0.0367079018639986
chr7:23185070|23185298	-2.9742750687201	0.0362643044035744
chr7:23611171|23611553	-2.65717153462899	0.000706795381728063
chr7:2437804|2443746	-4.86854875935793	0.00383608325139054
chr7:24623666|24650712	-2.30934856635731	0.0183334420665245
chr7:24623666|24668660	-2.18053356789054	0.0172487958344359
chr7:24623666|24680520	-3.54066380209959	0.01591645045253
chr7:2524695|2526921	-3.12545482967967	0.00347485159015841
chr7:27629371|27632445	-3.80301029925133	0.000136538825366255
chr7:27629371|27649633	-3.27460686137659	0.00022616681946889
chr7:27785163|27785489	-4.35668676769054	4.50634372547182e-06
chr7:27785163|27800090	-2.79220698763374	0.0136775063359896
chr7:30621393|30622462	-2.97757957176514	0.00987334228913178
chr7:32874707|32875157	-3.23524418165015	0.0288824555479348
chr7:33351219|33388144	-3.56984960701452	0.034771952125839
chr7:33357855|33388144	-4.32062776568785	0.000348582167775138
chr7:34966894|34973605	-4.85831067303968	0.0039005552919062
chr7:35667434|35673278	-1.85562248828605	0.0314732743294784
chr7:39997494|40002031	-4.29314835243221	0.00553227049946472
chr7:43986192|43986677	-5.12587772364335	0.000283668430306389
chr7:44840899|44843354	-2.44075150612001	0.0373662153054034
chr7:45648670|45662214	5.45004706547096	0.0199894239658985
chr7:50319048|50327757	-4.50274938549044	1.68448790766207e-07
chr7:50319048|50368065	-2.83633202254944	0.0452869335382972
chr7:56083278|56083715	-5.51722670319932	0.00037542585739584
chr7:5901657|5910116	-3.38805613604291	0.00366263675341744
chr7:64336259|64336982	-3.38919864108455	0.00241094143591755
chr7:65979399|65980409	-5.97796678302123	5.777770077674e-05
chr7:66127704|66134374	-2.50049127686813	0.001733549469207
chr7:66712167|66712613	-3.45338339609825	0.0260763021286795
chr7:66991137|66994341	-4.56843282020653	4.13656830234733e-05
chr7:677229|711527	4.98303391012027	0.0434845563771152
chr7:6814764|6822364	-2.38844454076553	0.0133696395337805
chr7:6814764|6823360	5.29826097766772	0.0269970749677244
chr7:7234303|7243750	-3.11819078012876	0.0304946676222384
chr7:72830692|72831798	-6.04803622126585	6.99990698338174e-07
chr7:72830751|72831798	-5.59167901575306	0.000308996926616366
chr7:73686636|73687095	-2.20901819398293	0.0136935496342474
chr7:77387360|77406105	-5.30481411403441	0.00166987408079861
chr7:77396982|77406105	-5.27653744999896	0.0017357039871305
chr7:77571078|77600806	-3.37858157305633	0.0289327468318642
chr7:77749424|77750064	-4.34037647157294	0.0106908873440219
chr7:87964634|87978412	-2.97626965464595	0.00220673422021977
chr7:90726567|90726812	-2.63736726982015	0.0359396654973801
chr7:92225720|92226682	-4.08419771831392	0.00798987191664841
chr7:92294889|92307656	-3.32906913655243	0.000302525146320806
chr7:92294889|92327900	-1.92973303234956	0.0161104155357234
chr7:93291703|93297243	-4.29200970746679	0.00222177059286846
chr7:96277196|96296951	-3.30471658049641	0.0238177441751543
chr7:99390893|99391253	-3.49376118149266	0.00626266346001452
chr7:99493040|99494631	-2.02137100887656	0.0270396296688959
chr7:99908582|99909660	-3.42701654651954	0.0138434216635267
chr8:100527845|100529860	-4.02433527190375	0.00548376535081454
chr8:102360071|102361626	-2.20358862531686	0.0171109001657144
chr8:103404776|103407784	-3.4622445326059	0.00179003498528458
chr8:103430612|103435790	-2.90560879081119	0.0281845096806332
chr8:106679210|106684359	-5.67316027746823	0.000245987987404895
chr8:108449823|108450492	-3.76982472600822	0.00075019581160358
chr8:108449823|108455930	-2.17344712208994	0.0244747912331867
chr8:116655856|116658980	-3.21628517418793	0.0276290001029068
chr8:123077111|123084340	-5.09818535625113	0.00031099951962201
chr8:130152736|130180880	-1.753042266131	0.0313036340890687
chr8:131940499|131946633	-4.00523583829201	3.30670561038107e-05
chr8:132722040|132757294	-4.11870186258874	9.84459305073829e-05
chr8:134812610|134813169	-3.09651962243777	0.00311909376038039
chr8:140585119|140605914	-3.2726845323174	0.0200297594160924
chr8:140864312|140890769	-3.19333808954242	0.00937497251041253
chr8:141151619|141155989	-3.45928345500293	0.0487222144053098
chr8:143689204|143690123	-5.82552768691546	0.000119519183192568
chr8:144880365|144882836	-3.40468022923951	0.0278572416114854
chr8:17265907|17268956	-4.84828309139001	0.000862258073235474
chr8:17963101|17967170	-5.30801839308397	0.00165828258592501
chr8:17989859|17993619	-5.30481411403441	0.00166987408079861
chr8:18011237|18011827	-2.50593392576657	0.00638786901216131
chr8:22474954|22475624	-3.05395047555154	0.000668114886764199
chr8:27294080|27294310	-2.73200504682858	0.00197302807264887
chr8:28155942|28162078	-3.26536510842497	0.00020723840005046
chr8:30101898|30104486	-4.20230416159687	1.04530662488012e-06
chr8:30101898|30106843	-3.04665642423921	0.0349839229285901
chr8:37740365|37741818	-3.33007921225075	0.0308218255313688
chr8:37765526|37766355	-3.14900696650344	8.15317878587718e-05
chr8:37862737|37877551	-3.00759141467913	0.0476579490411895
chr8:37877109|37877551	-2.04520315686883	0.0202963628930296
chr8:38114192|38121149	-3.5761731410222	0.00451858739643688
chr8:38788704|38820635	-4.11625280535286	0.00301320027528337
chr8:38943789|38946221	-3.53508786566553	0.00197722164318433
chr8:42048378|42049707	-4.61207699759679	6.44064785770221e-07
chr8:42325970|42329214	-3.34828809282877	0.000162327265949639
chr8:42354425|42371662	-2.95106330346137	0.0278201246376556
chr8:42957094|42964474	-3.85809224119311	0.000152499339383101
chr8:43059092|43064215	-2.54069915275131	0.00239013250144439
chr8:47284028|47294030	-2.75478788658618	0.00322456595951766
chr8:47394978|47407961	-3.83876909456855	0.00253817314566477
chr8:47396376|47407961	-3.11186908239293	0.00045345641919601
chr8:47953620|47957431	-2.42016536860003	0.0308953961694109
chr8:51845661|51861246	-2.88051429201846	0.0418221053635006
chr8:51860845|51861246	-4.09639052501503	8.35846387658229e-07
chr8:51860861|51861246	-3.48216307782079	0.00187514112054155
chr8:60794986|60801593	-2.18639443421769	0.0236414137947703
chr8:66572482|66573506	-7.10359316790184	3.89960197458985e-08
chr8:66572482|66593194	-6.11851549690535	3.54721521751536e-05
chr8:66572482|66602523	-4.34553339975246	0.00502235783745808
chr8:66592440|66602523	-5.1616993531444	0.000119393361581753
chr8:66601698|66602523	-2.65492970323455	0.00665991907596568
chr8:668598|674047	-3.615598193535	0.000156087996823444
chr8:67105905|67116122	-2.98884151146558	0.0074661932412274
chr8:67118248|67137603	-4.12238924739524	3.91982232659639e-05
chr8:67131951|67137603	-3.14019353746086	0.00185291626247664
chr8:67251299|67259926	-3.4599344526621	0.00141988942900079
chr8:67266006|67277457	-2.86749229982285	0.0344456291171026
chr8:67299209|67302466	-2.40947223250096	0.0454846092857575
chr8:70159505|70162854	-3.02296772415834	0.000362149096979868
chr8:70213903|70216764	-3.52699864240103	3.10548710381845e-05
chr8:70594506|70598255	-4.26530858915144	0.00238284021672407
chr8:73673107|73688813	-1.95949929070476	0.0183355690734134
chr8:73673107|73739868	-2.42899041592639	0.0471278447226124
chr8:80499494|80500382	-6.63503693702225	1.99112892351249e-06
chr8:81029996|81048864	-4.08574788808408	0.00226522669686086
chr8:86402019|86402203	-3.21914897877173	0.0182743334196837
chr8:8933853|8935790	-6.21810316055174	1.93766588212281e-05
chr8:8991548|8994254	-6.14164428607817	3.25591913724371e-05
chr8:94537103|94538346	-4.95866972215164	0.000423152676797244
chr8:96680443|96682076	-4.54418742831781	0.00166752503321024
chr8:97713662|97723035	-2.85410552742407	0.0438864852107764
chr8:98706467|98707311	-4.30636683843223	1.72616279701629e-05
chr8:99274198|99275254	-2.59331315310254	0.0208724746435398
chr9:100052417|100060172	-3.10257413611421	0.0157865919289121
chr9:109106508|109108570	-2.52639639848274	0.00166259255317076
chr9:110136127|110138539	5.64250409264134	0.0138807927718151
chr9:110972073|110973558	-2.53956641481654	0.00998960078397591
chr9:112080074|112098662	-4.90091406161063	0.0036864714649098
chr9:112250929|112252788	-2.41731245121978	0.030701492621926
chr9:121161856|121166180	-4.29131317398453	7.72257209002596e-07
chr9:121171159|121171548	-5.70423391101316	3.84635735752588e-06
chr9:122855184|122855878	-5.32492762488691	0.00162034526405369
chr9:123757703|123769563	-3.45586330482012	0.00225842256135441
chr9:124898549|124900547	-3.84564040461926	0.0224846699336779
chr9:124908377|124912026	-2.20677131981363	0.0210894291458862
chr9:125326416|125330218	-3.17201648162181	0.0396073523798718
chr9:125337018|125337591	-2.07602323417745	0.00973847020875491
chr9:125657651|125672643	-3.22770084655983	0.00134405431560968
chr9:131436620|131439061	-2.82430456217694	0.00137792433779037
chr9:131506114|131506453	-4.40448285695213	6.1281827219016e-07
chr9:133412299|133412921	-2.60666929608505	0.00780482835435038
chr9:134482224|134482884	-5.83151902280658	0.000118234750160073
chr9:137790848|137818138	-4.11948472619261	0.00433916550429928
chr9:137811461|137818138	-4.03627791042086	0.00206756494213408
chr9:14639896|14662326	-3.45354513899743	0.049327513435072
chr9:19288596|19300331	-3.42671914602097	0.0194934941376739
chr9:20413721|20414425	-3.90130573400935	0.00403027458916935
chr9:20819796|20823115	-2.41219714666624	0.0127950003605985
chr9:26861066|26884885	-3.7308429437902	0.00304487104607171
chr9:33029885|33030667	-5.16643840852947	0.00203026720511139
chr9:33944365|33956146	-2.85094966100661	0.0253364710913853
chr9:33948374|33956146	-2.73814774956656	0.00446241915780748
chr9:33960826|33973237	-2.60544168191748	0.00604939217919745
chr9:33960826|33996333	-3.3950039821147	0.0222425002090247
chr9:33971651|33973237	-1.93525868500961	0.0157769210402787
chr9:36197551|36204179	-4.31791113958808	0.0109528276775588
chr9:36352742|36353331	-3.84310612482548	0.0026443595210976
chr9:37126312|37126942	-3.11234948531134	0.000146732422488189
chr9:37126312|37147445	-3.6343182628051	2.62660750912191e-05
chr9:37424845|37426654	-2.04548492094095	0.0204269164917167
chr9:4823548|4833228	-3.4688098281706	0.00145547811036743
chr9:4860125|4860901	4.98071089607429	0.0434001713465215
chr9:5954016|5988545	-3.67197986502541	0.0140112113141711
chr9:5968019|5988545	-3.12028770470517	0.000870380487577651
chr9:6420912|6421142	-4.90091406161063	0.0036864714649098
chr9:6420912|6434173	-2.84270638274697	0.00266169789026248
chr9:70277310|70286271	-3.22700281057824	0.0271881831728867
chr9:71740063|71740232	-3.67734827159123	0.000460311317819266
chr9:74996447|75017448	-3.29908880147498	0.00100978494539036
chr9:75016268|75017448	-2.9583864804976	0.00113039633057184
chr9:77794463|77797648	-4.81938674907795	6.71789909695579e-06
chr9:77794463|77815770	-4.33327008311101	0.0108006428651949
chr9:83661777|83669327	-4.75436849438828	2.04603218073685e-05
chr9:83678441|83683066	-2.43055036426693	0.0352613536545141
chr9:83678441|83686155	-3.20981971618575	0.000345146878515882
chr9:83679775|83683066	-3.06389788841884	0.0231970162223482
chr9:83679775|83686155	-3.28213218226946	0.000259711870659106
chr9:83682951|83686155	-3.72787773163705	2.21561460222778e-05
chr9:83768818|83788678	-2.56789831694698	0.0381235097467337
chr9:85575315|85579096	-4.33327008311101	0.0108006428651949
chr9:85596362|85633374	-3.27285844984415	0.0030422781989416
chr9:85618983|85633374	-3.51832145648823	3.67562807855744e-05
chr9:85669485|85681335	-4.23642771945398	0.0119591614536606
chr9:85669485|85712566	-6.6298809640447	7.60205800206056e-09
chr9:85677436|85712566	-4.71069630482395	5.2704283519554e-05
chr9:85692689|85712566	-4.95799171643345	2.86813921244927e-06
chr9:86303086|86304947	-2.85419452583555	0.00303015048415585
chr9:86305192|86310017	-2.7175036465061	0.000765375595501599
chr9:89328660|89328886	-3.59946011120236	0.00474956134737357
chr9:89455888|89475550	-2.64922533851222	0.0369892814142861
chr9:92855811|92856318	-3.77160063513417	0.00734488981421186
chr9:93471141|93476338	-3.84555397134383	1.14795348011148e-05
chr9:93471141|93498886	-3.84132341876246	1.63293051548584e-05
chr9:95978061|96004701	-3.05209858407477	0.000818989695803952
chr9:96458379|96458541	-4.33241899899925	9.14955738180296e-06
chr9:96458379|96465778	-3.68334919215357	0.0174646351679847
chr9:96458379|96471094	-6.18180372134485	2.2176118293576e-05
chrX:101041317|101042312	-3.68288757310416	6.05442546688616e-05
chrX:118542725|118546116	-4.10228854082616	1.42599521537681e-05
chrX:118584735|118590302	-3.99619313509411	6.0688227156302e-06
chrX:118654602|118654961	-3.30743834258117	7.48366135546289e-05
chrX:119629318|119629508	-2.50106678612468	0.0336802162754153
chrX:119930016|119932216	-2.88396685517602	0.04654527734523
chrX:1285778|1290509	-4.29325076156054	4.28297249949206e-05
chrX:132281095|132283032	6.04787475537266	0.00563703754009868
chrX:13666317|13680598	-2.67244257826026	0.00643035189746699
chrX:139814878|139826823	-3.56920709049838	0.00461432813456504
chrX:148651999|148662768	5.67791456109452	0.0130493668774083
chrX:148661908|148662768	2.53344211900772	0.00398415595304505
chrX:150736595|150737448	-3.21848104750938	0.00440113680444174
chrX:1593444|1595532	-6.49604221280722	1.37550871774568e-09
chrX:20188497|20204103	-3.12349251020584	0.0422079134174682
chrX:24172715|24179770	-2.00996256630444	0.027757325693015
chrX:3817545|3818500	-5.56959904841825	0.000326098971936519
chrX:51327721|51357027	-3.38440105932512	6.99750823946086e-05
chrX:51895053|51897271	-3.2550693825779	0.00874094666854225
chrX:53403566|53403893	-2.28613683797497	0.00893144897320606
chrX:53614534|53614745	-2.94599121482606	0.00543786039294605
chrX:53614534|53615835	-2.56683023748805	0.00279748069964975
chrX:54636235|54636427	-3.41243492938619	0.00225061000895232
chrX:65075474|65113813	-2.69819732512252	0.00396851855491332
chrX:68518770|68521497	-3.34555850629039	0.014975720488333
chrX:75098942|75114834	-4.43089537877467	0.00971258743371333
chrX:77652114|77656653	-3.0548791747133	0.028321396901732
chrX:78014662|78020398	-3.92986738648045	0.000105957023782875
chrX:80791854|80793772	-3.91845706244218	7.00470200799431e-05
chrX:85067127|85074391	-2.81186493099886	0.00605566251365629
chrX:96735758|96738762	-3.45928345500293	0.0487222144053098
chrY:12702010|12709543	-5.58864374586431	0.000309018754284132
chrY:12909360|12913062	-6.49293498686197	4.88918818871782e-06
chrY:12912963|12914649	-5.90572255691337	9.51435763844469e-05
chrY:19587210|19590772	-5.92698936140705	8.96084295746567e-05
chrY:2953909|2961646	-4.47357187612295	1.65014603966389e-06
chrY:2961074|2961646	-4.67314594771398	0.00116047569955236
chrY:3079284|3102194	-7.09788319751758	5.54077350688061e-08
chrY:7341115|7371889	-3.60763692300162	0.0332462224989623
chr1:100424222|100442996.1	-4.68775177515008	2.06683752838087e-06
chr1:100439932|100468094.1	-3.72982008591927	0.0129052106674116
chr1:100494818|100499262.1	-3.60157253551446	0.00800384050787179
chr1:100906852|100921841.1	-2.70182567517567	0.0297706728315593
chr1:103565435|103575540.1	-2.32315499460594	0.0203603140637273
chr1:108148279|108161293.1	-3.70104431751272	0.000312269416946192
chr1:108752257|108760085.1	-3.67904681527683	0.00866287277609001
chr1:108782422|108794907	-3.66522399716215	0.0291369541670712
chr1:110891392|110892533.1	-4.78504630243889	8.4957485641305e-07
chr1:111147642|111161296.1	-3.27299443177762	0.00127344687789278
chr1:112610841|112616895.1	-3.06014576566236	0.0459259634678029
chr1:112653598|112659779.1	-2.51682453248132	0.00322969932976109
chr1:112653598|112667145.1	-3.68138262880067	0.00377075831761952
chr1:113829592|113834439.1	-2.96406601552555	0.000474878571546546
chr1:113833111|113855049.1	-5.64891085117469	0.000262548017497317
chr1:113834910|113855049.1	-2.93287555749238	0.00314011477556724
chr1:113848540|113855049.1	-4.33013260446943	8.61493198247893e-06
chr1:114463104|114464388.1	-1.92749882803123	0.0288537964579992
chr1:117402186|117405645.1	-3.7231437636025	1.11534262915141e-05
chr1:117402186|117414831.1	-2.68148484760095	0.000970283850720203
chr1:117402186|117420649.1	-2.44561946477621	0.00161718608720462
chr1:117402186|117442325.1	-2.44243151575193	0.00224380698787567
chr1:1223244|1223968.1	-2.91424013891186	0.000239365096105503
chr1:13715541|13749487.1	-3.81760870620653	0.0110123396735291
chr1:13731000|13742157.1	-3.16037578350685	0.00159198670770125
chr1:145839890|145841071.1	-3.37409919791032	0.0147005425555458
chr1:145839890|145842477.1	-3.12357843930537	0.00153092573242948
chr1:150230571|150231926.1	-3.21433244129448	0.00331574378943812
chr1:150334935|150335241.1	-3.82105918116736	0.0109141854544177
chr1:150440923|150446401.1	-3.41303992453194	0.00416262667788834
chr1:151024611|151025673.1	-3.70167153074505	0.000356162537903136
chr1:151024611|151027327.1	-4.19508930547278	0.00266653712457598
chr1:151027233|151028944.1	-3.22442311882362	0.0130380933775009
chr1:151088190|151118139.1	-3.22067205075744	0.036513715986827
chr1:151117392|151118139.1	-3.21713776063505	0.0223424130437754
chr1:151166934|151167414.1	-4.57411880562199	5.67702430405514e-07
chr1:151172268|151173615	-4.45609433906912	0.00279501753642377
chr1:151638888|151639119.1	-2.41537619578217	0.00817328854389377
chr1:154172908|154173201.1	-3.40271766966694	0.000164751326359744
chr1:154234591|154235291.1	-3.19779295743929	0.00488258497406549
chr1:154251041|154251653.1	-2.64684331368298	0.0262100709435599
chr1:15534237|15536814.1	-3.00894226991472	0.00861726060012224
chr1:155370504|155370983.1	-2.60393908621985	0.046743126124261
chr1:155438327|155459898.1	-1.98649298022987	0.0158221558513784
chr1:155521100|155521618.1	-2.78945621606769	0.00230661539752583
chr1:155674685|155675096	-3.23690446311852	0.0363018693788833
chr1:155675010|155679512.1	-2.95976679205471	0.00068824389570319
chr1:155675010|155680456.1	-3.63255072131401	0.00622424020352477
chr1:155676548|155679512.1	-3.42275187653615	5.73089589112441e-05
chr1:155725382|155726019.1	-3.25047517299313	0.000148773441341697
chr1:155853276|155853806.1	-3.10859994593261	0.000115143283460332
chr1:156333547|156334918.1	-3.3961443834748	0.000453765330843208
chr1:15638307|15643650.1	-3.39435154355547	0.000842199121909911
chr1:15717893|15721388.1	-2.16171587716187	0.0382802840256184
chr1:161102048|161102375.1	-5.22339301479923	0.00187133110046267
chr1:161846449|161863312.1	-3.01377476189227	0.0473862314889573
chr1:1669664|1734835	-4.58430719735489	0.000141491082590937
chr1:167966629|167975015.1	-2.39234684718893	0.0396304587440344
chr1:169477155|169477757.1	-3.00324623928053	0.0274697658493618
chr1:169978085|170031975.1	-3.05174847808286	0.00114727513875329
chr1:171568247|171575128.1	-3.44335580457368	0.000327991787141322
chr1:172551512|172557794.1	-3.42492250382346	0.00428790254613842
chr1:172555869|172557794.1	-5.07997748397704	0.000227726926876748
chr1:173992755|173993135.1	-1.99591315906749	0.0484226025977815
chr1:174272414|174394145.1	4.89679501676749	0.0492221987083494
chr1:175986943|175989479.1	-4.6443127809913	0.000607264574458586
chr1:176027572|176046324.1	-3.08679692166347	0.0321722369103306
chr1:176116624|176136547.1	-2.66110776367825	0.032105938467618
chr1:179131311|179133374.1	-2.7882613751341	0.0193895189212133
chr1:179342114|179343635.1	-3.36397967957323	0.0214913812940031
chr1:179347600|179350431.1	-3.56389684752964	0.00747859354880166
chr1:180003174|180006567.1	-1.78167101941793	0.0453611152536455
chr1:180062220|180065272	-3.22890533631524	0.0128400378732451
chr1:180397516|180413471.1	-2.80056415314977	0.0194026274252525
chr1:185214507|185231708.1	-2.82663602228173	0.0176372057006003
chr1:186318447|186318828.1	-4.05622807098312	0.00209366007849634
chr1:194156137|194158168	4.91825933829338	0.0468932430031917
chr1:197583152|197611976.1	-4.60868990648825	0.00210855222439634
chr1:197642711|197658369.1	-4.02891705334819	3.35788587535964e-05
chr1:198232553|198264235.1	-3.84891581884171	0.0103760949443481
chr1:205616478|205623891.1	-1.88002332967065	0.0147408158816205
chr1:205771472|205773224.1	-4.85831067303968	0.0039005552919062
chr1:20757166|20773610.1	-2.65870867340336	0.001242301660785
chr1:20765377|20773610.1	-2.38943305187589	0.0493932608786202
chr1:20770930|20773610.1	-4.31667265928278	1.33960273614226e-06
chr1:207815929|207817414.1	-2.84871966882957	0.0337338199412897
chr1:20969474|20981227.1	-2.58292002020268	0.0228299013696867
chr1:211353239|211354467.1	-2.09442495549992	0.0105582288163891
chr1:211778918|211793190.1	-2.39657495298062	0.00641934643403004
chr1:212863725|212885396.1	-2.95445557131897	0.0276154778935215
chr1:213117317|213129889.1	-2.95286647243991	0.0150423444475641
chr1:21715389|21721764.1	-2.67083281694185	0.00724694555624336
chr1:21715389|21724095.1	-3.955083887126	0.0195501519446794
chr1:21721036|21721764.1	-4.88906573016958	0.000383952694623951
chr1:22078429|22086866.1	-3.26518049381774	0.00421424581103405
chr1:22078429|22091501.1	-3.28595748825136	0.00547806426618791
chr1:224952670|225007544.1	5.26665436554943	0.0286756582058065
chr1:2302978|2304585.1	-5.77259214877275	2.35205238848795e-09
chr1:23030469|23044486.1	-4.77761182675309	0.00432083280568318
chr1:23030469|23050520.1	-3.21283909573726	0.000185596182001166
chr1:23030469|23059167.1	-2.34982915327203	0.0472227569773035
chr1:23071225|23072197.1	-3.0721416659961	0.0112737150984669
chr1:230954333|230961303.1	-3.15426031455911	0.000245090488944417
chr1:231537213|231542611.1	-2.40634397334672	0.00648130492496465
chr1:231795242|231818517.1	-3.50352502986576	0.000145607521869637
chr1:231818329|231819150.1	-3.93382740317198	0.0105118892413658
chr1:233090061|233095863.1	-2.48498408008277	0.0127152624496766
chr1:233198939|233218184.1	-3.41279434417562	0.0135123842700305
chr1:233217899|233227371.1	-2.99354290927177	0.00118404757582685
chr1:233227226|233236980	-3.30894755857797	0.0317111900943542
chr1:235335242|235342883.1	-3.72462095730098	0.00817551010544657
chr1:235341708|235342883.1	-5.83901412660847	0.000114910988235207
chr1:235773842|235787373	-2.98140184091648	0.0494007541918212
chr1:235780865|235782087.1	-4.75621503343156	0.000329734943867919
chr1:235793503|235801097.1	-3.92633925090586	0.0203427053693056
chr1:236803428|236806233.1	-4.34037647157294	0.0106908873440219
chr1:236824119|236826896.1	-3.2767217528652	0.0249564841539487
chr1:23814190|23820593.1	-4.49670297142089	0.000222262033970833
chr1:243304713|243316893.1	-3.73075685133457	0.00810159364565641
chr1:243695591|243843282.1	-3.19534616566302	0.00479839135119845
chr1:244843135|244848856.1	-3.43851924962223	0.00882181237466113
chr1:245002121|245059458	-3.75075040571079	0.0154992538689049
chr1:24514314|24514567.1	-3.82739361718945	3.45094172669667e-06
chr1:24531218|24533254.1	-2.46339966406802	0.0432610944065491
chr1:246591512|246591941.1	-3.58606079774452	0.000201737738251096
chr1:246621429|246634587.1	-3.20702128593654	0.0270374002356823
chr1:246627356|246631924.1	-2.4981529110938	0.0408081125913001
chr1:246631359|246631924.1	-4.12073659183211	0.00745588466116367
chr1:247157000|247159813.1	-1.98240715918509	0.0493573336822943
chr1:247159006|247159813.1	-2.47681255411784	0.0103089983500781
chr1:25242374|25243633.1	-4.75932839234561	5.96117772260612e-05
chr1:26446316|26447660.1	-3.13532735429386	0.0004141323487496
chr1:26453609|26463433	-2.91150280927704	0.0219725071339556
chr1:26942660|26943065.1	-3.35234321911565	0.000109417909968463
chr1:28010947|28017239.1	-3.97356782184953	0.0190912822378065
chr1:28473554|28476291.1	-5.60715215617676	0.000295910707278207
chr1:28742403|28743986.1	5.08633572021083	0.0368336385181621
chr1:28987431|28987905.1	-3.33694902055652	0.00827554481662445
chr1:30992390|30995220.1	-2.86650226055665	0.000644101489564098
chr1:31005853|31007102.1	-2.78432139931237	0.0283159529289926
chr1:31337175|31339048.1	-3.04215212199018	0.00553927262726723
chr1:31915895|31919658.1	-1.88096801279762	0.0166928323983727
chr1:32030298|32033334.1	-3.39200781253072	0.0135700396928465
chr1:32224034|32224475.1	-4.23642771945398	0.0119591614536606
chr1:32279671|32280210.1	-3.37234529864636	6.30551869541916e-05
chr1:32631827|32634792.1	-2.70823971348231	0.00169871970354857
chr1:32948222|32949774.1	-3.79932484848821	3.34078962326669e-05
chr1:33294937|33295305.1	-2.9837635609654	0.000680853762687739
chr1:35358925|35361789.1	-2.68672766077122	0.000811089701220436
chr1:36361221|36362656.1	-2.57921132291225	0.00757833443170664
chr1:39439274|39439500.1	-3.11160211078254	0.0109845960765211
chr1:39853970|39857417.1	-4.24690917969247	0.000392887986296538
chr1:41070595|41075451.1	-2.80954127308717	0.000513902651256179
chr1:42265115|42278672.1	-3.25335508126793	0.000572746484302192
chr1:42265115|42323827.1	-3.20062582618285	0.0265369735513356
chr1:42278348|42311110.1	-3.41601441218183	0.0274879967649526
chr1:42773563|42775479.1	-2.80162517990412	0.0484724260981473
chr1:45640210|45642499.1	-2.57421337487574	0.00207810163998782
chr1:45659028|45661225.1	-4.28543084882806	0.00563466664487488
chr1:50490588|50535457.1	-4.90091406161063	0.0036864714649098
chr1:51461091|51465326.1	-2.09639188274198	0.0333598082509876
[truncated: 4,707 more rows]

## Sheet: DCE_HBZ_vs_CTL
	logFC	PValue
chr1:107683488|107705061	-2.93723713984953	0.0010927022005137
chr1:108885507|108929975	-3.61159420886743	0.0379900994188386
chr1:108939636|108944057	-3.61159420886743	0.0379900994188386
chr1:108981733|108986680	-3.56695702309506	0.0397741406061723
chr1:110347573|110372346	-3.87011418447608	0.0270371129276954
chr1:11121095|11122126	-4.29948723432444	0.00836863421665155
chr1:11124498|11133197	-4.14295904096307	0.0134404418357564
chr1:113825142|113834439	-3.52034540310826	0.0416924404818337
chr1:114719579|114738072	-3.58598764488779	0.0390055858416525
chr1:114725221|114738072	-3.58598764488779	0.0390055858416525
chr1:120419850|120436697	-4.15333472752243	0.0130306907498533
chr1:12275825|12278038	-4.85297351675692	0.00148760664599967
chr1:13715541|13749487	-4.54937900687884	0.00421850301475163
chr1:151202700|151203275	-4.15892215275095	0.0128174002130845
chr1:151658235|151662270	-3.61159420886743	0.0379900994188386
chr1:153811731|153813452	3.90141346360712	0.030021666201893
chr1:155415744|155482449	4.39720736127383	0.00999036502869767
chr1:155438327|155482449	4.09209526502118	0.0204629337373537
chr1:155459797|155482449	4.84634103763819	0.00258125075890912
chr1:155674685|155679512	-3.58867954063299	0.0388990873331266
chr1:155675010|155680456	3.66529693804712	0.0494625118813134
chr1:1564605|1564916	4.38743014017296	0.0102425166234252
chr1:15911101|15916279	3.69651020208697	0.0462878373555831
chr1:160313990|160316354	-3.60758302084939	0.0381464714884003
chr1:161362329|161366304	3.73060075080536	0.0430013349250589
chr1:161802052|161821161	-2.54441718228026	0.0378071909466558
chr1:1655369|1657498	-3.61293023887978	0.0379381069279494
chr1:16632607|16633346	-3.61293023887978	0.0379381069279494
chr1:1668327|1670151	-3.61025766215859	0.0380421576530504
chr1:168369023|168379782	-4.52847191958139	0.00445096536623215
chr1:168378854|168379782	4.71875538101732	0.00386644184866016
chr1:172551512|172570730	-3.0117364604838	1.73826146117122e-06
chr1:172555869|172570730	-1.62652592189081	0.0299742526342327
chr1:174457714|174470539	-3.90948915149542	0.0257809452913833
chr1:1825397|1853297	-3.56695702309506	0.0397741406061723
chr1:184694044|184749592	-3.60758302084939	0.0381464714884003
chr1:19167022|19192540	-3.52034540310826	0.0416924404818337
chr1:195554090|195568995	-4.15613234044154	0.0129235879292462
chr1:197595208|197617759	1.9278319881122	0.0281575179944654
chr1:198232553|198264235	-2.89934975636687	0.0123495697601467
chr1:198277961|198319552	3.91133768693502	0.0294686900147614
chr1:202150311|202152699	-4.15706314302236	0.0128880907280645
chr1:202755271|202764145	-3.58598764488779	0.0390055858416525
chr1:204468870|204469886	-3.10849491612214	0.0227669999714783
chr1:205616478|205623891	-1.06400069653999	0.0425201264808662
chr1:206580935|206612357	-3.61293023887978	0.0379381069279494
chr1:206595718|206612357	-4.12674196326559	0.0140948923169802
chr1:20840856|20865262	-4.71370003827242	0.00249510923481983
chr1:212044660|212047417	-1.6248904040955	0.016460481801329
chr1:214647078|214663780	-4.10831460299363	0.0148642442905827
chr1:215586495|215595471	-3.60758302084939	0.0381464714884003
chr1:21680808|21724095	-3.87360697739095	0.0269251943842689
chr1:21747067|21753119	-4.15613234044154	0.0129235879292462
chr1:220136809|220139139	-3.89219078774411	0.0263285080351345
chr1:22078429|22086866	-3.12645538952638	0.0219097235977804
chr1:222715684|222725555	-3.89103543807787	0.0263649276153312
chr1:224231226|224233289	-3.52034540310826	0.0416924404818337
chr1:227747692|227759485	-2.95379830233448	0.0354830739769518
chr1:228294780|228303938	-4.09352103936288	0.015504310869052
chr1:228394737|228395252	-3.85137110276161	0.0276268699171191
chr1:229486371|229487613	-4.3557907495708	0.00731782891189191
chr1:229518165|229556952	-3.91292850672517	0.0256742939414244
chr1:229541472|229542912	3.99423432567816	0.0245051339383146
chr1:23030469|23050520	-1.66565343411682	0.0418877462990515
chr1:230945389|230961303	2.15553935767885	0.0355402915766933
chr1:232513857|232515608	-3.88987957963917	0.0264013977973182
chr1:233177802|233208689	-4.35173259183838	0.00738677730659502
chr1:233208518|233236980	-2.1645832396924	0.0344026093973447
chr1:233346442|233355011	3.66664216055045	0.0493061977211433
chr1:235219793|235240451	-3.60758302084939	0.0381464714884003
chr1:236168706|236183906	-3.60892059930204	0.0380942816648669
chr1:236571351|236576949	3.8836346651014	0.0310134204120459
chr1:23814190|23820593	-2.44706208244581	0.0249239526371411
chr1:2404044|2410868	-4.15613234044154	0.0129235879292462
chr1:243185779|243225321	-3.58733384623711	0.0389523033922651
chr1:244409485|244422916	-3.60758302084939	0.0381464714884003
chr1:244845247|244848856	-3.81351143166836	0.0288051933707979
chr1:246621429|246634587	4.35206424081294	0.0111604800874915
chr1:246726892|246740301	-3.91292850672517	0.0256742939414244
chr1:247157000|247159813	-1.24170555031122	0.0489463924314456
chr1:26257597|26259802	-1.75423595953226	0.0090408155846205
chr1:29035826|29039426	-1.98350188365608	0.0283185333698082
chr1:32024576|32024839	3.72845592188014	0.0432020250313422
chr1:32324479|32327677	-3.87011418447608	0.0270371129276954
chr1:32592931|32595223	3.70531607434734	0.0454198483899882
chr1:32668225|32672901	-3.88872321242009	0.0264379186371382
chr1:32678463|32679065	-3.61293023887978	0.0379381069279494
chr1:33270487|33281811	-3.56424814253119	0.0398828434474376
chr1:35003968|35015162	-3.87244322227636	0.0269624490111698
chr1:35097317|35110447	-3.89219078774411	0.0263285080351345
chr1:35392212|35399576	-3.61293023887978	0.0379381069279494
chr1:35506612|35507135	3.71499208235904	0.0445101098337529
chr1:35747907|35765326	-3.61025766215859	0.0380421576530504
chr1:37864312|37868614	-2.70117853840818	0.0244333970419584
chr1:39447432|39448763	-3.85137110276161	0.0276268699171191
chr1:40190772|40202614	-1.62809520898204	0.0395440687179687
chr1:41575544|41585318	-2.9940943651568	0.00837438257352457
chr1:42265115|42323827	-3.60758302084939	0.0381464714884003
chr1:43824731|43838311	-3.58733384623711	0.0389523033922651
chr1:43920404|43921638	-3.61159420886743	0.0379900994188386
chr1:44284835|44319744	-4.85006863488429	0.00150233224546452
chr1:44284835|44339322	-2.03592312853699	0.0337271975789866
chr1:44750442|44753833	-3.52034540310826	0.0416924404818337
chr1:45634096|45660377	3.69056957933846	0.0468736682276055
chr1:46562649|46572167	-3.12361916632835	0.0222179200951047
chr1:47260289|47263113	-3.52034540310826	0.0416924404818337
chr1:51236734|51271473	-4.14107037227657	0.0135147015480062
chr1:51400918|51408332	-3.85137110276161	0.0276268699171191
chr1:51745536|51772723	4.25689012074791	0.014238678564845
chr1:51834017|51855388	-3.85371551443705	0.0275557824394835
chr1:52404681|52418104	-2.52804096801842	0.0088196151661985
chr1:52974769|52988136	-3.61293023887978	0.0379381069279494
chr1:55145998|55172520	-3.52034540310826	0.0416924404818337
chr1:5927649|5933329	-2.72512205982234	0.0228295362520414
chr1:59339958|59346398	-3.89219078774411	0.0263285080351345
chr1:59441551|59474202	-3.60758302084939	0.0381464714884003
chr1:5961794|5986232	-3.91178256303496	0.0257097948141339
chr1:6629643|6634193	-3.5437296536934	0.0407229140993177
chr1:66958059|66963160	3.90191088485526	0.0299846038362649
chr1:67395405|67405169	-3.60892059930204	0.0380942816648669
chr1:70173465|70189273	-3.61025766215859	0.0380421576530504
chr1:75745806|75750546	-2.91627518638398	0.00372712527225161
chr1:75803731|75816546	-3.87127895796862	0.0269997551736075
chr1:77565442|77584655	-3.90948915149542	0.0257809452913833
chr1:77717867|77725762	-1.96800383190359	0.0431467760014413
chr1:7777160|7778169	-1.68753286343411	0.047040967404521
chr1:77803270|77815231	-3.58867954063299	0.0388990873331266
chr1:77949155|77967666	-3.59002472747752	0.0388459376329242
chr1:84179177|84214317	-2.17599760489239	0.0124488655849494
chr1:88949091|88969467	-4.15613234044154	0.0129235879292462
chr1:89668161|89688085	-3.81351143166836	0.0288051933707979
chr1:89712709|89714851	-3.60892059930204	0.0380942816648669
chr1:89843638|89933938	-3.90719370757374	0.0258522944504569
chr1:89933067|89936249	-3.58598764488779	0.0390055858416525
chr1:92323445|92345914	-3.58598764488779	0.0390055858416525
chr1:93210802|93217869	-3.90719370757374	0.0258522944504569
chr1:94498602|94506642	-3.52569028312366	0.00561047247731468
chr1:97515726|97549744	-2.34661447953897	0.0349948105130703
chr1:97679095|97721671	-3.61159420886743	0.0379900994188386
chr10:1000677|1007128	-3.91063611130046	0.025745345245486
chr10:100178133|100179247	-3.89334562864789	0.0262921390006889
chr10:100990436|100991010	-3.1060354375693	0.0239945249164758
chr10:101018099|101019217	-3.60758302084939	0.0381464714884003
chr10:101797980|101813606	-2.40055851737588	0.0275832500904159
chr10:103139406|103181328	-3.1270845161421	0.0218729923446483
chr10:110124017|110130486	5.22960051095077	0.000615905847196593
chr10:1103599|1105267	4.05588028858397	0.0219069385852496
chr10:1103602|1105267	-4.65888722480828	0.0029290842757071
chr10:112694877|112697491	3.69002403374889	0.0469512178867323
chr10:119575691|119580538	-3.87127895796862	0.0269997551736075
chr10:122880671|122890853	-4.13917815887937	0.0135893869934983
chr10:124484139|124488575	-2.53545461777319	0.0380800643152876
chr10:124942457|124974398	-4.35254500678302	0.00737293165646446
chr10:125743058|125753845	3.69596646818675	0.0463644212935755
chr10:133476902|133498005	-2.92970829380773	0.0371861855346534
chr10:17684675|17700279	-3.60758302084939	0.0381464714884003
chr10:22588432|22609717	-3.58598764488779	0.0390055858416525
chr10:27181983|27183378	3.91386071956342	0.0293354508670984
chr10:30313891|30337027	-3.56424814253119	0.0398828434474376
chr10:32048464|32050523	-3.58867954063299	0.0388990873331266
chr10:32451592|32474023	2.04030951049797	0.0183889882350584
chr10:32469385|32474023	-5.5012471418684	7.65473409960203e-05
chr10:32469385|32481782	-3.59002472747752	0.0388459376329242
chr10:34331117|34360259	-4.49108677751804	0.00489303086097012
chr10:34516979|34545288	-4.32459118022601	0.00786942626330238
chr10:35029488|35033273	-3.58598764488779	0.0390055858416525
chr10:45648963|45651625	-3.52034540310826	0.0416924404818337
chr10:45939361|45962994	-1.58076258722703	0.0229817846159957
chr10:45975454|45988847	-2.28129456888214	0.00570013649963649
chr10:46202551|46204985	-3.90719370757374	0.0258522944504569
chr10:4830675|4842504	-2.24452581097236	0.00136177052679633
chr10:4830675|4847230	-3.87011418447608	0.0270371129276954
chr10:5699525|5714207	-3.26608194232659	0.0145276185420116
chr10:68422225|68470163	3.66378206173014	0.0496213224779884
chr10:68437011|68446413	4.12301432709956	0.0192958554282886
chr10:68753852|68791341	-4.32459118022601	0.00786942626330238
chr10:68963291|68967203	-5.21249368478969	0.000321335181129928
chr10:68968976|68977688	3.70917706511727	0.0450712007262692
chr10:69359897|69369624	3.66529693804712	0.0494625118813134
chr10:7243558|7285954	-1.19866677470878	0.0407316874442208
chr10:73068846|73074915	-3.85371551443705	0.0275557824394835
chr10:86451967|86461287	-3.5437296536934	0.0407229140993177
chr10:87104682|87187200	-3.91292850672517	0.0256742939414244
chr10:884447|889057	-3.56424814253119	0.0398828434474376
chr10:88893871|88905660	-4.46645061857614	0.00519907889762308
chr10:89751346|89762835	-1.81295295818086	0.0230103196238962
chr10:91992119|92008275	-4.70211347522064	0.00258183583719797
chr10:92008829|92011415	3.66760096054386	0.0492297344447186
chr10:92692368|92695494	-3.56695702309506	0.0397741406061723
chr10:94565598|94568936	-3.52034540310826	0.0416924404818337
chr11:1000432|1003804	-5.72558714590329	1.98122762398909e-05
chr11:107390074|107392895	4.35905771145424	0.0109863501233551
chr11:108135148|108151008	-3.61293023887978	0.0379381069279494
chr11:108272532|108279608	-3.61293023887978	0.0379381069279494
chr11:108327645|108332037	-3.83368355334932	0.0281735741977023
chr11:119284969|119285566	-3.83368355334932	0.0281735741977023
chr11:134184637|134194738	-3.91063611130046	0.025745345245486
chr11:18291442|18292019	2.90094228785039	0.0275484181498697
chr11:18300828|18311451	-3.5437296536934	0.0407229140993177
chr11:20493919|20494254	-3.61293023887978	0.0379381069279494
chr11:2969803|2972279	-3.58598764488779	0.0390055858416525
chr11:32927157|32958086	-4.50144006675014	0.00476678194447144
chr11:33085032|33161369	-3.59002472747752	0.0388459376329242
chr11:34063052|34063363	-3.54236662446207	0.0407784104595832
chr11:34957384|34992379	3.1907311542478	0.0113033799373638
chr11:36393846|36403378	-5.5012471418684	7.65473409960203e-05
chr11:36393846|36419303	-3.60892059930204	0.0380942816648669
chr11:36400997|36403378	-4.5248554956932	0.00449178585508141
chr11:3723157|3753408	-3.81351143166836	0.0288051933707979
chr11:3967552|4059396	-3.60758302084939	0.0381464714884003
chr11:43326507|43335994	-2.07795025631069	0.019964316149721
chr11:43798320|43840064	-4.5248554956932	0.00449178585508141
chr11:46795594|46821268	-3.85371551443705	0.0275557824394835
chr11:57672021|57682543	3.83922317630674	0.033627063259674
chr11:61325611|61330074	3.67140391844153	0.0488414962142876
chr11:61366045|61367998	1.60037645265931	0.0148000654801454
chr11:61366118|61367998	-3.60892059930204	0.0380942816648669
chr11:61806664|61811075	-2.5103599711948	0.041642065355223
chr11:61837778|61840725	-3.61025766215859	0.0380421576530504
chr11:62781894|62782825	2.32278402144869	0.0435668085745417
chr11:63651936|63659252	-3.61159420886743	0.0379900994188386
chr11:65393573|65394425	-3.61025766215859	0.0380421576530504
chr11:65435053|65444063	-3.56560283159053	0.0398284585654871
chr11:65499249|65499423	3.6831043198539	0.0476195601124407
chr11:65500863|65501193	-3.90948915149542	0.0257809452913833
chr11:65500927|65505019	-3.16931953471166	0.0202180160291023
chr11:66648588|66653597	-3.59002472747752	0.0388459376329242
chr11:68347847|68365702	-2.65176227502688	0.0274058310631967
chr11:68423489|68426187	-4.51537414163899	0.00460173469678687
chr11:68804000|68807638	2.89260345938354	0.0281211282727264
chr11:74118228|74133557	-2.98353047642935	0.0333057560431416
chr11:74843350|74851203	-3.91063611130046	0.025745345245486
chr11:75402121|75402446	-3.56424814253119	0.0398828434474376
chr11:76513386|76537950	-3.58598764488779	0.0390055858416525
chr11:77622500|77625818	2.67299131001062	0.0496104913393874
chr11:77624963|77625818	-2.67590472026925	0.00976760247274123
chr11:93696320|93702919	-4.32706780016959	0.00782255795800391
chr11:93788001|93794035	-4.29864687566827	0.00838559079538598
chr11:94485924|94490965	-5.50199822784902	7.62663127407973e-05
chr11:94485928|94490965	-4.34190042246976	0.00755852641014927
chr11:9575888|9577263	-3.87011418447608	0.0270371129276954
chr11:9842625|9850218	-3.54236662446207	0.0407784104595832
chr12:101308185|101319635	-3.61293023887978	0.0379381069279494
chr12:104123226|104128517	-3.56695702309506	0.0397741406061723
chr12:106814696|106825820	-3.61293023887978	0.0379381069279494
chr12:109101902|109103611	-2.97323230317876	0.0349248453664302
chr12:109190047|109194246	-3.52034540310826	0.0416924404818337
chr12:109488572|109507735	-3.58867954063299	0.0388990873331266
chr12:11121010|11124187	-5.21294819203501	0.000320753252626317
chr12:111513357|111555919	3.67974237193828	0.0480025131578113
chr12:116096669|116111512	-2.34495514746624	0.00602515771432871
chr12:116230533|116237705	-2.40350676271477	0.000183398052983331
chr12:116833792|116836282	-3.59002472747752	0.0388459376329242
chr12:116918531|116964854	-4.14295904096307	0.0134404418357564
chr12:118233674|118244965	-3.87360697739095	0.0269251943842689
chr12:120782655|120810886	-3.60892059930204	0.0380942816648669
chr12:121581125|121595989	-3.61159420886743	0.0379900994188386
chr12:121639616|121640143	-3.60892059930204	0.0380942816648669
chr12:121796191|121802784	-3.56695702309506	0.0397741406061723
chr12:122579905|122582985	-3.85137110276161	0.0276268699171191
chr12:122584278|122594385	3.89268259104307	0.0305147717320601
chr12:122594276|122622607	-4.36634658962837	0.0071386232999163
chr12:122594276|122624688	3.8359224095789	0.0338261329375753
chr12:122594276|122666475	-4.09153901548643	0.0155903733333634
chr12:123160781|123164090	-4.36715193974533	0.0071252801113183
chr12:123645455|123652735	-3.19573164930569	0.000841128407671988
chr12:123853206|123859268	-3.9083416835946	0.025816595007735
chr12:124807761|124810289	3.69002403374889	0.0469512178867323
chr12:1289852|1444750	-3.56695702309506	0.0397741406061723
chr12:132012698|132076633	-3.91292850672517	0.0256742939414244
chr12:15889928|15895496	-3.91292850672517	0.0256742939414244
chr12:26481131|26655852	-4.5021740011141	0.00475804220802471
chr12:26595465|26602706	-2.97564743725961	0.0337476268992571
chr12:27046158|27066226	-3.56560283159053	0.0398284585654871
chr12:32598497|32611283	-4.31292463989437	0.00809845997679202
chr12:32708153|32713371	3.73060075080536	0.0430013349250589
chr12:328835|334422	-3.58867954063299	0.0388990873331266
chr12:45836589|45878005	-3.91292850672517	0.0256742939414244
chr12:46229153|46243314	-1.17386484646225	0.029035304713646
chr12:48071667|48096427	-3.56695702309506	0.0397741406061723
chr12:50129527|50130217	-3.61025766215859	0.0380421576530504
chr12:50427762|50437838	-4.29948723432444	0.00836863421665155
chr12:50453460|50454417	-4.31125842234008	0.00813120964097385
chr12:50780140|50809589	-3.91292850672517	0.0256742939414244
chr12:50780140|50814439	-3.61159420886743	0.0379900994188386
chr12:53016473|53022627	-4.99641620665117	0.000836667395176288
chr12:53016473|53034709	-3.60758302084939	0.0381464714884003
chr12:62194933|62207250	-3.5437296536934	0.0407229140993177
chr12:62484170|62495147	-3.59002472747752	0.0388459376329242
chr12:62580297|62588156	-3.59002472747752	0.0388459376329242
chr12:62672519|62675035	-3.60892059930204	0.0380942816648669
chr12:64409962|64420521	-3.60892059930204	0.0380942816648669
chr12:6446961|6448757	-3.56560283159053	0.0398284585654871
chr12:6578846|6581349	-3.52034540310826	0.0416924404818337
chr12:66338550|66342469	-3.61293023887978	0.0379381069279494
chr12:70278132|70311017	-2.18342423572113	0.000265793784280092
chr12:71656885|71660427	-4.07549737025274	0.0163077335009145
chr12:76055019|76060279	-2.95462988677353	0.0351434553273851
chr12:813642|830160	-4.51464588951627	0.00461016461732875
chr12:95040476|95049233	-3.60758302084939	0.0381464714884003
chr12:98539136|98539517	-3.61159420886743	0.0379900994188386
chr13:110893028|110910770	-3.60892059930204	0.0380942816648669
chr13:111862863|111865382	-2.52726790939692	0.0179896854018066
chr13:113495502|113534240	3.66664216055045	0.0493061977211433
chr13:113610996|113623286	-4.69174008531801	0.00266177303767882
chr13:114246947|114272665	-3.0805207913951	0.0249112486182092
chr13:19835477|19851957	-3.61293023887978	0.0379381069279494
chr13:21381434|21391854	-1.86160483817007	0.0325439332763284
chr13:24475472|24478276	4.07769147362795	0.0210341265097762
chr13:25309247|25321093	-4.36634658962837	0.0071386232999163
chr13:30227412|30283791	-2.25447277954573	0.0244470688134744
chr13:35040933|35070852	-2.52693554179046	0.0180427759764447
chr13:41252645|41263484	-3.91063611130046	0.025745345245486
chr13:41811225|41819386	-2.41538080427317	0.0265762445284133
chr13:45151687|45207505	-2.80595088143325	0.000269340937981386
chr13:49196877|49198574	-3.52034540310826	0.0416924404818337
chr13:49993793|50045232	-4.49108677751804	0.00489303086097012
chr13:50927407|50934999	3.88490490283291	0.0309403474810385
chr13:50927407|50949505	-1.82693662321579	0.00309497364806041
chr13:51251468|51252201	-3.61159420886743	0.0379900994188386
chr13:52143916|52154173	-3.61293023887978	0.0379381069279494
chr13:52657532|52659249	-3.61025766215859	0.0380421576530504
chr13:77744283|77753358	-3.60892059930204	0.0380942816648669
chr13:79341123|79378907	-3.56560283159053	0.0398284585654871
chr13:94605391|94619517	-3.5437296536934	0.0407229140993177
chr13:95034605|95053184	-3.91292850672517	0.0256742939414244
chr13:95723242|95725252	-3.5437296536934	0.0407229140993177
chr14:101991527|101995300	-3.60758302084939	0.0381464714884003
chr14:102040236|102040673	-1.93612461125484	0.00641842651158101
chr14:103336677|103339803	3.93006368747048	0.0285120728649626
chr14:103398951|103405267	-3.11756877605626	0.0224390892686901
chr14:103405076|103428440	-3.61293023887978	0.0379381069279494
chr14:105348493|105369900	-3.61293023887978	0.0379381069279494
chr14:21366439|21370488	4.04101767556268	0.0225076400534117
chr14:21371874|21373430	-3.59002472747752	0.0388459376329242
chr14:22833899|22834558	-4.10733813371841	0.0149053886958034
chr14:22950314|22952683	-1.88567107457298	0.0102176267605062
chr14:24233219|24238748	-3.61293023887978	0.0379381069279494
chr14:30628209|30675065	3.90645727150008	0.0297457099663695
chr14:31122914|31133675	-3.88872321242009	0.0264379186371382
chr14:31600153|31608317	-3.56560283159053	0.0398284585654871
chr14:32090502|32094386	-1.55280245560398	0.0110586719245169
chr14:32090502|32117287	-2.04444986600031	0.00190874743526243
chr14:34575756|34609742	2.9928948653655	0.0219441146370905
chr14:35664642|35725153	-3.63030358632709	0.00371475785571765
chr14:39151746|39159550	-3.87244322227636	0.0269624490111698
chr14:51243856|51249765	-1.61338990118737	0.0355579402994303
chr14:51243856|51258677	-3.91292850672517	0.0256742939414244
chr14:55315300|55316355	-3.81351143166836	0.0288051933707979
chr14:58488621|58512627	-2.80143021201697	0.0170960718714032
chr14:65430216|65455718	-3.54236662446207	0.0407784104595832
chr14:67823542|67835196	-2.15979984355963	0.00992972520334476
chr14:69116366|69152885	-3.61293023887978	0.0379381069279494
chr14:71026117|71036157	-1.43489509416076	0.0328838001350559
chr14:71045133|71057724	-3.23139085445583	0.000667774058989914
chr14:72945888|72947415	-3.60758302084939	0.0381464714884003
chr14:75039911|75042477	-3.59002472747752	0.0388459376329242
chr14:75113339|75124223	-3.89219078774411	0.0263285080351345
chr14:75117195|75124223	-3.89103543807787	0.0263649276153312
chr14:85294748|85303381	4.00012371622012	0.0242480912734257
chr14:88574693|88578140	-2.68653689034278	0.00942724922682161
chr14:89411934|89412490	-2.87424405773405	0.0126634886455369
chr14:91297305|91300070	-3.58598764488779	0.0390055858416525
chr14:93219212|93220411	-3.89334562864789	0.0262921390006889
chr14:96812945|96814311	-3.60758302084939	0.0381464714884003
chr14:96943517|96945382	-3.54236662446207	0.0407784104595832
chr14:99231345|99257839	-1.33634974187049	0.0175906031862055
chr15:100132007|100199423	-3.88872321242009	0.0264379186371382
chr15:100152612|100155320	-3.91178256303496	0.0257097948141339
chr15:101701086|101712001	-3.56424814253119	0.0398828434474376
chr15:23026116|23037152	-3.36187757810718	0.0100685367697024
chr15:28245881|28246897	-3.9083416835946	0.025816595007735
chr15:28292888|28317698	-4.05920749157603	0.0170589572281542
chr15:30836194|30836910	-3.61293023887978	0.0379381069279494
chr15:30908118|30914091	-3.90719370757374	0.0258522944504569
chr15:36691685|36709961	-3.85371551443705	0.0275557824394835
chr15:40902616|40903831	-3.87127895796862	0.0269997551736075
chr15:41069570|41096353	-3.91063611130046	0.025745345245486
chr15:42260958|42268032	-1.77021997433006	0.0351116518609633
chr15:42559339|42561402	-3.52034540310826	0.0416924404818337
chr15:43415594|43416416	-4.1401247092822	0.0135519909042882
chr15:44560249|44563225	-3.90719370757374	0.0258522944504569
chr15:49225205|49308777	-3.61159420886743	0.0379900994188386
chr15:49235851|49292537	-1.35108714179844	0.0394911814321515
chr15:49625113|49634794	-4.32459118022601	0.00786942626330238
chr15:50432338|50439177	-3.90719370757374	0.0258522944504569
chr15:50583089|50592626	-1.89263908582979	0.0398232902761676
chr15:50747495|50748870	4.8613356288466	0.00246576671343276
chr15:50941442|50950169	-3.90719370757374	0.0258522944504569
chr15:51451645|51453641	-4.47769583642001	0.00505830197816273
[truncated: 966 more rows]
